# Supplementary material for: A Core MYC Gene Expression Signature Is Prominent in Basal-Like Breast Cancer but Only Partially Overlaps the Core Serum Response
Source: PLoS One. 2009 Aug 19;4(8):e6693. doi: 10.1371/journal.pone.0006693 (PMC2723908; doi:10.1371/journal.pone.0006693)
Supplement: Table S2 — GO term enrichment analyses. (1.61 MB XLS) [file pone.0006693.s005.xls]

## Sheet: Summary of GO enrichment
Repressed by MYCN				Induced by MYCN				Repressed by MYCN-ER				Induced by MYCN-ER				Repressed in MYC Signature				Induced in MYC Signature
Biological process terms				Biological process terms				Biological process terms				Biological process terms				Biological process terms				Biological process terms
GO term ID	GO term description	P-value (Bonferroni-corrected)		GO term ID	GO term description	P-value (Bonferroni-corrected)		GO term ID	GO term description	P-value (Bonferroni-corrected)		GO term ID	GO term description	P-value (Bonferroni-corrected)		GO term ID	GO term description	P-value (Bonferroni-corrected)		GO term ID	GO term description	P-value (Bonferroni-corrected)
GO:0007154	cell communication	0.0004289		GO:0006139	nucleobase, nucleoside, nucleotide and nucleic acid metabolism	0		GO:0048513	organ development	3.075e-09		GO:0006396	RNA processing	0		GO:0007275	development	0.0001543		GO:0006396	RNA processing	0
GO:0048513	organ development	0.000643		GO:0006259	DNA metabolism	0		GO:0007275	development	1.842e-05		GO:0007028	cytoplasm organization and biogenesis	0		GO:0048513	organ development	0.0007301		GO:0016070	RNA metabolism	1.163e-09
GO:0050874	organismal physiological process	0.001928		GO:0006260	DNA replication	0		GO:0007154	cell communication	5.25e-05		GO:0008152	metabolism	0		GO:0007596	blood coagulation	0.001809		GO:0007046	ribosome biogenesis	4.961e-09
GO:0007517	muscle development	0.00335		GO:0006396	RNA processing	0		GO:0001501	skeletal development	8.101e-05		GO:0016070	RNA metabolism	0		GO:0050817	coagulation	0.001809		GO:0042254	ribosome biogenesis and assembly	1.705e-08
GO:0006937	regulation of muscle contraction	0.004941		GO:0006412	protein biosynthesis	0		GO:0007165	signal transduction	0.001459		GO:0043170	macromolecule metabolism	0		GO:0042060	wound healing	0.002363		GO:0007028	cytoplasm organization and biogenesis	2.585e-07
GO:0008150	biological_process	0.006157		GO:0007582	physiological process	0		GO:0050789	regulation of biological process	0.002015		GO:0044237	cellular metabolism	0		GO:0007599	hemostasis	0.002575		GO:0006364	rRNA processing	4.556e-06
GO:0009607	response to biotic stimulus	0.007243		GO:0008152	metabolism	0		GO:0009653	morphogenesis	0.002457		GO:0044238	primary metabolism	0		GO:0007165	signal transduction	0.002756		GO:0016072	rRNA metabolism	4.556e-06
GO:0007275	development	0.008709		GO:0016070	RNA metabolism	0		GO:0050794	regulation of cellular process	0.003868		GO:0007046	ribosome biogenesis	8.037e-10		GO:0007154	cell communication	0.004116		GO:0006397	mRNA processing	0.0001529
				GO:0043170	macromolecule metabolism	0		GO:0007243	protein kinase cascade	0.005785		GO:0042254	ribosome biogenesis and assembly	3.691e-09		GO:0009611	response to wounding	0.004809		GO:0043170	macromolecule metabolism	0.0001747
Compoent terms				GO:0043283	biopolymer metabolism	0						GO:0050875	cellular physiological process	1.409e-07		GO:0050878	regulation of body fluids	0.004891		GO:0000375	RNA splicing, via transesterification reactions	0.0001816
GO term ID	GO term description	P-value (Bonferroni-corrected)		GO:0044237	cellular metabolism	0						GO:0007582	physiological process	2.279e-07		GO:0050874	organismal physiological process	0.005137		GO:0000377	RNA splicing, via transesterification reactions with bulged adenosine as nucleophile	0.0001816
GO:0005576	extracellular region	1.475e-05		GO:0044238	primary metabolism	0		Function terms				GO:0006364	rRNA processing	5.085e-07		GO:0009605	response to external stimulus	0.01314		GO:0000398	nuclear mRNA splicing, via spliceosome	0.0001816
GO:0005773	vacuole	9.136e-05		GO:0050875	cellular physiological process	0		GO term ID	GO term description	P-value (Bonferroni-corrected)		GO:0016072	rRNA metabolism	5.085e-07		GO:0008150	biological_process	0.01935		GO:0044237	cellular metabolism	0.0004321
GO:0000323	lytic vacuole	0.0003001		GO:0007049	cell cycle	2.116e-10		GO:0005515	protein binding	9.784e-07		GO:0009059	macromolecule biosynthesis	7.26e-07		GO:0001558	regulation of cell growth	0.03091		GO:0016071	mRNA metabolism	0.0006413
GO:0005764	lysosome	0.0003001		GO:0007067	mitosis	7.365e-10		GO:0046870	cadmium ion binding	0.002527		GO:0009058	biosynthesis	1.37e-06		GO:0040008	regulation of growth	0.03553		GO:0008152	metabolism	0.0009274
GO:0005575	cellular_component	0.0006753		GO:0009059	macromolecule biosynthesis	4.085e-09		GO:0005507	copper ion binding	0.008821		GO:0044249	cellular biosynthesis	1.674e-06						GO:0006139	nucleobase, nucleoside, nucleotide and nucleic acid metabolism	0.001053
GO:0042611	MHC protein complex	0.0008134		GO:0000087	M phase of mitotic cell cycle	1.1e-08		GO:0003674	molecular_function	0.009124		GO:0006139	nucleobase, nucleoside, nucleotide and nucleic acid metabolism	3.964e-06						GO:0008380	RNA splicing	0.001158
GO:0042612	MHC class I protein complex	0.0008134		GO:0006261	DNA-dependent DNA replication	3.296e-08						GO:0006412	protein biosynthesis	7.493e-06		Function terms				GO:0044238	primary metabolism	0.002032
GO:0016020	membrane	0.004899		GO:0044249	cellular biosynthesis	5.012e-08						GO:0043037	translation	2.13e-05		GO term ID	GO term description	P-value (Bonferroni-corrected)		GO:0050875	cellular physiological process	0.002659
GO:0005578	extracellular matrix (sensu Metazoa)	0.006061		GO:0007046	ribosome biogenesis	5.069e-08		GO term ID	GO term description	P-value (Bonferroni-corrected)		GO:0006397	mRNA processing	4.813e-05		GO:0005520	insulin-like growth factor binding	1.46e-06		GO:0009058	biosynthesis	0.006343
GO:0031012	extracellular matrix	0.006827		GO:0000375	RNA splicing, via transesterification reactions	1.36e-07		GO:0005576	extracellular region	1.465e-06		GO:0008150	biological_process	6.499e-05		GO:0019838	growth factor binding	8.958e-06		GO:0006445	regulation of translation	0.007207
				GO:0000377	RNA splicing, via transesterification reactions with bulged adenosine as nucleophile	1.36e-07		GO:0005575	cellular_component	5.719e-05		GO:0043283	biopolymer metabolism	0.0002229		GO:0001619	lysosphingolipid and lysophosphatidic acid receptor activity	0.02681		GO:0006412	protein biosynthesis	0.007506
Function terms				GO:0000398	nuclear mRNA splicing, via spliceosome	1.36e-07		GO:0005583	fibrillar collagen	0.001018		GO:0009987	cellular process	0.0004845		GO:0045125	bioactive lipid receptor activity	0.02681		GO:0044249	cellular biosynthesis	0.009417
GO term ID	GO term description	P-value (Bonferroni-corrected)		GO:0000279	M phase	2.214e-07		GO:0005581	collagen	0.003624		GO:0016071	mRNA metabolism	0.000532		GO:0004871	signal transducer activity	0.04269
GO:0005520	insulin-like growth factor binding	0.005514		GO:0008380	RNA splicing	2.282e-07		GO:0031012	extracellular matrix	0.008743		GO:0000375	RNA splicing, via transesterification reactions	0.001521		GO:0005515	protein binding	0.04758
GO:0030106	MHC class I receptor activity	0.005514		GO:0000278	mitotic cell cycle	2.336e-07						GO:0000377	RNA splicing, via transesterification reactions with bulged adenosine as nucleophile	0.001521
				GO:0009987	cellular process	2.405e-07						GO:0000398	nuclear mRNA splicing, via spliceosome	0.001521						Function terms
				GO:0042254	ribosome biogenesis and assembly	2.575e-07						GO:0031123	RNA 3'-end processing	0.005297		Component terms				GO term ID	GO term description	P-value (Bonferroni-corrected)
				GO:0009058	biosynthesis	8.859e-07						GO:0031124	mRNA 3'-end processing	0.005297		GO term ID	GO term description	P-value (Bonferroni-corrected)		GO:0003723	RNA binding	5.019e-09
				GO:0016071	mRNA metabolism	1.828e-06						GO:0006457	protein folding	0.008455		GO:0005576	extracellular region	3.828e-08		GO:0003735	structural constituent of ribosome	2.021e-07
				GO:0006397	mRNA processing	2.137e-06										GO:0005575	cellular_component	0.0001804		GO:0003676	nucleic acid binding	0.000409
				GO:0044260	cellular macromolecule metabolism	2.732e-06										GO:0005615	extracellular space	0.01351		GO:0051082	unfolded protein binding	0.001132
				GO:0006281	DNA repair	3.178e-06										GO:0016020	membrane	0.01713
				GO:0006996	organelle organization and biogenesis	3.911e-06						Function terms
				GO:0044267	cellular protein metabolism	4.581e-06						GO term ID	GO term description	P-value (Bonferroni-corrected)
				GO:0006364	rRNA processing	5.432e-06						GO:0003735	structural constituent of ribosome	0						Component terms
				GO:0016072	rRNA metabolism	5.432e-06						GO:0003723	RNA binding	1.477e-07						GO term ID	GO term description	P-value (Bonferroni-corrected)
				GO:0019538	protein metabolism	7.683e-06						GO:0003674	molecular_function	3.899e-05						GO:0030529	ribonucleoprotein complex	0
				GO:0007028	cytoplasm organization and biogenesis	1.468e-05						GO:0003676	nucleic acid binding	0.0002901						GO:0005622	intracellular	2.881e-07
				GO:0006974	response to DNA damage stimulus	1.489e-05						GO:0051082	unfolded protein binding	0.001916						GO:0043227	membrane-bound organelle	6.944e-07
				GO:0009719	response to endogenous stimulus	5.944e-05						GO:0000166	nucleotide binding	0.00619						GO:0043231	intracellular membrane-bound organelle	6.944e-07
				GO:0006270	DNA replication initiation	8.871e-05														GO:0005730	nucleolus	1.366e-06
				GO:0006457	protein folding	8.918e-05														GO:0043226	organelle	4.41e-06
				GO:0008150	biological_process	0.000173														GO:0043229	intracellular organelle	4.41e-06
				GO:0051301	cell division	0.0002499						Component terms								GO:0005634	nucleus	1.329e-05
				GO:0000074	regulation of progression through cell cycle	0.0006492						GO term ID	GO term description	P-value (Bonferroni-corrected)						GO:0043234	protein complex	1.598e-05
				GO:0050794	regulation of cellular process	0.002927						GO:0005622	intracellular	0						GO:0005737	cytoplasm	0.0008319
				GO:0007051	spindle organization and biogenesis	0.005392						GO:0005739	mitochondrion	0						GO:0005739	mitochondrion	0.001361
				GO:0006323	DNA packaging	0.008053						GO:0030529	ribonucleoprotein complex	0						GO:0043228	non-membrane-bound organelle	0.002666
				GO:0050789	regulation of biological process	0.008907						GO:0043227	membrane-bound organelle	0						GO:0043232	intracellular non-membrane-bound organelle	0.002666
				GO:0006445	regulation of translation	0.00951						GO:0043231	intracellular membrane-bound organelle	0						GO:0005732	small nucleolar ribonucleoprotein complex	0.008626
												GO:0043226	organelle	7.244e-11
												GO:0043229	intracellular organelle	7.244e-11
												GO:0005737	cytoplasm	2.367e-09
				Function terms								GO:0005840	ribosome	1.399e-06
				GO term ID	GO term description	P-value (Bonferroni-corrected)						GO:0005730	nucleolus	1.751e-06
				GO:0003676	nucleic acid binding	0						GO:0043234	protein complex	1.836e-06
				GO:0003723	RNA binding	0						GO:0005634	nucleus	1.856e-06
				GO:0003735	structural constituent of ribosome	0						GO:0005623	cell	3.678e-05
				GO:0000166	nucleotide binding	9.909e-08						GO:0000313	organellar ribosome	0.000208
				GO:0005488	binding	1.194e-06						GO:0005761	mitochondrial ribosome	0.000208
				GO:0003677	DNA binding	6.674e-06						GO:0015935	small ribosomal subunit	0.000208
				GO:0005198	structural molecule activity	1.532e-05						GO:0005575	cellular_component	0.0006107
				GO:0051082	unfolded protein binding	3.006e-05						GO:0043228	non-membrane-bound organelle	0.001699
				GO:0005524	ATP binding	0.00011						GO:0043232	intracellular non-membrane-bound organelle	0.001699
				GO:0030554	adenyl nucleotide binding	0.0001955						GO:0000314	organellar small ribosomal subunit	0.003327
				GO:0003674	molecular_function	0.0003976						GO:0005763	mitochondrial small ribosomal subunit	0.003327
				GO:0008094	DNA-dependent ATPase activity	0.001182						GO:0005759	mitochondrial matrix	0.007002
				GO:0017076	purine nucleotide binding	0.00243
				Component terms
				GO term ID	GO term description	P-value (Bonferroni-corrected)
				GO:0005622	intracellular	0
				GO:0005830	cytosolic ribosome (sensu Eukaryota)	0
				GO:0005840	ribosome	0
				GO:0005842	cytosolic large ribosomal subunit (sensu Eukaryota)	0
				GO:0015934	large ribosomal subunit	0
				GO:0030529	ribonucleoprotein complex	0
				GO:0043227	membrane-bound organelle	0
				GO:0043228	non-membrane-bound organelle	0
				GO:0043231	intracellular membrane-bound organelle	0
				GO:0043232	intracellular non-membrane-bound organelle	0
				GO:0043234	protein complex	0
				GO:0043226	organelle	5.651e-10
				GO:0043229	intracellular organelle	5.651e-10
				GO:0005634	nucleus	1.22e-09
				GO:0005730	nucleolus	4.993e-09
				GO:0005623	cell	1.351e-08
				GO:0005694	chromosome	5.564e-08
				GO:0005737	cytoplasm	2.9e-07
				GO:0005739	mitochondrion	2.439e-06
				GO:0005575	cellular_component	5.018e-06
				GO:0005681	spliceosome complex	0.000142
				GO:0015935	small ribosomal subunit	0.001121
				GO:0016282	eukaryotic 43S preinitiation complex	0.001121
				GO:0005759	mitochondrial matrix	0.001462
				GO:0005829	cytosol	0.00169
				GO:0005732	small nucleolar ribonucleoprotein complex	0.003825
				GO:0000785	chromatin	0.006136

## Sheet: Repressed by MYCN
		Biological process terms											Compoent terms													Function terms
	GO term ID	GO:0007154	GO:0048513	GO:0050874	GO:0007517	GO:0006937	GO:0008150	GO:0009607	GO:0007275			GO term ID	GO:0005576	GO:0005773	GO:0000323	GO:0005764	GO:0005575	GO:0042611	GO:0042612	GO:0016020	GO:0005578	GO:0031012			GO term ID	GO:0005520	GO:0030106
	GO term description	cell communication	organ development	organismal physiological process	muscle development	regulation of muscle contraction	biological_process	response to biotic stimulus	development			GO term description	extracellular region	vacuole	lytic vacuole	lysosome	cellular_component	MHC protein complex	MHC class I protein complex	membrane	extracellular matrix (sensu Metazoa)	extracellular matrix			GO term description	insulin-like growth factor binding	MHC class I receptor activity
	P-value (Bonferroni-corrected)	0.0004289	0.000643	0.001928	0.00335	0.004941	0.006157	0.007243	0.008709			P-value (Bonferroni-corrected)	1.475e-05	9.136e-05	0.0003001	0.0003001	0.0006753	0.0008134	0.0008134	0.004899	0.006061	0.006827			P-value (Bonferroni-corrected)	0.005514	0.005514
	Member genes	O00300(TNFRSF11B)	O00300(TNFRSF11B)	O43889(CREB3)	O43556(SGCE)	P09493(TPM1)	O00115(DNASE2)	O60507(TPST1)	O00115(DNASE2)			Member	O00300(TNFRSF11B)	O00115(DNASE2)	O00115(DNASE2)	O00115(DNASE2)	O00115(DNASE2)	P01889(HLA-B)	P01889(HLA-B)	O14495(PPAP2B)	O00339(MATN2)	O00339(MATN2)			Member	P17936(IGFBP3)	P01889(HLA-B)
		O14966(RAB7L1)	O15266(SHOX)	O60218(AKR1B10)	P09493(TPM1)	P10916(MYL2)	O00142(TK2)	O75159(SOCS5)	O00300(TNFRSF11B)			genes	O00339(MATN2)	O15118(NPC1)	O15118(NPC1)	O15118(NPC1)	O00142(TK2)	P17693(HLA-G)	P17693(HLA-G)	O15118(NPC1)	O15230(LAMA5)	O15230(LAMA5)			genes	P22692(IGFBP4)	P17693(HLA-G)
		O15230(LAMA5)	O43556(SGCE)	O60507(TPST1)	P10916(MYL2)	P24844(MYL9)	O00233(PSMD9)	O95236(APOL3)	O15230(LAMA5)				O15230(LAMA5)	O75379(VAMP4)	O75379(VAMP4)	O75379(VAMP4)	O00233(PSMD9)	P30443(HLA-A)	P30443(HLA-A)	O15403(SLC16A6)	O43556(SGCE)	O43556(SGCE)				P24592(IGFBP6)	P30443(HLA-A)
		O15484(CAPN5)	O60902(SHOX2)	O75159(SOCS5)	P17936(IGFBP3)	P45379(TNNT2)	O00300(TNFRSF11B)	P00736(C1R)	O15266(SHOX)				O43556(SGCE)	P04062(GBA)	P04062(GBA)	P04062(GBA)	O00300(TNFRSF11B)	P30511(HLA-F)	P30511(HLA-F)	O43556(SGCE)	P08253(MMP2)	P08253(MMP2)				Q16270(IGFBP7)	P30511(HLA-F)
		O43556(SGCE)	O75159(SOCS5)	O95236(APOL3)	P20472(PVALB)	P51911(CNN1)	O00339(MATN2)	P01889(HLA-B)	O43556(SGCE)				O60565(GREM1)	P04066(FUCA1)	P04066(FUCA1)	P04066(FUCA1)	O00339(MATN2)	Q95460(MR1)	Q95460(MR1)	O43889(CREB3)	P08254(MMP3)	P08254(MMP3)				Q9NQ30(ESM1)	Q95460(MR1)
		O60504(SORBS3)	P03950(ANG)	O95371(OR2C1)	P24844(MYL9)	Q02045(MYL5)	O14495(PPAP2B)	P01919(HLA-DQB1)	O60565(GREM1)				O75690(KRTAP5-8)	P07602(PSAP)	P07602(PSAP)	P07602(PSAP)	O14495(PPAP2B)			O60238(BNIP3L)	P08294(SOD3)	P08294(SOD3)
		O60711(LPXN)	P09493(TPM1)	P00736(C1R)	P45379(TNNT2)		O14966(RAB7L1)	P05155(SERPING1)	O60902(SHOX2)				O76061(STC2)	P13473(LAMP2)	P13473(LAMP2)	P13473(LAMP2)	O15118(NPC1)			O60296(TRAK2)	P09238(MMP10)	P09238(MMP10)
		O75159(SOCS5)	P10451(SPP1)	P01213(PDYN)	Q02045(MYL5)		O15118(NPC1)	P05161(ISG15)	O75159(SOCS5)				O94907(DKK1)	P17405(SMPD1)	P17405(SMPD1)	P17405(SMPD1)	O15230(LAMA5)			O60426(FADS3)	P10451(SPP1)	P10451(SPP1)
		O75563(SKAP2)	P10916(MYL2)	P01889(HLA-B)	Q05682(CALD1)		O15230(LAMA5)	P09871(C1S)	O76011(KRT34)				O95236(APOL3)	P51688(SGSH)	P51688(SGSH)	P51688(SGSH)	O15266(SHOX)			O60478(GPR137B)	P12107(COL11A1)	P12107(COL11A1)
		O76061(STC2)	P12107(COL11A1)	P01919(HLA-DQB1)	Q13642(FHL1)		O15266(SHOX)	P10451(SPP1)	O94907(DKK1)				P00736(C1R)	Q12794(HYAL1)	Q12794(HYAL1)	Q12794(HYAL1)	O15403(SLC16A6)			O60507(TPST1)	P24821(TNC)	P24821(TNC)
		O94907(DKK1)	P17301(ITGA2)	P02489(CRYAA)	Q16585(SGCB)		O15403(SLC16A6)	P13164(IFITM1)	O95238(SPDEF)				P05121(SERPINE1)	Q99519(NEU1)	Q99519(NEU1)	Q99519(NEU1)	O15460(P4HA2)			O60513(B4GALT4)	P28300(LOX)	P28300(LOX)
		O95236(APOL3)	P17936(IGFBP3)	P02511(CRYAB)	Q9UKP3(ITGB1BP2)		O15460(P4HA2)	P13726(F3)	P03950(ANG)				P05155(SERPING1)	Q99538(LGMN)	Q99538(LGMN)	Q99538(LGMN)	O15484(CAPN5)			O75379(VAMP4)	P42263(GRIA3)	P42263(GRIA3)
		O95371(OR2C1)	P20472(PVALB)	P05121(SERPINE1)	Q9UKV0(HDAC9)		O15484(CAPN5)	P13987(CD59)	P09493(TPM1)				P05161(ISG15)	Q9UHL4(DPP7)	Q9UHL4(DPP7)	Q9UHL4(DPP7)	O43556(SGCE)			O95371(OR2C1)	P48307(TFPI2)	P48307(TFPI2)
		O95865(DDAH2)	P22692(IGFBP4)	P05155(SERPING1)			O43556(SGCE)	P17693(HLA-G)	P10451(SPP1)				P07602(PSAP)	Q9Y5K8(ATP6V1D)			O43707(ACTN4)			P01213(PDYN)	P55268(LAMB2)	P55268(LAMB2)
		P01213(PDYN)	P24844(MYL9)	P05161(ISG15)			O43633(CHMP2A)	P20023(CR2)	P10916(MYL2)				P08253(MMP2)				O43889(CREB3)			P01889(HLA-B)	Q16585(SGCB)	Q16585(SGCB)
		P02511(CRYAB)	P40426(PBX3)	P09493(TPM1)			O43707(ACTN4)	P20591(MX1)	P12034(FGF5)				P08254(MMP3)				O60218(AKR1B10)			P01919(HLA-DQB1)	Q16610(ECM1)	Q16610(ECM1)
		P05161(ISG15)	P45379(TNNT2)	P09871(C1S)			O43889(CREB3)	P20592(MX2)	P12107(COL11A1)				P08294(SOD3)				O60238(BNIP3L)			P02730(IL8)	Q16787(LAMA3)	Q16787(LAMA3)
		P08648(ITGA5)	P49767(VEGFC)	P10451(SPP1)			O60218(AKR1B10)	P23771(GATA3)	P17301(ITGA2)				P09238(MMP10)				O60296(TRAK2)			P04062(GBA)	Q96A84(EMID1)	Q96A84(EMID1)
		P09601(HMOX1)	P55287(CDH11)	P10916(MYL2)			O60238(BNIP3L)	P27487(DPP4)	P17405(SMPD1)				P09871(C1S)				O60426(FADS3)			P04156(PRNP)	Q9BXX0(EMILIN2)	Q9BXX0(EMILIN2)
		P10451(SPP1)	Q02045(MYL5)	P12107(COL11A1)			O60296(TRAK2)	P29728(OAS2)	P17481(HOXB8)				P10451(SPP1)				O60478(GPR137B)			P06734(FCER2)	Q9HCU0(CD248)	Q9HCU0(CD248)
		P10721(KIT)	Q03431(PTH1R)	P13164(IFITM1)			O60426(FADS3)	P30443(HLA-A)	P17936(IGFBP3)				P12034(FGF5)				O60504(SORBS3)			P07602(PSAP)	Q9UBX5(FBLN5)	Q9UBX5(FBLN5)
		P12034(FGF5)	Q05682(CALD1)	P13726(F3)			O60504(SORBS3)	P30511(HLA-F)	P20472(PVALB)				P12107(COL11A1)				O60507(TPST1)			P08648(ITGA5)
		P12107(COL11A1)	Q13642(FHL1)	P13987(CD59)			O60507(TPST1)	P32455(GBP1)	P22692(IGFBP4)				P15121(AKR1B1)				O60513(B4GALT4)			P09923(ALPI)
		P13164(IFITM1)	Q15389(ANGPT1)	P17301(ITGA2)			O60513(B4GALT4)	P40121(CAPG)	P23560(BDNF)				P17936(IGFBP3)				O60565(GREM1)			P10721(KIT)
		P13987(CD59)	Q16394(EXT1)	P17693(HLA-G)			O60565(GREM1)	P40189(IL6ST)	P23771(GATA3)				P19823(ITIH2)				O60711(LPXN)			P13164(IFITM1)
		P16234(PDGFRA)	Q16585(SGCB)	P20023(CR2)			O60711(LPXN)	P48061(CXCL12)	P24592(IGFBP6)				P22692(IGFBP4)				O60902(SHOX2)			P13473(LAMP2)
		P17301(ITGA2)	Q92882(OSTF1)	P20591(MX1)			O60902(SHOX2)	P52630(STAT2)	P24844(MYL9)				P24592(IGFBP6)				O75159(SOCS5)			P13498(CYBA)
		P17405(SMPD1)	Q99814(EPAS1)	P20592(MX2)			O75159(SOCS5)	Q00978(IRF9)	P40123(CAP2)				P24821(TNC)				O75379(VAMP4)			P13726(F3)
		P17936(IGFBP3)	Q9H165(BCL11A)	P23771(GATA3)			O75379(VAMP4)	Q01524(DEFA6)	P40426(PBX3)				P28300(LOX)				O75410(TACC1)			P13987(CD59)
		P20337(RAB3B)	Q9UKP3(ITGB1BP2)	P24844(MYL9)			O75410(TACC1)	Q13488(TCIRG1)	P45379(TNNT2)				P35318(ADM)				O75556(SCGB2A1)			P16234(PDGFRA)
		P20591(MX1)	Q9UKV0(HDAC9)	P27487(DPP4)			O75556(SCGB2A1)	Q14496(IFI44)	P49767(VEGFC)				P42263(GRIA3)				O75683(SURF6)			P17301(ITGA2)
		P21453(S1PR1)		P29728(OAS2)			O75563(SKAP2)	Q8IYM9(TRIM22)	P52926(HMGA2)				P48060(GLIPR1)				O75690(KRTAP5-8)			P17693(HLA-G)
		P22692(IGFBP4)		P30443(HLA-A)			O75683(SURF6)	Q8N690(DEFB119)	P55287(CDH11)				P48061(CXCL12)				O76011(KRT34)			P20023(CR2)
		P23229(ITGA6)		P30511(HLA-F)			O75690(KRTAP5-8)	Q92956(TNFRSF14)	Q02045(MYL5)				P48307(TFPI2)				O76061(STC2)			P21453(S1PR1)
		P23468(PTPRD)		P30559(OXTR)			O76011(KRT34)	Q95460(MR1)	Q03431(PTH1R)				P49908(SEPP1)				O94907(DKK1)			P21589(NT5E)
		P24592(IGFBP6)		P32455(GBP1)			O76061(STC2)	Q99685(MGLL)	Q05682(CALD1)				P55268(LAMB2)				O94925(GLS)			P22794(OMG)
		P24821(TNC)		P35318(ADM)			O94907(DKK1)	Q9NPB9(CCRL1)	Q09666(AHNAK)				Q00887(PSG9)				O94929(ABLIM3)			P23229(ITGA6)
		P28300(LOX)		P35348(BCL2L1)			O94925(GLS)	Q9UKV0(HDAC9)	Q13467(FZD5)				Q01524(DEFA6)				O95236(APOL3)			P23468(PTPRD)
		P30559(OXTR)		P40189(IL6ST)			O94929(ABLIM3)	Q9Y5P4(COL4A3BP)	Q13557(CAMK2D)				Q12794(HYAL1)				O95238(SPDEF)			P24310(COX7A1)
		P35318(ADM)		P43005(SLC1A1)			O95084(PRSS23)		Q13642(FHL1)				Q12841(FSTL1)				O95302(FKBP9)			P27487(DPP4)
		P35348(BCL2L1)		P45379(TNNT2)			O95236(APOL3)		Q14563(SEMA3A)				Q14563(SEMA3A)				O95371(OR2C1)			P29728(OAS2)
		P40123(CAP2)		P48061(CXCL12)			O95238(SPDEF)		Q15389(ANGPT1)				Q16270(IGFBP7)				O95571(ETHE1)			P30443(HLA-A)
		P40189(IL6ST)		P48307(TFPI2)			O95302(FKBP9)		Q16270(IGFBP7)				Q16585(SGCB)				P00352(ALDH1A1)			P30511(HLA-F)
		P42263(GRIA3)		P49407(ARRB1)			O95371(OR2C1)		Q16394(EXT1)				Q16610(ECM1)				P00736(C1R)			P30559(OXTR)
		P43005(SLC1A1)		P51911(CNN1)			O95865(DDAH2)		Q16585(SGCB)				Q16787(LAMA3)				P01106()			P33897(ABCD1)
		P47224(RABIF)		P55268(LAMB2)			P00352(ALDH1A1)		Q16787(LAMA3)				Q16820(MEP1B)				P01213(PDYN)			P35348(BCL2L1)
		P48061(CXCL12)		P55287(CDH11)			P00736(C1R)		Q92882(OSTF1)				Q8IWU6(SULF1)				P01889(HLA-B)			P36021(SLC16A2)
		P49407(ARRB1)		Q00887(PSG9)			P01106()		Q92886(NEUROG1)				Q8WXF3(RLN3)				P01919(HLA-DQB1)			P40123(CAP2)
		P49767(VEGFC)		Q00978(IRF9)			P01213(PDYN)		Q92915(FGF14)				Q92915(FGF14)				P02511(CRYAB)			P40189(IL6ST)
		P49810(PSEN2)		Q01524(DEFA6)			P01889(HLA-B)		Q93045(STMN2)				Q96A84(EMID1)				P02730(IL8)			P41439(FOLR3)
		P52630(STAT2)		Q02045(MYL5)			P01919(HLA-DQB1)		Q96HZ4(HES6)				Q9BXX0(EMILIN2)				P04062(GBA)			P42263(GRIA3)
		P55268(LAMB2)		Q05682(CALD1)			P02489(CRYAA)		Q96QB1(DLC1)				Q9H1J7(WNT5B)				P04066(FUCA1)			P43005(SLC1A1)
		P55287(CDH11)		Q06124(PTPN11)			P02511(CRYAB)		Q99689(FEZ1)				Q9HCU0(CD248)				P04156(PRNP)			P48060(GLIPR1)
		P78552(IL13RA1)		Q13488(TCIRG1)			P02730(IL8)		Q99814(EPAS1)				Q9NQ30(ESM1)				P05121(SERPINE1)			P49407(ARRB1)
		Q00978(IRF9)		Q16820(MEP1B)			P03950(ANG)		Q99958(FOXC2)				Q9UBX5(FBLN5)				P05155(SERPING1)			P49767(VEGFC)
		Q03431(PTH1R)		Q8IYM9(TRIM22)			P04062(GBA)		Q9BYE9(PCDH24)								P05161(ISG15)			P49810(PSEN2)
		Q05513(PRKCZ)		Q92882(OSTF1)			P04066(FUCA1)		Q9H165(BCL11A)								P06734(FCER2)			P55287(CDH11)
		Q06124(PTPN11)		Q92956(TNFRSF14)			P04156(PRNP)		Q9H1J7(WNT5B)								P07384(CAPN1)			P78552(IL13RA1)
		Q08431(MFGE8)		Q95460(MR1)			P05121(SERPINE1)		Q9H3S1(SEMA4A)								P07602(PSAP)			P80723(BASP1)
		Q13444(ADAM15)		Q99685(MGLL)			P05155(SERPING1)		Q9NQ30(ESM1)								P08253(MMP2)			Q03431(PTH1R)
		Q13467(FZD5)		Q9H0R8(GABARAPL1)			P05161(ISG15)		Q9NZT1(CALML5)								P08254(MMP3)			Q03715(CEACAM4)
		Q13586(STIM1)		Q9NPB9(CCRL1)			P07384(CAPN1)		Q9UKP3(ITGB1BP2)								P08294(SOD3)			Q05513(PRKCZ)
		Q13636(RAB31)		Q9NRQ2(PLSCR4)			P07602(PSAP)		Q9UKV0(HDAC9)								P08648(ITGA5)			Q07065(CKAP4)
		Q13822(ENPP2)		Q9UKV0(HDAC9)			P08253(MMP2)										P09104(ENO2)			Q12882(DPYD)
		Q14318(FKBP8)		Q9Y5P4(COL4A3BP)			P08254(MMP3)										P09238(MMP10)			Q13018(PLA2R1)
		Q15389(ANGPT1)					P08294(SOD3)										P09493(TPM1)			Q13444(ADAM15)
		Q15628(TRADD)					P08648(ITGA5)										P09601(HMOX1)			Q13467(FZD5)
		Q16394(EXT1)					P09104(ENO2)										P09871(C1S)			Q13488(TCIRG1)
		Q16610(ECM1)					P09238(MMP10)										P09923(ALPI)			Q13530(SERINC3)
		Q16787(LAMA3)					P09493(TPM1)										P10451(SPP1)			Q13586(STIM1)
		Q7Z5R6(APBB1IP)					P09601(HMOX1)										P10721(KIT)			Q13813(SPTAN1)
		Q8IWQ7(CDC42BPA)					P09871(C1S)										P10916(MYL2)			Q13822(ENPP2)
		Q8N144(GJD3)					P09923(ALPI)										P12034(FGF5)			Q14410(GK2)
		Q8TDZ2(MICAL1)					P10451(SPP1)										P12107(COL11A1)			Q16394(EXT1)
		Q8WW43(APH1B)					P10721(KIT)										P13164(IFITM1)			Q16585(SGCB)
		Q92633(LPAR1)					P10916(MYL2)										P13473(LAMP2)			Q16820(MEP1B)
		Q92882(OSTF1)					P12034(FGF5)										P13498(CYBA)			Q7Z7M9(GALNT5)
		Q92915(FGF14)					P12107(COL11A1)										P13726(F3)			Q8IWQ7(CDC42BPA)
		Q92956(TNFRSF14)					P13164(IFITM1)										P13987(CD59)			Q8IY34(SLC15A3)
		Q92963(RIT1)					P13498(CYBA)										P15121(AKR1B1)			Q8N144(GJD3)
		Q93045(STMN2)					P13726(F3)										P16234(PDGFRA)			Q8NCK7(SLC16A11)
		Q96AM1(MRGPRF)					P13987(CD59)										P17301(ITGA2)			Q8NCL4(GALNT6)
		Q96JQ0(DCHS1)					P15121(AKR1B1)										P17405(SMPD1)			Q8TCT8(SPPL2A)
		Q96QB1(DLC1)					P16234(PDGFRA)										P17481(HOXB8)			Q8TDE7(TOM1L2)
		Q99689(FEZ1)					P17301(ITGA2)										P17693(HLA-G)			Q8WUG5(SLC22A17)
		Q99814(EPAS1)					P17405(SMPD1)										P17936(IGFBP3)			Q8WW43(APH1B)
		Q9BXX0(EMILIN2)					P17481(HOXB8)										P19823(ITIH2)			Q92633(LPAR1)
		Q9BYB4(GNB1L)					P17693(HLA-G)										P20023(CR2)			Q92843(BCL2L2)
		Q9BYE9(PCDH24)					P17936(IGFBP3)										P20290(C5orf32)			Q92956(TNFRSF14)
		Q9H0R8(GABARAPL1)					P19823(ITIH2)										P20591(MX1)			Q92963(RIT1)
		Q9H1J7(WNT5B)					P20023(CR2)										P20592(MX2)			Q93045(STMN2)
		Q9H2X6(HIPK2)					P20290(C5orf32)										P21291(CSRP1)			Q95460(MR1)
		Q9HCN3(TMEM8)					P20337(RAB3B)										P21453(S1PR1)			Q96AM1(MRGPRF)
		Q9NPB9(CCRL1)					P20472(PVALB)										P21589(NT5E)			Q96G97(BSCL2)
		Q9NR99(MXRA5)					P20591(MX1)										P22692(IGFBP4)			Q96JB6(LOXL4)
		Q9NRA0(DBP)					P20592(MX2)										P22794(OMG)			Q96JQ0(DCHS1)
		Q9NWX5(ASB6)					P21453(S1PR1)										P23229(ITGA6)			Q96JQ2(CLMN)
		Q9NYS7(WSB2)					P21589(NT5E)										P23468(PTPRD)			Q96KC8(DNAJC1)
		Q9NZT1(CALML5)					P22692(IGFBP4)										P23771(GATA3)			Q96S97(MYADM)
		Q9UBV2(SEL1L)					P23229(ITGA6)										P24310(COX7A1)			Q99536(VAT1)
		Q9UBX5(FBLN5)					P23468(PTPRD)										P24385(CCND1)			Q9BVV2(C20orf195)
		Q9UKE5(TNIK)					P23560(BDNF)										P24592(IGFBP6)			Q9BYB4(GNB1L)
		Q9UKP3(ITGB1BP2)					P23771(GATA3)										P24821(TNC)			Q9BYE9(PCDH24)
		Q9UN70(PCDHGC3)					P24310(COX7A1)										P24844(MYL9)			Q9BZL3(MST150)
							P24385(CCND1)										P27487(DPP4)			Q9H013(ADAM19)
							P24592(IGFBP6)										P27635(DNASE1L1)			Q9H0R8(GABARAPL1)
							P24821(TNC)										P28300(LOX)			Q9H2X9(SLC12A5)
							P24844(MYL9)										P29728(OAS2)			Q9H3S1(SEMA4A)
							P27487(DPP4)										P30039(PBLD)			Q9HCH5(SYTL2)
							P27635(DNASE1L1)										P30443(HLA-A)			Q9HCN3(TMEM8)
							P28161(GSTM2)										P30511(HLA-F)			Q9HCQ5(GALNT9)
							P28300(LOX)										P30559(OXTR)			Q9NPB9(CCRL1)
							P28562(DUSP1)										P33897(ABCD1)			Q9NRQ2(PLSCR4)
							P29728(OAS2)										P35318(ADM)			Q9NRX5(SERINC1)
							P30039(PBLD)										P35348(BCL2L1)			Q9NU53(C6orf72)
							P30443(HLA-A)										P36021(SLC16A2)			Q9P0I2(TMEM111)
							P30511(HLA-F)										P40121(CAPG)			Q9UBV2(SEL1L)
							P30559(OXTR)										P40123(CAP2)			Q9UHQ4(BCAP29)
							P32455(GBP1)										P40189(IL6ST)			Q9UN70(PCDHGC3)
							P33897(ABCD1)										P40426(PBX3)			Q9Y5K8(ATP6V1D)
							P35318(ADM)										P41439(FOLR3)			Q9Y5Y5(PEX16)
							P35348(BCL2L1)										P42263(GRIA3)			Q9Y6F6(MRVI1)
							P36021(SLC16A2)										P43005(SLC1A1)
							P36959(GMPR)										P45379(TNNT2)
							P40121(CAPG)										P48060(GLIPR1)
							P40123(CAP2)										P48061(CXCL12)
							P40189(IL6ST)										P48307(TFPI2)
							P40426(PBX3)										P49407(ARRB1)
							P41439(FOLR3)										P49767(VEGFC)
							P42263(GRIA3)										P49810(PSEN2)
							P43005(SLC1A1)										P49908(SEPP1)
							P45379(TNNT2)										P51688(SGSH)
							P46952(HAAO)										P52630(STAT2)
							P47224(RABIF)										P52926(HMGA2)
							P48061(CXCL12)										P55268(LAMB2)
							P48307(TFPI2)										P55287(CDH11)
							P49407(ARRB1)										P78552(IL13RA1)
							P49767(VEGFC)										P78559(MAP1A)
							P49810(PSEN2)										P80723(BASP1)
							P49908(SEPP1)										Q00887(PSG9)
							P51688(SGSH)										Q00978(IRF9)
							P51911(CNN1)										Q01524(DEFA6)
							P52630(STAT2)										Q02045(MYL5)
							P52926(HMGA2)										Q02218(OGDH)
							P53004(BLVRA)										Q03431(PTH1R)
							P55268(LAMB2)										Q03715(CEACAM4)
							P55287(CDH11)										Q05513(PRKCZ)
							P78552(IL13RA1)										Q05639(EEF1A2)
							P80297(MT1X)										Q05682(CALD1)
							P98082(DAB2)										Q07065(CKAP4)
							Q00887(PSG9)										Q08431(MFGE8)
							Q00978(IRF9)										Q09666(AHNAK)
							Q01524(DEFA6)										Q12794(HYAL1)
							Q02045(MYL5)										Q12841(FSTL1)
							Q02218(OGDH)										Q12882(DPYD)
							Q03431(PTH1R)										Q13018(PLA2R1)
							Q05513(PRKCZ)										Q13444(ADAM15)
							Q05639(EEF1A2)										Q13467(FZD5)
							Q05682(CALD1)										Q13488(TCIRG1)
							Q06124(PTPN11)										Q13530(SERINC3)
							Q08431(MFGE8)										Q13557(CAMK2D)
							Q09666(AHNAK)										Q13586(STIM1)
							Q12794(HYAL1)										Q13642(FHL1)
							Q12882(DPYD)										Q13813(SPTAN1)
							Q13444(ADAM15)										Q13822(ENPP2)
							Q13467(FZD5)										Q14410(GK2)
							Q13488(TCIRG1)										Q14496(IFI44)
							Q13557(CAMK2D)										Q14563(SEMA3A)
							Q13586(STIM1)										Q16270(IGFBP7)
							Q13636(RAB31)										Q16394(EXT1)
							Q13642(FHL1)										Q16585(SGCB)
							Q13813(SPTAN1)										Q16610(ECM1)
							Q13822(ENPP2)										Q16787(LAMA3)
							Q14318(FKBP8)										Q16820(MEP1B)
							Q14410(GK2)										Q7Z7M9(GALNT5)
							Q14496(IFI44)										Q8IVU3(HERC6)
							Q14563(SEMA3A)										Q8IWQ7(CDC42BPA)
							Q15389(ANGPT1)										Q8IWU6(SULF1)
							Q15628(TRADD)										Q8IXP9(HERC4)
							Q16270(IGFBP7)										Q8IY34(SLC15A3)
							Q16394(EXT1)										Q8IYM9(TRIM22)
							Q16585(SGCB)										Q8N144(GJD3)
							Q16610(ECM1)										Q8N2R0(OSR2)
							Q16787(LAMA3)										Q8NBJ7(SUMF2)
							Q16820(MEP1B)										Q8NCK7(SLC16A11)
							Q7Z5R6(APBB1IP)										Q8NCL4(GALNT6)
							Q7Z7M9(GALNT5)										Q8TCT8(SPPL2A)
							Q8IVU3(HERC6)										Q8TDE7(TOM1L2)
							Q8IWQ7(CDC42BPA)										Q8TDZ2(MICAL1)
							Q8IWU6(SULF1)										Q8WUG5(SLC22A17)
							Q8IXP9(HERC4)										Q8WV44(TRIM41)
							Q8IY34(SLC15A3)										Q8WW43(APH1B)
							Q8IYM9(TRIM22)										Q8WWX9(SELM)
							Q8N144(GJD3)										Q8WXF3(RLN3)
							Q8N690(DEFB119)										Q92633(LPAR1)
							Q8NCK7(SLC16A11)										Q92804(TAF15)
							Q8NCL4(GALNT6)										Q92843(BCL2L2)
							Q8TCT8(SPPL2A)										Q92871(PMM1)
							Q8TDE7(TOM1L2)										Q92882(OSTF1)
							Q8TDX7(NEK7)										Q92886(NEUROG1)
							Q8TDZ2(MICAL1)										Q92915(FGF14)
							Q8WUG5(SLC22A17)										Q92956(TNFRSF14)
							Q8WV44(TRIM41)										Q92963(RIT1)
							Q8WW43(APH1B)										Q93045(STMN2)
							Q8WXF3(RLN3)										Q95460(MR1)
							Q92633(LPAR1)										Q96A84(EMID1)
							Q92843(BCL2L2)										Q96AM1(MRGPRF)
							Q92871(PMM1)										Q96CV9(OPTN)
							Q92882(OSTF1)										Q96G97(BSCL2)
							Q92886(NEUROG1)										Q96HZ4(HES6)
							Q92915(FGF14)										Q96JB6(LOXL4)
							Q92956(TNFRSF14)										Q96JQ0(DCHS1)
							Q92963(RIT1)										Q96JQ2(CLMN)
							Q93045(STMN2)										Q96KC8(DNAJC1)
							Q93062(RBPMS)										Q96QB1(DLC1)
							Q95460(MR1)										Q96S97(MYADM)
							Q969K7(TMEM54)										Q99519(NEU1)
							Q96A84(EMID1)										Q99536(VAT1)
							Q96AM1(MRGPRF)										Q99538(LGMN)
							Q96G97(BSCL2)										Q99814(EPAS1)
							Q96HZ4(HES6)										Q99856(ARID3A)
							Q96JQ0(DCHS1)										Q99958(FOXC2)
							Q96KC8(DNAJC1)										Q9BVV2(C20orf195)
							Q96NN9(AIFM3)										Q9BXX0(EMILIN2)
							Q96QB1(DLC1)										Q9BYB4(GNB1L)
							Q99519(NEU1)										Q9BYE9(PCDH24)
							Q99538(LGMN)										Q9BYS1(KRTAP1-5)
							Q99685(MGLL)										Q9BZL3(MST150)
							Q99689(FEZ1)										Q9BZQ8(FAM129A)
							Q99814(EPAS1)										Q9C002(C15orf48)
							Q99856(ARID3A)										Q9H013(ADAM19)
							Q99958(FOXC2)										Q9H0R8(GABARAPL1)
							Q9BPX1(HSD17B14)										Q9H165(BCL11A)
							Q9BXU8(FTHL17)										Q9H1J7(WNT5B)
							Q9BXX0(EMILIN2)										Q9H299(SH3BGRL3)
							Q9BYB4(GNB1L)										Q9H2X6(HIPK2)
							Q9BYE9(PCDH24)										Q9H2X9(SLC12A5)
							Q9BYS1(KRTAP1-5)										Q9H3S1(SEMA4A)
							Q9BZQ8(FAM129A)										Q9HB58(SP110)
							Q9H013(ADAM19)										Q9HCH5(SYTL2)
							Q9H0R8(GABARAPL1)										Q9HCN3(TMEM8)
							Q9H165(BCL11A)										Q9HCQ5(GALNT9)
							Q9H1J7(WNT5B)										Q9HCU0(CD248)
							Q9H1R3(MYLK2)										Q9NPB9(CCRL1)
							Q9H2X6(HIPK2)										Q9NQ30(ESM1)
							Q9H2X9(SLC12A5)										Q9NQ55(PPAN)
							Q9H3S1(SEMA4A)										Q9NQL2(RRAGD)
							Q9H747(SPATA20)										Q9NRA0(DBP)
							Q9HB58(SP110)										Q9NRQ2(PLSCR4)
							Q9HCH5(SYTL2)										Q9NRX5(SERINC1)
							Q9HCN3(TMEM8)										Q9NU53(C6orf72)
							Q9HCQ5(GALNT9)										Q9NVA2()
							Q9HCU0(CD248)										Q9P0I2(TMEM111)
							Q9NPB9(CCRL1)										Q9P2G1(ANKIB1)
							Q9NQ30(ESM1)										Q9UBV2(SEL1L)
							Q9NQ55(PPAN)										Q9UBX5(FBLN5)
							Q9NR99(MXRA5)										Q9UHL4(DPP7)
							Q9NRA0(DBP)										Q9UHQ4(BCAP29)
							Q9NRQ2(PLSCR4)										Q9UI28(METTL11A)
							Q9NRX5(SERINC1)										Q9UKD1(GMEB2)
							Q9NVA2()										Q9UKE5(TNIK)
							Q9NWX5(ASB6)										Q9UKV0(HDAC9)
							Q9NXJ5(PGPEP1)										Q9UMQ6(CAPN11)
							Q9NYS7(WSB2)										Q9UN70(PCDHGC3)
							Q9NZT1(CALML5)										Q9Y4X4(KLF12)
							Q9P2G1(ANKIB1)										Q9Y5K8(ATP6V1D)
							Q9P2P1(KIAA1305)										Q9Y5P4(COL4A3BP)
							Q9UBV2(SEL1L)										Q9Y5R8(TRAPPC1)
							Q9UBX5(FBLN5)										Q9Y5Y5(PEX16)
							Q9UHL4(DPP7)										Q9Y6F6(MRVI1)
							Q9UHQ4(BCAP29)										Q9Y6N5(SQRDL)
							Q9UKD1(GMEB2)
							Q9UKE5(TNIK)
							Q9UKP3(ITGB1BP2)
							Q9UKV0(HDAC9)
							Q9UMQ6(CAPN11)
							Q9UN70(PCDHGC3)
							Q9Y2E5(MAN2B2)
							Q9Y4X4(KLF12)
							Q9Y5K8(ATP6V1D)
							Q9Y5P4(COL4A3BP)
							Q9Y5R8(TRAPPC1)
							Q9Y5Y5(PEX16)

## Sheet: Induced by MYCN
	Biological process terms
GO term ID	GO:0006139	GO:0006259	GO:0006260	GO:0006396	GO:0006412	GO:0007582	GO:0008152	GO:0016070	GO:0043170	GO:0043283	GO:0044237	GO:0044238	GO:0050875	GO:0007049	GO:0007067	GO:0009059	GO:0000087	GO:0006261	GO:0044249	GO:0007046	GO:0000375	GO:0000377	GO:0000398	GO:0000279	GO:0008380	GO:0000278	GO:0009987	GO:0042254	GO:0009058	GO:0016071	GO:0006397	GO:0044260	GO:0006281	GO:0006996	GO:0044267	GO:0006364	GO:0016072	GO:0019538	GO:0007028	GO:0006974	GO:0009719	GO:0006270	GO:0006457	GO:0008150	GO:0051301	GO:0000074	GO:0050794	GO:0007051	GO:0006323
GO term description	nucleobase, nucleoside, nucleotide and nucleic acid metabolism	DNA metabolism	DNA replication	RNA processing	protein biosynthesis	physiological process	metabolism	RNA metabolism	macromolecule metabolism	biopolymer metabolism	cellular metabolism	primary metabolism	cellular physiological process	cell cycle	mitosis	macromolecule biosynthesis	M phase of mitotic cell cycle	DNA-dependent DNA replication	cellular biosynthesis	ribosome biogenesis	RNA splicing, via transesterification reactions	RNA splicing, via transesterification reactions with bulged adenosine as nucleophile	nuclear mRNA splicing, via spliceosome	M phase	RNA splicing	mitotic cell cycle	cellular process	ribosome biogenesis and assembly	biosynthesis	mRNA metabolism	mRNA processing	cellular macromolecule metabolism	DNA repair	organelle organization and biogenesis	cellular protein metabolism	rRNA processing	rRNA metabolism	protein metabolism	cytoplasm organization and biogenesis	response to DNA damage stimulus	response to endogenous stimulus	DNA replication initiation	protein folding	biological_process	cell division	regulation of progression through cell cycle	regulation of cellular process	spindle organization and biogenesis	DNA packaging
P-value (Bonferroni-corrected)	0	0	0	0	0	0	0	0	0	0	0	0	0	2.116e-10	7.365e-10	4.085e-09	1.1e-08	3.296e-08	5.012e-08	5.069e-08	1.36e-07	1.36e-07	1.36e-07	2.214e-07	2.282e-07	2.336e-07	2.405e-07	2.575e-07	8.859e-07	1.828e-06	2.137e-06	2.732e-06	3.178e-06	3.911e-06	4.581e-06	5.432e-06	5.432e-06	7.683e-06	1.468e-05	1.489e-05	5.944e-05	8.871e-05	8.918e-05	0.000173	0.0002499	0.0006492	0.002927	0.005392	0.008053
Member genes	O00148(DDX39)	O00311(CDC7)	O00311(CDC7)	O00148(DDX39)	O15235(MRPS12)	O00148(DDX39)	O00148(DDX39)	O00148(DDX39)	O00148(DDX39)	O00148(DDX39)	O00148(DDX39)	O00148(DDX39)	O00148(DDX39)	O00311(CDC7)	O00762(UBE2C)	O15235(MRPS12)	O00762(UBE2C)	O00311(CDC7)	O15235(MRPS12)	O00567(NOP56)	O00148(DDX39)	O00148(DDX39)	O00148(DDX39)	O00762(UBE2C)	O00148(DDX39)	O00311(CDC7)	O00148(DDX39)	O00567(NOP56)	O15235(MRPS12)	O00148(DDX39)	O00148(DDX39)	O00311(CDC7)	O43502(RAD51C)	O00567(NOP56)	O00311(CDC7)	O00567(NOP56)	O00567(NOP56)	O00311(CDC7)	O00567(NOP56)	O43502(RAD51C)	O43502(RAD51C)	O00311(CDC7)	O43447(PPIH)	O00148(DDX39)	O00311(CDC7)	O00311(CDC7)	O00167(EYA2)	O00762(UBE2C)	O94776(MTA2)
	O00167(EYA2)	O43502(RAD51C)	O43913(ORC5L)	O00567(NOP56)	O15372(EIF3H)	O00167(EYA2)	O00167(EYA2)	O00567(NOP56)	O00311(CDC7)	O00311(CDC7)	O00167(EYA2)	O00167(EYA2)	O00167(EYA2)	O00762(UBE2C)	O14777(NDC80)	O15372(EIF3H)	O14777(NDC80)	O43913(ORC5L)	O15372(EIF3H)	O60832(DKC1)	O43447(PPIH)	O43447(PPIH)	O43447(PPIH)	O14777(NDC80)	O43447(PPIH)	O00762(UBE2C)	O00167(EYA2)	O60832(DKC1)	O15372(EIF3H)	O43447(PPIH)	O43447(PPIH)	O00762(UBE2C)	O60216(RAD21)	O00762(UBE2C)	O00762(UBE2C)	O60832(DKC1)	O60832(DKC1)	O00762(UBE2C)	O60832(DKC1)	O60216(RAD21)	O60216(RAD21)	O43913(ORC5L)	O75607(NPM3)	O00167(EYA2)	O00762(UBE2C)	O00762(UBE2C)	O00311(CDC7)	O14777(NDC80)	O95619(YEATS4)
	O00311(CDC7)	O43913(ORC5L)	O75419(CDC45L)	O43447(PPIH)	O43422(PRKRIR)	O00311(CDC7)	O00311(CDC7)	O43447(PPIH)	O00567(NOP56)	O00567(NOP56)	O00311(CDC7)	O00311(CDC7)	O00311(CDC7)	O14777(NDC80)	O14965(AURKA)	O43422(PRKRIR)	O14965(AURKA)	O75419(CDC45L)	O43422(PRKRIR)	P22087(FBL)	P09012(SNRPA)	P09012(SNRPA)	P09012(SNRPA)	O14965(AURKA)	P07910(HNRNPC)	O14777(NDC80)	O00311(CDC7)	P22087(FBL)	O43422(PRKRIR)	O95639(CPSF4)	O95639(CPSF4)	O14965(AURKA)	O94782(USP1)	O14777(NDC80)	O14965(AURKA)	P22087(FBL)	P22087(FBL)	O14965(AURKA)	P22087(FBL)	O94782(USP1)	O94782(USP1)	O75419(CDC45L)	O95757(HSPA4L)	O00311(CDC7)	O43683(BUB1)	O43683(BUB1)	O00762(UBE2C)	O14965(AURKA)	O96019(ACTL6A)
	O00567(NOP56)	O60216(RAD21)	O75496(GMNN)	O60832(DKC1)	O75822(EIF3J)	O00567(NOP56)	O00567(NOP56)	O60832(DKC1)	O00762(UBE2C)	O00762(UBE2C)	O00567(NOP56)	O00567(NOP56)	O00567(NOP56)	O14965(AURKA)	O43683(BUB1)	O75822(EIF3J)	O43683(BUB1)	O75496(GMNN)	O75822(EIF3J)	P38919(EIF4A3)	P23246(SFPQ)	P23246(SFPQ)	P23246(SFPQ)	O43683(BUB1)	P09012(SNRPA)	O14965(AURKA)	O00567(NOP56)	P38919(EIF4A3)	O75822(EIF3J)	P09012(SNRPA)	P09012(SNRPA)	O15235(MRPS12)	O95997(PTTG1)	O14965(AURKA)	O15235(MRPS12)	P38919(EIF4A3)	P38919(EIF4A3)	O15235(MRPS12)	P38919(EIF4A3)	O95997(PTTG1)	O95997(PTTG1)	P25205(MCM3)	P08238(HSP90AB1)	O00567(NOP56)	O60216(RAD21)	O60832(DKC1)	O14737(PDCD5)	P18754(RCC1)	P16104(H2AFX)
	O14776(TCERG1)	O75419(CDC45L)	P11388(TOP2A)	O75818(RPP40)	P05198(EIF2S1)	O00762(UBE2C)	O00762(UBE2C)	O75818(RPP40)	O14521(SDHD)	O14965(AURKA)	O00762(UBE2C)	O00762(UBE2C)	O00762(UBE2C)	O43683(BUB1)	O60216(RAD21)	P05198(EIF2S1)	O60216(RAD21)	P12004(PCNA)	P05198(EIF2S1)	Q14137(BOP1)	P26368(U2AF2)	P26368(U2AF2)	P26368(U2AF2)	O60216(RAD21)	P09661(SNRPA1)	O43683(BUB1)	O00762(UBE2C)	Q14137(BOP1)	P05198(EIF2S1)	P11940(PABPC1)	P11940(PABPC1)	O15372(EIF3H)	P09874(PARP1)	O60216(RAD21)	O15372(EIF3H)	Q14137(BOP1)	Q14137(BOP1)	O15372(EIF3H)	Q14137(BOP1)	P09874(PARP1)	P09874(PARP1)	P33993(MCM7)	P38646(HSPA9)	O00762(UBE2C)	O95067(CCNB2)	O75419(CDC45L)	O14776(TCERG1)	P33552(CKS2)	P17317(H2AFZ)
	O14867(BACH1)	O75496(GMNN)	P12004(PCNA)	O95639(CPSF4)	P06730(EIF4E)	O14521(SDHD)	O14521(SDHD)	O95639(CPSF4)	O14965(AURKA)	O43447(PPIH)	O14521(SDHD)	O14521(SDHD)	O14521(SDHD)	O60216(RAD21)	O95067(CCNB2)	P06730(EIF4E)	O95067(CCNB2)	P25205(MCM3)	P06730(EIF4E)	Q14978(NOLC1)	Q01081(U2AF1)	Q01081(U2AF1)	Q01081(U2AF1)	O95067(CCNB2)	P23246(SFPQ)	O60216(RAD21)	O14521(SDHD)	Q14978(NOLC1)	P06730(EIF4E)	P23246(SFPQ)	P23246(SFPQ)	O43422(PRKRIR)	P11388(TOP2A)	O60832(DKC1)	O43422(PRKRIR)	Q14978(NOLC1)	Q14978(NOLC1)	O43422(PRKRIR)	Q14978(NOLC1)	P11388(TOP2A)	P11388(TOP2A)	P49736(MCM2)	P40227(CCT6A)	O14521(SDHD)	O95997(PTTG1)	O75496(GMNN)	O14867(BACH1)	P33981(TTK)	P18754(RCC1)
	O15226(NKRF)	O94776(MTA2)	P22303(ACHE)	P07910(HNRNPC)	P07814(EPRS)	O14684(PTGES)	O14684(PTGES)	P07814(EPRS)	O15235(MRPS12)	O43502(RAD51C)	O14684(PTGES)	O14684(PTGES)	O14684(PTGES)	O60832(DKC1)	O95997(PTTG1)	P07814(EPRS)	O95997(PTTG1)	P26583(HMGB2)	P07814(EPRS)	Q15050(RRS1)	Q12972(PPP1R8)	Q12972(PPP1R8)	Q12972(PPP1R8)	O95997(PTTG1)	P26368(U2AF2)	O95067(CCNB2)	O14684(PTGES)	Q15050(RRS1)	P07814(EPRS)	P26368(U2AF2)	P26368(U2AF2)	O43447(PPIH)	P12004(PCNA)	O94776(MTA2)	O43447(PPIH)	Q96B26(EXOSC8)	Q96B26(EXOSC8)	O43447(PPIH)	Q15050(RRS1)	P12004(PCNA)	P12004(PCNA)	Q14566(MCM6)	P48643(CCT5)	O14684(PTGES)	P06493(CDC2)	O95067(CCNB2)	O15226(NKRF)		P26583(HMGB2)
	O15318(POLR3G)	O94782(USP1)	P25205(MCM3)	P09012(SNRPA)	P08708(CCDC127)	O14737(PDCD5)	O14776(TCERG1)	P07910(HNRNPC)	O15372(EIF3H)	O43683(BUB1)	O14776(TCERG1)	O14776(TCERG1)	O14737(PDCD5)	O75419(CDC45L)	P06493(CDC2)	P08708(CCDC127)	P06493(CDC2)	P33993(MCM7)	P08708(CCDC127)	Q92499(DDX1)	Q15029(EFTUD2)	Q15029(EFTUD2)	Q15029(EFTUD2)	P06493(CDC2)	Q01081(U2AF1)	O95997(PTTG1)	O14737(PDCD5)	Q92499(DDX1)	P08238(HSP90AB1)	Q01081(U2AF1)	Q01081(U2AF1)	O43683(BUB1)	P13010(XRCC5)	O95235(KIF20A)	O43683(BUB1)	Q9NX24(NHP2)	Q9NX24(NHP2)	O43683(BUB1)	Q92499(DDX1)	P13010(XRCC5)	P13010(XRCC5)	Q96S55(WRNIP1)	P49368(CCT3)	O14737(PDCD5)	P14635(CCNB1)	P06454(PTMA)	O15318(POLR3G)		P49321(NASP)
	O15347(HMGB3)	O95619(YEATS4)	P26583(HMGB2)	P09661(SNRPA1)	P09001(MRPL3)	O14776(TCERG1)	O14867(BACH1)	P09012(SNRPA)	O43422(PRKRIR)	O43913(ORC5L)	O14867(BACH1)	O14867(BACH1)	O14776(TCERG1)	O75496(GMNN)	P14635(CCNB1)	P09001(MRPL3)	P14635(CCNB1)	P40938(RFC3)	P09001(MRPL3)	Q96B26(EXOSC8)	Q15393(SF3B3)	Q15393(SF3B3)	Q15393(SF3B3)	P14635(CCNB1)	Q12972(PPP1R8)	P06493(CDC2)	O14776(TCERG1)	Q96B26(EXOSC8)	P08708(CCDC127)	Q05048(CSTF1)	Q05048(CSTF1)	O60344(ECE2)	P13051(UNG)	O95619(YEATS4)	O60344(ECE2)	Q9NY12(GAR1)	Q9NY12(GAR1)	O60344(ECE2)	Q96B26(EXOSC8)	P13051(UNG)	P13051(UNG)		P50990(CCT8)	O14776(TCERG1)	P18754(RCC1)	P06493(CDC2)	O15347(HMGB3)		P49450(CENPA)
	O15370(SOX12)	O95997(PTTG1)	P31350(RRM2)	P11940(PABPC1)	P11940(PABPC1)	O14777(NDC80)	O14965(AURKA)	P09661(SNRPA1)	O43447(PPIH)	O60216(RAD21)	O14965(AURKA)	O14965(AURKA)	O14777(NDC80)	O95067(CCNB2)	P18754(RCC1)	P11940(PABPC1)	P18754(RCC1)	P49642(PRIM1)	P11926(ODC1)	Q99848(EBNA1BP2)	Q16629(SFRS7)	Q16629(SFRS7)	Q16629(SFRS7)	P16104(H2AFX)	Q15029(EFTUD2)	P14635(CCNB1)	O14777(NDC80)	Q99848(EBNA1BP2)	P09001(MRPL3)	Q12972(PPP1R8)	Q12972(PPP1R8)	O75607(NPM3)	P16104(H2AFX)	O96019(ACTL6A)	O75607(NPM3)	Q9Y2X3(NOP58)	Q9Y2X3(NOP58)	O75607(NPM3)	Q99848(EBNA1BP2)	P16104(H2AFX)	P16104(H2AFX)		P50991(CCT4)	O14777(NDC80)	P33552(CKS2)	P10145(IL8)	O15370(SOX12)		Q13185(CBX3)
	O43447(PPIH)	O96019(ACTL6A)	P33993(MCM7)	P22087(FBL)	P13639(EEF2)	O14867(BACH1)	O14975(SLC27A2)	P11940(PABPC1)	O43502(RAD51C)	O60344(ECE2)	O14975(SLC27A2)	O14975(SLC27A2)	O14867(BACH1)	O95997(PTTG1)	P33981(TTK)	P13639(EEF2)	P33981(TTK)	P49736(MCM2)	P11940(PABPC1)	Q9BVJ6(UTP14A)	Q86V81(THOC4)	Q86V81(THOC4)	Q86V81(THOC4)	P18754(RCC1)	Q15393(SF3B3)	P18754(RCC1)	O14867(BACH1)	Q9BVJ6(UTP14A)	P11926(ODC1)	Q12996(CSTF3)	Q12996(CSTF3)	O75822(EIF3J)	P23246(SFPQ)	P09341(CXCL1)	O75822(EIF3J)	Q9Y3A2(UTP11L)	Q9Y3A2(UTP11L)	O75822(EIF3J)	Q9BVJ6(UTP14A)	P23246(SFPQ)	P23246(SFPQ)		P78371(CCT2)	O14867(BACH1)	P36873(PPP1CC)	P10244(MYBL2)	O15372(EIF3H)		Q15022(SUZ12)
	O43502(RAD51C)	P01100(FOS)	P39748(FEN1)	P23246(SFPQ)	P18077(RPL35A)	O14925(TIMM23)	O15226(NKRF)	P22087(FBL)	O43683(BUB1)	O60832(DKC1)	O15226(NKRF)	O15226(NKRF)	O14925(TIMM23)	P06454(PTMA)	P43034(PAFAH1B1)	P18077(RPL35A)	P43034(PAFAH1B1)	P52701(MSH6)	P13639(EEF2)	Q9NX24(NHP2)	Q8TEQ6(GEMIN5)	Q8TEQ6(GEMIN5)	Q8TEQ6(GEMIN5)	P33981(TTK)	Q16629(SFRS7)	P33981(TTK)	O14925(TIMM23)	Q9NX24(NHP2)	P11940(PABPC1)	Q15029(EFTUD2)	Q15029(EFTUD2)	O94782(USP1)	P26583(HMGB2)	P16104(H2AFX)	O94782(USP1)			O94782(USP1)	Q9NX24(NHP2)	P26583(HMGB2)	P26583(HMGB2)		Q02790(FKBP4)	O14925(TIMM23)	P43034(PAFAH1B1)	P12004(PCNA)	O15492(RGS16)		Q15910(EZH2)
	O43913(ORC5L)	P09874(PARP1)	P40937(RFC5)	P26368(U2AF2)	P22090(RPS4Y1)	O14965(AURKA)	O15235(MRPS12)	P23246(SFPQ)	O43913(ORC5L)	O75419(CDC45L)	O15235(MRPS12)	O15235(MRPS12)	O14965(AURKA)	P06493(CDC2)	P49454(CENPF)	P22090(RPS4Y1)	P49454(CENPF)	Q14566(MCM6)	P13995(MTHFD2)	Q9NY12(GAR1)	Q92499(DDX1)	Q92499(DDX1)	Q92499(DDX1)	P43034(PAFAH1B1)	Q86V81(THOC4)	P43034(PAFAH1B1)	O14965(AURKA)	Q9NY12(GAR1)	P13639(EEF2)	Q15393(SF3B3)	Q15393(SF3B3)	O95757(HSPA4L)	P27695(APEX1)	P17317(H2AFZ)	O95757(HSPA4L)			O95757(HSPA4L)	Q9NY12(GAR1)	P27695(APEX1)	P27695(APEX1)		Q86V81(THOC4)	O14965(AURKA)	P49454(CENPF)	P14635(CCNB1)	O43422(PRKRIR)		Q16695(HIST3H3)
	O60216(RAD21)	P11388(TOP2A)	P40938(RFC3)	P38919(EIF4A3)	P23396(RPS3)	O14975(SLC27A2)	O15318(POLR3G)	P26368(U2AF2)	O60216(RAD21)	O75496(GMNN)	O15318(POLR3G)	O15318(POLR3G)	O14975(SLC27A2)	P10145(IL8)	P51959(CCNG1)	P23396(RPS3)	P51959(CCNG1)	Q969P6(TOP1MT)	P17812(CTPS)	Q9Y2X3(NOP58)	Q96SB4(SRPK1)	Q96SB4(SRPK1)	Q96SB4(SRPK1)	P49454(CENPF)	Q8TEQ6(GEMIN5)	P49454(CENPF)	O14975(SLC27A2)	Q9Y2X3(NOP58)	P13995(MTHFD2)	Q16629(SFRS7)	Q16629(SFRS7)	P02654(APOC1)	P38398(BRCA1)	P18754(RCC1)	P02654(APOC1)			P02654(APOC1)	Q9Y2X3(NOP58)	P38398(BRCA1)	P38398(BRCA1)		Q8NI60(CABC1)	O14975(SLC27A2)	P51959(CCNG1)	P18754(RCC1)	O43609(SPRY1)		Q92769(HDAC2)
	O60832(DKC1)	P12004(PCNA)	P49005(POLD2)	P52597(HNRNPF)	P26639(TARS)	O15226(NKRF)	O15347(HMGB3)	P26639(TARS)	O60344(ECE2)	O75818(RPP40)	O15347(HMGB3)	O15347(HMGB3)	O15226(NKRF)	P10244(MYBL2)	Q14978(NOLC1)	P26639(TARS)	Q14978(NOLC1)	Q96S55(WRNIP1)	P18077(RPL35A)	Q9Y3A2(UTP11L)	Q9UK45(LSM7)	Q9UK45(LSM7)	Q9UK45(LSM7)	P51959(CCNG1)	Q92499(DDX1)	P51959(CCNG1)	O15226(NKRF)	Q9Y3A2(UTP11L)	P17812(CTPS)	Q86V81(THOC4)	Q86V81(THOC4)	P05198(EIF2S1)	P39748(FEN1)	P22087(FBL)	P05198(EIF2S1)			P05198(EIF2S1)	Q9Y3A2(UTP11L)	P39748(FEN1)	P39748(FEN1)		Q8TAA5(GRPEL2)	O15226(NKRF)	Q15021(NCAPD2)	P33552(CKS2)	O43665(RGS10)		Q92830(KAT2A)
	O75419(CDC45L)	P13010(XRCC5)	P49642(PRIM1)	Q01081(U2AF1)	P32969(RPL9)	O15235(MRPS12)	O15370(SOX12)	P38919(EIF4A3)	O60832(DKC1)	O94776(MTA2)	O15370(SOX12)	O15370(SOX12)	O15235(MRPS12)	P12004(PCNA)	Q15021(NCAPD2)	P32969(RPL9)	Q15021(NCAPD2)	Q96T60(PNKP)	P22090(RPS4Y1)		Q9Y333(LSM2)	Q9Y333(LSM2)	Q9Y333(LSM2)	Q14978(NOLC1)	Q96SB4(SRPK1)	Q14978(NOLC1)	O15235(MRPS12)		P18077(RPL35A)	Q8TEQ6(GEMIN5)	Q8TEQ6(GEMIN5)	P06493(CDC2)	P40937(RFC5)	P26583(HMGB2)	P06493(CDC2)			P06493(CDC2)		P40937(RFC5)	P40937(RFC5)		Q92598(HSPH1)	O15235(MRPS12)	Q8IZT6(ASPM)	P33981(TTK)	O43683(BUB1)		Q92922(SMARCC1)
	O75496(GMNN)	P13051(UNG)	P49736(MCM2)	Q05048(CSTF1)	P35268(RPL22)	O15263(DEFB4)	O15372(EIF3H)	P52597(HNRNPF)	O75419(CDC45L)	O94782(USP1)	O15372(EIF3H)	O15372(EIF3H)	O15318(POLR3G)	P14635(CCNB1)	Q8IZT6(ASPM)	P35268(RPL22)	Q8IZT6(ASPM)		P22102(GART)		Q9Y3B4(SF3B14)	Q9Y3B4(SF3B14)	Q9Y3B4(SF3B14)	Q15021(NCAPD2)	Q9UK45(LSM7)	Q15021(NCAPD2)	O15263(DEFB4)		P22090(RPS4Y1)	Q92499(DDX1)	Q92499(DDX1)	P06730(EIF4E)	P52701(MSH6)	P33552(CKS2)	P06730(EIF4E)			P06730(EIF4E)		P52701(MSH6)	P52701(MSH6)		Q96DA6(DNAJC19)	O15263(DEFB4)	Q96FF9(CDCA5)	P38398(BRCA1)	O60344(ECE2)		Q9H9B1(EHMT1)
	O75818(RPP40)	P16104(H2AFX)	P52701(MSH6)	Q12934(BFSP1)	P39023(RPL3)	O15318(POLR3G)	O43422(PRKRIR)	Q01081(U2AF1)	O75496(GMNN)	O95619(YEATS4)	O43422(PRKRIR)	O43422(PRKRIR)	O15347(HMGB3)	P16104(H2AFX)	Q96FF9(CDCA5)	P39023(RPL3)	Q96FF9(CDCA5)		P22234(PAICS)		Q9Y4Y9(LSM5)	Q9Y4Y9(LSM5)	Q9Y4Y9(LSM5)	Q8IZT6(ASPM)	Q9Y333(LSM2)	Q16667(CDKN3)	O15318(POLR3G)		P22102(GART)	Q96SB4(SRPK1)	Q96SB4(SRPK1)	P06737(PYGL)	P54132(BLM)	P33981(TTK)	P07814(EPRS)			P07814(EPRS)		P54132(BLM)	P54132(BLM)		Q96EY1(DNAJA3)	O15318(POLR3G)	Q9H1A4(ANAPC1)	P42771(CDKN2A)	O60832(DKC1)		Q9Y265(RUVBL1)
	O94776(MTA2)	P17317(H2AFZ)	P54132(BLM)	Q12972(PPP1R8)	P42766(RPL35)	O15347(HMGB3)	O43447(PPIH)	Q05048(CSTF1)	O75607(NPM3)	O95639(CPSF4)	O43447(PPIH)	O43447(PPIH)	O15370(SOX12)	P18754(RCC1)	Q96KB5(PBK)	P42766(RPL35)	Q96KB5(PBK)		P23396(RPS3)					Q96FF9(CDCA5)	Q9Y3B4(SF3B14)	Q8IZT6(ASPM)	O15347(HMGB3)		P22234(PAICS)	Q9H361(PABPC3)	Q9UK45(LSM7)	P07814(EPRS)	Q13535(ATR)	P38398(BRCA1)	P08238(HSP90AB1)			P08238(HSP90AB1)		Q13535(ATR)	Q13535(ATR)		Q9NQP4(PFDN4)	O15347(HMGB3)		P46087(NOP2)	O60894(RAMP1)
	O94782(USP1)	P18754(RCC1)	Q04837(SSBP1)	Q12996(CSTF3)	P46777(RPL5)	O15370(SOX12)	O43502(RAD51C)	Q12934(BFSP1)	O75818(RPP40)	O95997(PTTG1)	O43502(RAD51C)	O43502(RAD51C)	O15372(EIF3H)	P23919(DTYMK)	Q96Q89(KIF20B)	P46777(RPL5)	Q96Q89(KIF20B)		P23919(DTYMK)					Q96KB5(PBK)	Q9Y4Y9(LSM5)	Q96FF9(CDCA5)	O15370(SOX12)		P23396(RPS3)	Q9NPI6(DCP1A)	Q9Y333(LSM2)	P08238(HSP90AB1)	Q96S55(WRNIP1)	P38919(EIF4A3)	P08708(CCDC127)			P08708(CCDC127)		Q96S55(WRNIP1)	Q96S55(WRNIP1)		Q9NZJ4(SACS)	O15370(SOX12)		P49454(CENPF)	O75419(CDC45L)
	O95619(YEATS4)	P22303(ACHE)	Q12857(NFIA)	Q14103(HNRNPD)	P46778(RPL21)	O15372(EIF3H)	O43683(BUB1)	Q12972(PPP1R8)	O75822(EIF3J)	O96019(ACTL6A)	O43683(BUB1)	O43683(BUB1)	O43422(PRKRIR)	P25205(MCM3)	Q99661(KIF2C)	P46778(RPL21)	Q99661(KIF2C)		P24539(ATP5F1)					Q96Q89(KIF20B)		Q96KB5(PBK)	O15372(EIF3H)		P23919(DTYMK)	Q9UK45(LSM7)	Q9Y3B4(SF3B14)	P08708(CCDC127)	Q96T60(PNKP)	P43034(PAFAH1B1)	P09001(MRPL3)			P09001(MRPL3)		Q96T60(PNKP)	Q96T60(PNKP)		Q9P0X2(HSPA14)	O15372(EIF3H)		P50991(CCT4)	O75496(GMNN)
	O95639(CPSF4)	P23246(SFPQ)	Q14566(MCM6)	Q14137(BOP1)	P46782(RPS5)	O15492(RGS16)	O43913(ORC5L)	Q12996(CSTF3)	O94776(MTA2)	P01100(FOS)	O43913(ORC5L)	O43913(ORC5L)	O43447(PPIH)	P33552(CKS2)	Q9H1A4(ANAPC1)	P46782(RPS5)	Q9H1A4(ANAPC1)		P26639(TARS)					Q99661(KIF2C)		Q96Q89(KIF20B)	O15492(RGS16)		P24539(ATP5F1)	Q9Y333(LSM2)	Q9Y4Y9(LSM5)	P09001(MRPL3)	Q96T88(UHRF1)	P49450(CENPA)	P09874(PARP1)			P09874(PARP1)		Q96T88(UHRF1)	Q96T88(UHRF1)		Q9UHV9(PFDN2)	O15492(RGS16)		P51959(CCNG1)	O75822(EIF3J)
	O95997(PTTG1)	P23919(DTYMK)	Q969P6(TOP1MT)	Q14978(NOLC1)	P47914(RPL29)	O43422(PRKRIR)	O60216(RAD21)	Q14103(HNRNPD)	O94782(USP1)	P06493(CDC2)	O60216(RAD21)	O60216(RAD21)	O43502(RAD51C)	P33981(TTK)	Q9ULW0(TPX2)	P47914(RPL29)	Q9ULW0(TPX2)		P27708(CAD)					Q9H1A4(ANAPC1)		Q99661(KIF2C)	O43422(PRKRIR)		P26639(TARS)	Q9Y3B4(SF3B14)		P09874(PARP1)	Q9UGN5(PARP2)	Q13185(CBX3)	P11801(PSKH1)			P11801(PSKH1)		Q9UGN5(PARP2)	Q9UGN5(PARP2)		Q9UKB3(DNAJC12)	O43422(PRKRIR)		P78371(CCT2)	O76036(NCR1)
	O96019(ACTL6A)	P25205(MCM3)	Q96RR1(C10orf2)	Q15029(EFTUD2)	P49207(RPL34)	O43447(PPIH)	O60344(ECE2)	Q14137(BOP1)	O95619(YEATS4)	P06737(PYGL)	O60344(ECE2)	O60344(ECE2)	O43592(XPOT)	P33993(MCM7)		P49207(RPL34)			P32969(RPL9)					Q9ULW0(TPX2)		Q9H1A4(ANAPC1)	O43447(PPIH)		P27708(CAD)	Q9Y4Y9(LSM5)		P10253(GAA)		Q14103(HNRNPD)	P11940(PABPC1)			P11940(PABPC1)					Q9Y237(RPS4X)	O43447(PPIH)		Q13535(ATR)	O94776(MTA2)
	P00492(HPRT1)	P26358(DNMT1)	Q96S55(WRNIP1)	Q15393(SF3B3)	P49406(MRPL19)	O43502(RAD51C)	O60832(DKC1)	Q14978(NOLC1)	O95639(CPSF4)	P07814(EPRS)	O60832(DKC1)	O60832(DKC1)	O43683(BUB1)	P36873(PPP1CC)		P49406(MRPL19)			P35268(RPL22)							Q9ULW0(TPX2)	O43502(RAD51C)		P32969(RPL9)			P11801(PSKH1)		Q14137(BOP1)	P12931(SRC)			P12931(SRC)						O43502(RAD51C)		Q14106(TOB2)	O95067(CCNB2)
	P01100(FOS)	P26583(HMGB2)	Q96T60(PNKP)	Q16629(SFRS7)	P49411(TUFM)	O43592(XPOT)	O75419(CDC45L)	Q15029(EFTUD2)	O95757(HSPA4L)	P07910(HNRNPC)	O75419(CDC45L)	O75419(CDC45L)	O43913(ORC5L)	P38398(BRCA1)		P49411(TUFM)			P35520(CBS)								O43592(XPOT)		P35268(RPL22)			P11940(PABPC1)		Q14978(NOLC1)	P13500(CCL2)			P13500(CCL2)						O43592(XPOT)		Q14186(TFDP1)	O95619(YEATS4)
	P06454(PTMA)	P27695(APEX1)	Q9NRF9(POLE3)	Q86V81(THOC4)	P50914(RPL14)	O43683(BUB1)	O75496(GMNN)	Q15393(SF3B3)	O95997(PTTG1)	P09012(SNRPA)	O75496(GMNN)	O75496(GMNN)	O60216(RAD21)	P41220(RGS2)		P50914(RPL14)			P39023(RPL3)								O43609(SPRY1)		P35520(CBS)			P12931(SRC)		Q15021(NCAPD2)	P13639(EEF2)			P13639(EEF2)						O43609(SPRY1)		Q15329(E2F5)	O96019(ACTL6A)
	P07814(EPRS)	P31350(RRM2)		Q8TEQ6(GEMIN5)	P52758(HRSP12)	O43913(ORC5L)	O75607(NPM3)	Q15717(ELAVL1)	O96019(ACTL6A)	P09661(SNRPA1)	O75607(NPM3)	O75607(NPM3)	O60344(ECE2)	P42771(CDKN2A)		P52758(HRSP12)			P42766(RPL35)								O43665(RGS10)		P39023(RPL3)			P13500(CCL2)		Q15022(SUZ12)	P14373(TRIM27)			P14373(TRIM27)						O43665(RGS10)		Q16667(CDKN3)	P01100(FOS)
	P07910(HNRNPC)	P33993(MCM7)		Q92499(DDX1)	Q02543(RPL18A)	O60216(RAD21)	O75608(LYPLA1)	Q16629(SFRS7)	P01100(FOS)	P09874(PARP1)	O75608(LYPLA1)	O75608(LYPLA1)	O60832(DKC1)	P43034(PAFAH1B1)		Q02543(RPL18A)			P46777(RPL5)								O43683(BUB1)		P42766(RPL35)			P13639(EEF2)		Q15050(RRS1)	P16104(H2AFX)			P16104(H2AFX)						O43683(BUB1)		Q96Q89(KIF20B)	P05198(EIF2S1)
	P09012(SNRPA)	P38398(BRCA1)		Q96B26(EXOSC8)	Q02878(RPL6)	O60344(ECE2)	O75818(RPP40)	Q86V81(THOC4)	P02654(APOC1)	P10253(GAA)	O75818(RPP40)	O75818(RPP40)	O60894(RAMP1)	P46087(NOP2)		Q02878(RPL6)			P46778(RPL21)								O43913(ORC5L)		P46777(RPL5)			P14373(TRIM27)		Q15910(EZH2)	P16591(FER)			P16591(FER)						O43715(TRIAP1)		Q9H1A4(ANAPC1)	P06454(PTMA)
	P09661(SNRPA1)	P39748(FEN1)		Q96PZ0(PUS7)	Q07020(RPL18)	O60832(DKC1)	O75822(EIF3J)	Q8TEQ6(GEMIN5)	P05198(EIF2S1)	P11388(TOP2A)	O75822(EIF3J)	O75822(EIF3J)	O75330(HMMR)	P49454(CENPF)		Q07020(RPL18)			P46782(RPS5)								O60216(RAD21)		P46778(RPL21)			P16104(H2AFX)		Q16695(HIST3H3)	P17317(H2AFZ)			P17317(H2AFZ)						O43913(ORC5L)		Q9P288(BCCIP)	P06493(CDC2)
	P09874(PARP1)	P40937(RFC5)		Q96SB4(SRPK1)	Q10472(GALNT1)	O60894(RAMP1)	O94776(MTA2)	Q92499(DDX1)	P06493(CDC2)	P11801(PSKH1)	O94776(MTA2)	O94776(MTA2)	O75419(CDC45L)	P49736(MCM2)		Q10472(GALNT1)			P47914(RPL29)								O60344(ECE2)		P46782(RPS5)			P16591(FER)		Q92499(DDX1)	P18077(RPL35A)			P18077(RPL35A)						O60216(RAD21)		Q9UL69(C13orf15)	P06730(EIF4E)
	P10244(MYBL2)	P40938(RFC3)		Q99575(POP1)	Q15029(EFTUD2)	O75330(HMMR)	O94782(USP1)	Q96B26(EXOSC8)	P06730(EIF4E)	P11940(PABPC1)	O94782(USP1)	O94782(USP1)	O75474(FRAT2)	P50991(CCT4)		Q15029(EFTUD2)			P49207(RPL34)								O60832(DKC1)		P47914(RPL29)			P17317(H2AFZ)		Q92769(HDAC2)	P22090(RPS4Y1)			P22090(RPS4Y1)						O60344(ECE2)		Q9UQ80(PA2G4)	P09341(CXCL1)
	P11161(EGR2)	P49005(POLD2)		Q9NX24(NHP2)	Q15056(EIF4H)	O75419(CDC45L)	O95619(YEATS4)	Q96PZ0(PUS7)	P06737(PYGL)	P12004(PCNA)	O95619(YEATS4)	O95619(YEATS4)	O75496(GMNN)	P51959(CCNG1)		Q15056(EIF4H)			P49406(MRPL19)								O60883(GPR37L1)		P49207(RPL34)			P18077(RPL35A)		Q92830(KAT2A)	P22303(ACHE)			P22303(ACHE)						O60832(DKC1)			P10145(IL8)
	P11388(TOP2A)	P49321(NASP)		Q9NY12(GAR1)	Q8TBR1(RPS2P32)	O75474(FRAT2)	O95639(CPSF4)	Q96SB4(SRPK1)	P07195(LDHB)	P12931(SRC)	O95639(CPSF4)	O95639(CPSF4)	O75607(NPM3)	P78371(CCT2)		Q8TBR1(RPS2P32)			P49411(TUFM)								O60894(RAMP1)		P49406(MRPL19)			P22090(RPS4Y1)		Q92922(SMARCC1)	P23396(RPS3)			P23396(RPS3)						O60883(GPR37L1)			P10244(MYBL2)
	P11474(ESRRA)	P49450(CENPA)		Q9UBP6(METTL1)	Q92499(DDX1)	O75496(GMNN)	O95757(HSPA4L)	Q99575(POP1)	P07814(EPRS)	P13010(XRCC5)	O95757(HSPA4L)	O95757(HSPA4L)	O75608(LYPLA1)	Q13535(ATR)		Q92499(DDX1)			P50914(RPL14)								O75330(HMMR)		P49411(TUFM)			P22303(ACHE)		Q96B26(EXOSC8)	P24347(MMP11)			P24347(MMP11)						O60894(RAMP1)			P11161(EGR2)
	P11940(PABPC1)	P49642(PRIM1)		Q9UK45(LSM7)	Q96E11(MRRF)	O75607(NPM3)	O95997(PTTG1)	Q9H361(PABPC3)	P07910(HNRNPC)	P13051(UNG)	O95997(PTTG1)	O95997(PTTG1)	O75818(RPP40)	Q13564(NAE1)		Q96E11(MRRF)			P52758(HRSP12)								O75419(CDC45L)		P50914(RPL14)			P23396(RPS3)		Q96Q89(KIF20B)	P25789(PSMA4)			P25789(PSMA4)						O75330(HMMR)			P11474(ESRRA)
	P12004(PCNA)	P49736(MCM2)		Q9Y2X3(NOP58)	Q96GC5(MRPL48)	O75608(LYPLA1)	O96019(ACTL6A)	Q9NPI6(DCP1A)	P08238(HSP90AB1)	P13500(CCL2)	O96019(ACTL6A)	O96019(ACTL6A)	O75822(EIF3J)	Q14106(TOB2)		Q96GC5(MRPL48)			P54886(ALDH18A1)								O75474(FRAT2)		P52758(HRSP12)			P24347(MMP11)		Q96S53(TOE1)	P26583(HMGB2)			P26583(HMGB2)						O75419(CDC45L)			P11940(PABPC1)
	P13010(XRCC5)	P52701(MSH6)		Q9Y333(LSM2)	Q9BPZ3()	O75818(RPP40)	P00492(HPRT1)	Q9NSD9(FARSB)	P08708(CCDC127)	P14373(TRIM27)	P00492(HPRT1)	P00492(HPRT1)	O76036(NCR1)	Q14186(TFDP1)		Q9BPZ3()			Q02543(RPL18A)								O75496(GMNN)		P54886(ALDH18A1)			P25789(PSMA4)		Q99661(KIF2C)	P26639(TARS)			P26639(TARS)						O75474(FRAT2)			P12004(PCNA)
	P13051(UNG)	P54132(BLM)		Q9Y3A2(UTP11L)	Q9BRJ2(MRPL45)	O75822(EIF3J)	P01100(FOS)	Q9NX24(NHP2)	P09001(MRPL3)	P16104(H2AFX)	P01100(FOS)	P01100(FOS)	O94776(MTA2)	Q14566(MCM6)		Q9BRJ2(MRPL45)			Q02878(RPL6)								O75607(NPM3)		Q02543(RPL18A)			P26583(HMGB2)		Q99848(EBNA1BP2)	P32969(RPL9)			P32969(RPL9)						O75496(GMNN)			P13500(CCL2)
	P13682(ZNF35)	Q02880(TOP2B)		Q9Y3B4(SF3B14)	Q9BYD1(MRPL13)	O76036(NCR1)	P02654(APOC1)	Q9NY12(GAR1)	P09012(SNRPA)	P16591(FER)	P02654(APOC1)	P02654(APOC1)	O94782(USP1)	Q14978(NOLC1)		Q9BYD1(MRPL13)			Q06055(ATP5G2)								O75608(LYPLA1)		Q02878(RPL6)			P26639(TARS)		Q9BVJ6(UTP14A)	P33981(TTK)			P33981(TTK)						O75607(NPM3)			P13682(ZNF35)
	P14373(TRIM27)	Q04837(SSBP1)		Q9Y4Y9(LSM5)	Q9H0Y1(MRPL15)	O94776(MTA2)	P05090(APOD)	Q9P2J5(LARS)	P09661(SNRPA1)	P17317(H2AFZ)	P05198(EIF2S1)	P05090(APOD)	O95067(CCNB2)	Q15021(NCAPD2)		Q9H0Y1(MRPL15)			Q06203(PPAT)								O75818(RPP40)		Q06055(ATP5G2)			P32969(RPL9)		Q9H9B1(EHMT1)	P35268(RPL22)			P35268(RPL22)						O75608(LYPLA1)			P14373(TRIM27)
	P15923(TCF3)	Q12857(NFIA)			Q9HD33(MRPL47)	O94782(USP1)	P05198(EIF2S1)	Q9UBP6(METTL1)	P09874(PARP1)	P18754(RCC1)	P06454(PTMA)	P05198(EIF2S1)	O95235(KIF20A)	Q15329(E2F5)		Q9HD33(MRPL47)			Q07020(RPL18)								O75822(EIF3J)		Q06203(PPAT)			P33981(TTK)		Q9NX24(NHP2)	P38398(BRCA1)			P38398(BRCA1)						O75818(RPP40)			P14635(CCNB1)
	P16104(H2AFX)	Q13185(CBX3)			Q9NRL5(MRPL1)	O95067(CCNB2)	P06454(PTMA)	Q9UK45(LSM7)	P10253(GAA)	P22087(FBL)	P06493(CDC2)	P06454(PTMA)	O95619(YEATS4)	Q15398(DLGAP5)		Q9NRL5(MRPL1)			Q10472(GALNT1)								O76036(NCR1)		Q07020(RPL18)			P35268(RPL22)		Q9NY12(GAR1)	P38646(HSPA9)			P38646(HSPA9)						O75822(EIF3J)			P15923(TCF3)
	P16383(C2orf3)	Q13535(ATR)			Q9NSD9(FARSB)	O95235(KIF20A)	P06493(CDC2)	Q9Y2X3(NOP58)	P10515(DLAT)	P22303(ACHE)	P06730(EIF4E)	P06493(CDC2)	O95639(CPSF4)	Q16667(CDKN3)		Q9NSD9(FARSB)			Q15029(EFTUD2)								O94776(MTA2)		Q10472(GALNT1)			P36873(PPP1CC)		Q9Y265(RUVBL1)	P39023(RPL3)			P39023(RPL3)						O76036(NCR1)			P16383(C2orf3)
	P17317(H2AFZ)	Q14566(MCM6)			Q9P2J5(LARS)	O95619(YEATS4)	P06730(EIF4E)	Q9Y333(LSM2)	P11388(TOP2A)	P23246(SFPQ)	P06737(PYGL)	P06730(EIF4E)	O95757(HSPA4L)	Q8IZT6(ASPM)		Q9P2J5(LARS)			Q15056(EIF4H)								O94782(USP1)		Q15029(EFTUD2)			P38398(BRCA1)		Q9Y2X3(NOP58)	P40227(CCT6A)			P40227(CCT6A)						O94776(MTA2)			P18146(EGR1)
	P17812(CTPS)	Q15022(SUZ12)			Q9UJA5(TRMT6)	O95639(CPSF4)	P06737(PYGL)	Q9Y3A2(UTP11L)	P11801(PSKH1)	P23919(DTYMK)	P07195(LDHB)	P06737(PYGL)	O95997(PTTG1)	Q96FF9(CDCA5)		Q9UJA5(TRMT6)			Q8IVG1(SMEK1)								O95067(CCNB2)		Q15056(EIF4H)			P38646(HSPA9)		Q9Y3A2(UTP11L)	P42766(RPL35)			P42766(RPL35)						O94782(USP1)			P18754(RCC1)
	P18146(EGR1)	Q15910(EZH2)			Q9UNX3(RPL26L1)	O95757(HSPA4L)	P07195(LDHB)	Q9Y3B4(SF3B14)	P11940(PABPC1)	P24347(MMP11)	P07814(EPRS)	P07195(LDHB)	O96019(ACTL6A)	Q96KB5(PBK)		Q9UNX3(RPL26L1)			Q8TBR1(RPS2P32)								O95235(KIF20A)		Q8IVG1(SMEK1)			P39023(RPL3)		Q9Y5J7(TIMM9)	P46777(RPL5)			P46777(RPL5)						O95067(CCNB2)			P18847(ATF3)
	P18754(RCC1)	Q16695(HIST3H3)			Q9Y399(MRPS2)	O95997(PTTG1)	P07814(EPRS)	Q9Y4Y9(LSM5)	P12004(PCNA)	P25205(MCM3)	P07910(HNRNPC)	P07814(EPRS)	P00492(HPRT1)	Q96Q89(KIF20B)		Q9Y399(MRPS2)			Q92499(DDX1)								O95619(YEATS4)		Q8TBR1(RPS2P32)			P40227(CCT6A)		Q9Y5L4(TIMM13)	P46778(RPL21)			P46778(RPL21)						O95235(KIF20A)			P22736(NR4A1)
	P18847(ATF3)	Q92769(HDAC2)			Q9Y3U8(RPL36)	O96019(ACTL6A)	P07910(HNRNPC)		P12931(SRC)	P25789(PSMA4)	P07919(UQCRH)	P07910(HNRNPC)	P01100(FOS)	Q96T88(UHRF1)		Q9Y3U8(RPL36)			Q96E11(MRRF)								O95639(CPSF4)		Q92499(DDX1)			P42766(RPL35)		Q9Y613(FHOD1)	P46782(RPS5)			P46782(RPS5)						O95619(YEATS4)			P23246(SFPQ)
	P22087(FBL)	Q92830(KAT2A)			Q9Y6G3(MRPL42)	P00492(HPRT1)	P07919(UQCRH)		P13010(XRCC5)	P26358(DNMT1)	P08238(HSP90AB1)	P08238(HSP90AB1)	P02654(APOC1)	Q99661(KIF2C)		Q9Y6G3(MRPL42)			Q96GC5(MRPL48)								O95757(HSPA4L)		Q96E11(MRRF)			P46777(RPL5)		Q9Y6Y8(SEC23IP)	P47914(RPL29)			P47914(RPL29)						O95639(CPSF4)			P23497(SP100)
	P22102(GART)	Q92922(SMARCC1)				P01100(FOS)	P08238(HSP90AB1)		P13051(UNG)	P26368(U2AF2)	P08574(CYC1)	P08708(CCDC127)	P05090(APOD)	Q9H1A4(ANAPC1)					Q9BPZ3()								O95997(PTTG1)		Q96GC5(MRPL48)			P46778(RPL21)			P48147(PREP)			P48147(PREP)						O95757(HSPA4L)			P25205(MCM3)
	P22234(PAICS)	Q969P6(TOP1MT)				P02654(APOC1)	P08574(CYC1)		P13500(CCL2)	P26583(HMGB2)	P08708(CCDC127)	P09001(MRPL3)	P05198(EIF2S1)	Q9P288(BCCIP)					Q9BRJ2(MRPL45)								O96019(ACTL6A)		Q9BPZ3()			P46782(RPS5)			P48643(CCT5)			P48643(CCT5)						O95997(PTTG1)			P26358(DNMT1)
	P22303(ACHE)	Q96RR1(C10orf2)				P05090(APOD)	P08708(CCDC127)		P13639(EEF2)	P26639(TARS)	P09001(MRPL3)	P09012(SNRPA)	P06454(PTMA)	Q9P2N5(RBM27)					Q9BYD1(MRPL13)								P00492(HPRT1)		Q9BRJ2(MRPL45)			P47914(RPL29)			P49207(RPL34)			P49207(RPL34)						O96019(ACTL6A)			P26583(HMGB2)
	P22736(NR4A1)	Q96S55(WRNIP1)				P05198(EIF2S1)	P09001(MRPL3)		P14373(TRIM27)	P27695(APEX1)	P09012(SNRPA)	P09661(SNRPA1)	P06493(CDC2)	Q9UL69(C13orf15)					Q9H0Y1(MRPL15)								P01100(FOS)		Q9BYD1(MRPL13)			P48147(PREP)			P49368(CCT3)			P49368(CCT3)						P00492(HPRT1)			P28360(MSX1)
	P23246(SFPQ)	Q96T60(PNKP)				P06454(PTMA)	P09012(SNRPA)		P16104(H2AFX)	P31350(RRM2)	P09661(SNRPA1)	P09874(PARP1)	P06730(EIF4E)	Q9ULW0(TPX2)					Q9HD33(MRPL47)								P01210(PENK)		Q9BZX2(UCK2)			P48643(CCT5)			P49406(MRPL19)			P49406(MRPL19)						P01100(FOS)			P31249(HOXD3)
	P23497(SP100)	Q96T88(UHRF1)				P06493(CDC2)	P09661(SNRPA1)		P16591(FER)	P33981(TTK)	P09874(PARP1)	P10244(MYBL2)	P06737(PYGL)	Q9UQ80(PA2G4)					Q9NRL5(MRPL1)								P02654(APOC1)		Q9H0Y1(MRPL15)			P49207(RPL34)			P49411(TUFM)			P49411(TUFM)						P01210(PENK)			P33552(CKS2)
	P23919(DTYMK)	Q9H9B1(EHMT1)				P06730(EIF4E)	P09874(PARP1)		P17317(H2AFZ)	P33993(MCM7)	P10244(MYBL2)	P10253(GAA)	P07195(LDHB)						Q9NSD9(FARSB)								P05090(APOD)		Q9HD33(MRPL47)			P49368(CCT3)			P49450(CENPA)			P49450(CENPA)						P02654(APOC1)			P33981(TTK)
	P24539(ATP5F1)	Q9NRF9(POLE3)				P06737(PYGL)	P10244(MYBL2)		P18077(RPL35A)	P36873(PPP1CC)	P10253(GAA)	P10515(DLAT)	P07814(EPRS)						Q9P2J5(LARS)								P05198(EIF2S1)		Q9NRL5(MRPL1)			P49406(MRPL19)			P50897(PPT1)			P50897(PPT1)						P05090(APOD)			P33993(MCM7)
	P25205(MCM3)	Q9UGN5(PARP2)				P07195(LDHB)	P10253(GAA)		P18754(RCC1)	P38398(BRCA1)	P10515(DLAT)	P11161(EGR2)	P07910(HNRNPC)						Q9UBK8(MTRR)								P06454(PTMA)		Q9NSD9(FARSB)			P49411(TUFM)			P50914(RPL14)			P50914(RPL14)						P05198(EIF2S1)			P38398(BRCA1)
	P26358(DNMT1)	Q9Y265(RUVBL1)				P07814(EPRS)	P10515(DLAT)		P22087(FBL)	P38919(EIF4A3)	P11161(EGR2)	P11388(TOP2A)	P07919(UQCRH)						Q9UJA5(TRMT6)								P06493(CDC2)		Q9P2J5(LARS)			P49450(CENPA)			P50990(CCT8)			P50990(CCT8)						P05452(CLEC3B)			P41220(RGS2)
	P26368(U2AF2)					P07910(HNRNPC)	P11161(EGR2)		P22090(RPS4Y1)	P39748(FEN1)	P11388(TOP2A)	P11474(ESRRA)	P08238(HSP90AB1)						Q9UNX3(RPL26L1)								P06730(EIF4E)		Q9UBK8(MTRR)			P50897(PPT1)			P50991(CCT4)			P50991(CCT4)						P06454(PTMA)			P42771(CDKN2A)
	P26583(HMGB2)					P07919(UQCRH)	P11388(TOP2A)		P22303(ACHE)	P40937(RFC5)	P11474(ESRRA)	P11801(PSKH1)	P08574(CYC1)						Q9Y399(MRPS2)								P06737(PYGL)		Q9UJA2(CRLS1)			P50914(RPL14)			P52758(HRSP12)			P52758(HRSP12)						P06493(CDC2)			P43268(ETV4)
	P26639(TARS)					P08174(CD55)	P11474(ESRRA)		P23246(SFPQ)	P40938(RFC3)	P11801(PSKH1)	P11926(ODC1)	P08708(CCDC127)						Q9Y3U8(RPL36)								P07195(LDHB)		Q9UJA5(TRMT6)			P50990(CCT8)			P52888(THOP1)			P52888(THOP1)						P06730(EIF4E)			P46087(NOP2)
	P27144(AK3L1)					P08238(HSP90AB1)	P11801(PSKH1)		P23396(RPS3)	P49005(POLD2)	P11926(ODC1)	P11940(PABPC1)	P09001(MRPL3)						Q9Y617(PSAT1)								P07814(EPRS)		Q9UNX3(RPL26L1)			P50991(CCT4)			P78371(CCT2)			P78371(CCT2)						P06737(PYGL)			P49454(CENPF)
	P27695(APEX1)					P08574(CYC1)	P11926(ODC1)		P23919(DTYMK)	P49321(NASP)	P11940(PABPC1)	P12004(PCNA)	P09012(SNRPA)						Q9Y6G3(MRPL42)								P07910(HNRNPC)		Q9Y399(MRPS2)			P52758(HRSP12)			Q02543(RPL18A)			Q02543(RPL18A)						P07195(LDHB)			P49736(MCM2)
	P27708(CAD)					P08708(CCDC127)	P11940(PABPC1)		P24347(MMP11)	P49450(CENPA)	P12004(PCNA)	P12931(SRC)	P09341(CXCL1)														P07919(UQCRH)		Q9Y3U8(RPL36)			P52888(THOP1)			Q02790(FKBP4)			Q02790(FKBP4)						P07814(EPRS)			P50991(CCT4)
	P28360(MSX1)					P09001(MRPL3)	P12004(PCNA)		P25205(MCM3)	P49642(PRIM1)	P12931(SRC)	P13010(XRCC5)	P09661(SNRPA1)														P08238(HSP90AB1)		Q9Y617(PSAT1)			P78371(CCT2)			Q02878(RPL6)			Q02878(RPL6)						P07910(HNRNPC)			P51959(CCNG1)
	P31249(HOXD3)					P09012(SNRPA)	P12931(SRC)		P25789(PSMA4)	P49736(MCM2)	P13010(XRCC5)	P13051(UNG)	P09874(PARP1)														P08574(CYC1)		Q9Y6G3(MRPL42)			Q02543(RPL18A)			Q05923(DUSP2)			Q05923(DUSP2)						P07919(UQCRH)			P52758(HRSP12)
	P31350(RRM2)					P09341(CXCL1)	P13010(XRCC5)		P26358(DNMT1)	P50897(PPT1)	P13051(UNG)	P13500(CCL2)	P10145(IL8)														P08708(CCDC127)					Q02790(FKBP4)			Q07020(RPL18)			Q07020(RPL18)						P08174(CD55)			P53567(CEBPG)
	P33993(MCM7)					P09661(SNRPA1)	P13051(UNG)		P26368(U2AF2)	P52597(HNRNPF)	P13500(CCL2)	P13639(EEF2)	P10244(MYBL2)														P09001(MRPL3)					Q02878(RPL6)			Q10472(GALNT1)			Q10472(GALNT1)						P08238(HSP90AB1)			P54198(HIRA)
	P38398(BRCA1)					P09874(PARP1)	P13500(CCL2)		P26583(HMGB2)	P52701(MSH6)	P13639(EEF2)	P13682(ZNF35)	P10253(GAA)														P09012(SNRPA)					Q05923(DUSP2)			Q13564(NAE1)			Q13564(NAE1)						P08574(CYC1)			P78371(CCT2)
	P38919(EIF4A3)					P10145(IL8)	P13639(EEF2)		P26639(TARS)	P54132(BLM)	P13682(ZNF35)	P14373(TRIM27)	P10515(DLAT)														P09341(CXCL1)					Q07020(RPL18)			Q13867(BLMH)			Q13867(BLMH)						P08708(CCDC127)			Q01658(DR1)
	P39748(FEN1)					P10244(MYBL2)	P13682(ZNF35)		P27695(APEX1)	Q01081(U2AF1)	P13995(MTHFD2)	P15923(TCF3)	P11161(EGR2)														P09661(SNRPA1)					Q10472(GALNT1)			Q14694(USP10)			Q14694(USP10)						P09001(MRPL3)			Q02878(RPL6)
	P40937(RFC5)					P10253(GAA)	P13995(MTHFD2)		P31350(RRM2)	Q02880(TOP2B)	P14373(TRIM27)	P16104(H2AFX)	P11388(TOP2A)														P09874(PARP1)					Q13564(NAE1)			Q15029(EFTUD2)			Q15029(EFTUD2)						P09012(SNRPA)			Q03014(HHEX)
	P40938(RFC3)					P10515(DLAT)	P14373(TRIM27)		P32969(RPL9)	Q04837(SSBP1)	P15923(TCF3)	P16383(C2orf3)	P11474(ESRRA)														P10145(IL8)					Q13867(BLMH)			Q15056(EIF4H)			Q15056(EIF4H)						P09341(CXCL1)			Q03701(CEBPZ)
	P43268(ETV4)					P11161(EGR2)	P15923(TCF3)		P33981(TTK)	Q05048(CSTF1)	P15954(COX7C)	P16591(FER)	P11801(PSKH1)														P10244(MYBL2)					Q14694(USP10)			Q15370(TCEB2)			Q15370(TCEB2)						P09661(SNRPA1)			Q12857(NFIA)
	P49005(POLD2)					P11388(TOP2A)	P15954(COX7C)		P33993(MCM7)	Q05923(DUSP2)	P16104(H2AFX)	P17317(H2AFZ)	P11926(ODC1)														P10253(GAA)					Q15029(EFTUD2)			Q15375(EPHA7)			Q15375(EPHA7)						P09874(PARP1)			Q12905(ILF2)
	P49247(RPIA)					P11474(ESRRA)	P16104(H2AFX)		P35268(RPL22)	Q10472(GALNT1)	P16383(C2orf3)	P17812(CTPS)	P11940(PABPC1)														P10515(DLAT)					Q15056(EIF4H)			Q15393(SF3B3)			Q15393(SF3B3)						P10145(IL8)			Q12972(PPP1R8)
	P49321(NASP)					P11801(PSKH1)	P16383(C2orf3)		P36873(PPP1CC)	Q12857(NFIA)	P16591(FER)	P18077(RPL35A)	P12004(PCNA)														P11161(EGR2)					Q15370(TCEB2)			Q16667(CDKN3)			Q16667(CDKN3)						P10244(MYBL2)			Q13185(CBX3)
	P49450(CENPA)					P11926(ODC1)	P16591(FER)		P38398(BRCA1)	Q12934(BFSP1)	P17317(H2AFZ)	P18146(EGR1)	P12109(COL6A1)														P11388(TOP2A)					Q15375(EPHA7)			Q16695(HIST3H3)			Q16695(HIST3H3)						P10253(GAA)			Q13330(MTA1)
	P49642(PRIM1)					P11940(PABPC1)	P17317(H2AFZ)		P38646(HSPA9)	Q12972(PPP1R8)	P17812(CTPS)	P18754(RCC1)	P12931(SRC)														P11474(ESRRA)					Q15393(SF3B3)			Q86V81(THOC4)			Q86V81(THOC4)						P10515(DLAT)			Q13535(ATR)
	P49736(MCM2)					P12004(PCNA)	P17812(CTPS)		P38919(EIF4A3)	Q12996(CSTF3)	P18077(RPL35A)	P18847(ATF3)	P13010(XRCC5)														P11801(PSKH1)					Q16667(CDKN3)			Q8N4F7(RNF175)			Q8N4F7(RNF175)						P11161(EGR2)			Q14103(HNRNPD)
	P52434(POLR2H)					P12109(COL6A1)	P18077(RPL35A)		P39023(RPL3)	Q13185(CBX3)	P18146(EGR1)	P22087(FBL)	P13051(UNG)														P11926(ODC1)					Q16695(HIST3H3)			Q8NB16(MLKL)			Q8NB16(MLKL)						P11388(TOP2A)			Q14106(TOB2)
	P52597(HNRNPF)					P12644(BMP4)	P18146(EGR1)		P39748(FEN1)	Q13535(ATR)	P18754(RCC1)	P22090(RPS4Y1)	P13500(CCL2)														P11940(PABPC1)					Q86V81(THOC4)			Q8NI60(CABC1)			Q8NI60(CABC1)						P11474(ESRRA)			Q14186(TFDP1)
	P52701(MSH6)					P12931(SRC)	P18754(RCC1)		P40227(CCT6A)	Q13564(NAE1)	P18847(ATF3)	P22102(GART)	P13639(EEF2)														P12004(PCNA)					Q8N4F7(RNF175)			Q8TAA5(GRPEL2)			Q8TAA5(GRPEL2)						P11801(PSKH1)			Q14211(NFIL3)
	P53567(CEBPG)					P13010(XRCC5)	P18847(ATF3)		P40926(MDH2)	Q14103(HNRNPD)	P20674(COX5A)	P22234(PAICS)	P13682(ZNF35)														P12109(COL6A1)					Q8NB16(MLKL)			Q8TBR1(RPS2P32)			Q8TBR1(RPS2P32)						P11926(ODC1)			Q14469(HES1)
	P54132(BLM)					P13051(UNG)	P20674(COX5A)		P40937(RFC5)	Q14137(BOP1)	P22087(FBL)	P22303(ACHE)	P13995(MTHFD2)														P12644(BMP4)					Q8NI60(CABC1)			Q8TEQ6(GEMIN5)			Q8TEQ6(GEMIN5)						P11940(PABPC1)			Q14566(MCM6)
	P54198(HIRA)					P13500(CCL2)	P22087(FBL)		P40938(RFC3)	Q14566(MCM6)	P22090(RPS4Y1)	P22736(NR4A1)	P14373(TRIM27)														P12931(SRC)					Q8TAA5(GRPEL2)			Q92499(DDX1)			Q92499(DDX1)						P12004(PCNA)			Q15022(SUZ12)
	Q01081(U2AF1)					P13639(EEF2)	P22090(RPS4Y1)		P42766(RPL35)	Q14694(USP10)	P22102(GART)	P23246(SFPQ)	P14635(CCNB1)														P13010(XRCC5)					Q8TBR1(RPS2P32)			Q92598(HSPH1)			Q92598(HSPH1)						P12109(COL6A1)			Q15056(EIF4H)
	Q01658(DR1)					P13682(ZNF35)	P22102(GART)		P46777(RPL5)	Q14978(NOLC1)	P22234(PAICS)	P23396(RPS3)	P15923(TCF3)														P13051(UNG)					Q8TEQ6(GEMIN5)			Q92769(HDAC2)			Q92769(HDAC2)						P12644(BMP4)			Q15329(E2F5)
	Q02878(RPL6)					P13995(MTHFD2)	P22234(PAICS)		P46778(RPL21)	Q15022(SUZ12)	P22303(ACHE)	P23497(SP100)	P15954(COX7C)														P13500(CCL2)					Q92499(DDX1)			Q92830(KAT2A)			Q92830(KAT2A)						P12931(SRC)			Q15370(TCEB2)
	Q02880(TOP2B)					P14373(TRIM27)	P22303(ACHE)		P46782(RPS5)	Q15029(EFTUD2)	P22736(NR4A1)	P23919(DTYMK)	P16104(H2AFX)														P13639(EEF2)					Q92598(HSPH1)			Q92918(MAP4K1)			Q92918(MAP4K1)						P13010(XRCC5)			Q15906(VPS72)
	Q03014(HHEX)					P14635(CCNB1)	P22736(NR4A1)		P47914(RPL29)	Q15370(TCEB2)	P23246(SFPQ)	P24347(MMP11)	P16383(C2orf3)														P13682(ZNF35)					Q92769(HDAC2)			Q96DA6(DNAJC19)			Q96DA6(DNAJC19)						P13051(UNG)			Q15910(EZH2)
	Q03701(CEBPZ)					P15923(TCF3)	P23246(SFPQ)		P48147(PREP)	Q15375(EPHA7)	P23396(RPS3)	P24539(ATP5F1)	P16591(FER)														P13995(MTHFD2)					Q92830(KAT2A)			Q96E11(MRRF)			Q96E11(MRRF)						P13500(CCL2)			Q16667(CDKN3)
	Q04837(SSBP1)					P15954(COX7C)	P23396(RPS3)		P48643(CCT5)	Q15393(SF3B3)	P23497(SP100)	P25205(MCM3)	P17317(H2AFZ)														P14373(TRIM27)					Q92918(MAP4K1)			Q96EY1(DNAJA3)			Q96EY1(DNAJA3)						P13639(EEF2)			Q8WZ75(ROBO4)
	Q05048(CSTF1)					P16104(H2AFX)	P23497(SP100)		P49005(POLD2)	Q15717(ELAVL1)	P23526(AHCY)	P25789(PSMA4)	P17812(CTPS)														P14635(CCNB1)					Q96DA6(DNAJC19)			Q96GC5(MRPL48)			Q96GC5(MRPL48)						P13682(ZNF35)			Q92499(DDX1)
	Q06055(ATP5G2)					P16383(C2orf3)	P23526(AHCY)		P49207(RPL34)	Q15910(EZH2)	P23919(DTYMK)	P26358(DNMT1)	P18077(RPL35A)														P15923(TCF3)					Q96E11(MRRF)			Q96KB5(PBK)			Q96KB5(PBK)						P13995(MTHFD2)			Q92664(GTF3A)
	Q06203(PPAT)					P16591(FER)	P23919(DTYMK)		P49247(RPIA)	Q16629(SFRS7)	P24347(MMP11)	P26368(U2AF2)	P18146(EGR1)														P15954(COX7C)					Q96EY1(DNAJA3)			Q96S53(TOE1)			Q96S53(TOE1)						P14373(TRIM27)			Q92769(HDAC2)
	Q12857(NFIA)					P17317(H2AFZ)	P24347(MMP11)		P49321(NASP)	Q16667(CDKN3)	P24539(ATP5F1)	P26583(HMGB2)	P18754(RCC1)														P16104(H2AFX)					Q96GC5(MRPL48)			Q96SB4(SRPK1)			Q96SB4(SRPK1)						P14635(CCNB1)			Q92830(KAT2A)
	Q12905(ILF2)					P17812(CTPS)	P24539(ATP5F1)		P49368(CCT3)	Q16695(HIST3H3)	P25205(MCM3)	P26639(TARS)	P18847(ATF3)														P16383(C2orf3)					Q96KB5(PBK)			Q96T88(UHRF1)			Q96T88(UHRF1)						P15923(TCF3)			Q92918(MAP4K1)
	Q12934(BFSP1)					P18077(RPL35A)	P25205(MCM3)		P49406(MRPL19)	Q86V81(THOC4)	P25789(PSMA4)	P27144(AK3L1)	P20674(COX5A)														P16591(FER)					Q96S53(TOE1)			Q9BPZ3()			Q9BPZ3()						P15954(COX7C)			Q92922(SMARCC1)
	Q12972(PPP1R8)					P18146(EGR1)	P25789(PSMA4)		P49411(TUFM)	Q8N4F7(RNF175)	P26358(DNMT1)	P27695(APEX1)	P22087(FBL)														P16949(STMN1)					Q96SB4(SRPK1)			Q9BRJ2(MRPL45)			Q9BRJ2(MRPL45)						P16104(H2AFX)			Q96EY1(DNAJA3)
	Q12996(CSTF3)					P18754(RCC1)	P26358(DNMT1)		P49450(CENPA)	Q8NB16(MLKL)	P26368(U2AF2)	P27708(CAD)	P22090(RPS4Y1)														P17317(H2AFZ)					Q96T88(UHRF1)			Q9BYD1(MRPL13)			Q9BYD1(MRPL13)						P16383(C2orf3)			Q96LW7(C9orf89)
	Q13185(CBX3)					P18847(ATF3)	P26368(U2AF2)		P49642(PRIM1)	Q8TEQ6(GEMIN5)	P26583(HMGB2)	P28360(MSX1)	P22102(GART)														P17812(CTPS)					Q9BPZ3()			Q9H0Y0(RPS23)			Q9H0Y0(RPS23)						P16591(FER)			Q96Q89(KIF20B)
	Q13330(MTA1)					P20674(COX5A)	P26583(HMGB2)		P49736(MCM2)	Q92499(DDX1)	P26639(TARS)	P31249(HOXD3)	P22234(PAICS)														P18077(RPL35A)					Q9BRJ2(MRPL45)			Q9H0Y1(MRPL15)			Q9H0Y1(MRPL15)						P16949(STMN1)			Q96RK1(CITED4)
	Q13535(ATR)					P22087(FBL)	P26639(TARS)		P50897(PPT1)	Q92769(HDAC2)	P27144(AK3L1)	P31350(RRM2)	P22303(ACHE)														P18146(EGR1)					Q9BYD1(MRPL13)			Q9H1A4(ANAPC1)			Q9H1A4(ANAPC1)						P17317(H2AFZ)			Q96S55(WRNIP1)
	Q13951(CBFB)					P22090(RPS4Y1)	P27144(AK3L1)		P50914(RPL14)	Q92830(KAT2A)	P27695(APEX1)	P32969(RPL9)	P22736(NR4A1)														P18754(RCC1)					Q9H0Y0(RPS23)			Q9H5K3(SGK196)			Q9H5K3(SGK196)						P17812(CTPS)			Q96SB4(SRPK1)
	Q14103(HNRNPD)					P22102(GART)	P27695(APEX1)		P50990(CCT8)	Q92918(MAP4K1)	P27708(CAD)	P33981(TTK)	P23246(SFPQ)														P18847(ATF3)					Q9H0Y1(MRPL15)			Q9H9B1(EHMT1)			Q9H9B1(EHMT1)						P18077(RPL35A)			Q96SQ5(ZNF587)
	Q14137(BOP1)					P22234(PAICS)	P27708(CAD)		P50991(CCT4)	Q92922(SMARCC1)	P28360(MSX1)	P33993(MCM7)	P23396(RPS3)														P20674(COX5A)					Q9H1A4(ANAPC1)			Q9HD33(MRPL47)			Q9HD33(MRPL47)						P18146(EGR1)			Q96T88(UHRF1)
	Q14186(TFDP1)					P22303(ACHE)	P28360(MSX1)		P52597(HNRNPF)	Q969P6(TOP1MT)	P31249(HOXD3)	P35268(RPL22)	P23497(SP100)														P20936(CCNH)					Q9H5K3(SGK196)			Q9NPC3(CCNB1IP1)			Q9NPC3(CCNB1IP1)						P18754(RCC1)			Q99623(PHB2)
	Q14211(NFIL3)					P22466(GAL)	P31249(HOXD3)		P52701(MSH6)	Q96B26(EXOSC8)	P31350(RRM2)	P35520(CBS)	P23526(AHCY)														P22087(FBL)					Q9H9B1(EHMT1)			Q9NPD8(UBE2T)			Q9NPD8(UBE2T)						P18847(ATF3)			Q9BPZ3()
	Q14469(HES1)					P22736(NR4A1)	P31350(RRM2)		P52758(HRSP12)	Q96KB5(PBK)	P32969(RPL9)	P36873(PPP1CC)	P23919(DTYMK)														P22090(RPS4Y1)					Q9HD33(MRPL47)			Q9NQP4(PFDN4)			Q9NQP4(PFDN4)						P20674(COX5A)			Q9H1A4(ANAPC1)
	Q14566(MCM6)					P23246(SFPQ)	P32969(RPL9)		P52888(THOP1)	Q96PZ0(PUS7)	P33981(TTK)	P38398(BRCA1)	P24347(MMP11)														P22102(GART)					Q9NPC3(CCNB1IP1)			Q9NRL5(MRPL1)			Q9NRL5(MRPL1)						P20936(CCNH)			Q9NPJ4(PNRC2)
	Q14978(NOLC1)					P23396(RPS3)	P33981(TTK)		P54132(BLM)	Q96RR1(C10orf2)	P33993(MCM7)	P38646(HSPA9)	P24539(ATP5F1)														P22234(PAICS)					Q9NPD8(UBE2T)			Q9NSD9(FARSB)			Q9NSD9(FARSB)						P22087(FBL)			Q9NTW7(ZFP64)
	Q15022(SUZ12)					P23497(SP100)	P33993(MCM7)		P78371(CCT2)	Q96S53(TOE1)	P35268(RPL22)	P38919(EIF4A3)	P25205(MCM3)														P22303(ACHE)					Q9NQP4(PFDN4)			Q9NYY3(PLK2)			Q9NYY3(PLK2)						P22090(RPS4Y1)			Q9NVC6(MED17)
	Q15029(EFTUD2)					P23526(AHCY)	P35268(RPL22)		Q00796(SORD)	Q96S55(WRNIP1)	P35520(CBS)	P39023(RPL3)	P25789(PSMA4)														P22466(GAL)					Q9NRL5(MRPL1)			Q9NZE3(MEX3C)			Q9NZE3(MEX3C)						P22102(GART)			Q9NYY3(PLK2)
	Q15329(E2F5)					P23919(DTYMK)	P35520(CBS)		Q01081(U2AF1)	Q96SB4(SRPK1)	P36873(PPP1CC)	P39748(FEN1)	P26358(DNMT1)														P22736(NR4A1)					Q9NSD9(FARSB)			Q9NZJ4(SACS)			Q9NZJ4(SACS)						P22234(PAICS)			Q9P1U0(ZNRD1)
	Q15370(TCEB2)					P24347(MMP11)	P36873(PPP1CC)		Q02543(RPL18A)	Q96T60(PNKP)	P37288(AVPR1A)	P40227(CCT6A)	P26368(U2AF2)														P23246(SFPQ)					Q9NYY3(PLK2)			Q9NZW5(MPP6)			Q9NZW5(MPP6)						P22303(ACHE)			Q9P288(BCCIP)
	Q15393(SF3B3)					P24539(ATP5F1)	P37288(AVPR1A)		Q02790(FKBP4)	Q96T88(UHRF1)	P38398(BRCA1)	P40926(MDH2)	P26583(HMGB2)														P23396(RPS3)					Q9NZE3(MEX3C)			Q9P0X2(HSPA14)			Q9P0X2(HSPA14)						P22466(GAL)			Q9UFF9(CNOT8)
	Q15645(TRIP13)					P25205(MCM3)	P38398(BRCA1)		Q02878(RPL6)	Q99575(POP1)	P38646(HSPA9)	P40937(RFC5)	P26639(TARS)														P23497(SP100)					Q9NZJ4(SACS)			Q9P2J5(LARS)			Q9P2J5(LARS)						P22736(NR4A1)			Q9UGL1(KDM5B)
	Q15717(ELAVL1)					P25789(PSMA4)	P38646(HSPA9)		Q02880(TOP2B)	Q9H0Y0(RPS23)	P38919(EIF4A3)	P40938(RFC3)	P27144(AK3L1)														P23526(AHCY)					Q9NZW5(MPP6)			Q9UGN5(PARP2)			Q9UGN5(PARP2)						P23246(SFPQ)			Q9UJA5(TRMT6)
	Q15906(VPS72)					P26358(DNMT1)	P38919(EIF4A3)		Q04760(GLO1)	Q9H1A4(ANAPC1)	P39023(RPL3)	P42766(RPL35)	P27695(APEX1)														P23919(DTYMK)					Q9P0X2(HSPA14)			Q9UHV9(PFDN2)			Q9UHV9(PFDN2)						P23396(RPS3)			Q9UL69(C13orf15)
	Q15910(EZH2)					P26368(U2AF2)	P39023(RPL3)		Q04837(SSBP1)	Q9H361(PABPC3)	P39748(FEN1)	P43034(PAFAH1B1)	P27708(CAD)														P24347(MMP11)					Q9P2J5(LARS)			Q9UIV8(SERPINB13)			Q9UIV8(SERPINB13)						P23497(SP100)			Q9ULD5(ZNF777)
	Q16629(SFRS7)					P26583(HMGB2)	P39748(FEN1)		Q05048(CSTF1)	Q9H5K3(SGK196)	P40227(CCT6A)	P43268(ETV4)	P28360(MSX1)														P24539(ATP5F1)					Q9UGN5(PARP2)			Q9UJA5(TRMT6)			Q9UJA5(TRMT6)						P23526(AHCY)			Q9UQ80(PA2G4)
	Q16695(HIST3H3)					P26639(TARS)	P40227(CCT6A)		Q05923(DUSP2)	Q9H9B1(EHMT1)	P40926(MDH2)	P46777(RPL5)	P31249(HOXD3)														P25205(MCM3)					Q9UHV9(PFDN2)			Q9UKB3(DNAJC12)			Q9UKB3(DNAJC12)						P23919(DTYMK)			Q9Y265(RUVBL1)
	Q86V81(THOC4)					P27144(AK3L1)	P40926(MDH2)		Q07020(RPL18)	Q9NPC3(CCNB1IP1)	P40937(RFC5)	P46778(RPL21)	P31350(RRM2)														P25789(PSMA4)					Q9UIV8(SERPINB13)			Q9UKT4(FBXO5)			Q9UKT4(FBXO5)						P24347(MMP11)			Q9Y3A2(UTP11L)
	Q8IVG1(SMEK1)					P27695(APEX1)	P40937(RFC5)		Q10472(GALNT1)	Q9NPD8(UBE2T)	P40938(RFC3)	P46782(RPS5)	P32969(RPL9)														P26358(DNMT1)					Q9UJA5(TRMT6)			Q9UNX3(RPL26L1)			Q9UNX3(RPL26L1)						P24539(ATP5F1)
	Q8TEQ6(GEMIN5)					P27708(CAD)	P40938(RFC3)		Q12857(NFIA)	Q9NPI6(DCP1A)	P42766(RPL35)	P47914(RPL29)	P33552(CKS2)														P26368(U2AF2)					Q9UKB3(DNAJC12)			Q9UQ80(PA2G4)			Q9UQ80(PA2G4)						P25205(MCM3)
	Q8WUA4(GTF3C2)					P28360(MSX1)	P42766(RPL35)		Q12934(BFSP1)	Q9NRF9(POLE3)	P43268(ETV4)	P48147(PREP)	P33981(TTK)														P26583(HMGB2)					Q9UKT4(FBXO5)			Q9Y237(RPS4X)			Q9Y237(RPS4X)						P25789(PSMA4)
	Q92499(DDX1)					P29275(ADORA2B)	P43034(PAFAH1B1)		Q12972(PPP1R8)	Q9NSD9(FARSB)	P46777(RPL5)	P48643(CCT5)	P33993(MCM7)														P26639(TARS)					Q9UNX3(RPL26L1)			Q9Y399(MRPS2)			Q9Y399(MRPS2)						P26358(DNMT1)
	Q92664(GTF3A)					P29459(IL12A)	P43268(ETV4)		Q12996(CSTF3)	Q9NX24(NHP2)	P46778(RPL21)	P49005(POLD2)	P35268(RPL22)														P27144(AK3L1)					Q9UQ80(PA2G4)			Q9Y3U8(RPL36)			Q9Y3U8(RPL36)						P26368(U2AF2)
	Q92769(HDAC2)					P31249(HOXD3)	P46777(RPL5)		Q13185(CBX3)	Q9NY12(GAR1)	P46782(RPS5)	P49207(RPL34)	P35520(CBS)														P27695(APEX1)					Q9Y237(RPS4X)			Q9Y6G3(MRPL42)			Q9Y6G3(MRPL42)						P26583(HMGB2)
	Q92830(KAT2A)					P31350(RRM2)	P46778(RPL21)		Q13535(ATR)	Q9NYY3(PLK2)	P47914(RPL29)	P49247(RPIA)	P36873(PPP1CC)														P27708(CAD)					Q9Y399(MRPS2)			Q9Y6I4(USP3)			Q9Y6I4(USP3)						P26639(TARS)
	Q92922(SMARCC1)					P32969(RPL9)	P46782(RPS5)		Q13564(NAE1)	Q9NZE3(MEX3C)	P48147(PREP)	P49321(NASP)	P37288(AVPR1A)														P28360(MSX1)					Q9Y3U8(RPL36)			Q9Y6J8(STYXL1)			Q9Y6J8(STYXL1)						P27144(AK3L1)
	Q969P6(TOP1MT)					P33552(CKS2)	P47914(RPL29)		Q13867(BLMH)	Q9P2J5(LARS)	P48643(CCT5)	P49368(CCT3)	P38398(BRCA1)														P29275(ADORA2B)					Q9Y6G3(MRPL42)												P27695(APEX1)
	Q96B26(EXOSC8)					P33981(TTK)	P48147(PREP)		Q14103(HNRNPD)	Q9UBP6(METTL1)	P49005(POLD2)	P49406(MRPL19)	P38646(HSPA9)														P31249(HOXD3)					Q9Y6I4(USP3)												P27708(CAD)
	Q96PZ0(PUS7)					P33993(MCM7)	P48643(CCT5)		Q14137(BOP1)	Q9UGN5(PARP2)	P49207(RPL34)	P49411(TUFM)	P38919(EIF4A3)														P31350(RRM2)					Q9Y6J8(STYXL1)												P28360(MSX1)
	Q96RK1(CITED4)					P35268(RPL22)	P49005(POLD2)		Q14566(MCM6)	Q9UK45(LSM7)	P49247(RPIA)	P49450(CENPA)	P39023(RPL3)														P32969(RPL9)																	P29275(ADORA2B)
	Q96RR1(C10orf2)					P35520(CBS)	P49207(RPL34)		Q14694(USP10)	Q9UKT4(FBXO5)	P49321(NASP)	P49642(PRIM1)	P39687(ANP32A)														P33552(CKS2)																	P29459(IL12A)
	Q96S55(WRNIP1)					P36873(PPP1CC)	P49247(RPIA)		Q14978(NOLC1)	Q9Y265(RUVBL1)	P49368(CCT3)	P49736(MCM2)	P39748(FEN1)														P33981(TTK)																	P31249(HOXD3)
	Q96SB4(SRPK1)					P37288(AVPR1A)	P49321(NASP)		Q15022(SUZ12)	Q9Y2X3(NOP58)	P49406(MRPL19)	P50897(PPT1)	P40227(CCT6A)														P33993(MCM7)																	P31350(RRM2)
	Q96SQ5(ZNF587)					P38398(BRCA1)	P49368(CCT3)		Q15029(EFTUD2)	Q9Y333(LSM2)	P49411(TUFM)	P50914(RPL14)	P40926(MDH2)														P35268(RPL22)																	P31948(STIP1)
	Q96T60(PNKP)					P38646(HSPA9)	P49406(MRPL19)		Q15056(EIF4H)	Q9Y3A2(UTP11L)	P49450(CENPA)	P50990(CCT8)	P40937(RFC5)														P35520(CBS)																	P32969(RPL9)
	Q96T88(UHRF1)					P38919(EIF4A3)	P49411(TUFM)		Q15370(TCEB2)	Q9Y3B4(SF3B14)	P49642(PRIM1)	P50991(CCT4)	P40938(RFC3)														P36873(PPP1CC)																	P33552(CKS2)
	Q99575(POP1)					P39023(RPL3)	P49450(CENPA)		Q15375(EPHA7)	Q9Y4Y9(LSM5)	P49736(MCM2)	P52434(POLR2H)	P41220(RGS2)														P37288(AVPR1A)																	P33981(TTK)
	Q99623(PHB2)					P39687(ANP32A)	P49642(PRIM1)		Q15393(SF3B3)	Q9Y6I4(USP3)	P50897(PPT1)	P52597(HNRNPF)	P42766(RPL35)														P38398(BRCA1)																	P33993(MCM7)
	Q99808(SLC29A1)					P39748(FEN1)	P49736(MCM2)		Q15717(ELAVL1)	Q9Y6J8(STYXL1)	P50914(RPL14)	P52701(MSH6)	P42771(CDKN2A)														P38646(HSPA9)																	P35268(RPL22)
	Q9H361(PABPC3)					P40227(CCT6A)	P50897(PPT1)		Q15910(EZH2)		P50990(CCT8)	P52758(HRSP12)	P43034(PAFAH1B1)														P38919(EIF4A3)																	P35520(CBS)
	Q9H9B1(EHMT1)					P40926(MDH2)	P50914(RPL14)		Q16629(SFRS7)		P50991(CCT4)	P52888(THOP1)	P43268(ETV4)														P39023(RPL3)																	P36873(PPP1CC)
	Q9NPI6(DCP1A)					P40937(RFC5)	P50990(CCT8)		Q16667(CDKN3)		P52434(POLR2H)	P53567(CEBPG)	P46087(NOP2)														P39687(ANP32A)																	P37288(AVPR1A)
	Q9NPJ4(PNRC2)					P40938(RFC3)	P50991(CCT4)		Q16695(HIST3H3)		P52597(HNRNPF)	P54132(BLM)	P46777(RPL5)														P39748(FEN1)																	P38159(RBMX)
	Q9NRF9(POLE3)					P41220(RGS2)	P52434(POLR2H)		Q86V81(THOC4)		P52701(MSH6)	P54198(HIRA)	P46778(RPL21)														P40227(CCT6A)																	P38398(BRCA1)
	Q9NSD9(FARSB)					P42766(RPL35)	P52597(HNRNPF)		Q8N4F7(RNF175)		P52758(HRSP12)	P54886(ALDH18A1)	P46782(RPS5)														P40926(MDH2)																	P38646(HSPA9)
	Q9NTW7(ZFP64)					P42771(CDKN2A)	P52701(MSH6)		Q8NB16(MLKL)		P52888(THOP1)	P78371(CCT2)	P47914(RPL29)														P40937(RFC5)																	P38919(EIF4A3)
	Q9NVC6(MED17)					P43034(PAFAH1B1)	P52758(HRSP12)		Q8NI60(CABC1)		P53567(CEBPG)	Q00796(SORD)	P48147(PREP)														P40938(RFC3)																	P39023(RPL3)
	Q9NVU0(POLR3E)					P43268(ETV4)	P52888(THOP1)		Q8TAA5(GRPEL2)		P54132(BLM)	Q01081(U2AF1)	P48643(CCT5)														P41220(RGS2)																	P39687(ANP32A)
	Q9NX24(NHP2)					P46087(NOP2)	P53567(CEBPG)		Q8TBR1(RPS2P32)		P54198(HIRA)	Q01469(FABP5)	P49005(POLD2)														P42766(RPL35)																	P39748(FEN1)
	Q9NY12(GAR1)					P46777(RPL5)	P54132(BLM)		Q8TEQ6(GEMIN5)		P54886(ALDH18A1)	Q01658(DR1)	P49207(RPL34)														P42771(CDKN2A)																	P40227(CCT6A)
	Q9P1U0(ZNRD1)					P46778(RPL21)	P54198(HIRA)		Q92499(DDX1)		P78371(CCT2)	Q02543(RPL18A)	P49247(RPIA)														P43034(PAFAH1B1)																	P40926(MDH2)
	Q9P2J5(LARS)					P46782(RPS5)	P54886(ALDH18A1)		Q92598(HSPH1)		Q00796(SORD)	Q02790(FKBP4)	P49321(NASP)														P43268(ETV4)																	P40937(RFC5)
	Q9UBP6(METTL1)					P47914(RPL29)	P78371(CCT2)		Q92769(HDAC2)		Q01081(U2AF1)	Q02878(RPL6)	P49368(CCT3)														P46087(NOP2)																	P40938(RFC3)
	Q9UFF9(CNOT8)					P48147(PREP)	Q00796(SORD)		Q92830(KAT2A)		Q01658(DR1)	Q02880(TOP2B)	P49406(MRPL19)														P46777(RPL5)																	P41220(RGS2)
	Q9UGL1(KDM5B)					P48643(CCT5)	Q01081(U2AF1)		Q92918(MAP4K1)		Q02543(RPL18A)	Q03014(HHEX)	P49411(TUFM)														P46778(RPL21)																	P42704(LRPPRC)
	Q9UGN5(PARP2)					P49005(POLD2)	Q01469(FABP5)		Q92922(SMARCC1)		Q02790(FKBP4)	Q03701(CEBPZ)	P49450(CENPA)														P46782(RPS5)																	P42766(RPL35)
	Q9UK45(LSM7)					P49207(RPL34)	Q01658(DR1)		Q969P6(TOP1MT)		Q02878(RPL6)	Q04760(GLO1)	P49454(CENPF)														P47736(RAP1GAP)																	P42771(CDKN2A)
	Q9ULD5(ZNF777)					P49247(RPIA)	Q02543(RPL18A)		Q96B26(EXOSC8)		Q02880(TOP2B)	Q04837(SSBP1)	P49642(PRIM1)														P47914(RPL29)																	P43034(PAFAH1B1)
	Q9Y265(RUVBL1)					P49321(NASP)	Q02790(FKBP4)		Q96DA6(DNAJC19)		Q03014(HHEX)	Q05048(CSTF1)	P49682(CXCR3)														P48147(PREP)																	P43268(ETV4)
	Q9Y2S0(POLR1D)					P49368(CCT3)	Q02878(RPL6)		Q96E11(MRRF)		Q03701(CEBPZ)	Q05923(DUSP2)	P49736(MCM2)														P48643(CCT5)																	P46087(NOP2)
	Q9Y2X3(NOP58)					P49406(MRPL19)	Q02880(TOP2B)		Q96EY1(DNAJA3)		Q04837(SSBP1)	Q06055(ATP5G2)	P50552(VASP)														P49005(POLD2)																	P46777(RPL5)
	Q9Y333(LSM2)					P49411(TUFM)	Q03014(HHEX)		Q96GC5(MRPL48)		Q05048(CSTF1)	Q06203(PPAT)	P50897(PPT1)														P49207(RPL34)																	P46778(RPL21)
	Q9Y3A2(UTP11L)					P49450(CENPA)	Q03701(CEBPZ)		Q96KB5(PBK)		Q05923(DUSP2)	Q07020(RPL18)	P50914(RPL14)														P49247(RPIA)																	P46782(RPS5)
	Q9Y3B4(SF3B14)					P49454(CENPF)	Q04760(GLO1)		Q96PZ0(PUS7)		Q06055(ATP5G2)	Q10472(GALNT1)	P50990(CCT8)														P49321(NASP)																	P47736(RAP1GAP)
	Q9Y4Y9(LSM5)					P49642(PRIM1)	Q04837(SSBP1)		Q96RR1(C10orf2)		Q06203(PPAT)	Q12857(NFIA)	P50991(CCT4)														P49368(CCT3)																	P47914(RPL29)
						P49682(CXCR3)	Q05048(CSTF1)		Q96S53(TOE1)		Q07020(RPL18)	Q12905(ILF2)	P51858(HDGF)														P49406(MRPL19)																	P48147(PREP)
						P49736(MCM2)	Q05923(DUSP2)		Q96S55(WRNIP1)		Q10472(GALNT1)	Q12934(BFSP1)	P51959(CCNG1)														P49411(TUFM)																	P48643(CCT5)
						P50552(VASP)	Q06055(ATP5G2)		Q96SB4(SRPK1)		Q12857(NFIA)	Q12972(PPP1R8)	P52434(POLR2H)														P49450(CENPA)																	P49005(POLD2)
						P50897(PPT1)	Q06203(PPAT)		Q96T60(PNKP)		Q12905(ILF2)	Q12996(CSTF3)	P52597(HNRNPF)														P49454(CENPF)																	P49207(RPL34)
						P50914(RPL14)	Q07020(RPL18)		Q96T88(UHRF1)		Q12934(BFSP1)	Q13185(CBX3)	P52701(MSH6)														P49642(PRIM1)																	P49247(RPIA)
						P50990(CCT8)	Q10472(GALNT1)		Q99575(POP1)		Q12972(PPP1R8)	Q13330(MTA1)	P52758(HRSP12)														P49682(CXCR3)																	P49321(NASP)
						P50991(CCT4)	Q12857(NFIA)		Q9BPZ3()		Q12996(CSTF3)	Q13535(ATR)	P52888(THOP1)														P49736(MCM2)																	P49368(CCT3)
						P51858(HDGF)	Q12905(ILF2)		Q9BRJ2(MRPL45)		Q13185(CBX3)	Q13564(NAE1)	P53567(CEBPG)														P50552(VASP)																	P49406(MRPL19)
						P51959(CCNG1)	Q12934(BFSP1)		Q9BYD1(MRPL13)		Q13330(MTA1)	Q13867(BLMH)	P53985(SLC16A1)														P50897(PPT1)																	P49411(TUFM)
						P52434(POLR2H)	Q12972(PPP1R8)		Q9H0Y0(RPS23)		Q13535(ATR)	Q13951(CBFB)	P54105(CLNS1A)														P50914(RPL14)																	P49450(CENPA)
						P52597(HNRNPF)	Q12996(CSTF3)		Q9H0Y1(MRPL15)		Q13564(NAE1)	Q14103(HNRNPD)	P54132(BLM)														P50990(CCT8)																	P49454(CENPF)
						P52701(MSH6)	Q13185(CBX3)		Q9H1A4(ANAPC1)		Q13867(BLMH)	Q14137(BOP1)	P54198(HIRA)														P50991(CCT4)																	P49642(PRIM1)
						P52758(HRSP12)	Q13330(MTA1)		Q9H361(PABPC3)		Q13951(CBFB)	Q14186(TFDP1)	P54886(ALDH18A1)														P51858(HDGF)																	P49682(CXCR3)
						P52888(THOP1)	Q13535(ATR)		Q9H5K3(SGK196)		Q14103(HNRNPD)	Q14211(NFIL3)	P55042(RRAD)														P51959(CCNG1)																	P49736(MCM2)
						P53567(CEBPG)	Q13564(NAE1)		Q9H9B1(EHMT1)		Q14137(BOP1)	Q14469(HES1)	P55060(CSE1L)														P52434(POLR2H)																	P50552(VASP)
						P53985(SLC16A1)	Q13867(BLMH)		Q9HD33(MRPL47)		Q14186(TFDP1)	Q14566(MCM6)	P57740(NUP107)														P52597(HNRNPF)																	P50897(PPT1)
						P54105(CLNS1A)	Q13951(CBFB)		Q9NPC3(CCNB1IP1)		Q14211(NFIL3)	Q14694(USP10)	P58549(FXYD7)														P52701(MSH6)																	P50914(RPL14)
						P54132(BLM)	Q14103(HNRNPD)		Q9NPD8(UBE2T)		Q14469(HES1)	Q14978(NOLC1)	P78371(CCT2)														P52758(HRSP12)																	P50990(CCT8)
						P54198(HIRA)	Q14137(BOP1)		Q9NPI6(DCP1A)		Q14566(MCM6)	Q15022(SUZ12)	Q00796(SORD)														P52888(THOP1)																	P50991(CCT4)
						P54886(ALDH18A1)	Q14186(TFDP1)		Q9NQP4(PFDN4)		Q14694(USP10)	Q15029(EFTUD2)	Q01081(U2AF1)														P53567(CEBPG)																	P51858(HDGF)
						P55042(RRAD)	Q14211(NFIL3)		Q9NRF9(POLE3)		Q14978(NOLC1)	Q15056(EIF4H)	Q01469(FABP5)														P53985(SLC16A1)																	P51959(CCNG1)
						P55060(CSE1L)	Q14469(HES1)		Q9NRL5(MRPL1)		Q15022(SUZ12)	Q15329(E2F5)	Q01658(DR1)														P54105(CLNS1A)																	P52434(POLR2H)
						P57740(NUP107)	Q14566(MCM6)		Q9NSD9(FARSB)		Q15029(EFTUD2)	Q15370(TCEB2)	Q02543(RPL18A)														P54132(BLM)																	P52597(HNRNPF)
						P58549(FXYD7)	Q14694(USP10)		Q9NX24(NHP2)		Q15056(EIF4H)	Q15375(EPHA7)	Q02790(FKBP4)														P54198(HIRA)																	P52701(MSH6)
						P78371(CCT2)	Q14978(NOLC1)		Q9NY12(GAR1)		Q15181(PPA1)	Q15393(SF3B3)	Q02878(RPL6)														P54886(ALDH18A1)																	P52758(HRSP12)
						Q00796(SORD)	Q15022(SUZ12)		Q9NYY3(PLK2)		Q15329(E2F5)	Q15645(TRIP13)	Q02880(TOP2B)														P55042(RRAD)																	P52888(THOP1)
						Q01081(U2AF1)	Q15029(EFTUD2)		Q9NZE3(MEX3C)		Q15370(TCEB2)	Q15717(ELAVL1)	Q03014(HHEX)														P55060(CSE1L)																	P53567(CEBPG)
						Q01469(FABP5)	Q15056(EIF4H)		Q9NZJ4(SACS)		Q15375(EPHA7)	Q15906(VPS72)	Q03701(CEBPZ)														P57740(NUP107)																	P53985(SLC16A1)
						Q01658(DR1)	Q15181(PPA1)		Q9NZW5(MPP6)		Q15393(SF3B3)	Q15910(EZH2)	Q04837(SSBP1)														P58549(FXYD7)																	P54105(CLNS1A)
						Q02543(RPL18A)	Q15329(E2F5)		Q9P0X2(HSPA14)		Q15645(TRIP13)	Q16629(SFRS7)	Q05048(CSTF1)														P78371(CCT2)																	P54132(BLM)
						Q02790(FKBP4)	Q15370(TCEB2)		Q9P2J5(LARS)		Q15717(ELAVL1)	Q16667(CDKN3)	Q05193(DNM1)														Q00796(SORD)																	P54198(HIRA)
						Q02878(RPL6)	Q15375(EPHA7)		Q9UBP6(METTL1)		Q15906(VPS72)	Q16695(HIST3H3)	Q05923(DUSP2)														Q01081(U2AF1)																	P54886(ALDH18A1)
						Q02880(TOP2B)	Q15393(SF3B3)		Q9UGN5(PARP2)		Q15910(EZH2)	Q86V81(THOC4)	Q06055(ATP5G2)														Q01469(FABP5)																	P55042(RRAD)
						Q03014(HHEX)	Q15645(TRIP13)		Q9UHV9(PFDN2)		Q16629(SFRS7)	Q8IVG1(SMEK1)	Q06203(PPAT)														Q01658(DR1)																	P55060(CSE1L)
						Q03701(CEBPZ)	Q15717(ELAVL1)		Q9UIV8(SERPINB13)		Q16667(CDKN3)	Q8N4F7(RNF175)	Q07020(RPL18)														Q02543(RPL18A)																	P55327(TPD52)
						Q04760(GLO1)	Q15906(VPS72)		Q9UJA5(TRMT6)		Q16678(CYP1B1)	Q8NB16(MLKL)	Q10472(GALNT1)														Q02790(FKBP4)																	P57740(NUP107)
						Q04837(SSBP1)	Q15910(EZH2)		Q9UK45(LSM7)		Q16695(HIST3H3)	Q8NI60(CABC1)	Q12857(NFIA)														Q02878(RPL6)																	P58549(FXYD7)
						Q05048(CSTF1)	Q16629(SFRS7)		Q9UKB3(DNAJC12)		Q86V81(THOC4)	Q8TAA5(GRPEL2)	Q12894(IFRD2)														Q02880(TOP2B)																	P78371(CCT2)
						Q05193(DNM1)	Q16667(CDKN3)		Q9UKT4(FBXO5)		Q8IVG1(SMEK1)	Q8TBR1(RPS2P32)	Q12905(ILF2)														Q03014(HHEX)																	Q00796(SORD)
						Q05923(DUSP2)	Q16678(CYP1B1)		Q9UNX3(RPL26L1)		Q8N4F7(RNF175)	Q8TEQ6(GEMIN5)	Q12934(BFSP1)														Q03701(CEBPZ)																	Q01081(U2AF1)
						Q06055(ATP5G2)	Q16695(HIST3H3)		Q9UQ80(PA2G4)		Q8NB16(MLKL)	Q8WUA4(GTF3C2)	Q12972(PPP1R8)														Q04837(SSBP1)																	Q01469(FABP5)
						Q06203(PPAT)	Q86V81(THOC4)		Q9Y237(RPS4X)		Q8NI60(CABC1)	Q92499(DDX1)	Q12996(CSTF3)														Q05048(CSTF1)																	Q01658(DR1)
						Q07020(RPL18)	Q8IVG1(SMEK1)		Q9Y265(RUVBL1)		Q8TAA5(GRPEL2)	Q92598(HSPH1)	Q13185(CBX3)														Q05193(DNM1)																	Q02543(RPL18A)
						Q10472(GALNT1)	Q8N4F7(RNF175)		Q9Y2X3(NOP58)		Q8TAV3(CYP2W1)	Q92664(GTF3A)	Q13330(MTA1)														Q05923(DUSP2)																	Q02790(FKBP4)
						Q12857(NFIA)	Q8NB16(MLKL)		Q9Y333(LSM2)		Q8TBR1(RPS2P32)	Q92769(HDAC2)	Q13428(TCOF1)														Q06055(ATP5G2)																	Q02878(RPL6)
						Q12894(IFRD2)	Q8NI60(CABC1)		Q9Y399(MRPS2)		Q8TEQ6(GEMIN5)	Q92830(KAT2A)	Q13535(ATR)														Q06203(PPAT)																	Q02880(TOP2B)
						Q12905(ILF2)	Q8TAA5(GRPEL2)		Q9Y3A2(UTP11L)		Q8WUA4(GTF3C2)	Q92918(MAP4K1)	Q13564(NAE1)														Q07020(RPL18)																	Q03014(HHEX)
						Q12934(BFSP1)	Q8TAV3(CYP2W1)		Q9Y3B4(SF3B14)		Q92499(DDX1)	Q92922(SMARCC1)	Q13867(BLMH)														Q07507(DPT)																	Q03701(CEBPZ)
						Q12972(PPP1R8)	Q8TBR1(RPS2P32)		Q9Y3U8(RPL36)		Q92598(HSPH1)	Q969P6(TOP1MT)	Q13951(CBFB)														Q10472(GALNT1)																	Q04760(GLO1)
						Q12996(CSTF3)	Q8TEQ6(GEMIN5)		Q9Y4Y9(LSM5)		Q92664(GTF3A)	Q96B26(EXOSC8)	Q14103(HNRNPD)														Q12857(NFIA)																	Q04837(SSBP1)
						Q13185(CBX3)	Q8WUA4(GTF3C2)		Q9Y6G3(MRPL42)		Q92769(HDAC2)	Q96DA6(DNAJC19)	Q14106(TOB2)														Q12894(IFRD2)																	Q05048(CSTF1)
						Q13330(MTA1)	Q92499(DDX1)		Q9Y6I4(USP3)		Q92830(KAT2A)	Q96E11(MRRF)	Q14137(BOP1)														Q12905(ILF2)																	Q05193(DNM1)
						Q13428(TCOF1)	Q92598(HSPH1)		Q9Y6J8(STYXL1)		Q92918(MAP4K1)	Q96EY1(DNAJA3)	Q14186(TFDP1)														Q12934(BFSP1)																	Q05923(DUSP2)
						Q13535(ATR)	Q92664(GTF3A)				Q92922(SMARCC1)	Q96GC5(MRPL48)	Q14211(NFIL3)														Q12972(PPP1R8)																	Q06055(ATP5G2)
						Q13564(NAE1)	Q92769(HDAC2)				Q969P6(TOP1MT)	Q96KB5(PBK)	Q14469(HES1)														Q12996(CSTF3)																	Q06203(PPAT)
						Q13867(BLMH)	Q92830(KAT2A)				Q96B26(EXOSC8)	Q96PZ0(PUS7)	Q14566(MCM6)														Q13185(CBX3)																	Q07020(RPL18)
						Q13951(CBFB)	Q92918(MAP4K1)				Q96DA6(DNAJC19)	Q96RK1(CITED4)	Q14694(USP10)														Q13330(MTA1)																	Q07507(DPT)
						Q14103(HNRNPD)	Q92922(SMARCC1)				Q96E11(MRRF)	Q96RR1(C10orf2)	Q14978(NOLC1)														Q13428(TCOF1)																	Q10472(GALNT1)
						Q14106(TOB2)	Q969P6(TOP1MT)				Q96EY1(DNAJA3)	Q96S53(TOE1)	Q15021(NCAPD2)														Q13535(ATR)																	Q12857(NFIA)
						Q14137(BOP1)	Q96B26(EXOSC8)				Q96GC5(MRPL48)	Q96S55(WRNIP1)	Q15022(SUZ12)														Q13564(NAE1)																	Q12894(IFRD2)
						Q14186(TFDP1)	Q96DA6(DNAJC19)				Q96KB5(PBK)	Q96SB4(SRPK1)	Q15029(EFTUD2)														Q13867(BLMH)																	Q12905(ILF2)
						Q14211(NFIL3)	Q96E11(MRRF)				Q96PZ0(PUS7)	Q96SQ5(ZNF587)	Q15043(SLC39A14)														Q13951(CBFB)																	Q12934(BFSP1)
						Q14469(HES1)	Q96EY1(DNAJA3)				Q96RK1(CITED4)	Q96T60(PNKP)	Q15050(RRS1)														Q14103(HNRNPD)																	Q12972(PPP1R8)
						Q14566(MCM6)	Q96GC5(MRPL48)				Q96RR1(C10orf2)	Q96T88(UHRF1)	Q15056(EIF4H)														Q14106(TOB2)																	Q12996(CSTF3)
						Q14694(USP10)	Q96KB5(PBK)				Q96S53(TOE1)	Q99575(POP1)	Q15181(PPA1)														Q14137(BOP1)																	Q13185(CBX3)
						Q14978(NOLC1)	Q96PZ0(PUS7)				Q96S55(WRNIP1)	Q99623(PHB2)	Q15329(E2F5)														Q14186(TFDP1)																	Q13330(MTA1)
						Q15021(NCAPD2)	Q96RK1(CITED4)				Q96SB4(SRPK1)	Q99808(SLC29A1)	Q15370(TCEB2)														Q14211(NFIL3)																	Q13428(TCOF1)
						Q15022(SUZ12)	Q96RR1(C10orf2)				Q96SQ5(ZNF587)	Q99829(RBM12)	Q15375(EPHA7)														Q14469(HES1)																	Q13535(ATR)
						Q15029(EFTUD2)	Q96S53(TOE1)				Q96T60(PNKP)	Q9BPZ3()	Q15393(SF3B3)														Q14566(MCM6)																	Q13564(NAE1)
						Q15043(SLC39A14)	Q96S55(WRNIP1)				Q96T88(UHRF1)	Q9BRJ2(MRPL45)	Q15398(DLGAP5)														Q14694(USP10)																	Q13867(BLMH)
						Q15050(RRS1)	Q96SB4(SRPK1)				Q99575(POP1)	Q9BY08(EBPL)	Q15546(MMD)														Q14978(NOLC1)																	Q13951(CBFB)
						Q15056(EIF4H)	Q96SQ5(ZNF587)				Q99623(PHB2)	Q9BYD1(MRPL13)	Q15645(TRIP13)														Q15021(NCAPD2)																	Q14103(HNRNPD)
						Q15181(PPA1)	Q96T60(PNKP)				Q99808(SLC29A1)	Q9H0Y0(RPS23)	Q15717(ELAVL1)														Q15022(SUZ12)																	Q14106(TOB2)
						Q15329(E2F5)	Q96T88(UHRF1)				Q9BPZ3()	Q9H0Y1(MRPL15)	Q15906(VPS72)														Q15029(EFTUD2)																	Q14137(BOP1)
						Q15370(TCEB2)	Q99575(POP1)				Q9BRJ2(MRPL45)	Q9H1A4(ANAPC1)	Q15910(EZH2)														Q15043(SLC39A14)																	Q14186(TFDP1)
						Q15375(EPHA7)	Q99623(PHB2)				Q9BY08(EBPL)	Q9H361(PABPC3)	Q16342(PDCD2)														Q15050(RRS1)																	Q14211(NFIL3)
						Q15393(SF3B3)	Q99808(SLC29A1)				Q9BYD1(MRPL13)	Q9H5K3(SGK196)	Q16629(SFRS7)														Q15056(EIF4H)																	Q14469(HES1)
						Q15398(DLGAP5)	Q99829(RBM12)				Q9H0H5(RACGAP1)	Q9H9B1(EHMT1)	Q16667(CDKN3)														Q15181(PPA1)																	Q14566(MCM6)
						Q15546(MMD)	Q9BPZ3()				Q9H0Y0(RPS23)	Q9HD33(MRPL47)	Q16678(CYP1B1)														Q15329(E2F5)																	Q14694(USP10)
						Q15645(TRIP13)	Q9BRJ2(MRPL45)				Q9H0Y1(MRPL15)	Q9NPC3(CCNB1IP1)	Q16695(HIST3H3)														Q15370(TCEB2)																	Q14978(NOLC1)
						Q15717(ELAVL1)	Q9BY08(EBPL)				Q9H1A4(ANAPC1)	Q9NPD8(UBE2T)	Q86V81(THOC4)														Q15375(EPHA7)																	Q15021(NCAPD2)
						Q15906(VPS72)	Q9BYD1(MRPL13)				Q9H361(PABPC3)	Q9NPI6(DCP1A)	Q8IVG1(SMEK1)														Q15393(SF3B3)																	Q15022(SUZ12)
						Q15910(EZH2)	Q9BZX2(UCK2)				Q9H5K3(SGK196)	Q9NPJ4(PNRC2)	Q8IZT6(ASPM)														Q15398(DLGAP5)																	Q15029(EFTUD2)
						Q16342(PDCD2)	Q9H0H5(RACGAP1)				Q9H9B1(EHMT1)	Q9NQP4(PFDN4)	Q8N4F7(RNF175)														Q15546(MMD)																	Q15043(SLC39A14)
						Q16629(SFRS7)	Q9H0Y0(RPS23)				Q9HD33(MRPL47)	Q9NRF9(POLE3)	Q8NB16(MLKL)														Q15645(TRIP13)																	Q15050(RRS1)
						Q16667(CDKN3)	Q9H0Y1(MRPL15)				Q9NPC3(CCNB1IP1)	Q9NRL5(MRPL1)	Q8NBN2(C8orf55)														Q15717(ELAVL1)																	Q15056(EIF4H)
						Q16678(CYP1B1)	Q9H1A4(ANAPC1)				Q9NPD8(UBE2T)	Q9NSD9(FARSB)	Q8NDM4(TBRG4)														Q15906(VPS72)																	Q15113(PCOLCE)
						Q16695(HIST3H3)	Q9H361(PABPC3)				Q9NPI6(DCP1A)	Q9NTW7(ZFP64)	Q8NI60(CABC1)														Q15910(EZH2)																	Q15181(PPA1)
						Q86V81(THOC4)	Q9H5K3(SGK196)				Q9NPJ4(PNRC2)	Q9NVC6(MED17)	Q8TAA5(GRPEL2)														Q16342(PDCD2)																	Q15329(E2F5)
						Q8IVG1(SMEK1)	Q9H9B1(EHMT1)				Q9NQP4(PFDN4)	Q9NVU0(POLR3E)	Q8TAV3(CYP2W1)														Q16629(SFRS7)																	Q15370(TCEB2)
						Q8IZT6(ASPM)	Q9HD33(MRPL47)				Q9NRF9(POLE3)	Q9NX24(NHP2)	Q8TBR1(RPS2P32)														Q16667(CDKN3)																	Q15375(EPHA7)
						Q8N4F7(RNF175)	Q9NPC3(CCNB1IP1)				Q9NRL5(MRPL1)	Q9NY12(GAR1)	Q8TEQ6(GEMIN5)														Q16678(CYP1B1)																	Q15393(SF3B3)
						Q8NB16(MLKL)	Q9NPD8(UBE2T)				Q9NSD9(FARSB)	Q9NYY3(PLK2)	Q8TEX9(IPO4)														Q16695(HIST3H3)																	Q15398(DLGAP5)
						Q8NBN2(C8orf55)	Q9NPI6(DCP1A)				Q9NTW7(ZFP64)	Q9NZ20(PLA2G3)	Q8WUA4(GTF3C2)														Q86V81(THOC4)																	Q15546(MMD)
						Q8NDM4(TBRG4)	Q9NPJ4(PNRC2)				Q9NVC6(MED17)	Q9NZE3(MEX3C)	Q8WZ75(ROBO4)														Q8IVG1(SMEK1)																	Q15645(TRIP13)
						Q8NI60(CABC1)	Q9NQP4(PFDN4)				Q9NVU0(POLR3E)	Q9NZJ4(SACS)	Q92499(DDX1)														Q8IWK6(GPR125)																	Q15717(ELAVL1)
						Q8TAA5(GRPEL2)	Q9NRF9(POLE3)				Q9NX24(NHP2)	Q9NZW5(MPP6)	Q92598(HSPH1)														Q8IZT6(ASPM)																	Q15906(VPS72)
						Q8TAV3(CYP2W1)	Q9NRL5(MRPL1)				Q9NY12(GAR1)	Q9P0X2(HSPA14)	Q92664(GTF3A)														Q8N4F7(RNF175)																	Q15910(EZH2)
						Q8TBR1(RPS2P32)	Q9NSD9(FARSB)				Q9NYY3(PLK2)	Q9P1U0(ZNRD1)	Q92769(HDAC2)														Q8NB16(MLKL)																	Q16342(PDCD2)
						Q8TEQ6(GEMIN5)	Q9NTW7(ZFP64)				Q9NZ20(PLA2G3)	Q9P2J5(LARS)	Q92830(KAT2A)														Q8NBN2(C8orf55)																	Q16629(SFRS7)
						Q8TEX9(IPO4)	Q9NVC6(MED17)				Q9NZE3(MEX3C)	Q9UBK8(MTRR)	Q92918(MAP4K1)														Q8NDM4(TBRG4)																	Q16667(CDKN3)
						Q8WUA4(GTF3C2)	Q9NVU0(POLR3E)				Q9NZJ4(SACS)	Q9UBP6(METTL1)	Q92922(SMARCC1)														Q8NI60(CABC1)																	Q16678(CYP1B1)
						Q8WZ75(ROBO4)	Q9NX24(NHP2)				Q9NZW5(MPP6)	Q9UFF9(CNOT8)	Q969P6(TOP1MT)														Q8TAA5(GRPEL2)																	Q16695(HIST3H3)
						Q92499(DDX1)	Q9NY12(GAR1)				Q9P0X2(HSPA14)	Q9UGL1(KDM5B)	Q96B26(EXOSC8)														Q8TAV3(CYP2W1)																	Q86V81(THOC4)
						Q92598(HSPH1)	Q9NYY3(PLK2)				Q9P1U0(ZNRD1)	Q9UGN5(PARP2)	Q96BD0(SLCO4A1)														Q8TBR1(RPS2P32)																	Q8IVG1(SMEK1)
						Q92664(GTF3A)	Q9NZ20(PLA2G3)				Q9P2J5(LARS)	Q9UHV9(PFDN2)	Q96DA6(DNAJC19)														Q8TEQ6(GEMIN5)																	Q8IWK6(GPR125)
						Q92769(HDAC2)	Q9NZE3(MEX3C)				Q9UBK8(MTRR)	Q9UIV8(SERPINB13)	Q96E11(MRRF)														Q8TEX9(IPO4)																	Q8IZT6(ASPM)
						Q92830(KAT2A)	Q9NZJ4(SACS)				Q9UBP6(METTL1)	Q9UJ83(HACL1)	Q96EE3(SEH1L)														Q8WUA4(GTF3C2)																	Q8N4F7(RNF175)
						Q92918(MAP4K1)	Q9NZW5(MPP6)				Q9UFF9(CNOT8)	Q9UJA2(CRLS1)	Q96EY1(DNAJA3)														Q8WZ75(ROBO4)																	Q8NB16(MLKL)
						Q92922(SMARCC1)	Q9P0X2(HSPA14)				Q9UGL1(KDM5B)	Q9UJA5(TRMT6)	Q96FF9(CDCA5)														Q92499(DDX1)																	Q8NBN2(C8orf55)
						Q969P6(TOP1MT)	Q9P1U0(ZNRD1)				Q9UGN5(PARP2)	Q9UK45(LSM7)	Q96GC5(MRPL48)														Q92598(HSPH1)																	Q8NDM4(TBRG4)
						Q96B26(EXOSC8)	Q9P2J5(LARS)				Q9UHV9(PFDN2)	Q9UKB3(DNAJC12)	Q96KB5(PBK)														Q92664(GTF3A)																	Q8NES3(LFNG)
						Q96BD0(SLCO4A1)	Q9UBK8(MTRR)				Q9UIV8(SERPINB13)	Q9UKT4(FBXO5)	Q96P44(COL21A1)														Q92769(HDAC2)																	Q8NI60(CABC1)
						Q96DA6(DNAJC19)	Q9UBP6(METTL1)				Q9UJA2(CRLS1)	Q9ULD5(ZNF777)	Q96PZ0(PUS7)														Q92830(KAT2A)																	Q8TAA5(GRPEL2)
						Q96E11(MRRF)	Q9UFF9(CNOT8)				Q9UJA5(TRMT6)	Q9UNX3(RPL26L1)	Q96Q89(KIF20B)														Q92918(MAP4K1)																	Q8TAV3(CYP2W1)
						Q96EE3(SEH1L)	Q9UGL1(KDM5B)				Q9UK45(LSM7)	Q9UQ80(PA2G4)	Q96RK1(CITED4)														Q92922(SMARCC1)																	Q8TBR1(RPS2P32)
						Q96EY1(DNAJA3)	Q9UGN5(PARP2)				Q9UKB3(DNAJC12)	Q9Y237(RPS4X)	Q96RR1(C10orf2)														Q969P6(TOP1MT)																	Q8TEQ6(GEMIN5)
						Q96FF9(CDCA5)	Q9UHV9(PFDN2)				Q9UKT4(FBXO5)	Q9Y265(RUVBL1)	Q96S53(TOE1)														Q96B26(EXOSC8)																	Q8TEX9(IPO4)
						Q96GC5(MRPL48)	Q9UIV8(SERPINB13)				Q9ULD5(ZNF777)	Q9Y2S0(POLR1D)	Q96S55(WRNIP1)														Q96BD0(SLCO4A1)																	Q8WUA4(GTF3C2)
						Q96KB5(PBK)	Q9UJ83(HACL1)				Q9UNX3(RPL26L1)	Q9Y2X3(NOP58)	Q96SB4(SRPK1)														Q96DA6(DNAJC19)																	Q8WZ75(ROBO4)
						Q96P44(COL21A1)	Q9UJA2(CRLS1)				Q9UQ80(PA2G4)	Q9Y333(LSM2)	Q96SQ5(ZNF587)														Q96E11(MRRF)																	Q92499(DDX1)
						Q96PZ0(PUS7)	Q9UJA5(TRMT6)				Q9Y237(RPS4X)	Q9Y399(MRPS2)	Q96T60(PNKP)														Q96EE3(SEH1L)																	Q92598(HSPH1)
						Q96Q89(KIF20B)	Q9UK45(LSM7)				Q9Y265(RUVBL1)	Q9Y3A2(UTP11L)	Q96T88(UHRF1)														Q96EP5(DAZAP1)																	Q92664(GTF3A)
						Q96RK1(CITED4)	Q9UKB3(DNAJC12)				Q9Y2S0(POLR1D)	Q9Y3B4(SF3B14)	Q99575(POP1)														Q96EY1(DNAJA3)																	Q92769(HDAC2)
						Q96RR1(C10orf2)	Q9UKT4(FBXO5)				Q9Y2X3(NOP58)	Q9Y3U8(RPL36)	Q99623(PHB2)														Q96FF9(CDCA5)																	Q92830(KAT2A)
						Q96S53(TOE1)	Q9ULD5(ZNF777)				Q9Y333(LSM2)	Q9Y4Y9(LSM5)	Q99661(KIF2C)														Q96GC5(MRPL48)																	Q92918(MAP4K1)
						Q96S55(WRNIP1)	Q9UNX3(RPL26L1)				Q9Y399(MRPS2)	Q9Y617(PSAT1)	Q99808(SLC29A1)														Q96KB5(PBK)																	Q92922(SMARCC1)
						Q96SB4(SRPK1)	Q9UQ80(PA2G4)				Q9Y3A2(UTP11L)	Q9Y6G3(MRPL42)	Q99829(RBM12)														Q96LW7(C9orf89)																	Q969P6(TOP1MT)
						Q96SQ5(ZNF587)	Q9Y237(RPS4X)				Q9Y3B4(SF3B14)	Q9Y6I4(USP3)	Q99848(EBNA1BP2)														Q96P44(COL21A1)																	Q96B26(EXOSC8)
						Q96T60(PNKP)	Q9Y265(RUVBL1)				Q9Y3U8(RPL36)	Q9Y6J8(STYXL1)	Q9BPZ3()														Q96PZ0(PUS7)																	Q96BD0(SLCO4A1)
						Q96T88(UHRF1)	Q9Y2S0(POLR1D)				Q9Y4Y9(LSM5)		Q9BRJ2(MRPL45)														Q96Q89(KIF20B)																	Q96DA6(DNAJC19)
						Q99575(POP1)	Q9Y2X3(NOP58)				Q9Y617(PSAT1)		Q9BRP1(PDCD2L)														Q96RK1(CITED4)																	Q96E11(MRRF)
						Q99623(PHB2)	Q9Y333(LSM2)				Q9Y6G3(MRPL42)		Q9BVJ6(UTP14A)														Q96RR1(C10orf2)																	Q96EE3(SEH1L)
						Q99661(KIF2C)	Q9Y399(MRPS2)				Q9Y6I4(USP3)		Q9BY08(EBPL)														Q96S53(TOE1)																	Q96EP5(DAZAP1)
						Q99808(SLC29A1)	Q9Y3A2(UTP11L)				Q9Y6J8(STYXL1)		Q9BYD1(MRPL13)														Q96S55(WRNIP1)																	Q96EY1(DNAJA3)
						Q99829(RBM12)	Q9Y3B4(SF3B14)				Q9Y6M9(NDUFB9)		Q9C0K1(SLC39A8)														Q96SB4(SRPK1)																	Q96FF9(CDCA5)
						Q99848(EBNA1BP2)	Q9Y3U8(RPL36)						Q9H0H5(RACGAP1)														Q96SQ5(ZNF587)																	Q96GC5(MRPL48)
						Q9BPZ3()	Q9Y4Y9(LSM5)						Q9H0Y0(RPS23)														Q96T60(PNKP)																	Q96KB5(PBK)
						Q9BRJ2(MRPL45)	Q9Y617(PSAT1)						Q9H0Y1(MRPL15)														Q96T88(UHRF1)																	Q96LW7(C9orf89)
						Q9BRP1(PDCD2L)	Q9Y6G3(MRPL42)						Q9H1A4(ANAPC1)														Q99575(POP1)																	Q96P44(COL21A1)
						Q9BVJ6(UTP14A)	Q9Y6I4(USP3)						Q9H2J7(SLC6A15)														Q99623(PHB2)																	Q96PZ0(PUS7)
						Q9BY08(EBPL)	Q9Y6J8(STYXL1)						Q9H361(PABPC3)														Q99661(KIF2C)																	Q96Q89(KIF20B)
						Q9BYD1(MRPL13)	Q9Y6M9(NDUFB9)						Q9H5K3(SGK196)														Q99808(SLC29A1)																	Q96RK1(CITED4)
						Q9BZX2(UCK2)							Q9H9B1(EHMT1)														Q99829(RBM12)																	Q96RR1(C10orf2)
						Q9C0K1(SLC39A8)							Q9HD33(MRPL47)														Q99848(EBNA1BP2)																	Q96S53(TOE1)
						Q9H0H5(RACGAP1)							Q9NPC3(CCNB1IP1)														Q9BPZ3()																	Q96S55(WRNIP1)
						Q9H0Y0(RPS23)							Q9NPD8(UBE2T)														Q9BRJ2(MRPL45)																	Q96SB4(SRPK1)
						Q9H0Y1(MRPL15)							Q9NPI6(DCP1A)														Q9BRP1(PDCD2L)																	Q96SQ5(ZNF587)
						Q9H1A4(ANAPC1)							Q9NPJ4(PNRC2)														Q9BVJ6(UTP14A)																	Q96T60(PNKP)
						Q9H2J7(SLC6A15)							Q9NQP4(PFDN4)														Q9BY08(EBPL)																	Q96T88(UHRF1)
						Q9H361(PABPC3)							Q9NRF9(POLE3)														Q9BYD1(MRPL13)																	Q99575(POP1)
						Q9H5K3(SGK196)							Q9NRL5(MRPL1)														Q9C0K1(SLC39A8)																	Q99623(PHB2)
						Q9H9B1(EHMT1)							Q9NSD9(FARSB)														Q9H0H5(RACGAP1)																	Q99661(KIF2C)
						Q9HD33(MRPL47)							Q9NTW7(ZFP64)														Q9H0Y0(RPS23)																	Q99808(SLC29A1)
						Q9NPC3(CCNB1IP1)							Q9NVC6(MED17)														Q9H0Y1(MRPL15)																	Q99829(RBM12)
						Q9NPD8(UBE2T)							Q9NVU0(POLR3E)														Q9H1A4(ANAPC1)																	Q99848(EBNA1BP2)
						Q9NPH9(IL26)							Q9NX24(NHP2)														Q9H2J7(SLC6A15)																	Q9BPZ3()
						Q9NPI6(DCP1A)							Q9NX57(RAB20)														Q9H361(PABPC3)																	Q9BRJ2(MRPL45)
						Q9NPJ4(PNRC2)							Q9NY12(GAR1)														Q9H5K3(SGK196)																	Q9BRP1(PDCD2L)
						Q9NQP4(PFDN4)							Q9NYY3(PLK2)														Q9H9B1(EHMT1)																	Q9BVJ6(UTP14A)
						Q9NRF9(POLE3)							Q9NZ20(PLA2G3)														Q9HD33(MRPL47)																	Q9BXP5(SRRT)
						Q9NRL5(MRPL1)							Q9NZE3(MEX3C)														Q9NPC3(CCNB1IP1)																	Q9BY08(EBPL)
						Q9NSD9(FARSB)							Q9NZJ4(SACS)														Q9NPD8(UBE2T)																	Q9BYD1(MRPL13)
						Q9NTW7(ZFP64)							Q9NZW5(MPP6)														Q9NPH9(IL26)																	Q9BZX2(UCK2)
						Q9NVC6(MED17)							Q9P0X2(HSPA14)														Q9NPI6(DCP1A)																	Q9C0K1(SLC39A8)
						Q9NVU0(POLR3E)							Q9P1U0(ZNRD1)														Q9NPJ4(PNRC2)																	Q9H0H5(RACGAP1)
						Q9NX24(NHP2)							Q9P288(BCCIP)														Q9NQP4(PFDN4)																	Q9H0Y0(RPS23)
						Q9NX57(RAB20)							Q9P2J5(LARS)														Q9NRF9(POLE3)																	Q9H0Y1(MRPL15)
						Q9NY12(GAR1)							Q9P2N5(RBM27)														Q9NRL5(MRPL1)																	Q9H1A4(ANAPC1)
						Q9NYY3(PLK2)							Q9UBK8(MTRR)														Q9NRR8(CDC42SE1)																	Q9H2J7(SLC6A15)
						Q9NZ20(PLA2G3)							Q9UBP6(METTL1)														Q9NSD9(FARSB)																	Q9H361(PABPC3)
						Q9NZE3(MEX3C)							Q9UFF9(CNOT8)														Q9NTW7(ZFP64)																	Q9H5K3(SGK196)
						Q9NZJ4(SACS)							Q9UGL1(KDM5B)														Q9NVC6(MED17)																	Q9H9B1(EHMT1)
						Q9NZW5(MPP6)							Q9UGN5(PARP2)														Q9NVU0(POLR3E)																	Q9HD33(MRPL47)
						Q9P0X2(HSPA14)							Q9UHV9(PFDN2)														Q9NX24(NHP2)																	Q9NPC3(CCNB1IP1)
						Q9P1U0(ZNRD1)							Q9UIV8(SERPINB13)														Q9NX57(RAB20)																	Q9NPD8(UBE2T)
						Q9P288(BCCIP)							Q9UJA2(CRLS1)														Q9NY12(GAR1)																	Q9NPH9(IL26)
						Q9P2J5(LARS)							Q9UJA5(TRMT6)														Q9NYY3(PLK2)																	Q9NPI6(DCP1A)
						Q9P2N5(RBM27)							Q9UK45(LSM7)														Q9NZ20(PLA2G3)																	Q9NPJ4(PNRC2)
						Q9UBK8(MTRR)							Q9UKB3(DNAJC12)														Q9NZE3(MEX3C)																	Q9NQP4(PFDN4)
						Q9UBP6(METTL1)							Q9UKK6(NXT1)														Q9NZJ4(SACS)																	Q9NRF9(POLE3)
						Q9UFF9(CNOT8)							Q9UKT4(FBXO5)														Q9NZW5(MPP6)																	Q9NRL5(MRPL1)
						Q9UGL1(KDM5B)							Q9UL69(C13orf15)														Q9P0X2(HSPA14)																	Q9NRR8(CDC42SE1)
						Q9UGN5(PARP2)							Q9ULD5(ZNF777)														Q9P1U0(ZNRD1)																	Q9NSD9(FARSB)
						Q9UHV9(PFDN2)							Q9ULW0(TPX2)														Q9P288(BCCIP)																	Q9NTW7(ZFP64)
						Q9UIV8(SERPINB13)							Q9UNX3(RPL26L1)														Q9P2J5(LARS)																	Q9NVC6(MED17)
						Q9UJ83(HACL1)							Q9UQ80(PA2G4)														Q9P2N5(RBM27)																	Q9NVU0(POLR3E)
						Q9UJA2(CRLS1)							Q9Y237(RPS4X)														Q9UBK8(MTRR)																	Q9NX24(NHP2)
						Q9UJA5(TRMT6)							Q9Y265(RUVBL1)														Q9UBP6(METTL1)																	Q9NX57(RAB20)
						Q9UK45(LSM7)							Q9Y289(SLC5A6)														Q9UFF9(CNOT8)																	Q9NY12(GAR1)
						Q9UKB3(DNAJC12)							Q9Y2S0(POLR1D)														Q9UGL1(KDM5B)																	Q9NYK5(MRPL39)
						Q9UKK6(NXT1)							Q9Y2X3(NOP58)														Q9UGN5(PARP2)																	Q9NYP9(C21orf45)
						Q9UKT4(FBXO5)							Q9Y333(LSM2)														Q9UHV9(PFDN2)																	Q9NYY3(PLK2)
						Q9UL69(C13orf15)							Q9Y399(MRPS2)														Q9UIV8(SERPINB13)																	Q9NZ20(PLA2G3)
						Q9ULD5(ZNF777)							Q9Y3A2(UTP11L)														Q9UJA2(CRLS1)																	Q9NZE3(MEX3C)
						Q9ULW0(TPX2)							Q9Y3B4(SF3B14)														Q9UJA5(TRMT6)																	Q9NZJ4(SACS)
						Q9UNX3(RPL26L1)							Q9Y3U8(RPL36)														Q9UK45(LSM7)																	Q9NZW5(MPP6)
						Q9UQ80(PA2G4)							Q9Y4Y9(LSM5)														Q9UKB3(DNAJC12)																	Q9P0X2(HSPA14)
						Q9Y237(RPS4X)							Q9Y5J7(TIMM9)														Q9UKK6(NXT1)																	Q9P1U0(ZNRD1)
						Q9Y265(RUVBL1)							Q9Y5L4(TIMM13)														Q9UKT4(FBXO5)																	Q9P288(BCCIP)
						Q9Y289(SLC5A6)							Q9Y5X3(SNX5)														Q9UL69(C13orf15)																	Q9P2J5(LARS)
						Q9Y2S0(POLR1D)							Q9Y613(FHOD1)														Q9ULD5(ZNF777)																	Q9P2N5(RBM27)
						Q9Y2X3(NOP58)							Q9Y617(PSAT1)														Q9ULW0(TPX2)																	Q9UBK8(MTRR)
						Q9Y333(LSM2)							Q9Y6G3(MRPL42)														Q9UNX3(RPL26L1)																	Q9UBP6(METTL1)
						Q9Y399(MRPS2)							Q9Y6I4(USP3)														Q9UQ80(PA2G4)																	Q9UFF9(CNOT8)
						Q9Y3A2(UTP11L)							Q9Y6J8(STYXL1)														Q9Y237(RPS4X)																	Q9UGL1(KDM5B)
						Q9Y3B4(SF3B14)							Q9Y6M9(NDUFB9)														Q9Y265(RUVBL1)																	Q9UGN5(PARP2)
						Q9Y3U8(RPL36)							Q9Y6Y8(SEC23IP)														Q9Y289(SLC5A6)																	Q9UHV9(PFDN2)
						Q9Y4Y9(LSM5)																					Q9Y2S0(POLR1D)																	Q9UIV8(SERPINB13)
						Q9Y5A9(YTHDF2)																					Q9Y2X3(NOP58)																	Q9UJ83(HACL1)
						Q9Y5J7(TIMM9)																					Q9Y333(LSM2)																	Q9UJA2(CRLS1)
						Q9Y5L4(TIMM13)																					Q9Y399(MRPS2)																	Q9UJA5(TRMT6)
						Q9Y5X3(SNX5)																					Q9Y3A2(UTP11L)																	Q9UK45(LSM7)
						Q9Y613(FHOD1)																					Q9Y3B4(SF3B14)																	Q9UKB3(DNAJC12)
						Q9Y617(PSAT1)																					Q9Y3U8(RPL36)																	Q9UKK6(NXT1)
						Q9Y6G3(MRPL42)																					Q9Y4Y9(LSM5)																	Q9UKT4(FBXO5)
						Q9Y6I4(USP3)																					Q9Y5J7(TIMM9)																	Q9UL69(C13orf15)
						Q9Y6J8(STYXL1)																					Q9Y5L4(TIMM13)																	Q9ULD5(ZNF777)
						Q9Y6M9(NDUFB9)																					Q9Y5X3(SNX5)																	Q9ULW0(TPX2)
						Q9Y6Y8(SEC23IP)																					Q9Y613(FHOD1)																	Q9UNX3(RPL26L1)
																											Q9Y617(PSAT1)																	Q9UQ80(PA2G4)
																											Q9Y6G3(MRPL42)																	Q9Y237(RPS4X)
																											Q9Y6I4(USP3)																	Q9Y265(RUVBL1)
																											Q9Y6J8(STYXL1)																	Q9Y289(SLC5A6)
																											Q9Y6M9(NDUFB9)																	Q9Y2S0(POLR1D)
																											Q9Y6Y8(SEC23IP)																	Q9Y2X3(NOP58)
																																												Q9Y333(LSM2)
																																												Q9Y399(MRPS2)
																																												Q9Y3A2(UTP11L)
																																												Q9Y3B4(SF3B14)
																																												Q9Y3U8(RPL36)
																																												Q9Y4Y9(LSM5)
																																												Q9Y512(SAMM50)
																																												Q9Y5A9(YTHDF2)
																																												Q9Y5J7(TIMM9)
																																												Q9Y5L4(TIMM13)
																																												Q9Y5X3(SNX5)
																																												Q9Y613(FHOD1)
																																												Q9Y617(PSAT1)
																																												Q9Y6G3(MRPL42)
																																												Q9Y6I4(USP3)
																																												Q9Y6J8(STYXL1)
																																												Q9Y6M9(NDUFB9)
																																												Q9Y6Y8(SEC23IP)
[truncated: 44 more columns]

## Sheet: Repressed by MYCN-ER
	Biological process terms												Function terms							Component terms
GO term ID	GO:0048513	GO:0007275	GO:0007154	GO:0001501	GO:0007165	GO:0050789	GO:0009653	GO:0050794	GO:0007243			GO term ID	GO:0005515	GO:0046870	GO:0005507	GO:0003674			GO term ID	GO:0005576	GO:0005575	GO:0005583	GO:0005581	GO:0031012
GO term description	organ development	development	cell communication	skeletal development	signal transduction	regulation of biological process	morphogenesis	regulation of cellular process	protein kinase cascade			GO term description	protein binding	cadmium ion binding	copper ion binding	molecular_function			GO term description	extracellular region	cellular_component	fibrillar collagen	collagen	extracellular matrix
P-value (Bonferroni-corrected)	3.075e-09	1.842e-05	5.25e-05	8.101e-05	0.001459	0.002015	0.002457	0.003868	0.005785			P-value (Bonferroni-corrected)	9.784e-07	0.002527	0.008821	0.009124			P-value (Bonferroni-corrected)	1.465e-06	5.719e-05	0.001018	0.003624	0.008743
Member genes	O00300(TNFRSF11B)	O00300(TNFRSF11B)	O00300(TNFRSF11B)	O00300(TNFRSF11B)	O00300(TNFRSF11B)	O00622(CYR61)	O00622(CYR61)	O00622(CYR61)	O14508(SOCS2)			Member genes	O00159(MYO1C)	P04732(MT1E)	P04732(MT1E)	O00159(MYO1C)			Member genes	O00300(TNFRSF11B)	O00159(MYO1C)	P02452(COL1A1)	P02452(COL1A1)	P01033(TIMP1)
	O14944(EREG)	O00622(CYR61)	O00592(PODXL)	O15119(TBX3)	O14508(SOCS2)	O14508(SOCS2)	O14508(SOCS2)	O14508(SOCS2)	O14543(SOCS3)				O00291(HIP1)	P13640(MT1G)	P09486(SPARC)	O00291(HIP1)				O00622(CYR61)	O00290(RRAGA)	P02461(COL3A1)	P02461(COL3A1)	P02452(COL1A1)
	O15119(TBX3)	O14508(SOCS2)	O00622(CYR61)	O95340(PAPSS2)	O14543(SOCS3)	O14519(CDK2AP1)	O14543(SOCS3)	O14519(CDK2AP1)	O14544(SOCS6)				O00300(TNFRSF11B)	P80294(MT1H)	P13640(MT1G)	O00300(TNFRSF11B)				O14944(EREG)	O00291(HIP1)	P05997(COL5A2)	P05997(COL5A2)	P02461(COL3A1)
	O43597(SPRY2)	O14543(SOCS3)	O14508(SOCS2)	P01344(CDYL2)	O14544(SOCS6)	O14543(SOCS3)	O14544(SOCS6)	O14543(SOCS3)	O43353(RIPK2)				O00622(CYR61)	P80297(MT1X)	P19021(PAM)	O00483(NDUFA4)				O60565(GREM1)	O00300(TNFRSF11B)	P08123(COL1A2)	P08123(COL1A2)	P02751(FN1)
	O95340(PAPSS2)	O14544(SOCS6)	O14543(SOCS3)	P02452(COL1A1)	O14944(EREG)	O14544(SOCS6)	O14944(EREG)	O14544(SOCS6)	P01133(EGF)				O14508(SOCS2)		P28300(LOX)	O00622(CYR61)				O94907(DKK1)	O00483(NDUFA4)	P12107(COL11A1)	P12107(COL11A1)	P03956(MMP1)
	P01033(TIMP1)	O14944(EREG)	O14544(SOCS6)	P07355(ANXA2)	O15105(SMAD7)	O14771(ZNF213)	O15119(TBX3)	O14771(ZNF213)	P08134(RHOC)				O14944(EREG)		P80294(MT1H)	O14508(SOCS2)				P00749(PLAU)	O00592(PODXL)		P12111(COL6A3)	P05997(COL5A2)
	P01344(CDYL2)	O15119(TBX3)	O14944(EREG)	P08123(COL1A2)	O15463(ARHGAP29)	O14944(EREG)	O43597(SPRY2)	O14944(EREG)	P09038(FGF2)				O15105(SMAD7)		P80297(MT1X)	O14519(CDK2AP1)				P00750(PLAT)	O00622(CYR61)		Q02388(COL7A1)	P08123(COL1A2)
	P02452(COL1A1)	O43597(SPRY2)	O15105(SMAD7)	P09486(SPARC)	O43353(RIPK2)	O15105(SMAD7)	P01033(TIMP1)	O15105(SMAD7)	P11362(FGFR1)				O15209(ZBTB22)		Q08397(LOXL1)	O14543(SOCS3)				P01033(TIMP1)	O14508(SOCS2)			P08254(MMP3)
	P02461(COL3A1)	O60565(GREM1)	O15463(ARHGAP29)	P11362(FGFR1)	O43597(SPRY2)	O15119(TBX3)	P02461(COL3A1)	O15119(TBX3)	P13500(CCL2)				O15460(P4HA2)			O14771(ZNF213)				P01133(EGF)	O14519(CDK2AP1)			P09486(SPARC)
	P04626(ERBB2)	O76011(KRT34)	O43353(RIPK2)	P12107(COL11A1)	O75962(TRIO)	O15209(ZBTB22)	P03372(ESR1)	O15209(ZBTB22)	P21333(FLNA)				O43353(RIPK2)			O14944(EREG)				P01344(CDYL2)	O14544(SOCS6)			P12107(COL11A1)
	P07288(KLK3)	O94907(DKK1)	O43597(SPRY2)	P22692(IGFBP4)	O94907(DKK1)	O43353(RIPK2)	P04626(ERBB2)	O43353(RIPK2)	Q15208(STK38)				O43889(CREB3)			O15105(SMAD7)				P02452(COL1A1)	O14771(ZNF213)			P12111(COL6A3)
	P07355(ANXA2)	O95340(PAPSS2)	O75962(TRIO)	P55287(CDH11)	O95661(DIRAS3)	O43597(SPRY2)	P07288(KLK3)	O43597(SPRY2)	Q15628(TRADD)				O60565(GREM1)			O15119(TBX3)				P02461(COL3A1)	O14828(SCAMP3)			P17600(SYN1)
	P08123(COL1A2)	O95661(DIRAS3)	O94907(DKK1)	Q13103(SPP2)	P00749(PLAU)	O43889(CREB3)	P09038(FGF2)	O43889(CREB3)	Q7Z435(CC2D1A)				O75840(KLF7)			O15209(ZBTB22)				P02751(FN1)	O14944(EREG)			P23142(FBLN1)
	P09038(FGF2)	P01033(TIMP1)	O95206(PCDH8)	Q15699(ALX1)	P01133(EGF)	O60238(BNIP3L)	P10275(AR)	O60238(BNIP3L)	Q92633(LPAR1)				O75915(ARL6IP5)			O15255(FAM127A)				P03956(MMP1)	O15105(SMAD7)			P24821(TNC)
	P09486(SPARC)	P01344(CDYL2)	O95661(DIRAS3)	Q16394(EXT1)	P01344(CDYL2)	O75362(ZNF217)	P11362(FGFR1)	O75362(ZNF217)	Q92734(TFG)				O75953(DNAJB5)			O15393(TMPRSS2)				P05121(SERPINE1)	O15119(TBX3)			P28300(LOX)
	P09493(TPM1)	P02452(COL1A1)	P00749(PLAU)	Q93063(EXT2)	P02751(FN1)	O75840(KLF7)	P13500(CCL2)	O75840(KLF7)	Q92918(MAP4K1)				O75955(FLOT1)			O15438(ABCC3)				P05155(SERPING1)	O15209(ZBTB22)			P48307(TFPI2)
	P10275(AR)	P02461(COL3A1)	P01133(EGF)		P03372(ESR1)	O94885(SASH1)	P15144(ANPEP)	O94885(SASH1)	Q9H2X6(HIPK2)				O75970(MPDZ)			O15460(P4HA2)				P05161(ISG15)	O15255(FAM127A)			Q02388(COL7A1)
	P11362(FGFR1)	P03372(ESR1)	P01344(CDYL2)		P04626(ERBB2)	O94907(DKK1)	P17301(ITGA2)	O94907(DKK1)	Q9NRM7(LATS2)				O94855(SEC24D)			O15463(ARHGAP29)				P05305(EDN1)	O15393(TMPRSS2)			Q14112(NID2)
	P12107(COL11A1)	P04626(ERBB2)	P02751(FN1)		P05305(EDN1)	O95661(DIRAS3)	P17936(IGFBP3)	O95661(DIRAS3)	Q9UQF2(MAPK8IP1)				O94907(DKK1)			O43237(DYNC1LI2)				P05997(COL5A2)	O15438(ABCC3)			Q15582(TGFBI)
	P12111(COL6A3)	P07093(SERPINE2)	P03372(ESR1)		P05408(SCG5)	O95980(RECK)	P22692(IGFBP4)	O95980(RECK)	Q9Y4K4(MAP4K5)				O95198(KLHL2)			O43353(RIPK2)				P06276(BCHE)	O15460(P4HA2)			Q16585(SGCB)
	P13500(CCL2)	P07288(KLK3)	P04626(ERBB2)		P06756(ITGAV)	P00749(PLAU)	P40123(CAP2)	P01033(TIMP1)					O95206(PCDH8)			O43889(CREB3)				P07093(SERPINE2)	O43237(DYNC1LI2)			Q86TH1(ADAMTSL2)
	P15144(ANPEP)	P07355(ANXA2)	P05161(ISG15)		P08123(COL1A2)	P01033(TIMP1)	P49767(VEGFC)	P01106()					P01106()			O60423(ATP8B3)				P07288(KLK3)	O43353(RIPK2)			Q8NFP9(NBEA)
	P17301(ITGA2)	P07996(THBS1)	P05305(EDN1)		P08134(RHOC)	P01106()	Q01860(ASH1L)	P01133(EGF)					P01133(EGF)			O60507(TPST1)				P07996(THBS1)	O43597(SPRY2)			Q9HCU0(CD248)
	P17936(IGFBP3)	P08123(COL1A2)	P05408(SCG5)		P09038(FGF2)	P01133(EGF)	Q03169(TNFAIP2)	P01344(CDYL2)					P01344(CDYL2)			O60513(B4GALT4)				P08123(COL1A2)	O43889(CREB3)
	P20809(IL11)	P09038(FGF2)	P06756(ITGAV)		P09341(CXCL1)	P01344(CDYL2)	Q08117(AES)	P03372(ESR1)					P02751(FN1)			O60565(GREM1)				P08254(MMP3)	O60238(BNIP3L)
	P22692(IGFBP4)	P09341(CXCL1)	P07996(THBS1)		P09486(SPARC)	P03372(ESR1)	Q14332(FZD2)	P05305(EDN1)					P03372(ESR1)			O75362(ZNF217)				P09038(FGF2)	O60423(ATP8B3)
	P24844(MYL9)	P09486(SPARC)	P08123(COL1A2)		P09619(PDGFRB)	P05305(EDN1)	Q14686(NCOA6)	P07093(SERPINE2)					P04626(ERBB2)			O75828(CBR3)				P09341(CXCL1)	O60507(TPST1)
	P49767(VEGFC)	P09493(TPM1)	P08134(RHOC)		P10275(AR)	P05408(SCG5)	Q16270(IGFBP7)	P08134(RHOC)					P05161(ISG15)			O75840(KLF7)				P09486(SPARC)	O60513(B4GALT4)
	P55287(CDH11)	P10275(AR)	P09038(FGF2)		P10589(NR2F1)	P07093(SERPINE2)	Q96QB1(DLC1)	P09038(FGF2)					P05305(EDN1)			O75915(ARL6IP5)				P12107(COL11A1)	O60565(GREM1)
	Q03169(TNFAIP2)	P11362(FGFR1)	P09341(CXCL1)		P11362(FGFR1)	P08134(RHOC)	Q99814(EPAS1)	P09341(CXCL1)					P05408(SCG5)			O75953(DNAJB5)				P12111(COL6A3)	O60664(M6PRBP1)
	Q05682(CALD1)	P12107(COL11A1)	P09486(SPARC)		P11388(TOP2A)	P08758(ANXA5)	Q9NQ30(ESM1)	P10275(AR)					P06276(BCHE)			O75955(FLOT1)				P13500(CCL2)	O75362(ZNF217)
	Q08117(AES)	P12111(COL6A3)	P09619(PDGFRB)		P11473(VDR)	P09038(FGF2)	Q9Y5J3(HEY1)	P10589(NR2F1)					P06756(ITGAV)			O75962(TRIO)				P17600(SYN1)	O75828(CBR3)
	Q13103(SPP2)	P13500(CCL2)	P10275(AR)		P11717(IGF2R)	P09341(CXCL1)		P11473(VDR)					P07355(ANXA2)			O75970(MPDZ)				P17936(IGFBP3)	O75840(KLF7)
	Q14686(NCOA6)	P15144(ANPEP)	P10589(NR2F1)		P13500(CCL2)	P09493(TPM1)		P13500(CCL2)					P07737(PFN1)			O76011(KRT34)				P19883(FST)	O75915(ARL6IP5)
	Q15699(ALX1)	P15924(DSP)	P11362(FGFR1)		P13987(CD59)	P10275(AR)		P17861(XBP1)					P07996(THBS1)			O94851(MICAL2)				P20809(IL11)	O75955(FLOT1)
	Q15772(SPEG)	P17301(ITGA2)	P11388(TOP2A)		P15153(RAC2)	P10589(NR2F1)		P17936(IGFBP3)					P08107(HSPA1A)			O94855(SEC24D)				P22466(GAL)	O75970(MPDZ)
	Q16394(EXT1)	P17936(IGFBP3)	P11473(VDR)		P16234(PDGFRA)	P11473(VDR)		P18146(EGR1)					P08758(ANXA5)			O94907(DKK1)				P22692(IGFBP4)	O76011(KRT34)
	Q16585(SGCB)	P19883(FST)	P11717(IGF2R)		P17301(ITGA2)	P13500(CCL2)		P19883(FST)					P09038(FGF2)			O94919(ENDOD1)				P23142(FBLN1)	O94851(MICAL2)
	Q92918(MAP4K1)	P20809(IL11)	P12107(COL11A1)		P17936(IGFBP3)	P17861(XBP1)		P20809(IL11)					P09341(CXCL1)			O94925(GLS)				P24821(TNC)	O94855(SEC24D)
	Q93063(EXT2)	P21333(FLNA)	P12111(COL6A3)		P20337(RAB3B)	P17936(IGFBP3)		P21333(FLNA)					P09486(SPARC)			O95084(PRSS23)				P28300(LOX)	O94907(DKK1)
	Q99814(EPAS1)	P22692(IGFBP4)	P13500(CCL2)		P20339(RAB5A)	P18146(EGR1)		P22692(IGFBP4)					P09493(TPM1)			O95198(KLHL2)				P35318(ADM)	O94925(GLS)
	Q9P246(STIM2)	P23219(PTGS1)	P13987(CD59)		P21333(FLNA)	P19883(FST)		P26583(HMGB2)					P10275(AR)			O95204(PITRM1)				P48061(CXCL12)	O95198(KLHL2)
	Q9UQL6(HDAC5)	P23560(BDNF)	P15153(RAC2)		P21453(S1PR1)	P20809(IL11)		P27816(MAP4)					P10589(NR2F1)			O95206(PCDH8)				P48307(TFPI2)	O95206(PCDH8)
	Q9Y5J3(HEY1)	P24844(MYL9)	P16234(PDGFRA)		P22466(GAL)	P21333(FLNA)		P33981(TTK)					P11362(FGFR1)			O95340(PAPSS2)				Q02388(COL7A1)	O95340(PAPSS2)
		P40123(CAP2)	P17301(ITGA2)		P22692(IGFBP4)	P22692(IGFBP4)		P35241(RDX)					P11473(VDR)			O95563(BRP44)				Q03169(TNFAIP2)	O95820(SLC22A8)
		P41134(ID1)	P17600(SYN1)		P23229(ITGA6)	P24844(MYL9)		P35713(SOX18)					P12107(COL11A1)			O95661(DIRAS3)				Q08397(LOXL1)	O95864(FADS2)
		P49767(VEGFC)	P17936(IGFBP3)		P26583(HMGB2)	P26583(HMGB2)		P41134(ID1)					P12111(COL6A3)			O95686(PPP1R3C)				Q12841(FSTL1)	O95980(RECK)
		P52926(HMGA2)	P19022(CDH2)		P28300(LOX)	P27816(MAP4)		P42574(CASP3)					P13500(CCL2)			O95820(SLC22A8)				Q13103(SPP2)	P00352(ALDH1A1)
		P53805(RCAN1)	P19883(FST)		P30559(OXTR)	P33981(TTK)		P46013(MKI67)					P13796(LCP1)			O95864(FADS2)				Q14112(NID2)	P00749(PLAU)
		P55287(CDH11)	P20337(RAB3B)		P35249(EIF4A2)	P35241(RDX)		P46940(IQGAP1)					P13797(PLS3)			O95980(RECK)				Q14563(SEMA3A)	P00750(PLAT)
		Q01860(ASH1L)	P20339(RAB5A)		P35318(ADM)	P35713(SOX18)		P47928(ID4)					P13987(CD59)			P00352(ALDH1A1)				Q15582(TGFBI)	P01033(TIMP1)
		Q01954(BNC1)	P20809(IL11)		P36405(ARL3)	P40123(CAP2)		P48061(CXCL12)					P15153(RAC2)			P00749(PLAU)				Q16270(IGFBP7)	P01106()
		Q02363(ID2)	P21333(FLNA)		P40123(CAP2)	P41134(ID1)		P49767(VEGFC)					P16104(H2AFX)			P00750(PLAT)				Q16585(SGCB)	P01133(EGF)
		Q02388(COL7A1)	P21453(S1PR1)		P40189(IL6ST)	P42574(CASP3)		P51397(DAP)					P17301(ITGA2)			P01033(TIMP1)				Q16739(UGCG)	P01344(CDYL2)
		Q03169(TNFAIP2)	P22413(ENPP1)		P45877(PPIC)	P46013(MKI67)		P52789(TNFAIP1)					P17600(SYN1)			P01106()				Q8IWU6(SULF1)	P01889(HLA-B)
		Q04900(CD164)	P22466(GAL)		P46940(IQGAP1)	P46940(IQGAP1)		P52926(HMGA2)					P17927(CR1)			P01133(EGF)				Q8NFP9(NBEA)	P02452(COL1A1)
		Q05682(CALD1)	P22692(IGFBP4)		P48061(CXCL12)	P47928(ID4)		Q01860(ASH1L)					P17936(IGFBP3)			P01344(CDYL2)				Q9BZF9(UACA)	P02461(COL3A1)
		Q08117(AES)	P23229(ITGA6)		P49767(VEGFC)	P48061(CXCL12)		Q01954(BNC1)					P19021(PAM)			P01889(HLA-B)				Q9H1J7(WNT5B)	P02751(FN1)
		Q12830(BPTF)	P24821(TNC)		P53805(RCAN1)	P49767(VEGFC)		Q02363(ID2)					P19022(CDH2)			P02452(COL1A1)				Q9HCU0(CD248)	P03372(ESR1)
		Q13103(SPP2)	P26583(HMGB2)		P78552(IL13RA1)	P51397(DAP)		Q04727(TLE4)					P19883(FST)			P02461(COL3A1)				Q9NQ30(ESM1)	P03956(MMP1)
		Q14332(FZD2)	P28300(LOX)		Q04727(TLE4)	P51911(CNN1)		Q04900(CD164)					P20339(RAB5A)			P02751(FN1)				Q9NZH8(IL1F9)	P04181(OAT)
		Q14563(SEMA3A)	P30559(OXTR)		Q04900(CD164)	P52789(TNFAIP1)		Q08117(AES)					P20809(IL11)			P03372(ESR1)				Q9UHG2(PCSK1N)	P04626(ERBB2)
		Q14686(NCOA6)	P35249(EIF4A2)		Q07343(PDE4B)	P52926(HMGA2)		Q12830(BPTF)					P21333(FLNA)			P03956(MMP1)				Q9UK05(GDF2)	P04732(MT1E)
		Q15699(ALX1)	P35318(ADM)		Q08117(AES)	Q01860(ASH1L)		Q14211(NFIL3)					P22466(GAL)			P04181(OAT)				Q9Y6X7(MPRIP)	P04843(RPN1)
		Q15772(SPEG)	P36405(ARL3)		Q13164(MAPK7)	Q01954(BNC1)		Q14686(NCOA6)					P22692(IGFBP4)			P04626(ERBB2)					P05121(SERPINE1)
		Q16270(IGFBP7)	P40123(CAP2)		Q14332(FZD2)	Q02363(ID2)		Q15170(TCEAL1)					P23229(ITGA6)			P04732(MT1E)					P05155(SERPING1)
		Q16394(EXT1)	P40189(IL6ST)		Q14686(NCOA6)	Q04727(TLE4)		Q15582(TGFBI)					P23560(BDNF)			P04843(RPN1)					P05161(ISG15)
		Q16585(SGCB)	P45877(PPIC)		Q15147(PLCB4)	Q04900(CD164)		Q15628(TRADD)					P24821(TNC)			P05121(SERPINE1)					P05305(EDN1)
		Q16739(UGCG)	P46940(IQGAP1)		Q15208(STK38)	Q08117(AES)		Q15699(ALX1)					P26038(MSN)			P05155(SERPING1)					P05408(SCG5)
		Q92918(MAP4K1)	P48061(CXCL12)		Q15628(TRADD)	Q12830(BPTF)		Q15772(SPEG)					P35241(RDX)			P05161(ISG15)					P05997(COL5A2)
		Q93045(STMN2)	P49767(VEGFC)		Q16394(EXT1)	Q14211(NFIL3)		Q16236(NFE2L2)					P35249(EIF4A2)			P05305(EDN1)					P06276(BCHE)
		Q93063(EXT2)	P53805(RCAN1)		Q7Z435(CC2D1A)	Q14686(NCOA6)		Q16270(IGFBP7)					P35318(ADM)			P05408(SCG5)					P06756(ITGAV)
		Q96QB1(DLC1)	P55287(CDH11)		Q7Z5R6(APBB1IP)	Q15170(TCEAL1)		Q16394(EXT1)					P40189(IL6ST)			P05997(COL5A2)					P07093(SERPINE2)
		Q99814(EPAS1)	P78552(IL13RA1)		Q8N752(CSNK1A1L)	Q15582(TGFBI)		Q16514(TAF12)					P42574(CASP3)			P06276(BCHE)					P07288(KLK3)
		Q9H1J7(WNT5B)	Q02388(COL7A1)		Q92633(LPAR1)	Q15628(TRADD)		Q7Z435(CC2D1A)					P45877(PPIC)			P06756(ITGAV)					P07355(ANXA2)
		Q9NPE2(NGRN)	Q04727(TLE4)		Q92734(TFG)	Q15699(ALX1)		Q86SJ2(AMIGO2)					P46013(MKI67)			P07093(SERPINE2)					P07686(HEXB)
		Q9NQ30(ESM1)	Q04900(CD164)		Q92918(MAP4K1)	Q15772(SPEG)		Q86UP3(ZFHX4)					P46940(IQGAP1)			P07288(KLK3)					P07737(PFN1)
		Q9P246(STIM2)	Q07343(PDE4B)		Q92963(RIT1)	Q16236(NFE2L2)		Q8IUR6(C5orf41)					P47928(ID4)			P07355(ANXA2)					P07996(THBS1)
		Q9UQL6(HDAC5)	Q08117(AES)		Q93045(STMN2)	Q16270(IGFBP7)		Q8NF99(ZNF397OS)					P48061(CXCL12)			P07686(HEXB)					P08107(HSPA1A)
		Q9Y5J3(HEY1)	Q13164(MAPK7)		Q93063(EXT2)	Q16394(EXT1)		Q8TAQ2(SMARCC2)					P48634(BAT2)			P07737(PFN1)					P08123(COL1A2)
			Q14112(NID2)		Q96Q27(ASB2)	Q16514(TAF12)		Q92633(LPAR1)					P49767(VEGFC)			P07996(THBS1)					P08254(MMP3)
			Q14332(FZD2)		Q96QB1(DLC1)	Q7Z435(CC2D1A)		Q92734(TFG)					P51636(CAV2)			P08107(HSPA1A)					P08962(CD63)
			Q14686(NCOA6)		Q99814(EPAS1)	Q86SJ2(AMIGO2)		Q92918(MAP4K1)					P51911(CNN1)			P08123(COL1A2)					P09038(FGF2)
			Q15147(PLCB4)		Q9BQE4(SELS)	Q86UP3(ZFHX4)		Q93063(EXT2)					P53611(RABGGTB)			P08134(RHOC)					P09341(CXCL1)
			Q15208(STK38)		Q9H1J7(WNT5B)	Q8IUR6(C5orf41)		Q969S8(HDAC10)					P53621(COPA)			P08254(MMP3)					P09486(SPARC)
			Q15582(TGFBI)		Q9H2L5(RASSF4)	Q8NF99(ZNF397OS)		Q96JM2(ZNF462)					P55287(CDH11)			P08758(ANXA5)					P09493(TPM1)
			Q15628(TRADD)		Q9H2X6(HIPK2)	Q8TAQ2(SMARCC2)		Q96QB1(DLC1)					P80294(MT1H)			P09038(FGF2)					P09619(PDGFRB)
			Q15878(CACNA1E)		Q9HC97(GPR35)	Q92633(LPAR1)		Q96SZ4(ZSCAN10)					Q00610(CLTC)			P09341(CXCL1)					P10275(AR)
			Q16394(EXT1)		Q9HD67(MYO10)	Q92734(TFG)		Q99684(GFI1)					Q01860(ASH1L)			P09486(SPARC)					P10589(NR2F1)
			Q7Z435(CC2D1A)		Q9NRM7(LATS2)	Q92918(MAP4K1)		Q99814(EPAS1)					Q02388(COL7A1)			P09493(TPM1)					P11362(FGFR1)
			Q7Z5R6(APBB1IP)		Q9NVJ2(ARL8B)	Q93063(EXT2)		Q99967(CITED2)					Q05682(CALD1)			P09619(PDGFRB)					P11388(TOP2A)
			Q86SJ2(AMIGO2)		Q9P2E9(RRBP1)	Q969S8(HDAC10)		Q9BQE4(SELS)					Q08117(AES)			P10275(AR)					P11473(VDR)
			Q8N752(CSNK1A1L)		Q9UKG1(APPL1)	Q96JM2(ZNF462)		Q9BXK1(KLF16)					Q12830(BPTF)			P10589(NR2F1)					P11717(IGF2R)
			Q92633(LPAR1)		Q9UQF2(MAPK8IP1)	Q96QB1(DLC1)		Q9H2X6(HIPK2)					Q14112(NID2)			P11362(FGFR1)					P12107(COL11A1)
			Q92734(TFG)		Q9Y243(AKT3)	Q96SZ4(ZSCAN10)		Q9H7R0(ZNF442)					Q14211(NFIL3)			P11388(TOP2A)					P12111(COL6A3)
			Q92918(MAP4K1)		Q9Y4K4(MAP4K5)	Q99684(GFI1)		Q9NQ30(ESM1)					Q14315(FLNC)			P11473(VDR)					P12694(BCKDHA)
			Q92963(RIT1)			Q99814(EPAS1)		Q9NRM7(LATS2)					Q14686(NCOA6)			P11717(IGF2R)					P13500(CCL2)
			Q93045(STMN2)			Q99967(CITED2)		Q9UIS9(MBD1)					Q15436(SEC23A)			P12107(COL11A1)					P13726(F3)
			Q93063(EXT2)			Q9BQE4(SELS)		Q9UQF2(MAPK8IP1)					Q15582(TGFBI)			P12111(COL6A3)					P13796(LCP1)
			Q96LQ7(CDH24)			Q9BXK1(KLF16)		Q9UQL6(HDAC5)					Q15628(TRADD)			P12694(BCKDHA)					P13797(PLS3)
			Q96Q27(ASB2)			Q9H2X6(HIPK2)		Q9Y4X4(KLF12)					Q15699(ALX1)			P13500(CCL2)					P13987(CD59)
			Q96QB1(DLC1)			Q9H7R0(ZNF442)		Q9Y5J3(HEY1)					Q16270(IGFBP7)			P13640(MT1G)					P15144(ANPEP)
			Q99814(EPAS1)			Q9NQ30(ESM1)		Q9Y5W3(KLF2)					Q16514(TAF12)			P13726(F3)					P15924(DSP)
			Q9BQE4(SELS)			Q9NRM7(LATS2)							Q86SJ2(AMIGO2)			P13796(LCP1)					P16104(H2AFX)
			Q9H1J7(WNT5B)			Q9UIS9(MBD1)							Q8IZT6(ASPM)			P13797(PLS3)					P16234(PDGFRA)
			Q9H2L5(RASSF4)			Q9UQF2(MAPK8IP1)							Q8NDN9(RCBTB1)			P13987(CD59)					P17301(ITGA2)
			Q9H2X6(HIPK2)			Q9UQL6(HDAC5)							Q8NFP9(NBEA)			P15144(ANPEP)					P17600(SYN1)
			Q9H4D0(CLSTN2)			Q9Y4K4(MAP4K5)							Q8NHU6(TDRD7)			P15153(RAC2)					P17655(CAPN2)
			Q9HC97(GPR35)			Q9Y4X4(KLF12)							Q8TAQ2(SMARCC2)			P15924(DSP)					P17693(HLA-G)
			Q9HD67(MYO10)			Q9Y5J3(HEY1)							Q8TCT9(HM13)			P16104(H2AFX)					P17861(XBP1)
			Q9NRM7(LATS2)			Q9Y5W3(KLF2)							Q8TEL6(TRPC4AP)			P16234(PDGFRA)					P17927(CR1)
			Q9NVJ2(ARL8B)										Q8WWI1(LMO7)			P17301(ITGA2)					P17936(IGFBP3)
			Q9NZH8(IL1F9)										Q92626(PXDN)			P17600(SYN1)					P18146(EGR1)
			Q9P121(NTM)										Q92918(MAP4K1)			P17655(CAPN2)					P19021(PAM)
			Q9P246(STIM2)										Q92963(RIT1)			P17693(HLA-G)					P19022(CDH2)
			Q9P2E9(RRBP1)										Q969S8(HDAC10)			P17861(XBP1)					P19883(FST)
			Q9UKG1(APPL1)										Q96KP1(EXOC2)			P17927(CR1)					P20339(RAB5A)
			Q9UQF2(MAPK8IP1)										Q96QB1(DLC1)			P17936(IGFBP3)					P20809(IL11)
			Q9Y243(AKT3)										Q99814(EPAS1)			P18146(EGR1)					P21291(CSRP1)
			Q9Y4K4(MAP4K5)										Q99967(CITED2)			P19021(PAM)					P21333(FLNA)
			Q9Y5F3(PCDHB1)										Q9BQE4(SELS)			P19022(CDH2)					P21453(S1PR1)
													Q9BSI4(TINF2)			P19883(FST)					P22413(ENPP1)
													Q9H2L5(RASSF4)			P20337(RAB3B)					P22466(GAL)
													Q9H2X6(HIPK2)			P20339(RAB5A)					P22692(IGFBP4)
													Q9H4D0(CLSTN2)			P20809(IL11)					P23142(FBLN1)
													Q9H4G0(EPB41L1)			P21291(CSRP1)					P23219(PTGS1)
													Q9HD67(MYO10)			P21333(FLNA)					P23229(ITGA6)
													Q9NP85(NPHS2)			P21453(S1PR1)					P24821(TNC)
													Q9NQ30(ESM1)			P22413(ENPP1)					P24844(MYL9)
													Q9NZ32(ACTR10)			P22466(GAL)					P26038(MSN)
													Q9NZH8(IL1F9)			P22692(IGFBP4)					P26583(HMGB2)
													Q9P121(NTM)			P23142(FBLN1)					P27487(DPP4)
													Q9P246(STIM2)			P23219(PTGS1)					P27816(MAP4)
													Q9UDY2(TJP2)			P23229(ITGA6)					P28300(LOX)
													Q9UHG2(PCSK1N)			P23560(BDNF)					P28715(ERCC5)
													Q9UIS9(MBD1)			P24821(TNC)					P28845(HSD11B1)
													Q9UJ70(NAGK)			P24844(MYL9)					P30559(OXTR)
													Q9UK05(GDF2)			P26038(MSN)					P33981(TTK)
													Q9UKG1(APPL1)			P26583(HMGB2)					P35241(RDX)
													Q9UQF2(MAPK8IP1)			P27487(DPP4)					P35249(EIF4A2)
													Q9UQL6(HDAC5)			P27816(MAP4)					P35318(ADM)
													Q9Y243(AKT3)			P28300(LOX)					P35713(SOX18)
													Q9Y4K4(MAP4K5)			P28562(DUSP1)					P36021(SLC16A2)
													Q9Y4X4(KLF12)			P28715(ERCC5)					P40123(CAP2)
													Q9Y5F3(PCDHB1)			P28845(HSD11B1)					P40189(IL6ST)
																P30559(OXTR)					P41134(ID1)
																P32322(PYCR1)					P45877(PPIC)
																P32455(GBP1)					P46013(MKI67)
																P33981(TTK)					P46940(IQGAP1)
																P35241(RDX)					P47928(ID4)
																P35249(EIF4A2)					P48061(CXCL12)
																P35318(ADM)					P48307(TFPI2)
																P35713(SOX18)					P48634(BAT2)
																P35754(GLRX)					P49459(UBE2A)
																P36021(SLC16A2)					P49588(AARS)
																P36405(ARL3)					P49767(VEGFC)
																P40189(IL6ST)					P51636(CAV2)
																P40261(NNMT)					P51808(DYNLT3)
																P41134(ID1)					P52789(TNFAIP1)
																P42574(CASP3)					P52926(HMGA2)
																P45877(PPIC)					P53621(COPA)
																P46013(MKI67)					P53805(RCAN1)
																P46940(IQGAP1)					P55259(GP2)
																P47928(ID4)					P55287(CDH11)
																P48061(CXCL12)					P56817(BACE1)
																P48307(TFPI2)					P78552(IL13RA1)
																P48634(BAT2)					P80723(BASP1)
																P49459(UBE2A)					P83111(LACTB)
																P49588(AARS)					Q00610(CLTC)
																P49767(VEGFC)					Q01860(ASH1L)
																P51636(CAV2)					Q01954(BNC1)
																P51808(DYNLT3)					Q02241(KIF23)
																P51911(CNN1)					Q02318(CYP27A1)
																P52789(TNFAIP1)					Q02363(ID2)
																P52926(HMGA2)					Q02388(COL7A1)
																P53611(RABGGTB)					Q03169(TNFAIP2)
																P53621(COPA)					Q04727(TLE4)
																P53805(RCAN1)					Q04900(CD164)
																P55287(CDH11)					Q05682(CALD1)
																P55735(SEC13)					Q07065(CKAP4)
																P56817(BACE1)					Q07343(PDE4B)
																P78552(IL13RA1)					Q08117(AES)
																P80294(MT1H)					Q08397(LOXL1)
																P80297(MT1X)					Q12830(BPTF)
																P83111(LACTB)					Q12841(FSTL1)
																Q00610(CLTC)					Q13103(SPP2)
																Q01860(ASH1L)					Q13137(CALCOCO2)
																Q01954(BNC1)					Q13435(SF3B2)
																Q02241(KIF23)					Q13439(GOLGA4)
																Q02318(CYP27A1)					Q13509(TUBB3)
																Q02363(ID2)					Q13825(AUH)
																Q02388(COL7A1)					Q14112(NID2)
																Q04727(TLE4)					Q14211(NFIL3)
																Q05682(CALD1)					Q14315(FLNC)
																Q07343(PDE4B)					Q14332(FZD2)
																Q08117(AES)					Q14410(GK2)
																Q08397(LOXL1)					Q14563(SEMA3A)
																Q12830(BPTF)					Q14686(NCOA6)
																Q12841(FSTL1)					Q15011(HERPUD1)
																Q13103(SPP2)					Q15134(PIK3C3)
																Q13164(MAPK7)					Q15170(TCEAL1)
																Q13435(SF3B2)					Q15208(STK38)
																Q13509(TUBB3)					Q15428(SF3A2)
																Q13825(AUH)					Q15436(SEC23A)
																Q14112(NID2)					Q15582(TGFBI)
																Q14211(NFIL3)					Q15699(ALX1)
																Q14315(FLNC)					Q15772(SPEG)
																Q14332(FZD2)					Q15878(CACNA1E)
																Q14410(GK2)					Q16236(NFE2L2)
																Q14686(NCOA6)					Q16270(IGFBP7)
																Q15011(HERPUD1)					Q16394(EXT1)
																Q15134(PIK3C3)					Q16514(TAF12)
																Q15147(PLCB4)					Q16585(SGCB)
																Q15170(TCEAL1)					Q16617(NKG7)
																Q15208(STK38)					Q16690(DUSP5)
																Q15428(SF3A2)					Q16739(UGCG)
																Q15436(SEC23A)					Q86SJ2(AMIGO2)
																Q15582(TGFBI)					Q86TH1(ADAMTSL2)
																Q15628(TRADD)					Q86UD4(ZNF329)
																Q15699(ALX1)					Q86UP3(ZFHX4)
																Q15878(CACNA1E)					Q8IUR6(C5orf41)
																Q16236(NFE2L2)					Q8IVL5(LEPREL1)
																Q16270(IGFBP7)					Q8IWU6(SULF1)
																Q16394(EXT1)					Q8IZN3(ZDHHC14)
																Q16514(TAF12)					Q8IZT6(ASPM)
																Q16690(DUSP5)					Q8N130(SLC34A3)
																Q16739(UGCG)					Q8N1M1(BEST3)
																Q16775(FAHD1)					Q8N2P3(MFSD8)
																Q7Z435(CC2D1A)					Q8NF99(ZNF397OS)
																Q86SJ2(AMIGO2)					Q8NFF2(SLC24A4)
																Q86TH1(ADAMTSL2)					Q8NFP9(NBEA)
																Q86UD4(ZNF329)					Q8TAQ2(SMARCC2)
																Q86UP3(ZFHX4)					Q8TCT9(HM13)
																Q8IUR6(C5orf41)					Q8TDE7(TOM1L2)
																Q8IVL5(LEPREL1)					Q8TEL6(TRPC4AP)
																Q8IWU6(SULF1)					Q8WUG5(SLC22A17)
																Q8IYN2(TCEAL8)					Q8WWI1(LMO7)
																Q8IZN3(ZDHHC14)					Q92633(LPAR1)
																Q8IZT6(ASPM)					Q92734(TFG)
																Q8N130(SLC34A3)					Q92917(GPKOW)
																Q8N1M1(BEST3)					Q92963(RIT1)
																Q8N2P3(MFSD8)					Q93045(STMN2)
																Q8N752(CSNK1A1L)					Q93063(EXT2)
																Q8NDN9(RCBTB1)					Q969S8(HDAC10)
																Q8NF99(ZNF397OS)					Q96CV9(OPTN)
																Q8NFE7(LIMS2)					Q96FT7(ACCN4)
																Q8NFF2(SLC24A4)					Q96JM2(ZNF462)
																Q8NFP9(NBEA)					Q96KF2(PRAC)
																Q8NHU6(TDRD7)					Q96KK5(HIST1H2AH)
																Q8TAQ2(SMARCC2)					Q96LQ7(CDH24)
																Q8TCT9(HM13)					Q96NE9(FRMD6)
																Q8TDE7(TOM1L2)					Q96QB1(DLC1)
																Q8TDX7(NEK7)					Q96S97(MYADM)
																Q8TE76(MORC4)					Q96SZ4(ZSCAN10)
																Q8TEL6(TRPC4AP)					Q99570(PIK3R4)
																Q8WUG5(SLC22A17)					Q99684(GFI1)
																Q8WWI1(LMO7)					Q99814(EPAS1)
																Q92626(PXDN)					Q99967(CITED2)
																Q92633(LPAR1)					Q9BQE4(SELS)
																Q92734(TFG)					Q9BRS8(LARP6)
																Q92917(GPKOW)					Q9BSI4(TINF2)
																Q92918(MAP4K1)					Q9BXK1(KLF16)
																Q92963(RIT1)					Q9BYS1(KRTAP1-5)
																Q93063(EXT2)					Q9BZF9(UACA)
																Q969G5(PRKCDBP)					Q9BZL3(MST150)
																Q969S8(HDAC10)					Q9BZM4(ULBP3)
																Q96FT7(ACCN4)					Q9C075(KRT23)
																Q96G45(WSCD1)					Q9C0J8(SFT2D3)
																Q96JM2(ZNF462)					Q9H013(ADAM19)
																Q96KK5(HIST1H2AH)					Q9H1J7(WNT5B)
																Q96KP1(EXOC2)					Q9H299(SH3BGRL3)
																Q96LQ7(CDH24)					Q9H2X6(HIPK2)
																Q96NE9(FRMD6)					Q9H2X8(IFI27L2)
																Q96QB1(DLC1)					Q9H4D0(CLSTN2)
																Q96SZ4(ZSCAN10)					Q9H4G0(EPB41L1)
																Q99570(PIK3R4)					Q9H7R0(ZNF442)
																Q99684(GFI1)					Q9HA72(CALHM2)
																Q99814(EPAS1)					Q9HC07(TMEM165)
																Q99967(CITED2)					Q9HC97(GPR35)
																Q9BQE4(SELS)					Q9HCU0(CD248)
																Q9BRS8(LARP6)					Q9HD67(MYO10)
																Q9BSI4(TINF2)					Q9NP85(NPHS2)
																Q9BSU1(B3GNT9)					Q9NPE2(NGRN)
																Q9BXK1(KLF16)					Q9NQ30(ESM1)
																Q9BYS1(KRTAP1-5)					Q9NQ40(C20orf54)
																Q9BYX2(TBC1D2)					Q9NRD0(FBXO8)
																Q9BZF9(UACA)					Q9NRM7(LATS2)
																Q9BZM4(ULBP3)					Q9NY64(SLC2A8)
																Q9C075(KRT23)					Q9NZ32(ACTR10)
																Q9C0J8(SFT2D3)					Q9NZH8(IL1F9)
																Q9H013(ADAM19)					Q9NZU5(LMCD1)
																Q9H1J7(WNT5B)					Q9P121(NTM)
																Q9H2L5(RASSF4)					Q9P246(STIM2)
																Q9H2X6(HIPK2)					Q9P2E9(RRBP1)
																Q9H4D0(CLSTN2)					Q9P2R7(SUCLA2)
																Q9H4G0(EPB41L1)					Q9UBR2(CTSZ)
																Q9H7R0(ZNF442)					Q9UBX1(CTSF)
																Q9HC07(TMEM165)					Q9UDY2(TJP2)
																Q9HC97(GPR35)					Q9UHB6(LIMA1)
																Q9HCU0(CD248)					Q9UHG2(PCSK1N)
																Q9HD67(MYO10)					Q9UI14(RABAC1)
																Q9NP85(NPHS2)					Q9UIS9(MBD1)
																Q9NPE2(NGRN)					Q9UK05(GDF2)
																Q9NQ30(ESM1)					Q9UKG1(APPL1)
																Q9NRD0(FBXO8)					Q9UQF2(MAPK8IP1)
																Q9NRM7(LATS2)					Q9UQL6(HDAC5)
																Q9NVJ2(ARL8B)					Q9Y2K5(R3HDM2)
																Q9NXH8(C9orf167)					Q9Y3D2(MSRB2)
																Q9NY64(SLC2A8)					Q9Y4K4(MAP4K5)
																Q9NZ32(ACTR10)					Q9Y4X4(KLF12)
																Q9NZH8(IL1F9)					Q9Y5F3(PCDHB1)
																Q9NZU5(LMCD1)					Q9Y5J3(HEY1)
																Q9P121(NTM)					Q9Y5S1(TRPV2)
																Q9P246(STIM2)					Q9Y5W3(KLF2)
																Q9P2E9(RRBP1)					Q9Y6N5(SQRDL)
																Q9P2I4(AADACL1)					Q9Y6X0(SETBP1)
																Q9P2R7(SUCLA2)					Q9Y6X7(MPRIP)
																Q9UBR2(CTSZ)
																Q9UBX1(CTSF)
																Q9UDY2(TJP2)
																Q9UHB6(LIMA1)
																Q9UHG2(PCSK1N)
																Q9UIS9(MBD1)
																Q9UJ70(NAGK)
																Q9UK05(GDF2)
																Q9UKG1(APPL1)
																Q9UQF2(MAPK8IP1)
																Q9UQL6(HDAC5)
																Q9Y243(AKT3)
																Q9Y2K5(R3HDM2)
																Q9Y3D2(MSRB2)
																Q9Y4K4(MAP4K5)
																Q9Y4X4(KLF12)
																Q9Y5F3(PCDHB1)
																Q9Y5J3(HEY1)
																Q9Y5S1(TRPV2)
																Q9Y5W3(KLF2)
																Q9Y6N5(SQRDL)
																Q9Y6X0(SETBP1)
																Q9Y6X7(MPRIP)

## Sheet: Induced by MYCN-ER
	Biological process terms																																	Function terms									Component terms
GO term ID	GO:0006396	GO:0007028	GO:0008152	GO:0016070	GO:0043170	GO:0044237	GO:0044238	GO:0007046	GO:0042254	GO:0050875	GO:0007582	GO:0006364	GO:0016072	GO:0009059	GO:0009058	GO:0044249	GO:0006139	GO:0006412	GO:0043037	GO:0006397	GO:0008150	GO:0043283	GO:0009987	GO:0016071	GO:0000375	GO:0000377	GO:0000398	GO:0031123	GO:0031124	GO:0006457			GO term ID	GO:0003735	GO:0003723	GO:0003674	GO:0003676	GO:0051082	GO:0000166			GO term ID	GO:0005622	GO:0005739	GO:0030529	GO:0043227	GO:0043231	GO:0043226	GO:0043229
GO term description	RNA processing	cytoplasm organization and biogenesis	metabolism	RNA metabolism	macromolecule metabolism	cellular metabolism	primary metabolism	ribosome biogenesis	ribosome biogenesis and assembly	cellular physiological process	physiological process	rRNA processing	rRNA metabolism	macromolecule biosynthesis	biosynthesis	cellular biosynthesis	nucleobase, nucleoside, nucleotide and nucleic acid metabolism	protein biosynthesis	translation	mRNA processing	biological_process	biopolymer metabolism	cellular process	mRNA metabolism	RNA splicing, via transesterification reactions	RNA splicing, via transesterification reactions with bulged adenosine as nucleophile	nuclear mRNA splicing, via spliceosome	RNA 3'-end processing	mRNA 3'-end processing	protein folding			GO term description	structural constituent of ribosome	RNA binding	molecular_function	nucleic acid binding	unfolded protein binding	nucleotide binding			GO term description	intracellular	mitochondrion	ribonucleoprotein complex	membrane-bound organelle	intracellular membrane-bound organelle	organelle	intracellular organelle
P-value (Bonferroni-corrected)	0	0	0	0	0	0	0	8.037e-10	3.691e-09	1.409e-07	2.279e-07	5.085e-07	5.085e-07	7.26e-07	1.37e-06	1.674e-06	3.964e-06	7.493e-06	2.13e-05	4.813e-05	6.499e-05	0.0002229	0.0004845	0.000532	0.001521	0.001521	0.001521	0.005297	0.005297	0.008455			P-value (Bonferroni-corrected)	0	1.477e-07	3.899e-05	0.0002901	0.001916	0.00619			P-value (Bonferroni-corrected)	0	0	0	0	0	7.244e-11	7.244e-11
Member genes	O00567(NOP56)	O00567(NOP56)	O00145(INPP5D)	O00567(NOP56)	O00567(NOP56)	O00145(INPP5D)	O00567(NOP56)	O00567(NOP56)	O00567(NOP56)	O00145(INPP5D)	O00145(INPP5D)	O00567(NOP56)	O00567(NOP56)	O14602(EIF1AY)	O14602(EIF1AY)	O14602(EIF1AY)	O00567(NOP56)	O14602(EIF1AY)	O14602(EIF1AY)	P08579(SNRPB2)	O00145(INPP5D)	O00567(NOP56)	O00145(INPP5D)	P08579(SNRPB2)	P08579(SNRPB2)	P08579(SNRPB2)	P08579(SNRPB2)	P11940(PABPC1)	P11940(PABPC1)	O43765(SGTA)			Member genes	O75394(MRPL33)	O00567(NOP56)	O00145(INPP5D)	O00567(NOP56)	O43765(SGTA)	O00764(PDXK)			Member genes	O00567(NOP56)	O43402(COX4NB)	O75394(MRPL33)	O00567(NOP56)	O00567(NOP56)	O00567(NOP56)	O00567(NOP56)
	O75648(TRMU)	P22087(FBL)	O00567(NOP56)	O75648(TRMU)	O14602(EIF1AY)	O00567(NOP56)	O14503(BHLHE40)	P22087(FBL)	P22087(FBL)	O00567(NOP56)	O00567(NOP56)	P22087(FBL)	P22087(FBL)	O43422(PRKRIR)	O43422(PRKRIR)	O43422(PRKRIR)	O14503(BHLHE40)	O43422(PRKRIR)	O43422(PRKRIR)	P11940(PABPC1)	O00339(MATN2)	O15117(FYB)	O00567(NOP56)	P11940(PABPC1)	P55769(NHP2L1)	P55769(NHP2L1)	P55769(NHP2L1)	Q12849(GRSF1)	Q12849(GRSF1)	O75347(TBCA)				P05386(RPLP1)	O14602(EIF1AY)	O00339(MATN2)	O14503(BHLHE40)	O75347(TBCA)	O15315(RAD51L1)				O14503(BHLHE40)	O75648(TRMU)	O76094(SRP72)	O14503(BHLHE40)	O14503(BHLHE40)	O14503(BHLHE40)	O14503(BHLHE40)
	P08579(SNRPB2)	P55769(NHP2L1)	O14503(BHLHE40)	P08579(SNRPB2)	O15117(FYB)	O14503(BHLHE40)	O14602(EIF1AY)	P56182(RRP1)	P55769(NHP2L1)	O14503(BHLHE40)	O14503(BHLHE40)	P56182(RRP1)	P56182(RRP1)	O43505(B3GNT1)	O43505(B3GNT1)	O43505(B3GNT1)	O15315(RAD51L1)	O75394(MRPL33)	P05198(EIF2S1)	P55769(NHP2L1)	O00567(NOP56)	O15315(RAD51L1)	O14503(BHLHE40)	P55769(NHP2L1)	Q01081(U2AF1)	Q01081(U2AF1)	Q01081(U2AF1)	Q12996(CSTF3)	Q12996(CSTF3)	O95433(AHSA1)				P22090(RPS4Y1)	O15523(DDX3Y)	O00567(NOP56)	O14602(EIF1AY)	O95433(AHSA1)	O15440(ABCC5)				O14744(PRMT5)	P00167(CYB5A)	P05198(EIF2S1)	O15117(FYB)	O15117(FYB)	O15117(FYB)	O15117(FYB)
	P11940(PABPC1)	P56182(RRP1)	O14602(EIF1AY)	P11940(PABPC1)	O15145(ANAPC7)	O14602(EIF1AY)	O15117(FYB)	Q13823(GNL2)	P56182(RRP1)	O14602(EIF1AY)	O14602(EIF1AY)	Q14137(BOP1)	Q14137(BOP1)	O60327(GLT25D2)	O60327(GLT25D2)	O60327(GLT25D2)	O15318(POLR3G)	P05198(EIF2S1)	P05386(RPLP1)	Q01081(U2AF1)	O14503(BHLHE40)	O43505(B3GNT1)	O14602(EIF1AY)	Q01081(U2AF1)	Q15393(SF3B3)	Q15393(SF3B3)	Q15393(SF3B3)	Q14493(SLBP)	Q14493(SLBP)	P10809(TLN1)				P23396(RPS3)	O43592(XPOT)	O00764(PDXK)	O15315(RAD51L1)	P10809(TLN1)	O15523(DDX3Y)				O15117(FYB)	P04179(SOD2)	P05386(RPLP1)	O15315(RAD51L1)	O15315(RAD51L1)	O15145(ANAPC7)	O15145(ANAPC7)
	P22087(FBL)	Q13823(GNL2)	O15117(FYB)	P22087(FBL)	O15315(RAD51L1)	O15117(FYB)	O15145(ANAPC7)	Q14137(BOP1)	Q13823(GNL2)	O14744(PRMT5)	O14744(PRMT5)	Q14978(NOLC1)	Q14978(NOLC1)	O75394(MRPL33)	O75394(MRPL33)	O75394(MRPL33)	O43719(HTATSF1)	P05386(RPLP1)	P11940(PABPC1)	Q12849(GRSF1)	O14602(EIF1AY)	O60318(MCM3AP)	O14744(PRMT5)	Q12849(GRSF1)	Q16629(SFRS7)	Q16629(SFRS7)	Q16629(SFRS7)	Q9UKF6(CPSF3)	Q9UKF6(CPSF3)	P30405(PPIF)				P46777(RPL5)	O43719(HTATSF1)	O14503(BHLHE40)	O15523(DDX3Y)	P38646(HSPA9)	O43719(HTATSF1)				O15145(ANAPC7)	P08574(CYC1)	P08579(SNRPB2)	O15318(POLR3G)	O15318(POLR3G)	O15315(RAD51L1)	O15315(RAD51L1)
	P52597(HNRNPF)	Q14137(BOP1)	O15145(ANAPC7)	P41250(GARS)	O43422(PRKRIR)	O15145(ANAPC7)	O15315(RAD51L1)	Q14978(NOLC1)	Q14137(BOP1)	O15117(FYB)	O14862(AIM2)	Q8WVM0(TFB1M)	Q8WVM0(TFB1M)	P05198(EIF2S1)	O95671(ASMTL)	O95671(ASMTL)	O60318(MCM3AP)	P11940(PABPC1)	P29692(EEF1D)	Q12996(CSTF3)	O14744(PRMT5)	O60327(GLT25D2)	O15117(FYB)	Q12996(CSTF3)	Q86V81(THOC4)	Q86V81(THOC4)	Q86V81(THOC4)			P38646(HSPA9)				P47914(RPL29)	P05198(EIF2S1)	O14602(EIF1AY)	O43422(PRKRIR)	P48643(CCT5)	O60318(MCM3AP)				O15315(RAD51L1)	P10109(FDX1)	P22087(FBL)	O15523(DDX3Y)	O15523(DDX3Y)	O15318(POLR3G)	O15318(POLR3G)
	P55769(NHP2L1)	Q14978(NOLC1)	O15315(RAD51L1)	P41252(IARS)	O43505(B3GNT1)	O15315(RAD51L1)	O15318(POLR3G)	Q8WVM0(TFB1M)	Q14978(NOLC1)	O15145(ANAPC7)	O15117(FYB)	Q96G21(IMP4)	Q96G21(IMP4)	P05386(RPLP1)	P05198(EIF2S1)	P05198(EIF2S1)	O60673(REV3L)	P22090(RPS4Y1)	P41250(GARS)	Q14493(SLBP)	O14862(AIM2)	O60673(REV3L)	O15145(ANAPC7)	Q14493(SLBP)	Q92499(DDX1)	Q92499(DDX1)	Q92499(DDX1)			P48643(CCT5)				P55769(NHP2L1)	P05386(RPLP1)	O14744(PRMT5)	O43592(XPOT)	P50990(CCT8)	O60673(REV3L)				O15318(POLR3G)	P10809(TLN1)	P22090(RPS4Y1)	O15550(KDM6A)	O15550(KDM6A)	O15523(DDX3Y)	O15523(DDX3Y)
	P56182(RRP1)	Q8WVM0(TFB1M)	O15318(POLR3G)	P52597(HNRNPF)	O43765(SGTA)	O15318(POLR3G)	O43422(PRKRIR)	Q92499(DDX1)	Q8WVM0(TFB1M)	O15315(RAD51L1)	O15145(ANAPC7)	Q9NY12(GAR1)	Q9NY12(GAR1)	P11940(PABPC1)	P05386(RPLP1)	P05386(RPLP1)	O75648(TRMU)	P23396(RPS3)	P41252(IARS)	Q15393(SF3B3)	O15117(FYB)	O75648(TRMU)	O15315(RAD51L1)	Q15393(SF3B3)	Q96SB4(SRPK1)	Q96SB4(SRPK1)	Q96SB4(SRPK1)			P50990(CCT8)				P82932(MRPS6)	P08579(SNRPB2)	O15117(FYB)	O43719(HTATSF1)	Q12931(TRAP1)	O95747(OXSR1)				O15523(DDX3Y)	P13073(COX4I1)	P23396(RPS3)	O43402(COX4NB)	O43402(COX4NB)	O15550(KDM6A)	O15550(KDM6A)
	Q01081(U2AF1)	Q92499(DDX1)	O43396(TXNL1)	P55769(NHP2L1)	O60318(MCM3AP)	O43396(TXNL1)	O43505(B3GNT1)	Q96G21(IMP4)	Q92499(DDX1)	O15318(POLR3G)	O15315(RAD51L1)	Q9UNQ2(DIMT1L)	Q9UNQ2(DIMT1L)	P22090(RPS4Y1)	P09417(QDPR)	P09417(QDPR)	O76071(CIAO1)	P29692(EEF1D)	P46199(MTIF2)	Q16629(SFRS7)	O15145(ANAPC7)	O95747(OXSR1)	O15318(POLR3G)	Q16629(SFRS7)	Q9BWJ5(SF3B5)	Q9BWJ5(SF3B5)	Q9BWJ5(SF3B5)			Q12931(TRAP1)				Q8N5N7(MRPL50)	P11940(PABPC1)	O15145(ANAPC7)	O60318(MCM3AP)	Q86V81(THOC4)	O96017(CHEK2)				O15550(KDM6A)	P13995(MTHFD2)	P37108(SRP14)	O43505(B3GNT1)	O43505(B3GNT1)	O43402(COX4NB)	O43402(COX4NB)
	Q12849(GRSF1)	Q96G21(IMP4)	O43422(PRKRIR)	P56182(RRP1)	O60327(GLT25D2)	O43422(PRKRIR)	O43719(HTATSF1)	Q99848(EBNA1BP2)	Q96G21(IMP4)	O15440(ABCC5)	O15318(POLR3G)	Q9Y2X3(NOP58)	Q9Y2X3(NOP58)	P23396(RPS3)	P11172(UMPS)	P11172(UMPS)	O95983(MBD3)	P41250(GARS)	P49458(SRP9)	Q86V81(THOC4)	O15315(RAD51L1)	O96017(CHEK2)	O15440(ABCC5)	Q86V81(THOC4)	Q9H840(GEMIN7)	Q9H840(GEMIN7)	Q9H840(GEMIN7)			Q86V81(THOC4)				Q92552(MRPS27)	P19338(NCL)	O15315(RAD51L1)	O60673(REV3L)	Q8NI60(CABC1)	P08579(SNRPB2)				O43396(TXNL1)	P21796(VDAC1)	P46777(RPL5)	O43592(XPOT)	O43592(XPOT)	O43505(B3GNT1)	O43505(B3GNT1)
	Q12996(CSTF3)	Q99848(EBNA1BP2)	O43505(B3GNT1)	Q01081(U2AF1)	O60673(REV3L)	O43505(B3GNT1)	O43765(SGTA)	Q9BVJ6(UTP14A)	Q99848(EBNA1BP2)	O43396(TXNL1)	O15440(ABCC5)	Q9Y3A2(UTP11L)	Q9Y3A2(UTP11L)	P29692(EEF1D)	P11926(ODC1)	P11926(ODC1)	P00491(NP)	P41252(IARS)	Q14197(ICT1)	Q92499(DDX1)	O15318(POLR3G)	P00491(NP)	O15492(RGS16)	Q92499(DDX1)	Q9Y333(LSM2)	Q9Y333(LSM2)	Q9Y333(LSM2)			Q8NI60(CABC1)				Q92665(MRPS31)	P22087(FBL)	O15318(POLR3G)	O60678(PRMT3)	Q8TAA5(GRPEL2)	P10809(TLN1)				O43402(COX4NB)	P22307(SCP2)	P47914(RPL29)	O43719(HTATSF1)	O43719(HTATSF1)	O43592(XPOT)	O43592(XPOT)
	Q14103(HNRNPD)	Q9BVJ6(UTP14A)	O43570(CA12)	Q12849(GRSF1)	O75347(TBCA)	O43570(CA12)	O60318(MCM3AP)	Q9NY12(GAR1)	Q9BVJ6(UTP14A)	O43422(PRKRIR)	O15492(RGS16)			P41250(GARS)	P11940(PABPC1)	P11940(PABPC1)	P04179(SOD2)	P46199(MTIF2)	Q15046(KARS)	Q92989(CLP1)	O15440(ABCC5)	P08579(SNRPB2)	O43396(TXNL1)	Q92989(CLP1)	Q9Y4Y9(LSM5)	Q9Y4Y9(LSM5)	Q9Y4Y9(LSM5)			Q8TAA5(GRPEL2)				Q9BQ48(MRPL34)	P22090(RPS4Y1)	O15440(ABCC5)	O95863(SNAI1)	Q96DA6(DNAJC19)	P11940(PABPC1)				O43505(B3GNT1)	P22570(FDXR)	P49458(SRP9)	O43752(STX6)	O43752(STX6)	O43719(HTATSF1)	O43719(HTATSF1)
	Q14137(BOP1)	Q9NY12(GAR1)	O43719(HTATSF1)	Q12996(CSTF3)	O75394(MRPL33)	O43719(HTATSF1)	O60327(GLT25D2)	Q9UKD2(MRTO4)	Q9NY12(GAR1)	O43505(B3GNT1)	O43396(TXNL1)			P41252(IARS)	P13995(MTHFD2)	P13995(MTHFD2)	P06454(PTMA)	P46777(RPL5)	Q15056(EIF4H)	Q96SB4(SRPK1)	O15492(RGS16)	P09874(PARP1)	O43422(PRKRIR)	Q96SB4(SRPK1)						Q96BP3(PPWD1)				Q9BRJ2(MRPL45)	P23396(RPS3)	O15492(RGS16)	O95983(MBD3)	Q99933(BAG1)	P13533(MYH6)				O43592(XPOT)	P23434(GCSH)	P52597(HNRNPF)	O60318(MCM3AP)	O60318(MCM3AP)	O43752(STX6)	O43752(STX6)
	Q14493(SLBP)	Q9UKD2(MRTO4)	O43765(SGTA)	Q14103(HNRNPD)	O75648(TRMU)	O43765(SGTA)	O60673(REV3L)	Q9UNQ2(DIMT1L)	Q9UKD2(MRTO4)	O43570(CA12)	O43422(PRKRIR)			P46199(MTIF2)	P22090(RPS4Y1)	P22090(RPS4Y1)	P08579(SNRPB2)	P47914(RPL29)	Q92499(DDX1)	Q9BWJ5(SF3B5)	O43396(TXNL1)	P11940(PABPC1)	O43505(B3GNT1)	Q9BWJ5(SF3B5)						Q96DA6(DNAJC19)				Q9BYC8(MRPL32)	P37108(SRP14)	O15523(DDX3Y)	P05198(EIF2S1)	Q9UHV9(PFDN2)	P19338(NCL)				O43719(HTATSF1)	P24539(ATP5F1)	P55769(NHP2L1)	O60673(REV3L)	O60673(REV3L)	O60318(MCM3AP)	O60318(MCM3AP)
	Q14978(NOLC1)	Q9UNQ2(DIMT1L)	O60318(MCM3AP)	Q14137(BOP1)	O95433(AHSA1)	O60318(MCM3AP)	O75347(TBCA)	Q9Y2X3(NOP58)	Q9UNQ2(DIMT1L)	O43592(XPOT)	O43505(B3GNT1)			P46777(RPL5)	P22102(GART)	P22102(GART)	P09874(PARP1)	P49458(SRP9)	Q9BPZ3()	Q9H840(GEMIN7)	O43422(PRKRIR)	P17317(H2AFZ)	O43570(CA12)	Q9H840(GEMIN7)						Q99933(BAG1)				Q9BYD2(MRPL9)	P46777(RPL5)	O15550(KDM6A)	P05386(RPLP1)	Q9Y276(BCS1L)	P22392(NME1)				O43752(STX6)	P30048(PRDX3)	P56182(RRP1)	O60678(PRMT3)	O60678(PRMT3)	O60673(REV3L)	O60673(REV3L)
	Q15393(SF3B3)	Q9Y2X3(NOP58)	O60327(GLT25D2)	Q14493(SLBP)	O95747(OXSR1)	O60327(GLT25D2)	O75394(MRPL33)	Q9Y3A2(UTP11L)	Q9Y2X3(NOP58)	O43719(HTATSF1)	O43570(CA12)			P46976(GYG1)	P22234(PAICS)	P22234(PAICS)	P10827(THRA)	P82932(MRPS6)	Q9P2J5(LARS)	Q9UKF6(CPSF3)	O43505(B3GNT1)	P18754(RCC1)	O43592(XPOT)	Q9UKF6(CPSF3)						Q9P0X2(HSPA14)				Q9BYN8(MRPS26)	P47914(RPL29)	O43396(TXNL1)	P08579(SNRPB2)	Q9Y2X3(NOP58)	P36896(ACVR1B)				O60318(MCM3AP)	P30405(PPIF)	P82932(MRPS6)	O75648(TRMU)	O75648(TRMU)	O60678(PRMT3)	O60678(PRMT3)
	Q16629(SFRS7)	Q9Y3A2(UTP11L)	O60673(REV3L)	Q14978(NOLC1)	O96017(CHEK2)	O60673(REV3L)	O75608(LYPLA1)		Q9Y3A2(UTP11L)	O43752(STX6)	O43592(XPOT)			P47914(RPL29)	P22307(SCP2)	P22392(NME1)	P11172(UMPS)	Q14197(ICT1)	Q9UGM6(WARS2)	Q9Y333(LSM2)	O43570(CA12)	P22087(FBL)	O43719(HTATSF1)	Q9Y333(LSM2)						Q9UHV9(PFDN2)				Q9HD33(MRPL47)	P49458(SRP9)	O43402(COX4NB)	P09874(PARP1)		P38646(HSPA9)				O60673(REV3L)	P36957(DLST)	Q01081(U2AF1)	O75884(RBBP9)	O75884(RBBP9)	O75347(TBCA)	O75347(TBCA)
	Q86V81(THOC4)		O75347(TBCA)	Q15046(KARS)	P00491(NP)	O75347(TBCA)	O75648(TRMU)			O43765(SGTA)	O43719(HTATSF1)			P49458(SRP9)	P22392(NME1)	P23396(RPS3)	P11474(ESRRA)	Q15046(KARS)	Q9Y285(FARSA)	Q9Y4Y9(LSM5)	O43592(XPOT)	P24347(MMP11)	O43752(STX6)	Q9Y4Y9(LSM5)						Q9Y276(BCS1L)				Q9NQ50(MRPL40)	P52597(HNRNPF)	O43422(PRKRIR)	P10827(THRA)		P40937(RFC5)				O60678(PRMT3)	P38646(HSPA9)	Q14103(HNRNPD)	O76071(CIAO1)	O76071(CIAO1)	O75394(MRPL33)	O75394(MRPL33)
	Q8WVM0(TFB1M)		O75394(MRPL33)	Q15393(SF3B3)	P02786(TFRC)	O75394(MRPL33)	O76071(CIAO1)			O60318(MCM3AP)	O43752(STX6)			P56211(ARPP-19)	P22570(FDXR)	P24539(ATP5F1)	P11940(PABPC1)	Q15056(EIF4H)			O43715(TRIAP1)	P27694(RPA1)	O43765(SGTA)											Q9P0J6(MRPL36)	P55769(NHP2L1)	O43505(B3GNT1)	P11474(ESRRA)		P41250(GARS)				O75347(TBCA)	P46199(MTIF2)	Q14493(SLBP)	O95433(AHSA1)	O95433(AHSA1)	O75648(TRMU)	O75648(TRMU)
	Q92499(DDX1)		O75608(LYPLA1)	Q16629(SFRS7)	P05198(EIF2S1)	O75608(LYPLA1)	O95433(AHSA1)			O60327(GLT25D2)	O43765(SGTA)			P82932(MRPS6)	P23396(RPS3)	P29692(EEF1D)	P17317(H2AFZ)	Q92499(DDX1)			O43719(HTATSF1)	P28062(PSMB8)	O60318(MCM3AP)											Q9UNX3(RPL26L1)	Q01081(U2AF1)	O43570(CA12)	P11940(PABPC1)		P41252(IARS)				O75394(MRPL33)	P53701(HCCS)	Q15393(SF3B3)	O95863(SNAI1)	O95863(SNAI1)	O75884(RBBP9)	O75884(RBBP9)
	Q92989(CLP1)		O75648(TRMU)	Q86V81(THOC4)	P05386(RPLP1)	O75648(TRMU)	O95445(APOM)			O60462(NRP2)	O60318(MCM3AP)			Q14197(ICT1)	P24539(ATP5F1)	P30566(ADSL)	P18754(RCC1)	Q9BPZ3()			O43752(STX6)	P36896(ACVR1B)	O60327(GLT25D2)											Q9Y2Q9(MRPS28)	Q12849(GRSF1)	O43592(XPOT)	P17317(H2AFZ)		P46199(MTIF2)				O75648(TRMU)	P54819(AK2)	Q86V81(THOC4)	O95983(MBD3)	O95983(MBD3)	O76071(CIAO1)	O76071(CIAO1)
	Q96F76(RNMTL1)		O76071(CIAO1)	Q8WVM0(TFB1M)	P06280(GLA)	O76071(CIAO1)	O95671(ASMTL)			O60673(REV3L)	O60327(GLT25D2)			Q15046(KARS)	P29692(EEF1D)	P41250(GARS)	P22087(FBL)	Q9BQ48(MRPL34)			O43765(SGTA)	P40306(PSMB10)	O60462(NRP2)											Q9Y2R5(MRPS17)	Q12996(CSTF3)	O43715(TRIAP1)	P18754(RCC1)		P48643(CCT5)				O75884(RBBP9)	P55809(OXCT1)	Q92552(MRPS27)	O96017(CHEK2)	O96017(CHEK2)	O95433(AHSA1)	O95433(AHSA1)
	Q96G21(IMP4)		O95433(AHSA1)	Q92499(DDX1)	P07195(LDHB)	O95433(AHSA1)	O95747(OXSR1)			O60779(SLC19A2)	O60462(NRP2)			Q15056(EIF4H)	P30566(ADSL)	P41252(IARS)	P22102(GART)	Q9BRJ2(MRPL45)			O43822(C21orf2)	P40937(RFC5)	O60673(REV3L)											Q9Y3D3(MRPS16)	Q14103(HNRNPD)	O43719(HTATSF1)	P19338(NCL)		P49736(MCM2)				O76071(CIAO1)	P82932(MRPS6)	Q92665(MRPS31)	P00167(CYB5A)	P00167(CYB5A)	O95863(SNAI1)	O95863(SNAI1)
	Q96G46(DUS3L)		O95445(APOM)	Q92989(CLP1)	P08579(SNRPB2)	O95445(APOM)	O95983(MBD3)			O75340(PDCD6)	O60673(REV3L)			Q92499(DDX1)	P41250(GARS)	P46199(MTIF2)	P22234(PAICS)	Q9BYD2(MRPL9)			O60318(MCM3AP)	P41250(GARS)	O60779(SLC19A2)											Q9Y3D9(MRPS23)	Q14493(SLBP)	O43752(STX6)	P22087(FBL)		P49759(CLK1)				O76094(SRP72)	Q04837(SSBP1)	Q96G21(IMP4)	P02786(TFRC)	P02786(TFRC)	O95983(MBD3)	O95983(MBD3)
	Q96SB4(SRPK1)		O95671(ASMTL)	Q96F76(RNMTL1)	P09874(PARP1)	O95671(ASMTL)	O96017(CHEK2)			O75347(TBCA)	O60779(SLC19A2)			Q9BPZ3()	P41252(IARS)	P46777(RPL5)	P22392(NME1)	Q9HD33(MRPL47)			O60327(GLT25D2)	P41252(IARS)	O75340(PDCD6)											Q9Y6G3(MRPL42)	Q15056(EIF4H)	O43765(SGTA)	P22090(RPS4Y1)		P50990(CCT8)				O95433(AHSA1)	Q12931(TRAP1)	Q9BQ48(MRPL34)	P04179(SOD2)	P04179(SOD2)	O96017(CHEK2)	O96017(CHEK2)
	Q9BWJ5(SF3B5)		O95747(OXSR1)	Q96G21(IMP4)	P10809(TLN1)	O95747(OXSR1)	P00491(NP)			O75394(MRPL33)	O75340(PDCD6)			Q9BQ48(MRPL34)	P46199(MTIF2)	P46976(GYG1)	P23497(SP100)	Q9P0J6(MRPL36)			O60462(NRP2)	P46976(GYG1)	O75347(TBCA)												Q15393(SF3B3)	O43822(C21orf2)	P22392(NME1)		P51151(RAB9A)				O95863(SNAI1)	Q86Y39(NDUFA11)	Q9BRJ2(MRPL45)	P06280(GLA)	P06280(GLA)	P00167(CYB5A)	P00167(CYB5A)
	Q9H840(GEMIN7)		O95983(MBD3)	Q96G46(DUS3L)	P11940(PABPC1)	O95983(MBD3)	P02786(TFRC)			O75608(LYPLA1)	O75347(TBCA)			Q9BRJ2(MRPL45)	P46777(RPL5)	P47914(RPL29)	P24539(ATP5F1)	Q9P2J5(LARS)			O60673(REV3L)	P49736(MCM2)	O75394(MRPL33)												Q16600(ZNF239)	O60318(MCM3AP)	P23396(RPS3)		P51532(SMARCA4)				O95983(MBD3)	Q8NI60(CABC1)	Q9BWJ5(SF3B5)	P06454(PTMA)	P06454(PTMA)	P02786(TFRC)	P02786(TFRC)
	Q9NY12(GAR1)		O96017(CHEK2)	Q96SB4(SRPK1)	P17317(H2AFZ)	O96017(CHEK2)	P04179(SOD2)			O75648(TRMU)	O75394(MRPL33)			Q9BYD2(MRPL9)	P46976(GYG1)	P49458(SRP9)	P27694(RPA1)	Q9UGM6(WARS2)			O60678(PRMT3)	P49759(CLK1)	O75508(CLDN11)												Q16629(SFRS7)	O60462(NRP2)	P23497(SP100)		P52597(HNRNPF)				O96017(CHEK2)	Q8TAA5(GRPEL2)	Q9BYC8(MRPL32)	P08574(CYC1)	P08574(CYC1)	P04179(SOD2)	P04179(SOD2)
	Q9UKF6(CPSF3)		P00167(CYB5A)	Q9BWJ5(SF3B5)	P18754(RCC1)	P00167(CYB5A)	P05198(EIF2S1)			O76071(CIAO1)	O75608(LYPLA1)			Q9HD33(MRPL47)	P47914(RPL29)	P56211(ARPP-19)	P29083(GTF2E1)	Q9UNX3(RPL26L1)			O60779(SLC19A2)	P50897(PPT1)	O75608(LYPLA1)												Q86V81(THOC4)	O60673(REV3L)	P27694(RPA1)		P53778(MAPK12)				P00167(CYB5A)	Q92552(MRPS27)	Q9BYD2(MRPL9)	P08579(SNRPB2)	P08579(SNRPB2)	P05386(RPLP1)	P05386(RPLP1)
	Q9UNQ2(DIMT1L)		P00441(SOD1)	Q9H840(GEMIN7)	P22087(FBL)	P00441(SOD1)	P05386(RPLP1)			O95433(AHSA1)	O75648(TRMU)			Q9NR45(NANS)	P48651(PTDSS1)	P56545(CTBP2)	P30048(PRDX3)	Q9Y285(FARSA)			O75340(PDCD6)	P52597(HNRNPF)	O75648(TRMU)												Q8NC51(SERBP1)	O60678(PRMT3)	P29692(EEF1D)		P54819(AK2)				P00441(SOD1)	Q92665(MRPS31)	Q9BYN8(MRPS26)	P09874(PARP1)	P09874(PARP1)	P06280(GLA)	P06280(GLA)
	Q9Y2X3(NOP58)		P00491(NP)	Q9NY12(GAR1)	P22090(RPS4Y1)	P00491(NP)	P06280(GLA)			O95445(APOM)	O76071(CIAO1)			Q9P0J6(MRPL36)	P49458(SRP9)	P82932(MRPS6)	P30566(ADSL)	Q9Y2B2(PIGL)			O75347(TBCA)	P53778(MAPK12)	O76071(CIAO1)												Q92499(DDX1)	O60779(SLC19A2)	P37108(SRP14)		Q06187(BTK)				P02786(TFRC)	Q96DA6(DNAJC19)	Q9H840(GEMIN7)	P10109(FDX1)	P10109(FDX1)	P06454(PTMA)	P06454(PTMA)
	Q9Y333(LSM2)		P02786(TFRC)	Q9P2J5(LARS)	P23396(RPS3)	P02786(TFRC)	P06454(PTMA)			O95671(ASMTL)	O95433(AHSA1)			Q9P2J5(LARS)	P56211(ARPP-19)	Q14197(ICT1)	P40937(RFC5)	Q9Y2R5(MRPS17)			O75394(MRPL33)	P54578(USP14)	O95433(AHSA1)												Q96F76(RNMTL1)	O75340(PDCD6)	P40937(RFC5)		Q12849(GRSF1)				P04179(SOD2)	Q9BQ48(MRPL34)	Q9HD33(MRPL47)	P10809(TLN1)	P10809(TLN1)	P08574(CYC1)	P08574(CYC1)
	Q9Y3A2(UTP11L)		P04179(SOD2)	Q9UGM6(WARS2)	P24347(MMP11)	P04179(SOD2)	P07195(LDHB)			O95747(OXSR1)	O95445(APOM)			Q9UGM6(WARS2)	P56545(CTBP2)	Q15046(KARS)	P41250(GARS)	Q9Y3D3(MRPS16)			O75508(CLDN11)	P55769(NHP2L1)	O95445(APOM)												Q9NY12(GAR1)	O75347(TBCA)	P46199(MTIF2)		Q12931(TRAP1)				P05198(EIF2S1)	Q9BRJ2(MRPL45)	Q9NQ50(MRPL40)	P10827(THRA)	P10827(THRA)	P08579(SNRPB2)	P08579(SNRPB2)
	Q9Y4Y9(LSM5)		P05198(EIF2S1)	Q9UKF6(CPSF3)	P27694(RPA1)	P05198(EIF2S1)	P08579(SNRPB2)			O95983(MBD3)	O95671(ASMTL)			Q9UNX3(RPL26L1)	P82932(MRPS6)	Q15056(EIF4H)	P41252(IARS)	Q9Y673(ALG5)			O75608(LYPLA1)	P56182(RRP1)	O95671(ASMTL)												Q9UKF6(CPSF3)	O75394(MRPL33)	P46777(RPL5)		Q13470(TNK1)				P05386(RPLP1)	Q9BTZ2(DHRS4)	Q9NY12(GAR1)	P11474(ESRRA)	P11474(ESRRA)	P09874(PARP1)	P09874(PARP1)
			P05386(RPLP1)	Q9UNQ2(DIMT1L)	P28062(PSMB8)	P05386(RPLP1)	P09417(QDPR)			O96017(CHEK2)	O95715(CXCL14)			Q9Y285(FARSA)	Q14197(ICT1)	Q92499(DDX1)	P49247(RPIA)	Q9Y6G3(MRPL42)			O75648(TRMU)	P78527(PRKDC)	O95715(CXCL14)												Q9Y2Q9(MRPS28)	O75508(CLDN11)	P47914(RPL29)		Q13823(GNL2)				P06280(GLA)	Q9BV35(SLC25A23)	Q9P0J6(MRPL36)	P11509(CYP2A6)	P11509(CYP2A6)	P10109(FDX1)	P10109(FDX1)
			P06280(GLA)	Q9Y285(FARSA)	P29466(CASP1)	P06454(PTMA)	P09874(PARP1)			P00167(CYB5A)	O95747(OXSR1)			Q9Y2B2(PIGL)	Q15046(KARS)	Q9BPZ3()	P49736(MCM2)				O76071(CIAO1)	Q01081(U2AF1)	O95747(OXSR1)												Q9Y333(LSM2)	O75608(LYPLA1)	P49458(SRP9)		Q14103(HNRNPD)				P06454(PTMA)	Q9BXH1(BBC3)	Q9UNX3(RPL26L1)	P13073(COX4I1)	P13073(COX4I1)	P10809(TLN1)	P10809(TLN1)
			P06454(PTMA)	Q9Y2X3(NOP58)	P29692(EEF1D)	P07195(LDHB)	P10109(FDX1)			P00441(SOD1)	O95983(MBD3)			Q9Y2R5(MRPS17)	Q15056(EIF4H)	Q9BQ48(MRPL34)	P51532(SMARCA4)				O95433(AHSA1)	Q04837(SSBP1)	O95983(MBD3)												Q9Y4Y9(LSM5)	O75648(TRMU)	P49736(MCM2)		Q14566(MCM6)				P07195(LDHB)	Q9BYC8(MRPL32)	Q9Y2Q9(MRPS28)	P13995(MTHFD2)	P13995(MTHFD2)	P10827(THRA)	P10827(THRA)
			P07195(LDHB)	Q9Y333(LSM2)	P30405(PPIF)	P07203(GPX1)	P10809(TLN1)			P00491(NP)	O96017(CHEK2)			Q9Y3D3(MRPS16)	Q92499(DDX1)	Q9BRJ2(MRPL45)	P52434(POLR2H)				O95445(APOM)	Q05923(DUSP2)	O96017(CHEK2)												Q9Y580(REXO2)	O76094(SRP72)	P51532(SMARCA4)		Q14978(NOLC1)				P08574(CYC1)	Q9BYD2(MRPL9)	Q9Y2R5(MRPS17)	P17317(H2AFZ)	P17317(H2AFZ)	P11474(ESRRA)	P11474(ESRRA)
			P07203(GPX1)	Q9Y3A2(UTP11L)	P36896(ACVR1B)	P08574(CYC1)	P10827(THRA)			P01584(IL1B)	P00167(CYB5A)			Q9Y673(ALG5)	Q9BPZ3()	Q9BV20(MRI1)	P52597(HNRNPF)				O95671(ASMTL)	Q06187(BTK)	P00167(CYB5A)													O95433(AHSA1)	P52434(POLR2H)		Q15046(KARS)				P08579(SNRPB2)	Q9BYN8(MRPS26)	Q9Y333(LSM2)	P17900(GM2A)	P17900(GM2A)	P11509(CYP2A6)	P11509(CYP2A6)
			P08574(CYC1)	Q9Y4Y9(LSM5)	P36957(DLST)	P08579(SNRPB2)	P11172(UMPS)			P02786(TFRC)	P00441(SOD1)			Q9Y6G3(MRPL42)	Q9BQ48(MRPL34)	Q9BYD2(MRPL9)	P53567(CEBPG)				O95715(CXCL14)	Q12792(TWF1)	P00441(SOD1)													O95445(APOM)	P52597(HNRNPF)		Q15056(EIF4H)				P09874(PARP1)	Q9H936(SLC25A22)	Q9Y3A2(UTP11L)	P18754(RCC1)	P18754(RCC1)	P12036(NEFH)	P12036(NEFH)
			P08579(SNRPB2)		P38646(HSPA9)	P09417(QDPR)	P11474(ESRRA)			P04179(SOD2)	P00491(NP)				Q9BRJ2(MRPL45)	Q9HD33(MRPL47)	P54198(HIRA)				O95747(OXSR1)	Q12849(GRSF1)	P00491(NP)													O95476(DULLARD)	P53567(CEBPG)		Q16629(SFRS7)				P10109(FDX1)	Q9HC21(SLC25A19)	Q9Y3D3(MRPS16)	P19338(NCL)	P19338(NCL)	P13073(COX4I1)	P13073(COX4I1)
			P09417(QDPR)		P40306(PSMB10)	P09874(PARP1)	P11926(ODC1)			P05198(EIF2S1)	P01584(IL1B)				Q9BV20(MRI1)	Q9NR45(NANS)	P54274(TERF1)				O95863(SNAI1)	Q12996(CSTF3)	P01584(IL1B)													O95671(ASMTL)	P54198(HIRA)		Q86V81(THOC4)				P10809(TLN1)	Q9HD33(MRPL47)	Q9Y3D9(MRPS23)	P21796(VDAC1)	P21796(VDAC1)	P13533(MYH6)	P13533(MYH6)
			P09874(PARP1)		P40937(RFC5)	P10109(FDX1)	P11940(PABPC1)			P05386(RPLP1)	P02786(TFRC)				Q9BYD2(MRPL9)	Q9NWU1(OXSM)	P54819(AK2)				O95983(MBD3)	Q13185(CBX3)	P02786(TFRC)													O95715(CXCL14)	P54274(TERF1)		Q8IUN3(KIF26B)				P10827(THRA)	Q9NQ50(MRPL40)	Q9Y4Y9(LSM5)	P22087(FBL)	P22087(FBL)	P13995(MTHFD2)	P13995(MTHFD2)
			P10109(FDX1)		P41250(GARS)	P10809(TLN1)	P17317(H2AFZ)			P06454(PTMA)	P04179(SOD2)				Q9BZX2(UCK2)	Q9P0J6(MRPL36)	P55769(NHP2L1)				O96017(CHEK2)	Q13470(TNK1)	P04179(SOD2)													O95747(OXSR1)	P55769(NHP2L1)		Q8NBU5(ATAD1)				P11474(ESRRA)	Q9P0J6(MRPL36)	Q9Y6G3(MRPL42)	P22307(SCP2)	P22307(SCP2)	P17317(H2AFZ)	P17317(H2AFZ)
			P10809(TLN1)		P41252(IARS)	P10827(THRA)	P17900(GM2A)			P07195(LDHB)	P05198(EIF2S1)				Q9HD33(MRPL47)	Q9P2J5(LARS)	P56182(RRP1)				P00167(CYB5A)	Q14103(HNRNPD)	P05198(EIF2S1)													O95863(SNAI1)	P78527(PRKDC)		Q8NDM4(TBRG4)				P11509(CYP2A6)	Q9UGM6(WARS2)		P22392(NME1)	P22392(NME1)	P17900(GM2A)	P17900(GM2A)
			P10827(THRA)		P46199(MTIF2)	P11172(UMPS)	P18754(RCC1)			P07203(GPX1)	P05386(RPLP1)				Q9NR45(NANS)	Q9UGM6(WARS2)	P78527(PRKDC)				P00441(SOD1)	Q14137(BOP1)	P05386(RPLP1)													O95983(MBD3)	Q00403(GTF2B)		Q8TAA5(GRPEL2)				P11940(PABPC1)	Q9Y276(BCS1L)		P22570(FDXR)	P22570(FDXR)	P18754(RCC1)	P18754(RCC1)
			P11172(UMPS)		P46777(RPL5)	P11474(ESRRA)	P22087(FBL)			P08574(CYC1)	P06280(GLA)				Q9NWU1(OXSM)	Q9UNX3(RPL26L1)	Q00403(GTF2B)				P00491(NP)	Q14493(SLBP)	P06454(PTMA)													O96017(CHEK2)	Q01081(U2AF1)		Q92499(DDX1)				P12036(NEFH)	Q9Y2Q9(MRPS28)		P23434(GCSH)	P23434(GCSH)	P19338(NCL)	P19338(NCL)
			P11474(ESRRA)		P46976(GYG1)	P11509(CYP2A6)	P22090(RPS4Y1)			P08579(SNRPB2)	P06454(PTMA)				Q9P0J6(MRPL36)	Q9Y285(FARSA)	Q01081(U2AF1)				P01584(IL1B)	Q14566(MCM6)	P07195(LDHB)													P00167(CYB5A)	Q04837(SSBP1)		Q92737(RASL10A)				P13073(COX4I1)	Q9Y2R5(MRPS17)		P23497(SP100)	P23497(SP100)	P21796(VDAC1)	P21796(VDAC1)
			P11509(CYP2A6)		P47914(RPL29)	P11926(ODC1)	P22102(GART)			P09417(QDPR)	P07195(LDHB)				Q9P2J5(LARS)	Q9Y2B2(PIGL)	Q04837(SSBP1)				P02786(TFRC)	Q14978(NOLC1)	P07203(GPX1)													P00441(SOD1)	Q06455(RUNX1T1)		Q92963(RIT1)				P13533(MYH6)	Q9Y3D3(MRPS16)		P24539(ATP5F1)	P24539(ATP5F1)	P22087(FBL)	P22087(FBL)
			P11926(ODC1)		P48643(CCT5)	P11940(PABPC1)	P22234(PAICS)			P09874(PARP1)	P07203(GPX1)				Q9UGM6(WARS2)	Q9Y2R5(MRPS17)	Q06455(RUNX1T1)				P04179(SOD2)	Q15046(KARS)	P08574(CYC1)													P00491(NP)	Q12849(GRSF1)		Q92989(CLP1)				P13693(TPT1)	Q9Y3D9(MRPS23)		P27694(RPA1)	P27694(RPA1)	P22090(RPS4Y1)	P22090(RPS4Y1)
			P11940(PABPC1)		P49247(RPIA)	P13073(COX4I1)	P22307(SCP2)			P10109(FDX1)	P08574(CYC1)				Q9UJA2(CRLS1)	Q9Y3D3(MRPS16)	Q12849(GRSF1)				P05198(EIF2S1)	Q15393(SF3B3)	P08579(SNRPB2)													P01584(IL1B)	Q12996(CSTF3)		Q96G46(DUS3L)				P13995(MTHFD2)	Q9Y3E5(PTRH2)		P29083(GTF2E1)	P29083(GTF2E1)	P22307(SCP2)	P22307(SCP2)
			P13073(COX4I1)		P49458(SRP9)	P13995(MTHFD2)	P22392(NME1)			P10809(TLN1)	P08579(SNRPB2)				Q9UNX3(RPL26L1)	Q9Y617(PSAT1)	Q12996(CSTF3)				P05386(RPLP1)	Q16629(SFRS7)	P09417(QDPR)													P02786(TFRC)	Q13133(NR1H3)		Q96I44(STK40)				P17317(H2AFZ)	Q9Y5L4(TIMM13)		P30048(PRDX3)	P30048(PRDX3)	P22392(NME1)	P22392(NME1)
			P13995(MTHFD2)		P49736(MCM2)	P17317(H2AFZ)	P22570(FDXR)			P10827(THRA)	P09417(QDPR)				Q9Y285(FARSA)	Q9Y673(ALG5)	Q13133(NR1H3)				P06280(GLA)	Q86V81(THOC4)	P09874(PARP1)													P04179(SOD2)	Q13422(IKZF1)		Q96RU7(TRIB3)				P17900(GM2A)	Q9Y6G3(MRPL42)		P30405(PPIF)	P30405(PPIF)	P22570(FDXR)	P22570(FDXR)
			P17317(H2AFZ)		P49759(CLK1)	P17900(GM2A)	P23396(RPS3)			P11172(UMPS)	P09874(PARP1)				Q9Y2B2(PIGL)	Q9Y6G3(MRPL42)	Q13185(CBX3)				P06454(PTMA)	Q8WUJ0(STYX)	P10109(FDX1)													P05198(EIF2S1)	Q14103(HNRNPD)		Q96SB4(SRPK1)				P18754(RCC1)			P31948(STIP1)	P31948(STIP1)	P23396(RPS3)	P23396(RPS3)
			P17900(GM2A)		P50897(PPT1)	P18754(RCC1)	P23434(GCSH)			P11474(ESRRA)	P10109(FDX1)				Q9Y2R5(MRPS17)		Q13422(IKZF1)				P07195(LDHB)	Q8WVM0(TFB1M)	P10809(TLN1)													P05386(RPLP1)	Q14197(ICT1)		Q9BZX2(UCK2)				P19338(NCL)			P36957(DLST)	P36957(DLST)	P23434(GCSH)	P23434(GCSH)
			P18754(RCC1)		P50990(CCT8)	P22087(FBL)	P23497(SP100)			P11509(CYP2A6)	P10809(TLN1)				Q9Y3D3(MRPS16)		Q14103(HNRNPD)				P07203(GPX1)	Q8WZA4(COLEC12)	P10827(THRA)													P06280(GLA)	Q14469(HES1)		Q9H0P0(NT5C3)				P21796(VDAC1)			P38646(HSPA9)	P38646(HSPA9)	P23497(SP100)	P23497(SP100)
			P22087(FBL)		P52597(HNRNPF)	P22090(RPS4Y1)	P24347(MMP11)			P11926(ODC1)	P10827(THRA)				Q9Y617(PSAT1)		Q14137(BOP1)				P08574(CYC1)	Q92499(DDX1)	P11172(UMPS)													P07195(LDHB)	Q14493(SLBP)		Q9HAQ2(KIF9)				P22087(FBL)			P39687(ANP32A)	P39687(ANP32A)	P24539(ATP5F1)	P24539(ATP5F1)
			P22090(RPS4Y1)		P53582(METAP1)	P22102(GART)	P24539(ATP5F1)			P11940(PABPC1)	P11172(UMPS)				Q9Y673(ALG5)		Q14145(KEAP1)				P08579(SNRPB2)	Q92989(CLP1)	P11474(ESRRA)													P07203(GPX1)	Q14566(MCM6)		Q9NTK5(OLA1)				P22090(RPS4Y1)			P40937(RFC5)	P40937(RFC5)	P27694(RPA1)	P27694(RPA1)
			P22102(GART)		P53778(MAPK12)	P22234(PAICS)	P27694(RPA1)			P13073(COX4I1)	P11474(ESRRA)				Q9Y6G3(MRPL42)		Q14469(HES1)				P09417(QDPR)	Q96F76(RNMTL1)	P11509(CYP2A6)													P08574(CYC1)	Q14739(LBR)		Q9NXB8(PXK)				P22102(GART)			P46087(NOP2)	P46087(NOP2)	P29083(GTF2E1)	P29083(GTF2E1)
			P22234(PAICS)		P54578(USP14)	P22307(SCP2)	P28062(PSMB8)			P13995(MTHFD2)	P11509(CYP2A6)						Q14493(SLBP)				P09874(PARP1)	Q96G21(IMP4)	P11926(ODC1)													P08579(SNRPB2)	Q15032(R3HDM1)		Q9NYA1(SPHK1)				P22307(SCP2)			P46199(MTIF2)	P46199(MTIF2)	P30048(PRDX3)	P30048(PRDX3)
			P22307(SCP2)		P55769(NHP2L1)	P22392(NME1)	P29083(GTF2E1)			P17317(H2AFZ)	P11926(ODC1)						Q14566(MCM6)				P10109(FDX1)	Q96G46(DUS3L)	P11940(PABPC1)													P09417(QDPR)	Q15046(KARS)		Q9NYY3(PLK2)				P22392(NME1)			P49458(SRP9)	P49458(SRP9)	P30405(PPIF)	P30405(PPIF)
			P22392(NME1)		P55809(OXCT1)	P22570(FDXR)	P29466(CASP1)			P17900(GM2A)	P11940(PABPC1)						Q14978(NOLC1)				P10809(TLN1)	Q96I44(STK40)	P13073(COX4I1)													P09874(PARP1)	Q15056(EIF4H)		Q9P0X2(HSPA14)				P22570(FDXR)			P49736(MCM2)	P49736(MCM2)	P31948(STIP1)	P31948(STIP1)
			P22570(FDXR)		P56182(RRP1)	P23396(RPS3)	P29692(EEF1D)			P18754(RCC1)	P13073(COX4I1)						Q15046(KARS)				P10827(THRA)	Q96RU7(TRIB3)	P13591(NCAM1)													P10109(FDX1)	Q15329(E2F5)		Q9P2J5(LARS)				P23396(RPS3)			P49759(CLK1)	P49759(CLK1)	P36957(DLST)	P36957(DLST)
			P23396(RPS3)		P56211(ARPP-19)	P23434(GCSH)	P30048(PRDX3)			P21796(VDAC1)	P13533(MYH6)						Q15329(E2F5)				P11172(UMPS)	Q96SB4(SRPK1)	P13995(MTHFD2)													P10809(TLN1)	Q15393(SF3B3)		Q9UGM6(WARS2)				P23434(GCSH)			P50897(PPT1)	P50897(PPT1)	P38646(HSPA9)	P38646(HSPA9)
			P23434(GCSH)		P78527(PRKDC)	P23497(SP100)	P30405(PPIF)			P22087(FBL)	P13591(NCAM1)						Q15393(SF3B3)				P11474(ESRRA)	Q99708(RBBP8)	P17317(H2AFZ)													P10827(THRA)	Q15561(TEAD4)		Q9Y265(RUVBL1)				P23497(SP100)			P51151(RAB9A)	P51151(RAB9A)	P39687(ANP32A)	P39687(ANP32A)
			P23497(SP100)		P82932(MRPS6)	P24347(MMP11)	P30566(ADSL)			P22090(RPS4Y1)	P13995(MTHFD2)						Q15561(TEAD4)				P11509(CYP2A6)	Q99933(BAG1)	P17900(GM2A)													P11172(UMPS)	Q16342(PDCD2)		Q9Y276(BCS1L)				P24539(ATP5F1)			P51532(SMARCA4)	P51532(SMARCA4)	P40937(RFC5)	P40937(RFC5)
			P24347(MMP11)		Q00796(SORD)	P24539(ATP5F1)	P36896(ACVR1B)			P22102(GART)	P15529(CD46)						Q15573(TAF1A)				P11926(ODC1)	Q9BQ83(SULT1A3)	P18754(RCC1)													P11474(ESRRA)	Q16533(SNAPC1)		Q9Y285(FARSA)				P27694(RPA1)			P52434(POLR2H)	P52434(POLR2H)	P46087(NOP2)	P46087(NOP2)
			P24539(ATP5F1)		Q01081(U2AF1)	P27694(RPA1)	P36957(DLST)			P22234(PAICS)	P17317(H2AFZ)						Q16533(SNAPC1)				P11940(PABPC1)	Q9BR09(NEURL2)	P21796(VDAC1)													P11509(CYP2A6)	Q16600(ZNF239)		Q9Y295(DRG1)				P28062(PSMB8)			P52597(HNRNPF)	P52597(HNRNPF)	P46199(MTIF2)	P46199(MTIF2)
			P27694(RPA1)		Q04837(SSBP1)	P28062(PSMB8)	P38646(HSPA9)			P22307(SCP2)	P17900(GM2A)						Q16600(ZNF239)				P12036(NEFH)	Q9BWJ5(SF3B5)	P22087(FBL)													P11926(ODC1)	Q16629(SFRS7)		Q9Y580(REXO2)				P29083(GTF2E1)			P53567(CEBPG)	P53567(CEBPG)	P46777(RPL5)	P46777(RPL5)
			P28062(PSMB8)		Q05923(DUSP2)	P29083(GTF2E1)	P40306(PSMB10)			P22392(NME1)	P18754(RCC1)						Q16629(SFRS7)				P13073(COX4I1)	Q9C029(TRIM7)	P22090(RPS4Y1)													P11940(PABPC1)	Q86V81(THOC4)						P29466(CASP1)			P53701(HCCS)	P53701(HCCS)	P47914(RPL29)	P47914(RPL29)
			P29083(GTF2E1)		Q06187(BTK)	P29466(CASP1)	P40937(RFC5)			P22570(FDXR)	P21796(VDAC1)						Q86V81(THOC4)				P13533(MYH6)	Q9H840(GEMIN7)	P22102(GART)													P12036(NEFH)	Q8IVH2(FOXP4)						P29692(EEF1D)			P54105(CLNS1A)	P54105(CLNS1A)	P49458(SRP9)	P49458(SRP9)
			P29466(CASP1)		Q12792(TWF1)	P29692(EEF1D)	P41250(GARS)			P23396(RPS3)	P22087(FBL)						Q8IVH2(FOXP4)				P13591(NCAM1)	Q9NQZ2(UTP3)	P22234(PAICS)													P13073(COX4I1)	Q8N5P1(ZC3H8)						P30048(PRDX3)			P54198(HIRA)	P54198(HIRA)	P49736(MCM2)	P49736(MCM2)
			P29692(EEF1D)		Q12794(HYAL1)	P30048(PRDX3)	P41252(IARS)			P23434(GCSH)	P22090(RPS4Y1)						Q8NB50(ZFP62)				P13995(MTHFD2)	Q9NR45(NANS)	P22307(SCP2)													P13533(MYH6)	Q8NB15(ZNF511)						P30405(PPIF)			P54274(TERF1)	P54274(TERF1)	P49759(CLK1)	P49759(CLK1)
			P30048(PRDX3)		Q12849(GRSF1)	P30405(PPIF)	P46199(MTIF2)			P23497(SP100)	P22102(GART)						Q8NC99(ZNF791)				P15529(CD46)	Q9NRN9(METTL5)	P22392(NME1)													P13591(NCAM1)	Q8NB50(ZFP62)						P31948(STIP1)			P54819(AK2)	P54819(AK2)	P50897(PPT1)	P50897(PPT1)
			P30405(PPIF)		Q12931(TRAP1)	P30566(ADSL)	P46777(RPL5)			P24347(MMP11)	P22234(PAICS)						Q8TEK0(PHF15)				P17317(H2AFZ)	Q9NXB8(PXK)	P22570(FDXR)													P13693(TPT1)	Q8NC51(SERBP1)						P36957(DLST)			P55060(CSE1L)	P55060(CSE1L)	P51151(RAB9A)	P51151(RAB9A)
			P30566(ADSL)		Q12996(CSTF3)	P36896(ACVR1B)	P46976(GYG1)			P24539(ATP5F1)	P22307(SCP2)						Q8WVM0(TFB1M)				P17342(NPR3)	Q9NXP7(GIN1)	P23396(RPS3)													P13995(MTHFD2)	Q8NC99(ZNF791)						P37108(SRP14)			P55769(NHP2L1)	P55769(NHP2L1)	P51532(SMARCA4)	P51532(SMARCA4)
			P36896(ACVR1B)		Q13185(CBX3)	P36957(DLST)	P47914(RPL29)			P27694(RPA1)	P22392(NME1)						Q92499(DDX1)				P17900(GM2A)	Q9NY12(GAR1)	P23434(GCSH)													P15529(CD46)	Q8TBK6(ZCCHC10)						P38646(HSPA9)			P55809(OXCT1)	P55809(OXCT1)	P52434(POLR2H)	P52434(POLR2H)
			P36957(DLST)		Q13470(TNK1)	P38646(HSPA9)	P48643(CCT5)			P28062(PSMB8)	P22570(FDXR)						Q92989(CLP1)				P18754(RCC1)	Q9NYY3(PLK2)	P23497(SP100)													P17317(H2AFZ)	Q8WY91(THAP4)						P39687(ANP32A)			P56182(RRP1)	P56182(RRP1)	P52597(HNRNPF)	P52597(HNRNPF)
			P38646(HSPA9)		Q13867(BLMH)	P40306(PSMB10)	P48651(PTDSS1)			P29083(GTF2E1)	P23396(RPS3)						Q96F76(RNMTL1)				P21796(VDAC1)	Q9P2J5(LARS)	P24347(MMP11)													P17342(NPR3)	Q92499(DDX1)						P40306(PSMB10)			P56545(CTBP2)	P56545(CTBP2)	P53567(CEBPG)	P53567(CEBPG)
			P40306(PSMB10)		Q14103(HNRNPD)	P40937(RFC5)	P49247(RPIA)			P29466(CASP1)	P23434(GCSH)						Q96G21(IMP4)				P22087(FBL)	Q9UBF6(RNF7)	P24539(ATP5F1)													P17900(GM2A)	Q96F76(RNMTL1)						P40937(RFC5)			P56589(PEX3)	P56589(PEX3)	P53701(HCCS)	P53701(HCCS)
			P40937(RFC5)		Q14137(BOP1)	P41250(GARS)	P49458(SRP9)			P29692(EEF1D)	P23497(SP100)						Q96G46(DUS3L)				P22090(RPS4Y1)	Q9UGM6(WARS2)	P27694(RPA1)													P18754(RCC1)	Q96G46(DUS3L)						P41250(GARS)			P78527(PRKDC)	P78527(PRKDC)	P54105(CLNS1A)	P54105(CLNS1A)
			P41250(GARS)		Q14197(ICT1)	P41252(IARS)	P49736(MCM2)			P30048(PRDX3)	P24347(MMP11)						Q96HZ4(HES6)				P22102(GART)	Q9UI42(CPA4)	P28062(PSMB8)													P19338(NCL)	Q96HZ4(HES6)						P41252(IARS)			P82932(MRPS6)	P82932(MRPS6)	P54198(HIRA)	P54198(HIRA)
			P41252(IARS)		Q14493(SLBP)	P46199(MTIF2)	P49759(CLK1)			P30405(PPIF)	P24539(ATP5F1)						Q96RU7(TRIB3)				P22234(PAICS)	Q9UKF6(CPSF3)	P29083(GTF2E1)													P21796(VDAC1)	Q9BU19(ZNF692)						P46087(NOP2)			Q00403(GTF2B)	Q00403(GTF2B)	P54274(TERF1)	P54274(TERF1)
			P46199(MTIF2)		Q14566(MCM6)	P46777(RPL5)	P50897(PPT1)			P30566(ADSL)	P27694(RPA1)						Q96SB4(SRPK1)				P22307(SCP2)	Q9UNQ2(DIMT1L)	P29275(ADORA2B)													P22087(FBL)	Q9BWG4(SSBP4)						P46199(MTIF2)			Q01081(U2AF1)	Q01081(U2AF1)	P54819(AK2)	P54819(AK2)
			P46777(RPL5)		Q14978(NOLC1)	P46976(GYG1)	P50990(CCT8)			P32238(CCKAR)	P27930(IL1R2)						Q99708(RBBP8)				P22392(NME1)	Q9Y232(CDYL)	P29466(CASP1)													P22090(RPS4Y1)	Q9C0J9(BHLHE41)						P46777(RPL5)			Q04837(SSBP1)	Q04837(SSBP1)	P55060(CSE1L)	P55060(CSE1L)
			P46976(GYG1)		Q15046(KARS)	P47914(RPL29)	P51532(SMARCA4)			P36896(ACVR1B)	P28062(PSMB8)						Q9BQ83(SULT1A3)				P22570(FDXR)	Q9Y265(RUVBL1)	P29692(EEF1D)													P22102(GART)	Q9H4Q4(PRDM12)						P47914(RPL29)			Q05923(DUSP2)	Q05923(DUSP2)	P55769(NHP2L1)	P55769(NHP2L1)
			P47914(RPL29)		Q15056(EIF4H)	P48643(CCT5)	P52434(POLR2H)			P36957(DLST)	P29083(GTF2E1)						Q9BWJ5(SF3B5)				P23396(RPS3)	Q9Y285(FARSA)	P30048(PRDX3)													P22234(PAICS)	Q9NQV6(PRDM10)						P49247(RPIA)			Q06455(RUNX1T1)	Q06455(RUNX1T1)	P55809(OXCT1)	P55809(OXCT1)
			P48643(CCT5)		Q15393(SF3B3)	P48651(PTDSS1)	P52597(HNRNPF)			P37108(SRP14)	P29275(ADORA2B)						Q9C0J9(BHLHE41)				P23434(GCSH)	Q9Y2B2(PIGL)	P30405(PPIF)													P22307(SCP2)	Q9NR55(BATF3)						P49407(ARRB1)			Q12794(HYAL1)	Q12794(HYAL1)	P56182(RRP1)	P56182(RRP1)
			P48651(PTDSS1)		Q16629(SFRS7)	P49247(RPIA)	P53567(CEBPG)			P38646(HSPA9)	P29466(CASP1)						Q9H0P0(NT5C3)				P23497(SP100)	Q9Y2X3(NOP58)	P30566(ADSL)													P22392(NME1)	Q9NXP7(GIN1)						P49458(SRP9)			Q12931(TRAP1)	Q12931(TRAP1)	P56545(CTBP2)	P56545(CTBP2)
			P49247(RPIA)		Q7Z4W1(DCXR)	P49458(SRP9)	P53582(METAP1)			P39687(ANP32A)	P29692(EEF1D)						Q9H4Q4(PRDM12)				P24347(MMP11)	Q9Y333(LSM2)	P32238(CCKAR)													P22570(FDXR)	Q9NY12(GAR1)						P49736(MCM2)			Q12996(CSTF3)	Q12996(CSTF3)	P56589(PEX3)	P56589(PEX3)
			P49458(SRP9)		Q86V81(THOC4)	P49736(MCM2)	P53778(MAPK12)			P40306(PSMB10)	P30048(PRDX3)						Q9H840(GEMIN7)				P24539(ATP5F1)	Q9Y3A2(UTP11L)	P33765(ADORA3)													P23396(RPS3)	Q9UFF9(CNOT8)						P49759(CLK1)			Q13133(NR1H3)	Q13133(NR1H3)	P78527(PRKDC)	P78527(PRKDC)
			P49736(MCM2)		Q8NI60(CABC1)	P49759(CLK1)	P54198(HIRA)			P40937(RFC5)	P30405(PPIF)						Q9NQV6(PRDM10)				P27694(RPA1)	Q9Y4Y9(LSM5)	P36896(ACVR1B)													P23434(GCSH)	Q9UKF6(CPSF3)						P49914(MTHFS)			Q13185(CBX3)	Q13185(CBX3)	P82932(MRPS6)	P82932(MRPS6)
			P49759(CLK1)		Q8TAA5(GRPEL2)	P49914(MTHFS)	P54274(TERF1)			P41250(GARS)	P30566(ADSL)						Q9NQZ2(UTP3)				P27930(IL1R2)	Q9Y5P8(PPP2R3B)	P36957(DLST)													P23497(SP100)	Q9Y2Q9(MRPS28)						P50897(PPT1)			Q13422(IKZF1)	Q13422(IKZF1)	Q00403(GTF2B)	Q00403(GTF2B)
			P49914(MTHFS)		Q8WUJ0(STYX)	P50897(PPT1)	P54578(USP14)			P41252(IARS)	P32238(CCKAR)						Q9NR55(BATF3)				P28062(PSMB8)	Q9Y5T5(USP16)	P37108(SRP14)													P24347(MMP11)	Q9Y2R5(MRPS17)						P50990(CCT8)			Q13428(TCOF1)	Q13428(TCOF1)	Q01081(U2AF1)	Q01081(U2AF1)
			P50897(PPT1)		Q8WVM0(TFB1M)	P50990(CCT8)	P54819(AK2)			P46087(NOP2)	P33765(ADORA3)						Q9NXP7(GIN1)				P29083(GTF2E1)	Q9Y673(ALG5)	P38646(HSPA9)													P24539(ATP5F1)	Q9Y2S0(POLR1D)						P51151(RAB9A)			Q13823(GNL2)	Q13823(GNL2)	Q04837(SSBP1)	Q04837(SSBP1)
			P50990(CCT8)		Q8WZA4(COLEC12)	P51532(SMARCA4)	P55058(PLTP)			P46199(MTIF2)	P36896(ACVR1B)						Q9NY12(GAR1)				P29275(ADORA2B)	Q9Y6I4(USP3)	P39687(ANP32A)													P27694(RPA1)	Q9Y333(LSM2)						P51532(SMARCA4)			Q13867(BLMH)	Q13867(BLMH)	Q05923(DUSP2)	Q05923(DUSP2)
			P51532(SMARCA4)		Q92499(DDX1)	P52434(POLR2H)	P55769(NHP2L1)			P46777(RPL5)	P36957(DLST)						Q9P2J5(LARS)				P29466(CASP1)		P40306(PSMB10)													P27930(IL1R2)	Q9Y4Y9(LSM5)						P52434(POLR2H)			Q14103(HNRNPD)	Q14103(HNRNPD)	Q06455(RUNX1T1)	Q06455(RUNX1T1)
			P52434(POLR2H)		Q92989(CLP1)	P52597(HNRNPF)	P55809(OXCT1)			P46976(GYG1)	P37108(SRP14)						Q9UFF9(CNOT8)				P29692(EEF1D)		P40937(RFC5)													P28062(PSMB8)	Q9Y580(REXO2)						P52597(HNRNPF)			Q14137(BOP1)	Q14137(BOP1)	Q12792(TWF1)	Q12792(TWF1)
			P52597(HNRNPF)		Q96BP3(PPWD1)	P53567(CEBPG)	P56182(RRP1)			P47914(RPL29)	P38646(HSPA9)						Q9UGM6(WARS2)				P30048(PRDX3)		P41250(GARS)													P29083(GTF2E1)	Q9Y5R5(DMRT2)						P53567(CEBPG)			Q14469(HES1)	Q14469(HES1)	Q12794(HYAL1)	Q12794(HYAL1)
			P53567(CEBPG)		Q96DA6(DNAJC19)	P53582(METAP1)	P56211(ARPP-19)			P48643(CCT5)	P39687(ANP32A)						Q9UI42(CPA4)				P30405(PPIF)		P41252(IARS)													P29275(ADORA2B)							P53701(HCCS)			Q14493(SLBP)	Q14493(SLBP)	Q12931(TRAP1)	Q12931(TRAP1)
			P53582(METAP1)		Q96F76(RNMTL1)	P53701(HCCS)	P56545(CTBP2)			P48651(PTDSS1)	P40306(PSMB10)						Q9UKF6(CPSF3)				P30566(ADSL)		P43487(RANBP1)													P29466(CASP1)							P53778(MAPK12)			Q14566(MCM6)	Q14566(MCM6)	Q12996(CSTF3)	Q12996(CSTF3)
			P53701(HCCS)		Q96G21(IMP4)	P53778(MAPK12)	P78527(PRKDC)			P48745(NOV)	P40937(RFC5)						Q9UNQ2(DIMT1L)				P31948(STIP1)		P46087(NOP2)													P29692(EEF1D)							P54105(CLNS1A)			Q14573(ITPR3)	Q14573(ITPR3)	Q13133(NR1H3)	Q13133(NR1H3)
			P53778(MAPK12)		Q96G46(DUS3L)	P54198(HIRA)	P82932(MRPS6)			P49247(RPIA)	P41250(GARS)						Q9Y232(CDYL)				P32238(CCKAR)		P46199(MTIF2)													P30048(PRDX3)							P54198(HIRA)			Q14739(LBR)	Q14739(LBR)	Q13185(CBX3)	Q13185(CBX3)
			P54198(HIRA)		Q96I44(STK40)	P54274(TERF1)	Q00403(GTF2B)			P49458(SRP9)	P41252(IARS)						Q9Y265(RUVBL1)				P33765(ADORA3)		P46777(RPL5)													P30405(PPIF)							P54274(TERF1)			Q14978(NOLC1)	Q14978(NOLC1)	Q13422(IKZF1)	Q13422(IKZF1)
			P54274(TERF1)		Q96RU7(TRIB3)	P54578(USP14)	Q00796(SORD)			P49736(MCM2)	P43320(CRYBB2)						Q9Y285(FARSA)				P36896(ACVR1B)		P46976(GYG1)													P30566(ADSL)							P54819(AK2)			Q15329(E2F5)	Q15329(E2F5)	Q13428(TCOF1)	Q13428(TCOF1)
			P54578(USP14)		Q96SB4(SRPK1)	P54819(AK2)	Q01081(U2AF1)			P49759(CLK1)	P46087(NOP2)						Q9Y295(DRG1)				P36957(DLST)		P47914(RPL29)													P31948(STIP1)							P55060(CSE1L)			Q15393(SF3B3)	Q15393(SF3B3)	Q13823(GNL2)	Q13823(GNL2)
			P54819(AK2)		Q99519(NEU1)	P55769(NHP2L1)	Q01469(FABP5)			P49914(MTHFS)	P46199(MTIF2)						Q9Y2S0(POLR1D)				P37108(SRP14)		P48643(CCT5)													P32238(CCKAR)							P55769(NHP2L1)			Q15561(TEAD4)	Q15561(TEAD4)	Q13867(BLMH)	Q13867(BLMH)
			P55058(PLTP)		Q99708(RBBP8)	P55809(OXCT1)	Q04837(SSBP1)			P50395(GDI2)	P46777(RPL5)						Q9Y2X3(NOP58)				P38646(HSPA9)		P48651(PTDSS1)													P33765(ADORA3)							P55809(OXCT1)			Q16342(PDCD2)	Q16342(PDCD2)	Q14103(HNRNPD)	Q14103(HNRNPD)
			P55769(NHP2L1)		Q99933(BAG1)	P56182(RRP1)	Q05923(DUSP2)			P50897(PPT1)	P46976(GYG1)						Q9Y333(LSM2)				P39687(ANP32A)		P48745(NOV)													P36896(ACVR1B)							P56182(RRP1)			Q16533(SNAPC1)	Q16533(SNAPC1)	Q14137(BOP1)	Q14137(BOP1)
			P55809(OXCT1)		Q9BPZ3()	P56211(ARPP-19)	Q06187(BTK)			P50990(CCT8)	P47914(RPL29)						Q9Y3A2(UTP11L)				P40306(PSMB10)		P49069(CAMLG)													P36957(DLST)							P56545(CTBP2)			Q16600(ZNF239)	Q16600(ZNF239)	Q14469(HES1)	Q14469(HES1)
			P56182(RRP1)		Q9BQ48(MRPL34)	P56545(CTBP2)	Q06455(RUNX1T1)			P51151(RAB9A)	P48643(CCT5)						Q9Y4Y9(LSM5)				P40937(RFC5)		P49247(RPIA)													P37108(SRP14)							P56589(PEX3)			Q16629(SFRS7)	Q16629(SFRS7)	Q14493(SLBP)	Q14493(SLBP)
			P56211(ARPP-19)		Q9BQ83(SULT1A3)	P78527(PRKDC)	Q12792(TWF1)			P51532(SMARCA4)	P48651(PTDSS1)						Q9Y5P8(PPP2R3B)				P41250(GARS)		P49407(ARRB1)													P38646(HSPA9)							P78527(PRKDC)			Q16678(CYP1B1)	Q16678(CYP1B1)	Q14566(MCM6)	Q14566(MCM6)
			P56545(CTBP2)		Q9BR09(NEURL2)	P82932(MRPS6)	Q12794(HYAL1)			P52434(POLR2H)	P48745(NOV)						Q9Y5R5(DMRT2)				P41252(IARS)		P49458(SRP9)													P40306(PSMB10)							P82932(MRPS6)			Q86V81(THOC4)	Q86V81(THOC4)	Q14573(ITPR3)	Q14573(ITPR3)
			P78527(PRKDC)		Q9BRJ2(MRPL45)	Q00403(GTF2B)	Q12849(GRSF1)			P52597(HNRNPF)	P49247(RPIA)										P43320(CRYBB2)		P49736(MCM2)													P40937(RFC5)							Q00403(GTF2B)			Q86Y39(NDUFA11)	Q86Y39(NDUFA11)	Q14739(LBR)	Q14739(LBR)
			P82932(MRPS6)		Q9BTZ2(DHRS4)	Q00796(SORD)	Q12931(TRAP1)			P53567(CEBPG)	P49407(ARRB1)										P43487(RANBP1)		P49759(CLK1)													P41250(GARS)							Q01081(U2AF1)			Q8IVH2(FOXP4)	Q8IVH2(FOXP4)	Q14978(NOLC1)	Q14978(NOLC1)
			Q00403(GTF2B)		Q9BWJ5(SF3B5)	Q01081(U2AF1)	Q12996(CSTF3)			P53582(METAP1)	P49458(SRP9)										P46087(NOP2)		P49914(MTHFS)													P41252(IARS)							Q01469(FABP5)			Q8N5P1(ZC3H8)	Q8N5P1(ZC3H8)	Q15329(E2F5)	Q15329(E2F5)
			Q00796(SORD)		Q9BYD2(MRPL9)	Q04837(SSBP1)	Q13133(NR1H3)			P53701(HCCS)	P49736(MCM2)										P46199(MTIF2)		P50395(GDI2)													P43320(CRYBB2)							Q04837(SSBP1)			Q8NB15(ZNF511)	Q8NB15(ZNF511)	Q15393(SF3B3)	Q15393(SF3B3)
			Q01081(U2AF1)		Q9C029(TRIM7)	Q05923(DUSP2)	Q13185(CBX3)			P53778(MAPK12)	P49759(CLK1)										P46777(RPL5)		P50897(PPT1)													P43487(RANBP1)							Q05923(DUSP2)			Q8NB50(ZFP62)	Q8NB50(ZFP62)	Q15561(TEAD4)	Q15561(TEAD4)
			Q01469(FABP5)		Q9H840(GEMIN7)	Q06187(BTK)	Q13422(IKZF1)			P53985(SLC16A1)	P49914(MTHFS)										P46976(GYG1)		P50990(CCT8)													P46087(NOP2)							Q06187(BTK)			Q8NC51(SERBP1)	Q8NC51(SERBP1)	Q16342(PDCD2)	Q16342(PDCD2)
			Q04837(SSBP1)		Q9HD33(MRPL47)	Q06455(RUNX1T1)	Q13470(TNK1)			P54105(CLNS1A)	P50395(GDI2)										P47914(RPL29)		P51151(RAB9A)													P46199(MTIF2)							Q06455(RUNX1T1)			Q8NC99(ZNF791)	Q8NC99(ZNF791)	Q16533(SNAPC1)	Q16533(SNAPC1)
			Q05923(DUSP2)		Q9NPA3(MID1IP1)	Q12792(TWF1)	Q13867(BLMH)			P54198(HIRA)	P50897(PPT1)										P48643(CCT5)		P51532(SMARCA4)													P46777(RPL5)							Q12792(TWF1)			Q8NES3(LFNG)	Q8NES3(LFNG)	Q16600(ZNF239)	Q16600(ZNF239)
			Q06187(BTK)		Q9NQZ2(UTP3)	Q12849(GRSF1)	Q14103(HNRNPD)			P54274(TERF1)	P50990(CCT8)										P48651(PTDSS1)		P52434(POLR2H)													P46976(GYG1)							Q12794(HYAL1)			Q8NEY8(PPHLN1)	Q8NEY8(PPHLN1)	Q16629(SFRS7)	Q16629(SFRS7)
			Q06455(RUNX1T1)		Q9NR45(NANS)	Q12931(TRAP1)	Q14137(BOP1)			P54578(USP14)	P51151(RAB9A)										P48745(NOV)		P52597(HNRNPF)													P47914(RPL29)							Q12849(GRSF1)			Q8NI60(CABC1)	Q8NI60(CABC1)	Q16678(CYP1B1)	Q16678(CYP1B1)
			Q12792(TWF1)		Q9NRN9(METTL5)	Q12996(CSTF3)	Q14145(KEAP1)			P54819(AK2)	P51532(SMARCA4)										P49069(CAMLG)		P53567(CEBPG)													P48643(CCT5)							Q12931(TRAP1)			Q8TAA5(GRPEL2)	Q8TAA5(GRPEL2)	Q86V81(THOC4)	Q86V81(THOC4)
			Q12794(HYAL1)		Q9NXB8(PXK)	Q13133(NR1H3)	Q14197(ICT1)			P55058(PLTP)	P52434(POLR2H)										P49247(RPIA)		P53582(METAP1)													P48651(PTDSS1)							Q12996(CSTF3)			Q92552(MRPS27)	Q92552(MRPS27)	Q86Y39(NDUFA11)	Q86Y39(NDUFA11)
			Q12849(GRSF1)		Q9NXP7(GIN1)	Q13185(CBX3)	Q14469(HES1)			P55060(CSE1L)	P52597(HNRNPF)										P49407(ARRB1)		P53701(HCCS)													P48745(NOV)							Q13133(NR1H3)			Q92597(NDRG1)	Q92597(NDRG1)	Q8IUN3(KIF26B)	Q8IUN3(KIF26B)
			Q12931(TRAP1)		Q9NY12(GAR1)	Q13422(IKZF1)	Q14493(SLBP)			P55769(NHP2L1)	P53567(CEBPG)										P49458(SRP9)		P53778(MAPK12)													P49247(RPIA)							Q13185(CBX3)			Q92665(MRPS31)	Q92665(MRPS31)	Q8IVH2(FOXP4)	Q8IVH2(FOXP4)
			Q12996(CSTF3)		Q9NYY3(PLK2)	Q13470(TNK1)	Q14566(MCM6)			P55809(OXCT1)	P53582(METAP1)										P49736(MCM2)		P53985(SLC16A1)													P49407(ARRB1)							Q13322(GRB10)			Q92989(CLP1)	Q92989(CLP1)	Q8N3F8(MICALL1)	Q8N3F8(MICALL1)
			Q13133(NR1H3)		Q9P0J6(MRPL36)	Q13867(BLMH)	Q14978(NOLC1)			P56182(RRP1)	P53701(HCCS)										P49759(CLK1)		P54105(CLNS1A)													P49458(SRP9)							Q13422(IKZF1)			Q96DA6(DNAJC19)	Q96DA6(DNAJC19)	Q8N5P1(ZC3H8)	Q8N5P1(ZC3H8)
			Q13185(CBX3)		Q9P0X2(HSPA14)	Q14103(HNRNPD)	Q15046(KARS)			P56211(ARPP-19)	P53778(MAPK12)										P49914(MTHFS)		P54198(HIRA)													P49736(MCM2)							Q13428(TCOF1)			Q96G21(IMP4)	Q96G21(IMP4)	Q8NB15(ZNF511)	Q8NB15(ZNF511)
			Q13422(IKZF1)		Q9P2J5(LARS)	Q14137(BOP1)	Q15056(EIF4H)			P56545(CTBP2)	P53985(SLC16A1)										P50395(GDI2)		P54274(TERF1)													P49759(CLK1)							Q13470(TNK1)			Q96HZ4(HES6)	Q96HZ4(HES6)	Q8NB50(ZFP62)	Q8NB50(ZFP62)
			Q13470(TNK1)		Q9UBF6(RNF7)	Q14145(KEAP1)	Q15329(E2F5)			P56589(PEX3)	P54105(CLNS1A)										P50897(PPT1)		P54578(USP14)													P49914(MTHFS)							Q13823(GNL2)			Q96RU7(TRIB3)	Q96RU7(TRIB3)	Q8NC51(SERBP1)	Q8NC51(SERBP1)
			Q13867(BLMH)		Q9UGM6(WARS2)	Q14197(ICT1)	Q15393(SF3B3)			P78504(JAG1)	P54198(HIRA)										P50990(CCT8)		P54819(AK2)													P50395(GDI2)							Q13867(BLMH)			Q96SB4(SRPK1)	Q96SB4(SRPK1)	Q8NC99(ZNF791)	Q8NC99(ZNF791)
			Q14103(HNRNPD)		Q9UHV9(PFDN2)	Q14469(HES1)	Q15561(TEAD4)			P78527(PRKDC)	P54274(TERF1)										P51151(RAB9A)		P55058(PLTP)													P50897(PPT1)							Q13895(BYSL)			Q99519(NEU1)	Q99519(NEU1)	Q8NES3(LFNG)	Q8NES3(LFNG)
			Q14137(BOP1)		Q9UI42(CPA4)	Q14493(SLBP)	Q15573(TAF1A)			P82932(MRPS6)	P54578(USP14)										P51532(SMARCA4)		P55060(CSE1L)													P50990(CCT8)							Q14103(HNRNPD)			Q99547(MPHOSPH6)	Q99547(MPHOSPH6)	Q8NEY8(PPHLN1)	Q8NEY8(PPHLN1)
			Q14145(KEAP1)		Q9UKF6(CPSF3)	Q14566(MCM6)	Q16533(SNAPC1)			Q00403(GTF2B)	P54819(AK2)										P52306(RAP1GDS1)		P55769(NHP2L1)													P51151(RAB9A)							Q14137(BOP1)			Q99708(RBBP8)	Q99708(RBBP8)	Q8NI60(CABC1)	Q8NI60(CABC1)
			Q14197(ICT1)		Q9UNQ2(DIMT1L)	Q14978(NOLC1)	Q16600(ZNF239)			Q00796(SORD)	P55058(PLTP)										P52434(POLR2H)		P55809(OXCT1)													P51532(SMARCA4)							Q14469(HES1)			Q99848(EBNA1BP2)	Q99848(EBNA1BP2)	Q8TAA5(GRPEL2)	Q8TAA5(GRPEL2)
			Q14469(HES1)		Q9UNX3(RPL26L1)	Q15046(KARS)	Q16629(SFRS7)			Q01081(U2AF1)	P55060(CSE1L)										P52597(HNRNPF)		P56182(RRP1)													P52306(RAP1GDS1)							Q14493(SLBP)			Q9BQ48(MRPL34)	Q9BQ48(MRPL34)	Q92552(MRPS27)	Q92552(MRPS27)
			Q14493(SLBP)		Q9Y232(CDYL)	Q15056(EIF4H)	Q7Z4W1(DCXR)			Q01469(FABP5)	P55769(NHP2L1)										P53567(CEBPG)		P56211(ARPP-19)													P52434(POLR2H)							Q14566(MCM6)			Q9BRJ2(MRPL45)	Q9BRJ2(MRPL45)	Q92597(NDRG1)	Q92597(NDRG1)
			Q14566(MCM6)		Q9Y265(RUVBL1)	Q15181(PPA1)	Q86V81(THOC4)			Q04837(SSBP1)	P55809(OXCT1)										P53582(METAP1)		P56545(CTBP2)													P52597(HNRNPF)							Q14573(ITPR3)			Q9BSA5(AEN)	Q9BSA5(AEN)	Q92665(MRPS31)	Q92665(MRPS31)
			Q14978(NOLC1)		Q9Y276(BCS1L)	Q15329(E2F5)	Q8IVH2(FOXP4)			Q05923(DUSP2)	P56182(RRP1)										P53701(HCCS)		P56589(PEX3)													P53567(CEBPG)							Q14739(LBR)			Q9BTZ2(DHRS4)	Q9BTZ2(DHRS4)	Q92989(CLP1)	Q92989(CLP1)
			Q15046(KARS)		Q9Y285(FARSA)	Q15393(SF3B3)	Q8NB50(ZFP62)			Q06187(BTK)	P56211(ARPP-19)										P53778(MAPK12)		P78504(JAG1)													P53582(METAP1)							Q14978(NOLC1)			Q9BU19(ZNF692)	Q9BU19(ZNF692)	Q96DA6(DNAJC19)	Q96DA6(DNAJC19)
			Q15056(EIF4H)		Q9Y2B2(PIGL)	Q15561(TEAD4)	Q8NC99(ZNF791)			Q06455(RUNX1T1)	P56545(CTBP2)										P53985(SLC16A1)		P78527(PRKDC)													P53701(HCCS)							Q15046(KARS)			Q9BV35(SLC25A23)	Q9BV35(SLC25A23)	Q96G21(IMP4)	Q96G21(IMP4)
			Q15181(PPA1)		Q9Y2R5(MRPS17)	Q15573(TAF1A)	Q8NI60(CABC1)			Q12792(TWF1)	P56589(PEX3)										P54105(CLNS1A)		P82932(MRPS6)													P53778(MAPK12)							Q15056(EIF4H)			Q9BVJ6(UTP14A)	Q9BVJ6(UTP14A)	Q96HZ4(HES6)	Q96HZ4(HES6)
			Q15329(E2F5)		Q9Y2X3(NOP58)	Q16533(SNAPC1)	Q8TAA5(GRPEL2)			Q12849(GRSF1)	P78504(JAG1)										P54198(HIRA)		Q00403(GTF2B)													P53985(SLC16A1)							Q15181(PPA1)			Q9BWG4(SSBP4)	Q9BWG4(SSBP4)	Q96RU7(TRIB3)	Q96RU7(TRIB3)
			Q15393(SF3B3)		Q9Y333(LSM2)	Q16600(ZNF239)	Q8TEK0(PHF15)			Q12894(IFRD2)	P78527(PRKDC)										P54274(TERF1)		Q00796(SORD)													P54105(CLNS1A)							Q15329(E2F5)			Q9BWJ5(SF3B5)	Q9BWJ5(SF3B5)	Q96SB4(SRPK1)	Q96SB4(SRPK1)
			Q15561(TEAD4)		Q9Y3A2(UTP11L)	Q16629(SFRS7)	Q8WUJ0(STYX)			Q12931(TRAP1)	P82932(MRPS6)										P54578(USP14)		Q01081(U2AF1)													P54198(HIRA)							Q15393(SF3B3)			Q9BXH1(BBC3)	Q9BXH1(BBC3)	Q99519(NEU1)	Q99519(NEU1)
			Q15573(TAF1A)		Q9Y3D3(MRPS16)	Q16678(CYP1B1)	Q8WVM0(TFB1M)			Q12996(CSTF3)	Q00403(GTF2B)										P54819(AK2)		Q01469(FABP5)													P54274(TERF1)							Q15561(TEAD4)			Q9BY08(EBPL)	Q9BY08(EBPL)	Q99547(MPHOSPH6)	Q99547(MPHOSPH6)
			Q16533(SNAPC1)		Q9Y4Y9(LSM5)	Q7Z4W1(DCXR)	Q8WZA4(COLEC12)			Q13133(NR1H3)	Q00796(SORD)										P55058(PLTP)		Q04837(SSBP1)													P54578(USP14)							Q16342(PDCD2)			Q9BYC8(MRPL32)	Q9BYC8(MRPL32)	Q99708(RBBP8)	Q99708(RBBP8)
			Q16600(ZNF239)		Q9Y5P8(PPP2R3B)	Q86V81(THOC4)	Q92499(DDX1)			Q13185(CBX3)	Q01081(U2AF1)										P55060(CSE1L)		Q05923(DUSP2)													P54819(AK2)							Q16533(SNAPC1)			Q9BYD2(MRPL9)	Q9BYD2(MRPL9)	Q99848(EBNA1BP2)	Q99848(EBNA1BP2)
			Q16629(SFRS7)		Q9Y5T5(USP16)	Q8IVH2(FOXP4)	Q92989(CLP1)			Q13422(IKZF1)	Q01469(FABP5)										P55769(NHP2L1)		Q06187(BTK)													P55058(PLTP)							Q16600(ZNF239)			Q9BYN8(MRPS26)	Q9BYN8(MRPS26)	Q9BQ48(MRPL34)	Q9BQ48(MRPL34)
			Q16678(CYP1B1)		Q9Y673(ALG5)	Q8NB50(ZFP62)	Q96BP3(PPWD1)			Q13428(TCOF1)	Q04837(SSBP1)										P55809(OXCT1)		Q06455(RUNX1T1)													P55060(CSE1L)							Q16629(SFRS7)			Q9C0J9(BHLHE41)	Q9C0J9(BHLHE41)	Q9BRJ2(MRPL45)	Q9BRJ2(MRPL45)
			Q7Z4W1(DCXR)		Q9Y6G3(MRPL42)	Q8NC99(ZNF791)	Q96DA6(DNAJC19)			Q13470(TNK1)	Q05923(DUSP2)										P56182(RRP1)		Q12792(TWF1)													P55769(NHP2L1)							Q16678(CYP1B1)			Q9GZL7(WDR12)	Q9GZL7(WDR12)	Q9BSA5(AEN)	Q9BSA5(AEN)
			Q86V81(THOC4)		Q9Y6I4(USP3)	Q8NI60(CABC1)	Q96F76(RNMTL1)			Q13685(AAMP)	Q06187(BTK)										P56211(ARPP-19)		Q12849(GRSF1)													P55809(OXCT1)							Q86V81(THOC4)			Q9H0P0(NT5C3)	Q9H0P0(NT5C3)	Q9BTZ2(DHRS4)	Q9BTZ2(DHRS4)
			Q8IVH2(FOXP4)			Q8TAA5(GRPEL2)	Q96G21(IMP4)			Q13823(GNL2)	Q06455(RUNX1T1)										P56545(CTBP2)		Q12894(IFRD2)													P56182(RRP1)							Q86Y39(NDUFA11)			Q9H4Q4(PRDM12)	Q9H4Q4(PRDM12)	Q9BU19(ZNF692)	Q9BU19(ZNF692)
			Q8NB50(ZFP62)			Q8TEK0(PHF15)	Q96G46(DUS3L)			Q13867(BLMH)	Q12792(TWF1)										P56589(PEX3)		Q12931(TRAP1)													P56211(ARPP-19)							Q8IUN3(KIF26B)			Q9H7B2(BXDC1)	Q9H7B2(BXDC1)	Q9BV35(SLC25A23)	Q9BV35(SLC25A23)
			Q8NBN7(RDH13)			Q8WUJ0(STYX)	Q96HZ4(HES6)			Q14103(HNRNPD)	Q12794(HYAL1)										P78504(JAG1)		Q12996(CSTF3)													P56545(CTBP2)							Q8IVH2(FOXP4)			Q9H840(GEMIN7)	Q9H840(GEMIN7)	Q9BVJ6(UTP14A)	Q9BVJ6(UTP14A)
			Q8NC99(ZNF791)			Q8WVM0(TFB1M)	Q96I44(STK40)			Q14137(BOP1)	Q12849(GRSF1)										P78527(PRKDC)		Q13123(IK)													P56589(PEX3)							Q8N3F8(MICALL1)			Q9H936(SLC25A22)	Q9H936(SLC25A22)	Q9BWG4(SSBP4)	Q9BWG4(SSBP4)
			Q8NI60(CABC1)			Q8WZA4(COLEC12)	Q96RU7(TRIB3)			Q14145(KEAP1)	Q12894(IFRD2)										P82932(MRPS6)		Q13133(NR1H3)													P57088(TMEM33)							Q8N5P1(ZC3H8)			Q9HC21(SLC25A19)	Q9HC21(SLC25A19)	Q9BWJ5(SF3B5)	Q9BWJ5(SF3B5)
			Q8TAA5(GRPEL2)			Q92499(DDX1)	Q96SB4(SRPK1)			Q14197(ICT1)	Q12931(TRAP1)										Q00403(GTF2B)		Q13185(CBX3)													P78504(JAG1)							Q8NB15(ZNF511)			Q9HD33(MRPL47)	Q9HD33(MRPL47)	Q9BXH1(BBC3)	Q9BXH1(BBC3)
			Q8TEK0(PHF15)			Q92989(CLP1)	Q99519(NEU1)			Q14469(HES1)	Q12996(CSTF3)										Q00796(SORD)		Q13322(GRB10)													P78527(PRKDC)							Q8NB50(ZFP62)			Q9NPA3(MID1IP1)	Q9NPA3(MID1IP1)	Q9BY08(EBPL)	Q9BY08(EBPL)
			Q8WUJ0(STYX)			Q96BP3(PPWD1)	Q99708(RBBP8)			Q14493(SLBP)	Q13123(IK)										Q01081(U2AF1)		Q13422(IKZF1)													P82932(MRPS6)							Q8NC51(SERBP1)			Q9NQ50(MRPL40)	Q9NQ50(MRPL40)	Q9BYC8(MRPL32)	Q9BYC8(MRPL32)
			Q8WVM0(TFB1M)			Q96DA6(DNAJC19)	Q99933(BAG1)			Q14566(MCM6)	Q13133(NR1H3)										Q01469(FABP5)		Q13428(TCOF1)													Q00403(GTF2B)							Q8NC99(ZNF791)			Q9NQV6(PRDM10)	Q9NQV6(PRDM10)	Q9BYD2(MRPL9)	Q9BYD2(MRPL9)
			Q8WZA4(COLEC12)			Q96F76(RNMTL1)	Q9BPZ3()			Q14573(ITPR3)	Q13185(CBX3)										Q04837(SSBP1)		Q13470(TNK1)													Q00796(SORD)							Q8NES3(LFNG)			Q9NQZ2(UTP3)	Q9NQZ2(UTP3)	Q9BYN8(MRPS26)	Q9BYN8(MRPS26)
			Q92499(DDX1)			Q96G21(IMP4)	Q9BQ48(MRPL34)			Q14978(NOLC1)	Q13422(IKZF1)										Q05923(DUSP2)		Q13685(AAMP)													Q01081(U2AF1)							Q8NEY8(PPHLN1)			Q9NR55(BATF3)	Q9NR55(BATF3)	Q9C0J9(BHLHE41)	Q9C0J9(BHLHE41)
			Q92989(CLP1)			Q96G46(DUS3L)	Q9BQ83(SULT1A3)			Q15043(SLC39A14)	Q13428(TCOF1)										Q06187(BTK)		Q13823(GNL2)													Q01469(FABP5)							Q8NI60(CABC1)			Q9NRN9(METTL5)	Q9NRN9(METTL5)	Q9GZL7(WDR12)	Q9GZL7(WDR12)
			Q96BP3(PPWD1)			Q96HZ4(HES6)	Q9BR09(NEURL2)			Q15046(KARS)	Q13470(TNK1)										Q06455(RUNX1T1)		Q13867(BLMH)													Q04837(SSBP1)							Q8TAA5(GRPEL2)			Q9NY12(GAR1)	Q9NY12(GAR1)	Q9H0P0(NT5C3)	Q9H0P0(NT5C3)
			Q96DA6(DNAJC19)			Q96I44(STK40)	Q9BRJ2(MRPL45)			Q15056(EIF4H)	Q13685(AAMP)										Q12792(TWF1)		Q13895(BYSL)													Q05923(DUSP2)							Q8WZA4(COLEC12)			Q9NY61(AATF)	Q9NY61(AATF)	Q9H4Q4(PRDM12)	Q9H4Q4(PRDM12)
			Q96F76(RNMTL1)			Q96RU7(TRIB3)	Q9BTZ2(DHRS4)			Q15181(PPA1)	Q13823(GNL2)										Q12794(HYAL1)		Q14103(HNRNPD)													Q06187(BTK)							Q92552(MRPS27)			Q9P0J6(MRPL36)	Q9P0J6(MRPL36)	Q9H7B2(BXDC1)	Q9H7B2(BXDC1)
			Q96G21(IMP4)			Q96SB4(SRPK1)	Q9BWJ5(SF3B5)			Q15329(E2F5)	Q13867(BLMH)										Q12849(GRSF1)		Q14137(BOP1)													Q06455(RUNX1T1)							Q92597(NDRG1)			Q9P288(BCCIP)	Q9P288(BCCIP)	Q9H840(GEMIN7)	Q9H840(GEMIN7)
			Q96G46(DUS3L)			Q99708(RBBP8)	Q9BXW6(OSBPL1A)			Q15393(SF3B3)	Q13895(BYSL)										Q12894(IFRD2)		Q14145(KEAP1)													Q12792(TWF1)							Q92665(MRPS31)			Q9UBF6(RNF7)	Q9UBF6(RNF7)	Q9H936(SLC25A22)	Q9H936(SLC25A22)
			Q96HZ4(HES6)			Q99933(BAG1)	Q9BY08(EBPL)			Q15561(TEAD4)	Q14103(HNRNPD)										Q12931(TRAP1)		Q14197(ICT1)													Q12794(HYAL1)							Q92989(CLP1)			Q9UFF9(CNOT8)	Q9UFF9(CNOT8)	Q9HAQ2(KIF9)	Q9HAQ2(KIF9)
			Q96I44(STK40)			Q9BPZ3()	Q9BYD2(MRPL9)			Q15573(TAF1A)	Q14137(BOP1)										Q12996(CSTF3)		Q14469(HES1)													Q12849(GRSF1)							Q96A55(VPS26B)			Q9UGM6(WARS2)	Q9UGM6(WARS2)	Q9HC21(SLC25A19)	Q9HC21(SLC25A19)
			Q96RU7(TRIB3)			Q9BQ48(MRPL34)	Q9BZF3(OSBPL6)			Q16342(PDCD2)	Q14145(KEAP1)										Q13123(IK)		Q14493(SLBP)													Q12894(IFRD2)							Q96DA6(DNAJC19)			Q9UKD2(MRTO4)	Q9UKD2(MRTO4)	Q9HD33(MRPL47)	Q9HD33(MRPL47)
			Q96SB4(SRPK1)			Q9BQ83(SULT1A3)	Q9C029(TRIM7)			Q16533(SNAPC1)	Q14197(ICT1)										Q13133(NR1H3)		Q14566(MCM6)													Q12931(TRAP1)							Q96G21(IMP4)			Q9UKF6(CPSF3)	Q9UKF6(CPSF3)	Q9NPA3(MID1IP1)	Q9NPA3(MID1IP1)
			Q99519(NEU1)			Q9BR09(NEURL2)	Q9C0J9(BHLHE41)			Q16589(CCNG2)	Q14469(HES1)										Q13185(CBX3)		Q14573(ITPR3)													Q12996(CSTF3)							Q96G61(NUDT11)			Q9UNK0(STX8)	Q9UNK0(STX8)	Q9NQ50(MRPL40)	Q9NQ50(MRPL40)
			Q99708(RBBP8)			Q9BRJ2(MRPL45)	Q9H0P0(NT5C3)			Q16600(ZNF239)	Q14493(SLBP)										Q13322(GRB10)		Q14978(NOLC1)													Q13123(IK)							Q96HZ4(HES6)			Q9UNQ2(DIMT1L)	Q9UNQ2(DIMT1L)	Q9NQV6(PRDM10)	Q9NQV6(PRDM10)
			Q99933(BAG1)			Q9BV20(MRI1)	Q9H4Q4(PRDM12)			Q16629(SFRS7)	Q14566(MCM6)										Q13422(IKZF1)		Q15043(SLC39A14)													Q13133(NR1H3)							Q96RL7(VPS13A)			Q9Y232(CDYL)	Q9Y232(CDYL)	Q9NQZ2(UTP3)	Q9NQZ2(UTP3)
			Q9BPZ3()			Q9BWJ5(SF3B5)	Q9H840(GEMIN7)			Q16678(CYP1B1)	Q14573(ITPR3)										Q13428(TCOF1)		Q15046(KARS)													Q13185(CBX3)							Q96RU7(TRIB3)			Q9Y265(RUVBL1)	Q9Y265(RUVBL1)	Q9NR55(BATF3)	Q9NR55(BATF3)
			Q9BQ48(MRPL34)			Q9BXW6(OSBPL1A)	Q9HD33(MRPL47)			Q7Z4W1(DCXR)	Q14978(NOLC1)										Q13470(TNK1)		Q15056(EIF4H)													Q13322(GRB10)							Q96SB4(SRPK1)			Q9Y276(BCS1L)	Q9Y276(BCS1L)	Q9NRN9(METTL5)	Q9NRN9(METTL5)
			Q9BQ83(SULT1A3)			Q9BY08(EBPL)	Q9NPA3(MID1IP1)			Q86UC7(SLC5A12)	Q15043(SLC39A14)										Q13685(AAMP)		Q15181(PPA1)													Q13422(IKZF1)							Q99519(NEU1)			Q9Y2B2(PIGL)	Q9Y2B2(PIGL)	Q9NY12(GAR1)	Q9NY12(GAR1)
			Q9BR09(NEURL2)			Q9BYD2(MRPL9)	Q9NQV6(PRDM10)			Q86V81(THOC4)	Q15046(KARS)										Q13823(GNL2)		Q15329(E2F5)													Q13428(TCOF1)							Q99547(MPHOSPH6)			Q9Y2Q9(MRPS28)	Q9Y2Q9(MRPS28)	Q9NY61(AATF)	Q9NY61(AATF)
			Q9BRJ2(MRPL45)			Q9BZF3(OSBPL6)	Q9NQZ2(UTP3)			Q86Y55(SLC5A11)	Q15056(EIF4H)										Q13867(BLMH)		Q15393(SF3B3)													Q13470(TNK1)							Q99708(RBBP8)			Q9Y2R5(MRPS17)	Q9Y2R5(MRPS17)	Q9P0J6(MRPL36)	Q9P0J6(MRPL36)
			Q9BTZ2(DHRS4)			Q9C029(TRIM7)	Q9NR45(NANS)			Q8IUN3(KIF26B)	Q15181(PPA1)										Q13895(BYSL)		Q15561(TEAD4)													Q13685(AAMP)							Q99848(EBNA1BP2)			Q9Y2S0(POLR1D)	Q9Y2S0(POLR1D)	Q9P288(BCCIP)	Q9P288(BCCIP)
			Q9BV20(MRI1)			Q9C0J9(BHLHE41)	Q9NR55(BATF3)			Q8IVH2(FOXP4)	Q15329(E2F5)										Q14103(HNRNPD)		Q15573(TAF1A)													Q13823(GNL2)							Q99933(BAG1)			Q9Y2X3(NOP58)	Q9Y2X3(NOP58)	Q9UBF6(RNF7)	Q9UBF6(RNF7)
			Q9BWJ5(SF3B5)			Q9H0P0(NT5C3)	Q9NRN9(METTL5)			Q8NB50(ZFP62)	Q15393(SF3B3)										Q14137(BOP1)		Q16342(PDCD2)													Q13867(BLMH)							Q9BPZ3()			Q9Y333(LSM2)	Q9Y333(LSM2)	Q9UFF9(CNOT8)	Q9UFF9(CNOT8)
			Q9BXW6(OSBPL1A)			Q9H4Q4(PRDM12)	Q9NWU1(OXSM)			Q8NC99(ZNF791)	Q15561(TEAD4)										Q14145(KEAP1)		Q16533(SNAPC1)													Q13895(BYSL)							Q9BQ48(MRPL34)			Q9Y3A2(UTP11L)	Q9Y3A2(UTP11L)	Q9UGM6(WARS2)	Q9UGM6(WARS2)
			Q9BY08(EBPL)			Q9H840(GEMIN7)	Q9NXB8(PXK)			Q8NDM4(TBRG4)	Q15573(TAF1A)										Q14197(ICT1)		Q16589(CCNG2)													Q14103(HNRNPD)							Q9BQ83(SULT1A3)			Q9Y3D3(MRPS16)	Q9Y3D3(MRPS16)	Q9UKD2(MRTO4)	Q9UKD2(MRTO4)
			Q9BYD2(MRPL9)			Q9HD33(MRPL47)	Q9NXP7(GIN1)			Q8NI60(CABC1)	Q16342(PDCD2)										Q14469(HES1)		Q16600(ZNF239)													Q14145(KEAP1)							Q9BRJ2(MRPL45)			Q9Y3D9(MRPS23)	Q9Y3D9(MRPS23)	Q9UKF6(CPSF3)	Q9UKF6(CPSF3)
			Q9BZF3(OSBPL6)			Q9NPA3(MID1IP1)	Q9NY12(GAR1)			Q8TAA5(GRPEL2)	Q16533(SNAPC1)										Q14493(SLBP)		Q16629(SFRS7)													Q14197(ICT1)							Q9BRP1(PDCD2L)			Q9Y3E5(PTRH2)	Q9Y3E5(PTRH2)	Q9UNK0(STX8)	Q9UNK0(STX8)
			Q9BZX2(UCK2)			Q9NQV6(PRDM10)	Q9NYA1(SPHK1)			Q8TEK0(PHF15)	Q16589(CCNG2)										Q14566(MCM6)		Q16678(CYP1B1)													Q14469(HES1)							Q9BSA5(AEN)			Q9Y3S2(ZNF330)	Q9Y3S2(ZNF330)	Q9UNQ2(DIMT1L)	Q9UNQ2(DIMT1L)
			Q9C029(TRIM7)			Q9NQZ2(UTP3)	Q9NYY3(PLK2)			Q8WUJ0(STYX)	Q16600(ZNF239)										Q14573(ITPR3)		Q7Z4W1(DCXR)													Q14493(SLBP)							Q9BTZ2(DHRS4)			Q9Y4Y9(LSM5)	Q9Y4Y9(LSM5)	Q9UNX3(RPL26L1)	Q9UNX3(RPL26L1)
			Q9C0J9(BHLHE41)			Q9NR45(NANS)	Q9P0J6(MRPL36)			Q8WVM0(TFB1M)	Q16629(SFRS7)										Q14657(LAGE3)		Q86UC7(SLC5A12)													Q14566(MCM6)							Q9BU19(ZNF692)			Q9Y5L4(TIMM13)	Q9Y5L4(TIMM13)	Q9Y232(CDYL)	Q9Y232(CDYL)
			Q9H0P0(NT5C3)			Q9NR55(BATF3)	Q9P0X2(HSPA14)			Q8WZA4(COLEC12)	Q16678(CYP1B1)										Q14978(NOLC1)		Q86V81(THOC4)													Q14573(ITPR3)							Q9BV35(SLC25A23)			Q9Y5P8(PPP2R3B)	Q9Y5P8(PPP2R3B)	Q9Y265(RUVBL1)	Q9Y265(RUVBL1)
			Q9H4Q4(PRDM12)			Q9NRN9(METTL5)	Q9P2J5(LARS)			Q92499(DDX1)	Q7Z4W1(DCXR)										Q15043(SLC39A14)		Q86Y55(SLC5A11)													Q14657(LAGE3)							Q9BVJ6(UTP14A)			Q9Y5R5(DMRT2)	Q9Y5R5(DMRT2)	Q9Y276(BCS1L)	Q9Y276(BCS1L)
			Q9H840(GEMIN7)			Q9NWU1(OXSM)	Q9UBF6(RNF7)			Q92737(RASL10A)	Q86UC7(SLC5A12)										Q15046(KARS)		Q8IUN3(KIF26B)													Q14739(LBR)							Q9BWG4(SSBP4)			Q9Y673(ALG5)	Q9Y673(ALG5)	Q9Y2B2(PIGL)	Q9Y2B2(PIGL)
			Q9HBH5(RDH14)			Q9NXB8(PXK)	Q9UBL6(CPNE7)			Q92963(RIT1)	Q86V81(THOC4)										Q15056(EIF4H)		Q8IVH2(FOXP4)													Q14978(NOLC1)							Q9BWJ5(SF3B5)			Q9Y6G3(MRPL42)	Q9Y6G3(MRPL42)	Q9Y2Q9(MRPS28)	Q9Y2Q9(MRPS28)
			Q9HD33(MRPL47)			Q9NXP7(GIN1)	Q9UFF9(CNOT8)			Q92989(CLP1)	Q86Y55(SLC5A11)										Q15181(PPA1)		Q8NB50(ZFP62)													Q15032(R3HDM1)							Q9BXH1(BBC3)					Q9Y2R5(MRPS17)	Q9Y2R5(MRPS17)
			Q9NPA3(MID1IP1)			Q9NY12(GAR1)	Q9UGM6(WARS2)			Q96A55(VPS26B)	Q8IUN3(KIF26B)										Q15329(E2F5)		Q8NC99(ZNF791)													Q15043(SLC39A14)							Q9BXI9(C1QTNF6)					Q9Y2S0(POLR1D)	Q9Y2S0(POLR1D)
			Q9NQV6(PRDM10)			Q9NYA1(SPHK1)	Q9UHV9(PFDN2)			Q96BD0(SLCO4A1)	Q8IVH2(FOXP4)										Q15393(SF3B3)		Q8NDM4(TBRG4)													Q15046(KARS)							Q9BXW6(OSBPL1A)					Q9Y2X3(NOP58)	Q9Y2X3(NOP58)
			Q9NQZ2(UTP3)			Q9NYY3(PLK2)	Q9UI42(CPA4)			Q96BP3(PPWD1)	Q8NB50(ZFP62)										Q15527(SURF2)		Q8NEY8(PPHLN1)													Q15056(EIF4H)							Q9BY08(EBPL)					Q9Y333(LSM2)	Q9Y333(LSM2)
			Q9NR45(NANS)			Q9P0J6(MRPL36)	Q9UJA2(CRLS1)			Q96DA6(DNAJC19)	Q8NBN7(RDH13)										Q15561(TEAD4)		Q8NI60(CABC1)													Q15181(PPA1)							Q9BYC8(MRPL32)					Q9Y3A2(UTP11L)	Q9Y3A2(UTP11L)
			Q9NR55(BATF3)			Q9P0X2(HSPA14)	Q9UKF6(CPSF3)			Q96EE3(SEH1L)	Q8NC99(ZNF791)										Q15573(TAF1A)		Q8TAA5(GRPEL2)													Q15329(E2F5)							Q9BYD2(MRPL9)					Q9Y3D3(MRPS16)	Q9Y3D3(MRPS16)
			Q9NRN9(METTL5)			Q9P2J5(LARS)	Q9UNQ2(DIMT1L)			Q96F76(RNMTL1)	Q8NDM4(TBRG4)										Q15654(TRIP6)		Q8TEK0(PHF15)													Q15393(SF3B3)							Q9BYN8(MRPS26)					Q9Y3D9(MRPS23)	Q9Y3D9(MRPS23)
			Q9NWU1(OXSM)			Q9UBF6(RNF7)	Q9UNX3(RPL26L1)			Q96G21(IMP4)	Q8NI60(CABC1)										Q15834(CCDC85B)		Q8WUJ0(STYX)													Q15527(SURF2)							Q9C029(TRIM7)					Q9Y3E5(PTRH2)	Q9Y3E5(PTRH2)
			Q9NXB8(PXK)			Q9UFF9(CNOT8)	Q9Y232(CDYL)			Q96G46(DUS3L)	Q8TAA5(GRPEL2)										Q16226(TXNIP)		Q8WVM0(TFB1M)													Q15561(TEAD4)							Q9C0J9(BHLHE41)					Q9Y3S2(ZNF330)	Q9Y3S2(ZNF330)
			Q9NXP7(GIN1)			Q9UGM6(WARS2)	Q9Y265(RUVBL1)			Q96G61(NUDT11)	Q8TEK0(PHF15)										Q16342(PDCD2)		Q8WZA4(COLEC12)													Q15573(TAF1A)							Q9GZL7(WDR12)					Q9Y4Y9(LSM5)	Q9Y4Y9(LSM5)
			Q9NY12(GAR1)			Q9UHV9(PFDN2)	Q9Y276(BCS1L)			Q96HZ4(HES6)	Q8WUJ0(STYX)										Q16533(SNAPC1)		Q92499(DDX1)													Q15654(TRIP6)							Q9H0P0(NT5C3)					Q9Y5L4(TIMM13)	Q9Y5L4(TIMM13)
			Q9NYA1(SPHK1)			Q9UI42(CPA4)	Q9Y285(FARSA)			Q96I44(STK40)	Q8WVM0(TFB1M)										Q16589(CCNG2)		Q92597(NDRG1)													Q15834(CCDC85B)							Q9H4Q4(PRDM12)					Q9Y5P8(PPP2R3B)	Q9Y5P8(PPP2R3B)
			Q9NYY3(PLK2)			Q9UJA2(CRLS1)	Q9Y295(DRG1)			Q96RL7(VPS13A)	Q8WZA4(COLEC12)										Q16600(ZNF239)		Q92737(RASL10A)													Q16226(TXNIP)							Q9H7B2(BXDC1)					Q9Y5R5(DMRT2)	Q9Y5R5(DMRT2)
			Q9P0J6(MRPL36)			Q9UKF6(CPSF3)	Q9Y2B2(PIGL)			Q96RU7(TRIB3)	Q92499(DDX1)										Q16629(SFRS7)		Q92963(RIT1)													Q16342(PDCD2)							Q9H840(GEMIN7)					Q9Y673(ALG5)	Q9Y673(ALG5)
			Q9P0X2(HSPA14)			Q9UNQ2(DIMT1L)	Q9Y2R5(MRPS17)			Q96SB4(SRPK1)	Q92737(RASL10A)										Q16678(CYP1B1)		Q92989(CLP1)													Q16533(SNAPC1)							Q9H936(SLC25A22)					Q9Y6G3(MRPL42)	Q9Y6G3(MRPL42)
			Q9P2J5(LARS)			Q9UNX3(RPL26L1)	Q9Y2S0(POLR1D)			Q99547(MPHOSPH6)	Q92963(RIT1)										Q7Z4W1(DCXR)		Q96A55(VPS26B)													Q16600(ZNF239)							Q9HAQ2(KIF9)
			Q9UBF6(RNF7)			Q9Y232(CDYL)	Q9Y2X3(NOP58)			Q99689(FEZ1)	Q92989(CLP1)										Q86UC7(SLC5A12)		Q96BD0(SLCO4A1)													Q16629(SFRS7)							Q9HC21(SLC25A19)
			Q9UBL6(CPNE7)			Q9Y265(RUVBL1)	Q9Y333(LSM2)			Q99708(RBBP8)	Q96A55(VPS26B)										Q86V81(THOC4)		Q96BP3(PPWD1)													Q16678(CYP1B1)							Q9HD33(MRPL47)
			Q9UFF9(CNOT8)			Q9Y276(BCS1L)	Q9Y3A2(UTP11L)			Q99848(EBNA1BP2)	Q96BD0(SLCO4A1)										Q86Y55(SLC5A11)		Q96DA6(DNAJC19)													Q7Z4W1(DCXR)							Q9NPA3(MID1IP1)
			Q9UGM6(WARS2)			Q9Y285(FARSA)	Q9Y3D3(MRPS16)			Q99933(BAG1)	Q96BP3(PPWD1)										Q8IUN3(KIF26B)		Q96EE3(SEH1L)													Q86UC7(SLC5A12)							Q9NQ50(MRPL40)
			Q9UHV9(PFDN2)			Q9Y295(DRG1)	Q9Y4Y9(LSM5)			Q9BPZ3()	Q96DA6(DNAJC19)										Q8IVH2(FOXP4)		Q96F76(RNMTL1)													Q86V81(THOC4)							Q9NQV6(PRDM10)
			Q9UHY7(ENOPH1)			Q9Y2B2(PIGL)	Q9Y5P8(PPP2R3B)			Q9BQ48(MRPL34)	Q96EE3(SEH1L)										Q8NB50(ZFP62)		Q96G21(IMP4)													Q86Y39(NDUFA11)							Q9NQZ2(UTP3)
			Q9UI42(CPA4)			Q9Y2R5(MRPS17)	Q9Y5R5(DMRT2)			Q9BQ83(SULT1A3)	Q96F76(RNMTL1)										Q8NBN7(RDH13)		Q96G46(DUS3L)													Q86Y55(SLC5A11)							Q9NR45(NANS)
			Q9UJA2(CRLS1)			Q9Y2S0(POLR1D)	Q9Y5T5(USP16)			Q9BR09(NEURL2)	Q96G21(IMP4)										Q8NC99(ZNF791)		Q96G61(NUDT11)													Q8IUN3(KIF26B)							Q9NR55(BATF3)
			Q9UKF6(CPSF3)			Q9Y2X3(NOP58)	Q9Y617(PSAT1)			Q9BRJ2(MRPL45)	Q96G46(DUS3L)										Q8NDM4(TBRG4)		Q96HZ4(HES6)													Q8IVH2(FOXP4)							Q9NRN9(METTL5)
			Q9UNQ2(DIMT1L)			Q9Y333(LSM2)	Q9Y673(ALG5)			Q9BRP1(PDCD2L)	Q96G61(NUDT11)										Q8NES3(LFNG)		Q96I44(STK40)													Q8N2F4(CADM1)							Q9NY12(GAR1)
			Q9UNX3(RPL26L1)			Q9Y3A2(UTP11L)	Q9Y6G3(MRPL42)			Q9BV20(MRI1)	Q96HZ4(HES6)										Q8NEY8(PPHLN1)		Q96RL7(VPS13A)													Q8N3F8(MICALL1)							Q9NY61(AATF)
			Q9Y232(CDYL)			Q9Y3D3(MRPS16)	Q9Y6I4(USP3)			Q9BV35(SLC25A23)	Q96I44(STK40)										Q8NI60(CABC1)		Q96RU7(TRIB3)													Q8N5N7(MRPL50)							Q9NYA1(SPHK1)
			Q9Y265(RUVBL1)			Q9Y4Y9(LSM5)				Q9BVJ6(UTP14A)	Q96RL7(VPS13A)										Q8TAA5(GRPEL2)		Q96SB4(SRPK1)													Q8N5P1(ZC3H8)							Q9P0J6(MRPL36)
			Q9Y276(BCS1L)			Q9Y5P8(PPP2R3B)				Q9BWJ5(SF3B5)	Q96RU7(TRIB3)										Q8TEK0(PHF15)		Q99547(MPHOSPH6)													Q8NB15(ZNF511)							Q9P288(BCCIP)
			Q9Y285(FARSA)			Q9Y5R5(DMRT2)				Q9BXH1(BBC3)	Q96SB4(SRPK1)										Q8WUJ0(STYX)		Q99689(FEZ1)													Q8NB50(ZFP62)							Q9P2J5(LARS)
			Q9Y295(DRG1)			Q9Y5T5(USP16)				Q9BXI9(C1QTNF6)	Q99519(NEU1)										Q8WVM0(TFB1M)		Q99708(RBBP8)													Q8NBN7(RDH13)							Q9UBF6(RNF7)
			Q9Y2B2(PIGL)			Q9Y617(PSAT1)				Q9BXW6(OSBPL1A)	Q99547(MPHOSPH6)										Q8WZA4(COLEC12)		Q99848(EBNA1BP2)													Q8NBU5(ATAD1)							Q9UFF9(CNOT8)
			Q9Y2R5(MRPS17)			Q9Y673(ALG5)				Q9BY08(EBPL)	Q99689(FEZ1)										Q92499(DDX1)		Q99933(BAG1)													Q8NC51(SERBP1)							Q9UGM6(WARS2)
			Q9Y2S0(POLR1D)			Q9Y6G3(MRPL42)				Q9BYD2(MRPL9)	Q99708(RBBP8)										Q92597(NDRG1)		Q9BPZ3()													Q8NC99(ZNF791)							Q9UHV9(PFDN2)
			Q9Y2X3(NOP58)			Q9Y6I4(USP3)				Q9BZF3(OSBPL6)	Q99848(EBNA1BP2)										Q92737(RASL10A)		Q9BQ48(MRPL34)													Q8NDM4(TBRG4)							Q9UKD2(MRTO4)
			Q9Y333(LSM2)							Q9BZR6(RTN4R)	Q99933(BAG1)										Q92963(RIT1)		Q9BQ83(SULT1A3)													Q8NES3(LFNG)							Q9UKF6(CPSF3)
			Q9Y3A2(UTP11L)							Q9C029(TRIM7)	Q9BPZ3()										Q92989(CLP1)		Q9BR09(NEURL2)													Q8NI60(CABC1)							Q9UL46(PSME2)
			Q9Y3D3(MRPS16)							Q9C0J9(BHLHE41)	Q9BQ48(MRPL34)										Q96A55(VPS26B)		Q9BRJ2(MRPL45)													Q8TAA5(GRPEL2)							Q9UNK0(STX8)
			Q9Y4Y9(LSM5)							Q9H0P0(NT5C3)	Q9BQ83(SULT1A3)										Q96BD0(SLCO4A1)		Q9BRP1(PDCD2L)													Q8TBK6(ZCCHC10)							Q9UNQ2(DIMT1L)
			Q9Y5P8(PPP2R3B)							Q9H3E2(SNX25)	Q9BR09(NEURL2)										Q96BP3(PPWD1)		Q9BV20(MRI1)													Q8TEK0(PHF15)							Q9UNX3(RPL26L1)
			Q9Y5R5(DMRT2)							Q9H4Q4(PRDM12)	Q9BRJ2(MRPL45)										Q96DA6(DNAJC19)		Q9BV35(SLC25A23)													Q8WUJ0(STYX)							Q9Y232(CDYL)
			Q9Y5T5(USP16)							Q9H840(GEMIN7)	Q9BRP1(PDCD2L)										Q96EE3(SEH1L)		Q9BVJ6(UTP14A)													Q8WVM0(TFB1M)							Q9Y265(RUVBL1)
			Q9Y617(PSAT1)							Q9H936(SLC25A22)	Q9BTZ2(DHRS4)										Q96F76(RNMTL1)		Q9BWJ5(SF3B5)													Q8WY91(THAP4)							Q9Y276(BCS1L)
			Q9Y673(ALG5)							Q9HAQ2(KIF9)	Q9BV20(MRI1)										Q96G21(IMP4)		Q9BXH1(BBC3)													Q8WZA4(COLEC12)							Q9Y285(FARSA)
			Q9Y6G3(MRPL42)							Q9HC21(SLC25A19)	Q9BV35(SLC25A23)										Q96G46(DUS3L)		Q9BXI9(C1QTNF6)													Q92499(DDX1)							Q9Y2B2(PIGL)
			Q9Y6I4(USP3)							Q9HD33(MRPL47)	Q9BVJ6(UTP14A)										Q96G61(NUDT11)		Q9BXW6(OSBPL1A)													Q92552(MRPS27)							Q9Y2Q9(MRPS28)
										Q9NPA3(MID1IP1)	Q9BWJ5(SF3B5)										Q96HZ4(HES6)		Q9BY08(EBPL)													Q92597(NDRG1)							Q9Y2R5(MRPS17)
										Q9NQV6(PRDM10)	Q9BXH1(BBC3)										Q96I44(STK40)		Q9BYB4(GNB1L)													Q92665(MRPS31)							Q9Y2S0(POLR1D)
										Q9NQZ2(UTP3)	Q9BXI9(C1QTNF6)										Q96RL7(VPS13A)		Q9BYD2(MRPL9)													Q92737(RASL10A)							Q9Y2X3(NOP58)
										Q9NR45(NANS)	Q9BXW6(OSBPL1A)										Q96RU7(TRIB3)		Q9BZF3(OSBPL6)													Q92963(RIT1)							Q9Y333(LSM2)
										Q9NR55(BATF3)	Q9BY08(EBPL)										Q96SB4(SRPK1)		Q9BZR6(RTN4R)													Q92989(CLP1)							Q9Y3A2(UTP11L)
										Q9NRN9(METTL5)	Q9BYD2(MRPL9)										Q99519(NEU1)		Q9C029(TRIM7)													Q96A55(VPS26B)							Q9Y3D3(MRPS16)
										Q9NWU1(OXSM)	Q9BZF3(OSBPL6)										Q99547(MPHOSPH6)		Q9C0J9(BHLHE41)													Q96BD0(SLCO4A1)							Q9Y3D9(MRPS23)
										Q9NXB8(PXK)	Q9BZR6(RTN4R)										Q99689(FEZ1)		Q9H0P0(NT5C3)													Q96BP3(PPWD1)							Q9Y3E5(PTRH2)
										Q9NXP7(GIN1)	Q9BZX2(UCK2)										Q99708(RBBP8)		Q9H3E2(SNX25)													Q96C01(FAM136A)							Q9Y3S2(ZNF330)
										Q9NY12(GAR1)	Q9C029(TRIM7)										Q99848(EBNA1BP2)		Q9H4Q4(PRDM12)													Q96C19(EFHD2)							Q9Y4Y9(LSM5)
										Q9NYA1(SPHK1)	Q9C0J9(BHLHE41)										Q99933(BAG1)		Q9H840(GEMIN7)													Q96DA6(DNAJC19)							Q9Y5L4(TIMM13)
										Q9NYY3(PLK2)	Q9H0P0(NT5C3)										Q9BPZ3()		Q9H936(SLC25A22)													Q96DN2(VWCE)							Q9Y5P8(PPP2R3B)
										Q9P0J6(MRPL36)	Q9H3E2(SNX25)										Q9BQ48(MRPL34)		Q9HAQ2(KIF9)													Q96DU0(ALG10)							Q9Y5R5(DMRT2)
										Q9P0X2(HSPA14)	Q9H4Q4(PRDM12)										Q9BQ83(SULT1A3)		Q9HC21(SLC25A19)													Q96F76(RNMTL1)							Q9Y5T5(USP16)
										Q9P288(BCCIP)	Q9H840(GEMIN7)										Q9BR09(NEURL2)		Q9HD33(MRPL47)													Q96G21(IMP4)							Q9Y673(ALG5)
										Q9P2J5(LARS)	Q9H936(SLC25A22)										Q9BRJ2(MRPL45)		Q9NPA3(MID1IP1)													Q96G46(DUS3L)							Q9Y6G3(MRPL42)
										Q9UBF6(RNF7)	Q9HAQ2(KIF9)										Q9BRP1(PDCD2L)		Q9NQV6(PRDM10)													Q96G61(NUDT11)
										Q9UFF9(CNOT8)	Q9HBH5(RDH14)										Q9BTZ2(DHRS4)		Q9NQZ2(UTP3)													Q96HZ4(HES6)
										Q9UGM6(WARS2)	Q9HC21(SLC25A19)										Q9BV20(MRI1)		Q9NR45(NANS)													Q96I44(STK40)
										Q9UHV9(PFDN2)	Q9HD33(MRPL47)										Q9BV35(SLC25A23)		Q9NR55(BATF3)													Q96RL7(VPS13A)
										Q9UI42(CPA4)	Q9NPA3(MID1IP1)										Q9BVJ6(UTP14A)		Q9NRN9(METTL5)													Q96RU7(TRIB3)
										Q9UJA2(CRLS1)	Q9NQV6(PRDM10)										Q9BWJ5(SF3B5)		Q9NWU1(OXSM)													Q96SB4(SRPK1)
										Q9UKD2(MRTO4)	Q9NQZ2(UTP3)										Q9BXH1(BBC3)		Q9NXB8(PXK)													Q99519(NEU1)
										Q9UKF6(CPSF3)	Q9NR45(NANS)										Q9BXI9(C1QTNF6)		Q9NXP7(GIN1)													Q99547(MPHOSPH6)
										Q9UNK0(STX8)	Q9NR55(BATF3)										Q9BXW6(OSBPL1A)		Q9NY12(GAR1)													Q99689(FEZ1)
										Q9UNQ2(DIMT1L)	Q9NRN9(METTL5)										Q9BY08(EBPL)		Q9NYA1(SPHK1)													Q99933(BAG1)
										Q9UNX3(RPL26L1)	Q9NWU1(OXSM)										Q9BYB4(GNB1L)		Q9NYY3(PLK2)													Q9BPZ3()
										Q9Y232(CDYL)	Q9NXB8(PXK)										Q9BYD2(MRPL9)		Q9P035(PTPLAD1)													Q9BQ48(MRPL34)
										Q9Y265(RUVBL1)	Q9NXP7(GIN1)										Q9BZF3(OSBPL6)		Q9P0J6(MRPL36)													Q9BQ83(SULT1A3)
										Q9Y276(BCS1L)	Q9NY12(GAR1)										Q9BZR6(RTN4R)		Q9P0X2(HSPA14)													Q9BR61(ACBD6)
										Q9Y285(FARSA)	Q9NYA1(SPHK1)										Q9BZX2(UCK2)		Q9P288(BCCIP)													Q9BRJ2(MRPL45)
										Q9Y289(SLC5A6)	Q9NYY3(PLK2)										Q9C029(TRIM7)		Q9P2J5(LARS)													Q9BSA5(AEN)
										Q9Y295(DRG1)	Q9P0J6(MRPL36)										Q9C0J9(BHLHE41)		Q9UBF6(RNF7)													Q9BTZ2(DHRS4)
										Q9Y2B2(PIGL)	Q9P0X2(HSPA14)										Q9H0P0(NT5C3)		Q9UBI1(COMMD3)													Q9BU19(ZNF692)
										Q9Y2R5(MRPS17)	Q9P288(BCCIP)										Q9H3E2(SNX25)		Q9UFF9(CNOT8)													Q9BV35(SLC25A23)
										Q9Y2S0(POLR1D)	Q9P2J5(LARS)										Q9H4Q4(PRDM12)		Q9UGM6(WARS2)													Q9BVJ6(UTP14A)
										Q9Y2X3(NOP58)	Q9UBF6(RNF7)										Q9H840(GEMIN7)		Q9UHV9(PFDN2)													Q9BWG4(SSBP4)
										Q9Y333(LSM2)	Q9UBL6(CPNE7)										Q9H936(SLC25A22)		Q9UI42(CPA4)													Q9BXH1(BBC3)
										Q9Y3A2(UTP11L)	Q9UFF9(CNOT8)										Q9HAQ2(KIF9)		Q9UJA2(CRLS1)													Q9BXW6(OSBPL1A)
										Q9Y3D3(MRPS16)	Q9UGM6(WARS2)										Q9HBH5(RDH14)		Q9UKD2(MRTO4)													Q9BY08(EBPL)
										Q9Y3E5(PTRH2)	Q9UHV9(PFDN2)										Q9HC21(SLC25A19)		Q9UKF6(CPSF3)													Q9BYB4(GNB1L)
										Q9Y4Y9(LSM5)	Q9UHY7(ENOPH1)										Q9HD33(MRPL47)		Q9UNK0(STX8)													Q9BYC8(MRPL32)
										Q9Y580(REXO2)	Q9UI42(CPA4)										Q9NPA3(MID1IP1)		Q9UNQ2(DIMT1L)													Q9BYD2(MRPL9)
										Q9Y5L4(TIMM13)	Q9UJA2(CRLS1)										Q9NQ50(MRPL40)		Q9UNX3(RPL26L1)													Q9BYN8(MRPS26)
										Q9Y5P8(PPP2R3B)	Q9UKD2(MRTO4)										Q9NQV6(PRDM10)		Q9Y232(CDYL)													Q9BZR6(RTN4R)
										Q9Y5R5(DMRT2)	Q9UKF6(CPSF3)										Q9NQZ2(UTP3)		Q9Y265(RUVBL1)													Q9BZX2(UCK2)
										Q9Y5T5(USP16)	Q9UL46(PSME2)										Q9NR45(NANS)		Q9Y276(BCS1L)													Q9C029(TRIM7)
										Q9Y617(PSAT1)	Q9UNK0(STX8)										Q9NR55(BATF3)		Q9Y285(FARSA)													Q9C0J9(BHLHE41)
										Q9Y673(ALG5)	Q9UNQ2(DIMT1L)										Q9NRN9(METTL5)		Q9Y289(SLC5A6)													Q9H0P0(NT5C3)
										Q9Y6G3(MRPL42)	Q9UNX3(RPL26L1)										Q9NWU1(OXSM)		Q9Y295(DRG1)													Q9H3E2(SNX25)
										Q9Y6I4(USP3)	Q9Y232(CDYL)										Q9NXB8(PXK)		Q9Y2B2(PIGL)													Q9H4Q4(PRDM12)
											Q9Y265(RUVBL1)										Q9NXP7(GIN1)		Q9Y2R5(MRPS17)													Q9H840(GEMIN7)
											Q9Y276(BCS1L)										Q9NY12(GAR1)		Q9Y2S0(POLR1D)													Q9H936(SLC25A22)
											Q9Y285(FARSA)										Q9NYA1(SPHK1)		Q9Y2X3(NOP58)													Q9HAQ2(KIF9)
											Q9Y289(SLC5A6)										Q9NYY3(PLK2)		Q9Y333(LSM2)													Q9HBH5(RDH14)
											Q9Y295(DRG1)										Q9P035(PTPLAD1)		Q9Y3A2(UTP11L)													Q9HC21(SLC25A19)
											Q9Y2B2(PIGL)										Q9P0J6(MRPL36)		Q9Y3D3(MRPS16)													Q9HD33(MRPL47)
											Q9Y2R5(MRPS17)										Q9P0X2(HSPA14)		Q9Y3E5(PTRH2)													Q9NPA3(MID1IP1)
											Q9Y2S0(POLR1D)										Q9P288(BCCIP)		Q9Y4Y9(LSM5)													Q9NQ50(MRPL40)
											Q9Y2X3(NOP58)										Q9P2J5(LARS)		Q9Y580(REXO2)													Q9NQV6(PRDM10)
											Q9Y333(LSM2)										Q9UBF6(RNF7)		Q9Y5L4(TIMM13)													Q9NQZ2(UTP3)
											Q9Y3A2(UTP11L)										Q9UBI1(COMMD3)		Q9Y5P8(PPP2R3B)													Q9NR45(NANS)
											Q9Y3D3(MRPS16)										Q9UBL6(CPNE7)		Q9Y5R5(DMRT2)													Q9NR55(BATF3)
											Q9Y3E5(PTRH2)										Q9UFF9(CNOT8)		Q9Y5T5(USP16)													Q9NRG4(SMYD2)
											Q9Y4Y9(LSM5)										Q9UGM6(WARS2)		Q9Y617(PSAT1)													Q9NRN9(METTL5)
											Q9Y580(REXO2)										Q9UHV9(PFDN2)		Q9Y673(ALG5)													Q9NTK5(OLA1)
											Q9Y5L4(TIMM13)										Q9UHY7(ENOPH1)		Q9Y6G3(MRPL42)													Q9NWB7(IFT57)
											Q9Y5P8(PPP2R3B)										Q9UI42(CPA4)		Q9Y6I4(USP3)													Q9NWU1(OXSM)
											Q9Y5R5(DMRT2)										Q9UJA2(CRLS1)															Q9NXB8(PXK)
											Q9Y5T5(USP16)										Q9UKD2(MRTO4)															Q9NXP7(GIN1)
											Q9Y617(PSAT1)										Q9UKF6(CPSF3)															Q9NY12(GAR1)
											Q9Y673(ALG5)										Q9UL46(PSME2)															Q9NY61(AATF)
											Q9Y6G3(MRPL42)										Q9UNK0(STX8)															Q9NYA1(SPHK1)
											Q9Y6I4(USP3)										Q9UNQ2(DIMT1L)															Q9NYA3(GOLGA6)
																					Q9UNX3(RPL26L1)															Q9NYY3(PLK2)
																					Q9Y232(CDYL)															Q9P035(PTPLAD1)
																					Q9Y265(RUVBL1)															Q9P0J6(MRPL36)
																					Q9Y276(BCS1L)															Q9P0X2(HSPA14)
																					Q9Y285(FARSA)															Q9P2J5(LARS)
																					Q9Y289(SLC5A6)															Q9P2M4(TBC1D14)
																					Q9Y295(DRG1)															Q9UBF6(RNF7)
																					Q9Y2B2(PIGL)															Q9UBI1(COMMD3)
																					Q9Y2Q9(MRPS28)															Q9UBL6(CPNE7)
																					Q9Y2R5(MRPS17)															Q9UFF9(CNOT8)
																					Q9Y2S0(POLR1D)															Q9UGM6(WARS2)
																					Q9Y2X3(NOP58)															Q9UHV9(PFDN2)
																					Q9Y333(LSM2)															Q9UHY7(ENOPH1)
																					Q9Y3A2(UTP11L)															Q9UI42(CPA4)
																					Q9Y3D3(MRPS16)															Q9UJA2(CRLS1)
																					Q9Y3E5(PTRH2)															Q9UKF6(CPSF3)
																					Q9Y3S2(ZNF330)															Q9UL46(PSME2)
																					Q9Y4Y9(LSM5)															Q9UNQ2(DIMT1L)
																					Q9Y580(REXO2)															Q9UNX3(RPL26L1)
																					Q9Y5L4(TIMM13)															Q9Y232(CDYL)
																					Q9Y5P8(PPP2R3B)															Q9Y265(RUVBL1)
																					Q9Y5R5(DMRT2)															Q9Y276(BCS1L)
																					Q9Y5T5(USP16)															Q9Y285(FARSA)
																					Q9Y617(PSAT1)															Q9Y289(SLC5A6)
																					Q9Y673(ALG5)															Q9Y295(DRG1)
																					Q9Y6G3(MRPL42)															Q9Y2B2(PIGL)
																					Q9Y6I4(USP3)															Q9Y2Q9(MRPS28)
																																				Q9Y2R5(MRPS17)
																																				Q9Y2S0(POLR1D)
																																				Q9Y2X3(NOP58)
																																				Q9Y333(LSM2)
																																				Q9Y3A2(UTP11L)
																																				Q9Y3D3(MRPS16)
																																				Q9Y3D9(MRPS23)
																																				Q9Y3E5(PTRH2)
																																				Q9Y3S2(ZNF330)
																																				Q9Y4Y9(LSM5)
																																				Q9Y580(REXO2)
																																				Q9Y5L4(TIMM13)
																																				Q9Y5P8(PPP2R3B)
																																				Q9Y5R5(DMRT2)
																																				Q9Y5T5(USP16)
																																				Q9Y617(PSAT1)
																																				Q9Y673(ALG5)
																																				Q9Y6G3(MRPL42)
																																				Q9Y6I4(USP3)
[truncated: 15 more columns]

## Sheet: Repressed in MYC Signature
	Biological process terms																	Function terms									Component terms
GO term ID	GO:0007275	GO:0048513	GO:0007596	GO:0050817	GO:0042060	GO:0007599	GO:0007165	GO:0007154	GO:0009611	GO:0050878	GO:0050874	GO:0009605	GO:0008150	GO:0001558	GO:0040008			GO term ID	GO:0005520	GO:0019838	GO:0001619	GO:0045125	GO:0004871	GO:0005515			GO term ID	GO:0005576	GO:0005575	GO:0005615	GO:0016020
GO term description	development	organ development	blood coagulation	coagulation	wound healing	hemostasis	signal transduction	cell communication	response to wounding	regulation of body fluids	organismal physiological process	response to external stimulus	biological_process	regulation of cell growth	regulation of growth			GO term description	insulin-like growth factor binding	growth factor binding	lysosphingolipid and lysophosphatidic acid receptor activity	bioactive lipid receptor activity	signal transducer activity	protein binding			GO term description	extracellular region	cellular_component	extracellular space	membrane
P-value (Bonferroni-corrected)	0.0001543	0.0007301	0.001809	0.001809	0.002363	0.002575	0.002756	0.004116	0.004809	0.004891	0.005137	0.01314	0.01935	0.03091	0.03553			P-value (Bonferroni-corrected)	1.46e-06	8.958e-06	0.02681	0.02681	0.04269	0.04758			P-value (Bonferroni-corrected)	3.828e-08	0.0001804	0.01351	0.01713
Member genes	O00300(TNFRSF11B)	O00300(TNFRSF11B)	P05121(SERPINE1)	P05121(SERPINE1)	P05121(SERPINE1)	P05121(SERPINE1)	O00300(TNFRSF11B)	O00300(TNFRSF11B)	O60507(TPST1)	P05121(SERPINE1)	O43889(CREB3)	O43889(CREB3)	O00300(TNFRSF11B)	P17936(IGFBP3)	P17936(IGFBP3)			Member genes	P17936(IGFBP3)	P17936(IGFBP3)	P21453(S1PR1)	P21453(S1PR1)	O00300(TNFRSF11B)	O00300(TNFRSF11B)			Member genes	O00300(TNFRSF11B)	O00300(TNFRSF11B)	O60565(GREM1)	O43889(CREB3)
	O60565(GREM1)	P09493(TPM1)	P05155(SERPING1)	P05155(SERPING1)	P05155(SERPING1)	P05155(SERPING1)	O94907(DKK1)	O94907(DKK1)	P05121(SERPINE1)	P05155(SERPING1)	O60507(TPST1)	O60507(TPST1)	O15460(P4HA2)	P22692(IGFBP4)	P22692(IGFBP4)				P22692(IGFBP4)	P22692(IGFBP4)	Q92633(LPAR1)	Q92633(LPAR1)	O60565(GREM1)	O15460(P4HA2)				O60565(GREM1)	O15460(P4HA2)	P05121(SERPINE1)	O60238(BNIP3L)
	O76011(KRT34)	P12107(COL11A1)	P13726(F3)	P13726(F3)	P13726(F3)	P13726(F3)	P13987(CD59)	P05161(ISG15)	P05155(SERPING1)	P13726(F3)	P05121(SERPINE1)	P05121(SERPINE1)	O43889(CREB3)	P24592(IGFBP6)	P24592(IGFBP6)				P24592(IGFBP6)	P24592(IGFBP6)			O94907(DKK1)	O43889(CREB3)				O94907(DKK1)	O43889(CREB3)	P05155(SERPING1)	O60507(TPST1)
	O94907(DKK1)	P17301(ITGA2)	P13987(CD59)	P13987(CD59)	P13987(CD59)	P13987(CD59)	P16234(PDGFRA)	P12107(COL11A1)	P13726(F3)	P13987(CD59)	P05155(SERPING1)	P05155(SERPING1)	O60238(BNIP3L)	Q16270(IGFBP7)	Q16270(IGFBP7)				Q16270(IGFBP7)	P40189(IL6ST)			P13726(F3)	O60565(GREM1)				P05121(SERPINE1)	O60238(BNIP3L)	P05161(ISG15)	O60513(B4GALT4)
	P09493(TPM1)	P17936(IGFBP3)	P17301(ITGA2)	P17301(ITGA2)	P17301(ITGA2)	P17301(ITGA2)	P17301(ITGA2)	P13987(CD59)	P13987(CD59)	P17301(ITGA2)	P05161(ISG15)	P13726(F3)	O60507(TPST1)	Q9NQ30(ESM1)	Q9NQ30(ESM1)				Q9NQ30(ESM1)	Q16270(IGFBP7)			P16234(PDGFRA)	O94907(DKK1)				P05155(SERPING1)	O60507(TPST1)	P08254(MMP3)	P13498(CYBA)
	P12107(COL11A1)	P22692(IGFBP4)	P48307(TFPI2)	P48307(TFPI2)	P48307(TFPI2)	P48307(TFPI2)	P17936(IGFBP3)	P16234(PDGFRA)	P17301(ITGA2)	P48307(TFPI2)	P09493(TPM1)	P13987(CD59)	O60513(B4GALT4)							Q9NQ30(ESM1)			P17301(ITGA2)	P01106()				P05161(ISG15)	O60513(B4GALT4)	P24592(IGFBP6)	P13726(F3)
	P17301(ITGA2)	P24844(MYL9)					P20337(RAB3B)	P17301(ITGA2)	P17693(HLA-G)		P12107(COL11A1)	P17301(ITGA2)	O60565(GREM1)										P17693(HLA-G)	P05161(ISG15)				P08254(MMP3)	O60565(GREM1)	P35318(ADM)	P13987(CD59)
	P17936(IGFBP3)	P49767(VEGFC)					P21453(S1PR1)	P17936(IGFBP3)	P35318(ADM)		P13726(F3)	P17693(HLA-G)	O76011(KRT34)										P21453(S1PR1)	P09493(TPM1)				P12107(COL11A1)	O76011(KRT34)	P48061(CXCL12)	P16234(PDGFRA)
	P22692(IGFBP4)	P55287(CDH11)					P22692(IGFBP4)	P20337(RAB3B)	P48061(CXCL12)		P13987(CD59)	P35318(ADM)	O94907(DKK1)										P23229(ITGA6)	P12107(COL11A1)				P17936(IGFBP3)	O94907(DKK1)	Q12841(FSTL1)	P17301(ITGA2)
	P23560(BDNF)	Q05682(CALD1)					P23229(ITGA6)	P21453(S1PR1)	P48307(TFPI2)		P17301(ITGA2)	P40121(CAPG)	O94925(GLS)										P23560(BDNF)	P13987(CD59)				P22692(IGFBP4)	O94925(GLS)	Q8IWU6(SULF1)	P17693(HLA-G)
	P24592(IGFBP6)	Q16394(EXT1)					P24592(IGFBP6)	P22692(IGFBP4)			P17693(HLA-G)	P48061(CXCL12)	O95084(PRSS23)										P30559(OXTR)	P17301(ITGA2)				P24592(IGFBP6)	P00352(ALDH1A1)		P21453(S1PR1)
	P24844(MYL9)	Q16585(SGCB)					P28300(LOX)	P23229(ITGA6)			P24844(MYL9)	P48307(TFPI2)	P00352(ALDH1A1)										P35318(ADM)	P17936(IGFBP3)				P24821(TNC)	P01106()		P23229(ITGA6)
	P40123(CAP2)	Q99814(EPAS1)					P30559(OXTR)	P24592(IGFBP6)			P27487(DPP4)	Q01524(DEFA6)	P01106()										P40189(IL6ST)	P22692(IGFBP4)				P28300(LOX)	P05121(SERPINE1)		P24310(COX7A1)
	P49767(VEGFC)						P35318(ADM)	P24821(TNC)			P30559(OXTR)		P05121(SERPINE1)										P48061(CXCL12)	P23229(ITGA6)				P35318(ADM)	P05155(SERPING1)		P27487(DPP4)
	P52926(HMGA2)						P40123(CAP2)	P28300(LOX)			P35318(ADM)		P05155(SERPING1)										P49767(VEGFC)	P23560(BDNF)				P48061(CXCL12)	P05161(ISG15)		P30559(OXTR)
	P55287(CDH11)						P40189(IL6ST)	P30559(OXTR)			P40189(IL6ST)		P05161(ISG15)										P78552(IL13RA1)	P24592(IGFBP6)				P48307(TFPI2)	P08254(MMP3)		P36021(SLC16A2)
	Q05682(CALD1)						P48061(CXCL12)	P35318(ADM)			P48061(CXCL12)		P08254(MMP3)										Q05513(PRKCZ)	P24821(TNC)				Q01524(DEFA6)	P09493(TPM1)		P40123(CAP2)
	Q14563(SEMA3A)						P49767(VEGFC)	P40123(CAP2)			P48307(TFPI2)		P09493(TPM1)										Q15628(TRADD)	P35318(ADM)				Q12841(FSTL1)	P12107(COL11A1)		P40189(IL6ST)
	Q16270(IGFBP7)						P78552(IL13RA1)	P40189(IL6ST)			P51911(CNN1)		P12107(COL11A1)										Q92633(LPAR1)	P40121(CAPG)				Q14563(SEMA3A)	P13498(CYBA)		P49767(VEGFC)
	Q16394(EXT1)						Q05513(PRKCZ)	P48061(CXCL12)			P55287(CDH11)		P13498(CYBA)										Q99814(EPAS1)	P40189(IL6ST)				Q16270(IGFBP7)	P13726(F3)		P55287(CDH11)
	Q16585(SGCB)						Q15628(TRADD)	P49767(VEGFC)			Q01524(DEFA6)		P13726(F3)										Q9H1J7(WNT5B)	P48061(CXCL12)				Q16585(SGCB)	P13987(CD59)		P78552(IL13RA1)
	Q93045(STMN2)						Q16394(EXT1)	P55287(CDH11)			Q05682(CALD1)		P13987(CD59)										Q9NQ30(ESM1)	P49767(VEGFC)				Q8IWU6(SULF1)	P16234(PDGFRA)		P80723(BASP1)
	Q99814(EPAS1)						Q7Z5R6(APBB1IP)	P78552(IL13RA1)					P16234(PDGFRA)											P51911(CNN1)				Q9H1J7(WNT5B)	P17301(ITGA2)		Q05513(PRKCZ)
	Q9H1J7(WNT5B)						Q92633(LPAR1)	Q05513(PRKCZ)					P17301(ITGA2)											P55287(CDH11)				Q9HCU0(CD248)	P17693(HLA-G)		Q07065(CKAP4)
	Q9NQ30(ESM1)						Q92963(RIT1)	Q15628(TRADD)					P17693(HLA-G)											Q05513(PRKCZ)				Q9NQ30(ESM1)	P17936(IGFBP3)		Q14410(GK2)
							Q93045(STMN2)	Q16394(EXT1)					P17936(IGFBP3)											Q05682(CALD1)					P21291(CSRP1)		Q16394(EXT1)
							Q99814(EPAS1)	Q7Z5R6(APBB1IP)					P20337(RAB3B)											Q15628(TRADD)					P21453(S1PR1)		Q16585(SGCB)
							Q9H1J7(WNT5B)	Q92633(LPAR1)					P21453(S1PR1)											Q16270(IGFBP7)					P22692(IGFBP4)		Q8TDE7(TOM1L2)
								Q92963(RIT1)					P22692(IGFBP4)											Q92963(RIT1)					P23229(ITGA6)		Q8WUG5(SLC22A17)
								Q93045(STMN2)					P23229(ITGA6)											Q99814(EPAS1)					P24310(COX7A1)		Q92633(LPAR1)
								Q99814(EPAS1)					P23560(BDNF)											Q9NQ30(ESM1)					P24592(IGFBP6)		Q92963(RIT1)
								Q9H1J7(WNT5B)					P24310(COX7A1)											Q9Y4X4(KLF12)					P24821(TNC)		Q93045(STMN2)
													P24592(IGFBP6)																P24844(MYL9)		Q96S97(MYADM)
													P24821(TNC)																P27487(DPP4)		Q9BZL3(MST150)
													P24844(MYL9)																P28300(LOX)		Q9H013(ADAM19)
													P27487(DPP4)																P30559(OXTR)
													P28300(LOX)																P35318(ADM)
													P28562(DUSP1)																P36021(SLC16A2)
													P30559(OXTR)																P40121(CAPG)
													P35318(ADM)																P40123(CAP2)
													P36021(SLC16A2)																P40189(IL6ST)
													P40121(CAPG)																P48061(CXCL12)
													P40123(CAP2)																P48307(TFPI2)
													P40189(IL6ST)																P49767(VEGFC)
													P48061(CXCL12)																P52926(HMGA2)
													P48307(TFPI2)																P55287(CDH11)
													P49767(VEGFC)																P78552(IL13RA1)
													P51911(CNN1)																P80723(BASP1)
													P52926(HMGA2)																Q01524(DEFA6)
													P55287(CDH11)																Q05513(PRKCZ)
													P78552(IL13RA1)																Q05682(CALD1)
													P98082(DAB2)																Q07065(CKAP4)
													Q01524(DEFA6)																Q12841(FSTL1)
													Q05513(PRKCZ)																Q14410(GK2)
													Q05682(CALD1)																Q14563(SEMA3A)
													Q14410(GK2)																Q16270(IGFBP7)
													Q14563(SEMA3A)																Q16394(EXT1)
													Q15628(TRADD)																Q16585(SGCB)
													Q16270(IGFBP7)																Q8IWU6(SULF1)
													Q16394(EXT1)																Q8TDE7(TOM1L2)
													Q16585(SGCB)																Q8WUG5(SLC22A17)
													Q7Z5R6(APBB1IP)																Q92633(LPAR1)
													Q8IWU6(SULF1)																Q92963(RIT1)
													Q8TDE7(TOM1L2)																Q93045(STMN2)
													Q8WUG5(SLC22A17)																Q96CV9(OPTN)
													Q92633(LPAR1)																Q96S97(MYADM)
													Q92963(RIT1)																Q99814(EPAS1)
													Q93045(STMN2)																Q9BYS1(KRTAP1-5)
													Q99814(EPAS1)																Q9BZL3(MST150)
													Q9BYS1(KRTAP1-5)																Q9H013(ADAM19)
													Q9H013(ADAM19)																Q9H1J7(WNT5B)
													Q9H1J7(WNT5B)																Q9H299(SH3BGRL3)
													Q9HCU0(CD248)																Q9HCU0(CD248)
													Q9NQ30(ESM1)																Q9NQ30(ESM1)
													Q9Y4X4(KLF12)																Q9Y4X4(KLF12)
																													Q9Y6N5(SQRDL)

## Sheet: Induced in MYC Signature
Biological process terms																										Function terms							Component terms
GO term ID	GO:0006396	GO:0016070	GO:0007046	GO:0042254	GO:0007028	GO:0006364	GO:0016072	GO:0006397	GO:0043170	GO:0000375	GO:0000377	GO:0000398	GO:0044237	GO:0016071	GO:0008152	GO:0006139	GO:0008380	GO:0044238	GO:0050875	GO:0009058	GO:0006445	GO:0006412	GO:0044249			GO term ID	GO:0003723	GO:0003735	GO:0003676	GO:0051082			GO term ID	GO:0030529	GO:0005622	GO:0043227	GO:0043231	GO:0005730	GO:0043226	GO:0043229	GO:0005634	GO:0043234	GO:0005737	GO:0005739	GO:0043228	GO:0043232	GO:0005732
GO term description	RNA processing	RNA metabolism	ribosome biogenesis	ribosome biogenesis and assembly	cytoplasm organization and biogenesis	rRNA processing	rRNA metabolism	mRNA processing	macromolecule metabolism	RNA splicing, via transesterification reactions	RNA splicing, via transesterification reactions with bulged adenosine as nucleophile	nuclear mRNA splicing, via spliceosome	cellular metabolism	mRNA metabolism	metabolism	nucleobase, nucleoside, nucleotide and nucleic acid metabolism	RNA splicing	primary metabolism	cellular physiological process	biosynthesis	regulation of translation	protein biosynthesis	cellular biosynthesis			GO term description	RNA binding	structural constituent of ribosome	nucleic acid binding	unfolded protein binding			GO term description	ribonucleoprotein complex	intracellular	membrane-bound organelle	intracellular membrane-bound organelle	nucleolus	organelle	intracellular organelle	nucleus	protein complex	cytoplasm	mitochondrion	non-membrane-bound organelle	intracellular non-membrane-bound organelle	small nucleolar ribonucleoprotein complex
P-value (Bonferroni-corrected)	0	1.163e-09	4.961e-09	1.705e-08	2.585e-07	4.556e-06	4.556e-06	0.0001529	0.0001747	0.0001816	0.0001816	0.0001816	0.0004321	0.0006413	0.0009274	0.001053	0.001158	0.002032	0.002659	0.006343	0.007207	0.007506	0.009417			P-value (Bonferroni-corrected)	5.019e-09	2.021e-07	0.000409	0.001132			P-value (Bonferroni-corrected)	0	2.881e-07	6.944e-07	6.944e-07	1.366e-06	4.41e-06	4.41e-06	1.329e-05	1.598e-05	0.0008319	0.001361	0.002666	0.002666	0.008626
Member genes	O00567(NOP56)	O00567(NOP56)	O00567(NOP56)	O00567(NOP56)	O00567(NOP56)	O00567(NOP56)	O00567(NOP56)	P11940(PABPC1)	O00567(NOP56)	Q01081(U2AF1)	Q01081(U2AF1)	Q01081(U2AF1)	O00567(NOP56)	P11940(PABPC1)	O00567(NOP56)	O00567(NOP56)	Q01081(U2AF1)	O00567(NOP56)	O00567(NOP56)	O43422(PRKRIR)	O43422(PRKRIR)	O43422(PRKRIR)	O43422(PRKRIR)			Member genes	O00567(NOP56)	P22090(RPS4Y1)	O00567(NOP56)	P38646(HSPA9)			Member genes	P05198(EIF2S1)	O00567(NOP56)	O00567(NOP56)	O00567(NOP56)	O00567(NOP56)	O00567(NOP56)	O00567(NOP56)	O00567(NOP56)	O15318(POLR3G)	P05198(EIF2S1)	P08574(CYC1)	O00567(NOP56)	O00567(NOP56)	Q9NY12(GAR1)
	P11940(PABPC1)	P11940(PABPC1)	P22087(FBL)	P22087(FBL)	P22087(FBL)	P22087(FBL)	P22087(FBL)	Q01081(U2AF1)	O43422(PRKRIR)	Q15393(SF3B3)	Q15393(SF3B3)	Q15393(SF3B3)	O15318(POLR3G)	Q01081(U2AF1)	O15318(POLR3G)	O15318(POLR3G)	Q15393(SF3B3)	O15318(POLR3G)	O15318(POLR3G)	P05198(EIF2S1)	P05198(EIF2S1)	P05198(EIF2S1)	P05198(EIF2S1)				P05198(EIF2S1)	P23396(RPS3)	O43422(PRKRIR)	P48643(CCT5)				P22087(FBL)	O15318(POLR3G)	O15318(POLR3G)	O15318(POLR3G)	P19338(NCL)	O15318(POLR3G)	O15318(POLR3G)	O15318(POLR3G)	P05198(EIF2S1)	P07195(LDHB)	P13995(MTHFD2)	P17317(H2AFZ)	P17317(H2AFZ)	Q9Y333(LSM2)
	P22087(FBL)	P22087(FBL)	Q14137(BOP1)	Q14137(BOP1)	Q14137(BOP1)	Q14137(BOP1)	Q14137(BOP1)	Q12996(CSTF3)	P05198(EIF2S1)	Q16629(SFRS7)	Q16629(SFRS7)	Q16629(SFRS7)	O43422(PRKRIR)	Q12996(CSTF3)	O43422(PRKRIR)	P06454(PTMA)	Q16629(SFRS7)	O43422(PRKRIR)	O43422(PRKRIR)	P11926(ODC1)	P11940(PABPC1)	P11940(PABPC1)	P11926(ODC1)				P11940(PABPC1)	P46777(RPL5)	P05198(EIF2S1)	P50990(CCT8)				P22090(RPS4Y1)	P05198(EIF2S1)	P06454(PTMA)	P06454(PTMA)	P46087(NOP2)	P06454(PTMA)	P06454(PTMA)	P06454(PTMA)	P17317(H2AFZ)	P08574(CYC1)	P15954(COX7C)	P18754(RCC1)	P18754(RCC1)	Q9Y4Y9(LSM5)
	P52597(HNRNPF)	P52597(HNRNPF)	Q14978(NOLC1)	Q14978(NOLC1)	Q14978(NOLC1)	Q14978(NOLC1)	Q14978(NOLC1)	Q15393(SF3B3)	P07195(LDHB)	Q86V81(THOC4)	Q86V81(THOC4)	Q86V81(THOC4)	O75608(LYPLA1)	Q15393(SF3B3)	O75608(LYPLA1)	P09874(PARP1)	Q86V81(THOC4)	O75608(LYPLA1)	O75608(LYPLA1)	P11940(PABPC1)	Q15056(EIF4H)	P22090(RPS4Y1)	P11940(PABPC1)				P19338(NCL)	P47914(RPL29)	P09874(PARP1)	Q86V81(THOC4)				P23396(RPS3)	P06454(PTMA)	P08574(CYC1)	P08574(CYC1)	Q13428(TCOF1)	P08574(CYC1)	P08574(CYC1)	P09874(PARP1)	P22087(FBL)	P11940(PABPC1)	P24539(ATP5F1)	P19338(NCL)	P19338(NCL)
	Q01081(U2AF1)	Q01081(U2AF1)	Q92499(DDX1)	Q92499(DDX1)	Q92499(DDX1)	Q9NY12(GAR1)	Q9NY12(GAR1)	Q16629(SFRS7)	P09874(PARP1)	Q92499(DDX1)	Q92499(DDX1)	Q92499(DDX1)	P05198(EIF2S1)	Q16629(SFRS7)	P05198(EIF2S1)	P11474(ESRRA)	Q92499(DDX1)	P05198(EIF2S1)	P05198(EIF2S1)	P13995(MTHFD2)	Q92499(DDX1)	P23396(RPS3)	P13995(MTHFD2)				P22087(FBL)	Q8N5N7(MRPL50)	P11474(ESRRA)	Q8NI60(CABC1)				P46777(RPL5)	P07195(LDHB)	P09874(PARP1)	P09874(PARP1)	Q14978(NOLC1)	P09874(PARP1)	P09874(PARP1)	P11474(ESRRA)	P22090(RPS4Y1)	P13995(MTHFD2)	P38646(HSPA9)	P22090(RPS4Y1)	P22090(RPS4Y1)
	Q12996(CSTF3)	Q12996(CSTF3)	Q99848(EBNA1BP2)	Q99848(EBNA1BP2)	Q99848(EBNA1BP2)	Q9Y2X3(NOP58)	Q9Y2X3(NOP58)	Q86V81(THOC4)	P11940(PABPC1)	Q96SB4(SRPK1)	Q96SB4(SRPK1)	Q96SB4(SRPK1)	P06454(PTMA)	Q86V81(THOC4)	P06454(PTMA)	P11940(PABPC1)	Q96SB4(SRPK1)	P06454(PTMA)	P06454(PTMA)	P22090(RPS4Y1)	Q9BPZ3()	P46777(RPL5)	P22090(RPS4Y1)				P22090(RPS4Y1)	Q92552(MRPS27)	P11940(PABPC1)	Q8TAA5(GRPEL2)				P47914(RPL29)	P08574(CYC1)	P11474(ESRRA)	P11474(ESRRA)	Q9NY12(GAR1)	P11474(ESRRA)	P11474(ESRRA)	P17317(H2AFZ)	P22234(PAICS)	P15954(COX7C)	Q04837(SSBP1)	P23396(RPS3)	P23396(RPS3)
	Q14103(HNRNPD)	Q14103(HNRNPD)	Q9BVJ6(UTP14A)	Q9BVJ6(UTP14A)	Q9BVJ6(UTP14A)	Q9Y3A2(UTP11L)	Q9Y3A2(UTP11L)	Q92499(DDX1)	P17317(H2AFZ)	Q9Y333(LSM2)	Q9Y333(LSM2)	Q9Y333(LSM2)	P07195(LDHB)	Q92499(DDX1)	P07195(LDHB)	P17317(H2AFZ)	Q9Y333(LSM2)	P07195(LDHB)	P07195(LDHB)	P22102(GART)		P47914(RPL29)	P22102(GART)				P23396(RPS3)	Q9BRJ2(MRPL45)	P17317(H2AFZ)	Q96DA6(DNAJC19)				P52597(HNRNPF)	P09874(PARP1)	P13995(MTHFD2)	P13995(MTHFD2)	Q9Y2X3(NOP58)	P13995(MTHFD2)	P13995(MTHFD2)	P18754(RCC1)	P23396(RPS3)	P22090(RPS4Y1)	Q8NI60(CABC1)	P23497(SP100)	P23497(SP100)
	Q14137(BOP1)	Q14137(BOP1)	Q9NY12(GAR1)	Q9NY12(GAR1)	Q9NY12(GAR1)			Q96SB4(SRPK1)	P18754(RCC1)	Q9Y4Y9(LSM5)	Q9Y4Y9(LSM5)	Q9Y4Y9(LSM5)	P08574(CYC1)	Q96SB4(SRPK1)	P08574(CYC1)	P18754(RCC1)	Q9Y4Y9(LSM5)	P09874(PARP1)	P08574(CYC1)	P22234(PAICS)		Q15056(EIF4H)	P22234(PAICS)				P46777(RPL5)	Q9BYC8(MRPL32)	P18754(RCC1)	Q9UHV9(PFDN2)				Q01081(U2AF1)	P11474(ESRRA)	P15954(COX7C)	P15954(COX7C)	Q9Y333(LSM2)	P15954(COX7C)	P15954(COX7C)	P19338(NCL)	P24539(ATP5F1)	P22102(GART)	Q8TAA5(GRPEL2)	P40937(RFC5)	P40937(RFC5)
	Q14978(NOLC1)	Q14978(NOLC1)	Q9Y2X3(NOP58)	Q9Y2X3(NOP58)	Q9Y2X3(NOP58)			Q9Y333(LSM2)	P22087(FBL)				P09874(PARP1)	Q9Y333(LSM2)	P09874(PARP1)	P22087(FBL)		P11474(ESRRA)	P09874(PARP1)	P23396(RPS3)		Q92499(DDX1)	P23396(RPS3)				P47914(RPL29)	Q9BYN8(MRPS26)	P19338(NCL)	Q9Y2X3(NOP58)				Q14103(HNRNPD)	P11940(PABPC1)	P17317(H2AFZ)	P17317(H2AFZ)	Q9Y4Y9(LSM5)	P17317(H2AFZ)	P17317(H2AFZ)	P22087(FBL)	P40937(RFC5)	P23396(RPS3)	Q92552(MRPS27)	P46087(NOP2)	P46087(NOP2)
	Q15393(SF3B3)	Q15393(SF3B3)	Q9Y3A2(UTP11L)	Q9Y3A2(UTP11L)	Q9Y3A2(UTP11L)			Q9Y4Y9(LSM5)	P22090(RPS4Y1)				P11474(ESRRA)	Q9Y4Y9(LSM5)	P11474(ESRRA)	P22102(GART)		P11926(ODC1)	P11474(ESRRA)	P24539(ATP5F1)		Q9BPZ3()	P24539(ATP5F1)				P52597(HNRNPF)	Q9HD33(MRPL47)	P22087(FBL)					Q15393(SF3B3)	P13995(MTHFD2)	P18754(RCC1)	P18754(RCC1)		P18754(RCC1)	P18754(RCC1)	P23497(SP100)	P46777(RPL5)	P23526(AHCY)	Q96DA6(DNAJC19)	P46777(RPL5)	P46777(RPL5)
	Q16629(SFRS7)	Q16629(SFRS7)							P23396(RPS3)				P11926(ODC1)		P11926(ODC1)	P22234(PAICS)		P11940(PABPC1)	P11926(ODC1)	P46777(RPL5)		Q9BRJ2(MRPL45)	P46777(RPL5)				Q01081(U2AF1)	Q9Y3D9(MRPS23)	P22090(RPS4Y1)					Q86V81(THOC4)	P15954(COX7C)	P19338(NCL)	P19338(NCL)		P19338(NCL)	P19338(NCL)	P31948(STIP1)	P47914(RPL29)	P24539(ATP5F1)	Q9BRJ2(MRPL45)	P47914(RPL29)	P47914(RPL29)
	Q86V81(THOC4)	Q86V81(THOC4)							P24347(MMP11)				P11940(PABPC1)		P11940(PABPC1)	P23497(SP100)		P17317(H2AFZ)	P11940(PABPC1)	P47914(RPL29)		Q9HD33(MRPL47)	P47914(RPL29)				Q12996(CSTF3)	Q9Y6G3(MRPL42)	P23396(RPS3)					Q92552(MRPS27)	P17317(H2AFZ)	P22087(FBL)	P22087(FBL)		P22087(FBL)	P22087(FBL)	P39687(ANP32A)	P52597(HNRNPF)	P31948(STIP1)	Q9BYC8(MRPL32)	P49736(MCM2)	P49736(MCM2)
	Q92499(DDX1)	Q92499(DDX1)							P38646(HSPA9)				P13995(MTHFD2)		P13995(MTHFD2)	P24539(ATP5F1)		P18754(RCC1)	P13995(MTHFD2)	Q15056(EIF4H)		Q9P2J5(LARS)	Q15056(EIF4H)				Q14103(HNRNPD)		P23497(SP100)					Q9BRJ2(MRPL45)	P18754(RCC1)	P23497(SP100)	P23497(SP100)		P22090(RPS4Y1)	P22090(RPS4Y1)	P40937(RFC5)	P55060(CSE1L)	P38646(HSPA9)	Q9BYN8(MRPS26)	Q13185(CBX3)	Q13185(CBX3)
	Q96SB4(SRPK1)	Q96SB4(SRPK1)							P40937(RFC5)				P15954(COX7C)		P15954(COX7C)	P40937(RFC5)		P22087(FBL)	P15954(COX7C)	Q92499(DDX1)		Q9Y6G3(MRPL42)	Q92499(DDX1)				Q15056(EIF4H)		P40937(RFC5)					Q9BYC8(MRPL32)	P19338(NCL)	P24539(ATP5F1)	P24539(ATP5F1)		P23396(RPS3)	P23396(RPS3)	P46087(NOP2)	Q01081(U2AF1)	P39687(ANP32A)	Q9HD33(MRPL47)	Q13428(TCOF1)	Q13428(TCOF1)
	Q9NY12(GAR1)	Q9NY12(GAR1)							P46777(RPL5)				P17317(H2AFZ)		P17317(H2AFZ)	P49247(RPIA)		P22090(RPS4Y1)	P17317(H2AFZ)	Q9BPZ3()			Q9BPZ3()				Q15393(SF3B3)		P46777(RPL5)					Q9BYN8(MRPS26)	P22087(FBL)	P31948(STIP1)	P31948(STIP1)		P23497(SP100)	P23497(SP100)	P49736(MCM2)	Q14103(HNRNPD)	P46777(RPL5)	Q9Y3D9(MRPS23)	Q14103(HNRNPD)	Q14103(HNRNPD)
	Q9Y2X3(NOP58)	Q9P2J5(LARS)							P47914(RPL29)				P18754(RCC1)		P18754(RCC1)	P49736(MCM2)		P22102(GART)	P18754(RCC1)	Q9BRJ2(MRPL45)			Q9BRJ2(MRPL45)				Q16629(SFRS7)		P47914(RPL29)					Q9HD33(MRPL47)	P22090(RPS4Y1)	P38646(HSPA9)	P38646(HSPA9)		P24539(ATP5F1)	P24539(ATP5F1)	P52434(POLR2H)	Q15056(EIF4H)	P47914(RPL29)	Q9Y5L4(TIMM13)	Q14978(NOLC1)	Q14978(NOLC1)
	Q9Y333(LSM2)	Q9Y2X3(NOP58)							P48643(CCT5)				P22087(FBL)		P22087(FBL)	P52434(POLR2H)		P22234(PAICS)	P22087(FBL)	Q9BZX2(UCK2)			Q9HD33(MRPL47)				Q86V81(THOC4)		P49736(MCM2)					Q9NY12(GAR1)	P22102(GART)	P39687(ANP32A)	P39687(ANP32A)		P31948(STIP1)	P31948(STIP1)	P52597(HNRNPF)	Q15329(E2F5)	P50897(PPT1)	Q9Y6G3(MRPL42)	Q9HD33(MRPL47)	Q9HD33(MRPL47)
	Q9Y3A2(UTP11L)	Q9Y333(LSM2)							P49247(RPIA)				P22090(RPS4Y1)		P22090(RPS4Y1)	P52597(HNRNPF)		P23396(RPS3)	P22090(RPS4Y1)	Q9HD33(MRPL47)			Q9P2J5(LARS)				Q8NC51(SERBP1)		P52434(POLR2H)					Q9Y333(LSM2)	P23396(RPS3)	P40937(RFC5)	P40937(RFC5)		P38646(HSPA9)	P38646(HSPA9)	P54105(CLNS1A)	Q15393(SF3B3)	P50990(CCT8)		Q9NY12(GAR1)	Q9NY12(GAR1)
	Q9Y4Y9(LSM5)	Q9Y3A2(UTP11L)							P49736(MCM2)				P22102(GART)		P22102(GART)	P54198(HIRA)		P23497(SP100)	P22102(GART)	Q9P2J5(LARS)			Q9Y617(PSAT1)				Q92499(DDX1)		P52597(HNRNPF)					Q9Y3A2(UTP11L)	P23497(SP100)	P46087(NOP2)	P46087(NOP2)		P39687(ANP32A)	P39687(ANP32A)	P54198(HIRA)	Q86V81(THOC4)	P55060(CSE1L)		Q9Y2X3(NOP58)	Q9Y2X3(NOP58)
		Q9Y4Y9(LSM5)							P50897(PPT1)				P22234(PAICS)		P22234(PAICS)	Q01081(U2AF1)		P24347(MMP11)	P22234(PAICS)	Q9UJA2(CRLS1)			Q9Y6G3(MRPL42)				Q9NY12(GAR1)		P54198(HIRA)					Q9Y3D9(MRPS23)	P23526(AHCY)	P49736(MCM2)	P49736(MCM2)		P40937(RFC5)	P40937(RFC5)	P55060(CSE1L)	Q92552(MRPS27)	Q01469(FABP5)		Q9Y333(LSM2)	Q9Y333(LSM2)
									P50990(CCT8)				P23396(RPS3)		P23396(RPS3)	Q04837(SSBP1)		P24539(ATP5F1)	P23396(RPS3)	Q9Y617(PSAT1)							Q9Y333(LSM2)		Q01081(U2AF1)					Q9Y4Y9(LSM5)	P24539(ATP5F1)	P50897(PPT1)	P50897(PPT1)		P46087(NOP2)	P46087(NOP2)	Q01081(U2AF1)	Q9BRJ2(MRPL45)	Q04837(SSBP1)		Q9Y4Y9(LSM5)	Q9Y4Y9(LSM5)
									P52597(HNRNPF)				P23497(SP100)		P23497(SP100)	Q12996(CSTF3)		P38646(HSPA9)	P23497(SP100)	Q9Y6G3(MRPL42)							Q9Y4Y9(LSM5)		Q04837(SSBP1)					Q9Y6G3(MRPL42)	P31948(STIP1)	P52434(POLR2H)	P52434(POLR2H)		P46777(RPL5)	P46777(RPL5)	Q05923(DUSP2)	Q9BYC8(MRPL32)	Q13867(BLMH)		Q9Y6G3(MRPL42)	Q9Y6G3(MRPL42)
									Q00796(SORD)				P23526(AHCY)		P23526(AHCY)	Q13185(CBX3)		P40937(RFC5)	P23526(AHCY)										Q12996(CSTF3)						P38646(HSPA9)	P52597(HNRNPF)	P52597(HNRNPF)		P47914(RPL29)	P47914(RPL29)	Q12996(CSTF3)	Q9BYN8(MRPS26)	Q14978(NOLC1)
									Q01081(U2AF1)				P24347(MMP11)		P24347(MMP11)	Q14103(HNRNPD)		P46777(RPL5)	P24347(MMP11)										Q14103(HNRNPD)						P39687(ANP32A)	P54105(CLNS1A)	P54105(CLNS1A)		P49736(MCM2)	P49736(MCM2)	Q13185(CBX3)	Q9HD33(MRPL47)	Q15056(EIF4H)
									Q04837(SSBP1)				P24539(ATP5F1)		P24539(ATP5F1)	Q14137(BOP1)		P47914(RPL29)	P24539(ATP5F1)										Q14469(HES1)						P40937(RFC5)	P54198(HIRA)	P54198(HIRA)		P50897(PPT1)	P50897(PPT1)	Q13428(TCOF1)	Q9NY12(GAR1)	Q15181(PPA1)
									Q05923(DUSP2)				P38646(HSPA9)		P38646(HSPA9)	Q14469(HES1)		P48643(CCT5)	P38646(HSPA9)										Q14566(MCM6)						P46087(NOP2)	P55060(CSE1L)	P55060(CSE1L)		P52434(POLR2H)	P52434(POLR2H)	Q13867(BLMH)	Q9UHV9(PFDN2)	Q16342(PDCD2)
									Q12996(CSTF3)				P40937(RFC5)		P40937(RFC5)	Q14566(MCM6)		P49247(RPIA)	P39687(ANP32A)										Q14739(LBR)						P46777(RPL5)	Q01081(U2AF1)	Q01081(U2AF1)		P52597(HNRNPF)	P52597(HNRNPF)	Q14103(HNRNPD)	Q9Y265(RUVBL1)	Q16678(CYP1B1)
									Q13185(CBX3)				P46777(RPL5)		P46777(RPL5)	Q14978(NOLC1)		P49736(MCM2)	P40937(RFC5)										Q15032(R3HDM1)						P47914(RPL29)	Q04837(SSBP1)	Q04837(SSBP1)		P54105(CLNS1A)	P54105(CLNS1A)	Q14137(BOP1)	Q9Y333(LSM2)	Q8NES3(LFNG)
									Q13867(BLMH)				P47914(RPL29)		P47914(RPL29)	Q15329(E2F5)		P50897(PPT1)	P41220(RGS2)										Q15056(EIF4H)						P49247(RPIA)	Q05923(DUSP2)	Q05923(DUSP2)		P54198(HIRA)	P54198(HIRA)	Q14469(HES1)	Q9Y3A2(UTP11L)	Q8NI60(CABC1)
									Q14103(HNRNPD)				P48643(CCT5)		P48643(CCT5)	Q15393(SF3B3)		P50990(CCT8)	P46087(NOP2)										Q15329(E2F5)						P49736(MCM2)	Q12996(CSTF3)	Q12996(CSTF3)		P55060(CSE1L)	P55060(CSE1L)	Q14566(MCM6)	Q9Y3D9(MRPS23)	Q8TAA5(GRPEL2)
									Q14137(BOP1)				P49247(RPIA)		P49247(RPIA)	Q16629(SFRS7)		P52434(POLR2H)	P46777(RPL5)										Q15393(SF3B3)						P50897(PPT1)	Q13185(CBX3)	Q13185(CBX3)		Q01081(U2AF1)	Q01081(U2AF1)	Q14739(LBR)	Q9Y4Y9(LSM5)	Q92552(MRPS27)
									Q14566(MCM6)				P49736(MCM2)		P49736(MCM2)	Q86V81(THOC4)		P52597(HNRNPF)	P47914(RPL29)										Q16342(PDCD2)						P50990(CCT8)	Q13428(TCOF1)	Q13428(TCOF1)		Q04837(SSBP1)	Q04837(SSBP1)	Q14978(NOLC1)	Q9Y5L4(TIMM13)	Q96DA6(DNAJC19)
									Q14978(NOLC1)				P50897(PPT1)		P50897(PPT1)	Q92499(DDX1)		P54198(HIRA)	P48643(CCT5)										Q16629(SFRS7)						P52434(POLR2H)	Q13867(BLMH)	Q13867(BLMH)		Q05923(DUSP2)	Q05923(DUSP2)	Q15329(E2F5)	Q9Y6G3(MRPL42)	Q96SB4(SRPK1)
									Q15056(EIF4H)				P50990(CCT8)		P50990(CCT8)	Q96SB4(SRPK1)		Q00796(SORD)	P49247(RPIA)										Q86V81(THOC4)						P52597(HNRNPF)	Q14103(HNRNPD)	Q14103(HNRNPD)		Q12996(CSTF3)	Q12996(CSTF3)	Q15393(SF3B3)		Q9BPZ3()
									Q15393(SF3B3)				P52434(POLR2H)		P52434(POLR2H)	Q9NY12(GAR1)		Q01081(U2AF1)	P49736(MCM2)										Q8NC51(SERBP1)						P54105(CLNS1A)	Q14137(BOP1)	Q14137(BOP1)		Q13185(CBX3)	Q13185(CBX3)	Q16342(PDCD2)		Q9BRJ2(MRPL45)
									Q16629(SFRS7)				P52597(HNRNPF)		P52597(HNRNPF)	Q9P2J5(LARS)		Q01469(FABP5)	P50897(PPT1)										Q92499(DDX1)						P54198(HIRA)	Q14469(HES1)	Q14469(HES1)		Q13428(TCOF1)	Q13428(TCOF1)	Q16629(SFRS7)		Q9BRP1(PDCD2L)
									Q86V81(THOC4)				P54198(HIRA)		P54198(HIRA)	Q9UFF9(CNOT8)		Q04837(SSBP1)	P50990(CCT8)										Q9NY12(GAR1)						P55060(CSE1L)	Q14566(MCM6)	Q14566(MCM6)		Q13867(BLMH)	Q13867(BLMH)	Q86V81(THOC4)		Q9BY08(EBPL)
									Q8NI60(CABC1)				Q00796(SORD)		Q00796(SORD)	Q9Y265(RUVBL1)		Q05923(DUSP2)	P52434(POLR2H)										Q9UFF9(CNOT8)						Q01081(U2AF1)	Q14739(LBR)	Q14739(LBR)		Q14103(HNRNPD)	Q14103(HNRNPD)	Q8NC51(SERBP1)		Q9BYC8(MRPL32)
									Q8TAA5(GRPEL2)				Q01081(U2AF1)		Q01081(U2AF1)	Q9Y2S0(POLR1D)		Q12996(CSTF3)	P52597(HNRNPF)										Q9Y2S0(POLR1D)						Q01469(FABP5)	Q14978(NOLC1)	Q14978(NOLC1)		Q14137(BOP1)	Q14137(BOP1)	Q96SB4(SRPK1)		Q9BYN8(MRPS26)
									Q92499(DDX1)				Q04837(SSBP1)		Q01469(FABP5)	Q9Y2X3(NOP58)		Q13185(CBX3)	P53985(SLC16A1)										Q9Y333(LSM2)						Q04837(SSBP1)	Q15329(E2F5)	Q15329(E2F5)		Q14469(HES1)	Q14469(HES1)	Q99848(EBNA1BP2)		Q9HD33(MRPL47)
									Q96DA6(DNAJC19)				Q05923(DUSP2)		Q04837(SSBP1)	Q9Y333(LSM2)		Q13867(BLMH)	P54105(CLNS1A)										Q9Y4Y9(LSM5)						Q05923(DUSP2)	Q15393(SF3B3)	Q15393(SF3B3)		Q14566(MCM6)	Q14566(MCM6)	Q9BVJ6(UTP14A)		Q9P2J5(LARS)
									Q96SB4(SRPK1)				Q12996(CSTF3)		Q05923(DUSP2)	Q9Y3A2(UTP11L)		Q14103(HNRNPD)	P54198(HIRA)																Q12996(CSTF3)	Q16342(PDCD2)	Q16342(PDCD2)		Q14739(LBR)	Q14739(LBR)	Q9GZL7(WDR12)		Q9UHV9(PFDN2)
									Q9BPZ3()				Q13185(CBX3)		Q12996(CSTF3)	Q9Y4Y9(LSM5)		Q14137(BOP1)	P55060(CSE1L)																Q13185(CBX3)	Q16629(SFRS7)	Q16629(SFRS7)		Q14978(NOLC1)	Q14978(NOLC1)	Q9NY12(GAR1)		Q9Y3A2(UTP11L)
									Q9BRJ2(MRPL45)				Q13867(BLMH)		Q13185(CBX3)			Q14469(HES1)	Q00796(SORD)																Q13428(TCOF1)	Q16678(CYP1B1)	Q16678(CYP1B1)		Q15329(E2F5)	Q15329(E2F5)	Q9P288(BCCIP)		Q9Y3D9(MRPS23)
									Q9HD33(MRPL47)				Q14103(HNRNPD)		Q13867(BLMH)			Q14566(MCM6)	Q01081(U2AF1)																Q13867(BLMH)	Q86V81(THOC4)	Q86V81(THOC4)		Q15393(SF3B3)	Q15393(SF3B3)	Q9UFF9(CNOT8)		Q9Y5L4(TIMM13)
									Q9NY12(GAR1)				Q14137(BOP1)		Q14103(HNRNPD)			Q14978(NOLC1)	Q01469(FABP5)																Q14103(HNRNPD)	Q8NC51(SERBP1)	Q8NC51(SERBP1)		Q16342(PDCD2)	Q16342(PDCD2)	Q9Y265(RUVBL1)		Q9Y6G3(MRPL42)
									Q9NYY3(PLK2)				Q14469(HES1)		Q14137(BOP1)			Q15056(EIF4H)	Q04837(SSBP1)																Q14137(BOP1)	Q8NES3(LFNG)	Q8NES3(LFNG)		Q16629(SFRS7)	Q16629(SFRS7)	Q9Y2S0(POLR1D)
									Q9P0X2(HSPA14)				Q14566(MCM6)		Q14469(HES1)			Q15329(E2F5)	Q05923(DUSP2)																Q14469(HES1)	Q8NI60(CABC1)	Q8NI60(CABC1)		Q16678(CYP1B1)	Q16678(CYP1B1)	Q9Y2X3(NOP58)
									Q9P2J5(LARS)				Q14978(NOLC1)		Q14566(MCM6)			Q15393(SF3B3)	Q12894(IFRD2)																Q14566(MCM6)	Q8TAA5(GRPEL2)	Q8TAA5(GRPEL2)		Q86V81(THOC4)	Q86V81(THOC4)	Q9Y333(LSM2)
									Q9UHV9(PFDN2)				Q15056(EIF4H)		Q14978(NOLC1)			Q16629(SFRS7)	Q12996(CSTF3)																Q14739(LBR)	Q92552(MRPS27)	Q92552(MRPS27)		Q8NC51(SERBP1)	Q8NC51(SERBP1)	Q9Y3A2(UTP11L)
									Q9Y265(RUVBL1)				Q15181(PPA1)		Q15056(EIF4H)			Q86V81(THOC4)	Q13185(CBX3)																Q14978(NOLC1)	Q96DA6(DNAJC19)	Q96DA6(DNAJC19)		Q8NES3(LFNG)	Q8NES3(LFNG)	Q9Y4Y9(LSM5)
									Q9Y2X3(NOP58)				Q15329(E2F5)		Q15181(PPA1)			Q8NI60(CABC1)	Q13428(TCOF1)																Q15056(EIF4H)	Q96SB4(SRPK1)	Q96SB4(SRPK1)		Q8NI60(CABC1)	Q8NI60(CABC1)
									Q9Y333(LSM2)				Q15393(SF3B3)		Q15329(E2F5)			Q8TAA5(GRPEL2)	Q13867(BLMH)																Q15181(PPA1)	Q99848(EBNA1BP2)	Q99848(EBNA1BP2)		Q8TAA5(GRPEL2)	Q8TAA5(GRPEL2)
									Q9Y3A2(UTP11L)				Q16629(SFRS7)		Q15393(SF3B3)			Q92499(DDX1)	Q14103(HNRNPD)																Q15329(E2F5)	Q9BRJ2(MRPL45)	Q9BRJ2(MRPL45)		Q92552(MRPS27)	Q92552(MRPS27)
									Q9Y4Y9(LSM5)				Q16678(CYP1B1)		Q16629(SFRS7)			Q96DA6(DNAJC19)	Q14137(BOP1)																Q15393(SF3B3)	Q9BVJ6(UTP14A)	Q9BVJ6(UTP14A)		Q96DA6(DNAJC19)	Q96DA6(DNAJC19)
									Q9Y6G3(MRPL42)				Q86V81(THOC4)		Q16678(CYP1B1)			Q96SB4(SRPK1)	Q14469(HES1)																Q16342(PDCD2)	Q9BY08(EBPL)	Q9BY08(EBPL)		Q96SB4(SRPK1)	Q96SB4(SRPK1)
													Q8NI60(CABC1)		Q86V81(THOC4)			Q9BPZ3()	Q14566(MCM6)																Q16629(SFRS7)	Q9BYC8(MRPL32)	Q9BYC8(MRPL32)		Q99848(EBNA1BP2)	Q99848(EBNA1BP2)
													Q8TAA5(GRPEL2)		Q8NI60(CABC1)			Q9BRJ2(MRPL45)	Q14978(NOLC1)																Q16678(CYP1B1)	Q9BYN8(MRPS26)	Q9BYN8(MRPS26)		Q9BRJ2(MRPL45)	Q9BRJ2(MRPL45)
													Q92499(DDX1)		Q8TAA5(GRPEL2)			Q9BY08(EBPL)	Q15043(SLC39A14)																Q86V81(THOC4)	Q9GZL7(WDR12)	Q9GZL7(WDR12)		Q9BVJ6(UTP14A)	Q9BVJ6(UTP14A)
													Q96DA6(DNAJC19)		Q92499(DDX1)			Q9HD33(MRPL47)	Q15056(EIF4H)																Q8NC51(SERBP1)	Q9HD33(MRPL47)	Q9HD33(MRPL47)		Q9BY08(EBPL)	Q9BY08(EBPL)
													Q96SB4(SRPK1)		Q96DA6(DNAJC19)			Q9NY12(GAR1)	Q15181(PPA1)																Q8NES3(LFNG)	Q9NY12(GAR1)	Q9NY12(GAR1)		Q9BYC8(MRPL32)	Q9BYC8(MRPL32)
													Q9BPZ3()		Q96SB4(SRPK1)			Q9NYY3(PLK2)	Q15329(E2F5)																Q8NI60(CABC1)	Q9P288(BCCIP)	Q9P288(BCCIP)		Q9BYN8(MRPS26)	Q9BYN8(MRPS26)
													Q9BRJ2(MRPL45)		Q9BPZ3()			Q9P0X2(HSPA14)	Q15393(SF3B3)																Q8TAA5(GRPEL2)	Q9UFF9(CNOT8)	Q9UFF9(CNOT8)		Q9GZL7(WDR12)	Q9GZL7(WDR12)
													Q9BY08(EBPL)		Q9BRJ2(MRPL45)			Q9P2J5(LARS)	Q16342(PDCD2)																Q92552(MRPS27)	Q9Y265(RUVBL1)	Q9Y265(RUVBL1)		Q9HD33(MRPL47)	Q9HD33(MRPL47)
													Q9HD33(MRPL47)		Q9BY08(EBPL)			Q9UFF9(CNOT8)	Q16629(SFRS7)																Q96DA6(DNAJC19)	Q9Y2S0(POLR1D)	Q9Y2S0(POLR1D)		Q9NY12(GAR1)	Q9NY12(GAR1)
													Q9NY12(GAR1)		Q9BZX2(UCK2)			Q9UHV9(PFDN2)	Q16678(CYP1B1)																Q96SB4(SRPK1)	Q9Y2X3(NOP58)	Q9Y2X3(NOP58)		Q9P288(BCCIP)	Q9P288(BCCIP)
													Q9NYY3(PLK2)		Q9HD33(MRPL47)			Q9UJA2(CRLS1)	Q86V81(THOC4)																Q99848(EBNA1BP2)	Q9Y333(LSM2)	Q9Y333(LSM2)		Q9UFF9(CNOT8)	Q9UFF9(CNOT8)
													Q9P0X2(HSPA14)		Q9NY12(GAR1)			Q9Y265(RUVBL1)	Q8NDM4(TBRG4)																Q9BPZ3()	Q9Y3A2(UTP11L)	Q9Y3A2(UTP11L)		Q9Y265(RUVBL1)	Q9Y265(RUVBL1)
													Q9P2J5(LARS)		Q9NYY3(PLK2)			Q9Y2S0(POLR1D)	Q8NI60(CABC1)																Q9BRJ2(MRPL45)	Q9Y3D9(MRPS23)	Q9Y3D9(MRPS23)		Q9Y2S0(POLR1D)	Q9Y2S0(POLR1D)
													Q9UFF9(CNOT8)		Q9P0X2(HSPA14)			Q9Y2X3(NOP58)	Q8TAA5(GRPEL2)																Q9BRP1(PDCD2L)	Q9Y4Y9(LSM5)	Q9Y4Y9(LSM5)		Q9Y2X3(NOP58)	Q9Y2X3(NOP58)
													Q9UHV9(PFDN2)		Q9P2J5(LARS)			Q9Y333(LSM2)	Q92499(DDX1)																Q9BVJ6(UTP14A)	Q9Y5L4(TIMM13)	Q9Y5L4(TIMM13)		Q9Y333(LSM2)	Q9Y333(LSM2)
													Q9UJA2(CRLS1)		Q9UFF9(CNOT8)			Q9Y3A2(UTP11L)	Q96BD0(SLCO4A1)																Q9BY08(EBPL)	Q9Y6G3(MRPL42)	Q9Y6G3(MRPL42)		Q9Y3A2(UTP11L)	Q9Y3A2(UTP11L)
													Q9Y265(RUVBL1)		Q9UHV9(PFDN2)			Q9Y4Y9(LSM5)	Q96DA6(DNAJC19)																Q9BYC8(MRPL32)				Q9Y3D9(MRPS23)	Q9Y3D9(MRPS23)
													Q9Y2S0(POLR1D)		Q9UJA2(CRLS1)			Q9Y617(PSAT1)	Q96EE3(SEH1L)																Q9BYN8(MRPS26)				Q9Y4Y9(LSM5)	Q9Y4Y9(LSM5)
													Q9Y2X3(NOP58)		Q9Y265(RUVBL1)			Q9Y6G3(MRPL42)	Q96SB4(SRPK1)																Q9GZL7(WDR12)				Q9Y5L4(TIMM13)	Q9Y5L4(TIMM13)
													Q9Y333(LSM2)		Q9Y2S0(POLR1D)				Q99848(EBNA1BP2)																Q9HD33(MRPL47)				Q9Y6G3(MRPL42)	Q9Y6G3(MRPL42)
													Q9Y3A2(UTP11L)		Q9Y2X3(NOP58)				Q9BPZ3()																Q9NY12(GAR1)
													Q9Y4Y9(LSM5)		Q9Y333(LSM2)				Q9BRJ2(MRPL45)																Q9P288(BCCIP)
													Q9Y617(PSAT1)		Q9Y3A2(UTP11L)				Q9BRP1(PDCD2L)																Q9P2J5(LARS)
													Q9Y6G3(MRPL42)		Q9Y4Y9(LSM5)				Q9BVJ6(UTP14A)																Q9UFF9(CNOT8)
															Q9Y617(PSAT1)				Q9BY08(EBPL)																Q9UHV9(PFDN2)
															Q9Y6G3(MRPL42)				Q9HD33(MRPL47)																Q9Y265(RUVBL1)
																			Q9NY12(GAR1)																Q9Y2S0(POLR1D)
																			Q9NYY3(PLK2)																Q9Y2X3(NOP58)
																			Q9P0X2(HSPA14)																Q9Y333(LSM2)
																			Q9P288(BCCIP)																Q9Y3A2(UTP11L)
																			Q9P2J5(LARS)																Q9Y3D9(MRPS23)
																			Q9UFF9(CNOT8)																Q9Y4Y9(LSM5)
																			Q9UHV9(PFDN2)																Q9Y5L4(TIMM13)
																			Q9UJA2(CRLS1)																Q9Y6G3(MRPL42)
																			Q9Y265(RUVBL1)
																			Q9Y289(SLC5A6)
																			Q9Y2S0(POLR1D)
																			Q9Y2X3(NOP58)
																			Q9Y333(LSM2)
																			Q9Y3A2(UTP11L)
																			Q9Y4Y9(LSM5)
																			Q9Y5L4(TIMM13)
																			Q9Y617(PSAT1)
																			Q9Y6G3(MRPL42)
