# Supplementary material for: A Core MYC Gene Expression Signature Is Prominent in Basal-Like Breast Cancer but Only Partially Overlaps the Core Serum Response
Source: PLoS One. 2009 Aug 19;4(8):e6693. doi: 10.1371/journal.pone.0006693 (PMC2723908; doi:10.1371/journal.pone.0006693)
Supplement: Table S3 — Comparison on MYC responsive gene identified in this study to the MYC target gene database. (0.26 MB XLS) [file pone.0006693.s006.xls]

## Sheet: dang_locuslink_ugene
Unique unigene (build 219) in Dang database that are on Agilent array	Timecourse unique Unigenes	Steady state unique Unigenes	Myc Signature unique Unigenes			In A and B unique		In A and C unique		In A,B and C unique		In B and C unique
Hs.100915|PEX16	Hs.101302|COL12A1	Hs.100915|PEX16	Hs.102267|LOX			Unigene	Annotation	Unigene	Annotation	Unigene	Annotation	Unigene Annotation				A= Myc Target Gene database
Hs.100921|ZNF193	Hs.102267|LOX	Hs.101840|MR1	Hs.103106|LSM2			Hs.102267	LOX||Lysyl oxidase	Hs.100915	PEX16||Peroxisomal biogenesis factor 16	Hs.102267	LOX||Lysyl oxidase	Hs.102267	LOX||Lysyl oxidase			B= MYCN-ER responsive genes
Hs.101337|UCP3	Hs.10306|NKG7	Hs.1019|PTH1R	Hs.105465|SNRPF			Hs.103755	RIPK2||Receptor-interacting serine-threonine kinase 2	Hs.102267	LOX||Lysyl oxidase	Hs.105642	GNB1L||Guanine nucleotide binding protein (G protein), beta polypeptide 1-like	Hs.103106	LSM2||LSM2 homolog, U6 small nuclear RNA associated (S. cerevisiae)			C= MYCN responsive genes
Hs.102267|LOX	Hs.103106|LSM2	Hs.102267|LOX	Hs.105642|GNB1L			Hs.105642	GNB1L||Guanine nucleotide binding protein (G protein), beta polypeptide 1-like	Hs.105642	GNB1L||Guanine nucleotide binding protein (G protein), beta polypeptide 1-like	Hs.10842	RAN||RAN, member RAS oncogene family	Hs.105465	SNRPF||Small nuclear ribonucleoprotein polypeptide F
Hs.102798|PSMA1	Hs.103291|NRN1	Hs.1027|RRAD	Hs.106601|KLHL8			Hs.105818	PPP2CA||Protein phosphatase 2 (formerly 2A), catalytic subunit, alpha isoform	Hs.108112	POLE3||Polymerase (DNA directed), epsilon 3 (p17 subunit)	Hs.110849	ESRRA||Estrogen-related receptor alpha	Hs.105642	GNB1L||Guanine nucleotide binding protein (G protein), beta polypeptide 1-like
Hs.103755|RIPK2	Hs.103755|RIPK2	Hs.103106|LSM2	Hs.108080|CSRP1			Hs.10842	RAN||RAN, member RAS oncogene family	Hs.10842	RAN||RAN, member RAS oncogene family	Hs.1183	DUSP2||Dual specificity phosphatase 2	Hs.106601	KLHL8||Kelch-like 8 (Drosophila)
Hs.104320|GOLGA5	Hs.103832|UPF3B	Hs.103147|SPATA20	Hs.10842|RAN			Hs.110757	RRP1||Ribosomal RNA processing 1 homolog (S. cerevisiae)	Hs.110849	ESRRA||Estrogen-related receptor alpha	Hs.119192	H2AFZ||H2A histone family, member Z	Hs.108080	CSRP1||Cysteine and glycine-rich protein 1			In A and B	255
Hs.105642|GNB1L	Hs.104672|FILIP1L	Hs.103934|FKBP9	Hs.109051|SH3BGRL3			Hs.110849	ESRRA||Estrogen-related receptor alpha	Hs.11615	STYXL1||Serine/threonine/tyrosine interacting-like 1	Hs.1197	HSPE1||Heat shock 10kDa protein 1 (chaperonin 10)	Hs.10842	RAN||RAN, member RAS oncogene family			In A and C	265
Hs.105818|PPP2CA	Hs.104925|ENC1	Hs.104741|PBK	Hs.110849|ESRRA			Hs.111779	SPARC||Secreted protein, acidic, cysteine-rich (osteonectin)	Hs.118076	RPS4X||Ribosomal protein S4, X-linked	Hs.125113	CCT8||Chaperonin containing TCP1, subunit 8 (theta)	Hs.109051	SH3BGRL3||SH3 domain binding glutamic acid-rich protein like 3			In A,B and C	101
Hs.105940|JRKL	Hs.105465|SNRPF	Hs.105465|SNRPF	Hs.116448|GLS			Hs.114286	CD9||CD9 molecule	Hs.1183	DUSP2||Dual specificity phosphatase 2	Hs.13225	B4GALT4||UDP-Gal:betaGlcNAc beta 1,4- galactosyltransferase, polypeptide 4	Hs.110849	ESRRA||Estrogen-related receptor alpha			In B and C	398
Hs.1063|SNRPC	Hs.105642|GNB1L	Hs.105642|GNB1L	Hs.116471|CDH11			Hs.115242	DRG1||Developmentally regulated GTP binding protein 1	Hs.119192	H2AFZ||H2A histone family, member Z	Hs.133397	ITGA6||Integrin, alpha 6	Hs.116448	GLS||Glutaminase
Hs.107911|ABCB6	Hs.105818|PPP2CA	Hs.105924|DEFB4	Hs.118241|CABC1			Hs.11590	CTSF||Cathepsin F	Hs.119598	RPL3||Ribosomal protein L3	Hs.151777	EIF2S1||Eukaryotic translation initiation factor 2, subunit 1 alpha, 35kDa	Hs.116471	CDH11||Cadherin 11, type 2, OB-cadherin (osteoblast)
Hs.108112|POLE3	Hs.106601|KLHL8	Hs.105932|SHOX	Hs.1183|DUSP2			Hs.1183	DUSP2||Dual specificity phosphatase 2	Hs.1197	HSPE1||Heat shock 10kDa protein 1 (chaperonin 10)	Hs.154495	ACHE||Acetylcholinesterase (Yt blood group)	Hs.118241	CABC1||Chaperone, ABC1 activity of bc1 complex homolog (S. pombe)
Hs.10842|RAN	Hs.106650|TMEM70	Hs.106212|HNRNPU	Hs.119192|H2AFZ			Hs.119192	H2AFZ||H2A histone family, member Z	Hs.12013	ABCE1||ATP-binding cassette, sub-family E (OABP), member 1	Hs.1600	CCT5||Chaperonin containing TCP1, subunit 5 (epsilon)	Hs.1183	DUSP2||Dual specificity phosphatase 2
Hs.108973|DPM2	Hs.106880|BYSL	Hs.106469|SUPV3L1	Hs.1197|HSPE1			Hs.1197	HSPE1||Heat shock 10kDa protein 1 (chaperonin 10)	Hs.125113	CCT8||Chaperonin containing TCP1, subunit 8 (theta)	Hs.171695	DUSP1||Dual specificity phosphatase 1	Hs.119192	H2AFZ||H2A histone family, member Z
Hs.109752|C6orf108	Hs.10784|FAM46A	Hs.106601|KLHL8	Hs.121028|ASPM			Hs.120766	ZNF330||Zinc finger protein 330	Hs.128791	TRMT6||TRNA methyltransferase 6 homolog (S. cerevisiae)	Hs.177766	PARP1||Poly (ADP-ribose) polymerase 1	Hs.1197	HSPE1||Heat shock 10kDa protein 1 (chaperonin 10)
Hs.109760|NDUFB3	Hs.108002|SNAP29	Hs.107003|CCNB1IP1	Hs.123072|RAB3B			Hs.12109	CIAO1||Cytosolic iron-sulfur protein assembly 1 homolog (S. cerevisiae)	Hs.13225	B4GALT4||UDP-Gal:betaGlcNAc beta 1,4- galactosyltransferase, polypeptide 4	Hs.184233	HSPA9||Heat shock 70kDa protein 9 (mortalin)	Hs.121028	ASPM||Asp (abnormal spindle) homolog, microcephaly associated (Drosophila)
Hs.110757|RRP1	Hs.108049|UACA	Hs.108080|CSRP1	Hs.124246|C10orf119			Hs.125113	CCT8||Chaperonin containing TCP1, subunit 8 (theta)	Hs.133397	ITGA6||Integrin, alpha 6	Hs.250666	HES1||Hairy and enhancer of split 1, (Drosophila)	Hs.123072	RAB3B||RAB3B, member RAS oncogene family
Hs.110839|ZKSCAN5	Hs.108080|CSRP1	Hs.108106|UHRF1	Hs.125113|CCT8			Hs.130491	MAP4K5||Mitogen-activated protein kinase kinase kinase kinase 5	Hs.135406	CEBPZ||CCAAT/enhancer binding protein (C/EBP), zeta	Hs.269512	FSTL1||Follistatin-like 1	Hs.124246	C10orf119||Chromosome 10 open reading frame 119
Hs.110849|ESRRA	Hs.10842|RAN	Hs.108112|POLE3	Hs.126667|LPAR1			Hs.13225	B4GALT4||UDP-Gal:betaGlcNAc beta 1,4- galactosyltransferase, polypeptide 4	Hs.1437	GAA||Glucosidase, alpha; acid	Hs.274772	RSL24D1||Ribosomal L24 domain containing 1	Hs.125113	CCT8||Chaperonin containing TCP1, subunit 8 (theta)
Hs.111|FGF9	Hs.109051|SH3BGRL3	Hs.108332|UBE2D2	Hs.129910|HYAL3			Hs.132584	PDE4C||Phosphodiesterase 4C, cAMP-specific (phosphodiesterase E1 dunce homolog, Drosophila)	Hs.147433	PCNA||Proliferating cell nuclear antigen	Hs.278959	GAL||Galanin prepropeptide	Hs.126667	LPAR1||Lysophosphatidic acid receptor 1
Hs.111779|SPARC	Hs.110364|PPIC	Hs.10842|RAN	Hs.129944|ESM1			Hs.13291	CCNG2||Cyclin G2	Hs.151777	EIF2S1||Eukaryotic translation initiation factor 2, subunit 1 alpha, 35kDa	Hs.282387	POLR3G||Polymerase (RNA) III (DNA directed) polypeptide G (32kD)	Hs.129910	HYAL3||Hyaluronoglucosaminidase 3
Hs.111903|FCGRT	Hs.110695|SF3B5	Hs.10862|AK3L1	Hs.131226|BNIP3L			Hs.133397	ITGA6||Integrin, alpha 6	Hs.151787	EFTUD2||Elongation factor Tu GTP binding domain containing 2	Hs.299002	FBL||Fibrillarin	Hs.129944	ESM1||Endothelial cell-specific molecule 1
Hs.112667|DNAI1	Hs.110757|RRP1	Hs.109051|SH3BGRL3	Hs.13225|B4GALT4			Hs.134623	RNF7||Ring finger protein 7	Hs.154495	ACHE||Acetylcholinesterase (Yt blood group)	Hs.306123	MAGEF1||Melanoma antigen family F, 1	Hs.131226	BNIP3L||BCL2/adenovirus E1B 19kDa interacting protein 3-like
Hs.11392|FIGF	Hs.110849|ESRRA	Hs.109999|ITGB1BP2	Hs.132902|CAP2			Hs.141125	CASP3||Caspase 3, apoptosis-related cysteine peptidase	Hs.15535	RPL11||Ribosomal protein L11	Hs.309090	SFRS7||Splicing factor, arginine/serine-rich 7, 35kDa	Hs.13225	B4GALT4||UDP-Gal:betaGlcNAc beta 1,4- galactosyltransferase, polypeptide 4
Hs.114286|CD9	Hs.111779|SPARC	Hs.110675|APOC1	Hs.133397|ITGA6			Hs.146393	HERPUD1||Homocysteine-inducible, endoplasmic reticulum stress-inducible, ubiquitin-like domain member 1	Hs.156367	RPS29||Ribosomal protein S29	Hs.346868	EBNA1BP2||EBNA1 binding protein 2	Hs.132902	CAP2||CAP, adenylate cyclase-associated protein, 2 (yeast)
Hs.115242|DRG1	Hs.11417|RABAC1	Hs.110849|ESRRA	Hs.133892|TPM1			Hs.150136	MAPK7||Mitogen-activated protein kinase 7	Hs.1600	CCT5||Chaperonin containing TCP1, subunit 5 (epsilon)	Hs.356873	RBM8A||RNA binding motif protein 8A	Hs.133397	ITGA6||Integrin, alpha 6
Hs.115830|HS3ST2	Hs.114286|CD9	Hs.111801|SRRT	Hs.133892|TPM1			Hs.151777	EIF2S1||Eukaryotic translation initiation factor 2, subunit 1 alpha, 35kDa	Hs.1706	IRF9||Interferon regulatory factor 9	Hs.365116	U2AF1||U2 small nuclear RNA auxiliary factor 1	Hs.133892	TPM1||Tropomyosin 1 (alpha)
Hs.11590|CTSF	Hs.114412|TXNL1	Hs.112242|C15orf48	Hs.143250|TNC			Hs.154495	ACHE||Acetylcholinesterase (Yt blood group)	Hs.171695	DUSP1||Dual specificity phosphatase 1	Hs.371914	BLMH||Bleomycin hydrolase	Hs.134296	DLC1||Deleted in liver cancer 1
Hs.11615|STYXL1	Hs.115232|SF3A2	Hs.112761|RNASE11	Hs.143751|MMP11			Hs.1600	CCT5||Chaperonin containing TCP1, subunit 5 (epsilon)	Hs.17631	FZD5||Frizzled homolog 5 (Drosophila)	Hs.376064	NOP56||NOP56 ribonucleoprotein homolog (yeast)	Hs.143250	TNC||Tenascin C
Hs.116459|MAN2A2	Hs.115242|DRG1	Hs.11355|TMPO	Hs.144304|COQ2			Hs.163451	PYCR1||Pyrroline-5-carboxylate reductase 1	Hs.177766	PARP1||Poly (ADP-ribose) polymerase 1	Hs.381189	CBX3||Chromobox homolog 3 (HP1 gamma homolog, Drosophila)	Hs.143751	MMP11||Matrix metallopeptidase 11 (stromelysin 3)
Hs.118076|RPS4X	Hs.115263|EREG	Hs.113874|OMG	Hs.150458|RPUSD4			Hs.164226	THBS1||Thrombospondin 1	Hs.179565	MCM3||Minichromosome maintenance complex component 3	Hs.388004	AHCY||S-adenosylhomocysteine hydrolase	Hs.144304	COQ2||Coenzyme Q2 homolog, prenyltransferase (yeast)
Hs.1183|DUSP2	Hs.115284|ZNF213	Hs.114084|ENPP7	Hs.151220|PALLD			Hs.171695	DUSP1||Dual specificity phosphatase 1	Hs.179718	MYBL2||V-myb myeloblastosis viral oncogene homolog (avian)-like 2	Hs.414795	SERPINE1||Serpin peptidase inhibitor, clade E (nexin, plasminogen activator inhibitor type 1), member 1	Hs.150458	RPUSD4||RNA pseudouridylate synthase domain containing 4
Hs.118738|RBM15B	Hs.11590|CTSF	Hs.115325|RAB7L1	Hs.151777|EIF2S1			Hs.173162	COX4NB||COX4 neighbor	Hs.182825	RPL35||Ribosomal protein L35	Hs.430075	COX7C||Cytochrome c oxidase subunit VIIc	Hs.151220	PALLD||Palladin, cytoskeletal associated protein
Hs.119192|H2AFZ	Hs.116448|GLS	Hs.115474|RFC3	Hs.154210|S1PR1			Hs.175905	AUH||AU RNA binding protein/enoyl-Coenzyme A hydratase	Hs.184233	HSPA9||Heat shock 70kDa protein 9 (mortalin)	Hs.430733	CLNS1A||Chloride channel, nucleotide-sensitive, 1A	Hs.151777	EIF2S1||Eukaryotic translation initiation factor 2, subunit 1 alpha, 35kDa
Hs.119316|PET112L	Hs.116467|PRAC	Hs.11615|STYXL1	Hs.156346|TOP2A			Hs.177530	ATP5E||ATP synthase, H+ transporting, mitochondrial F1 complex, epsilon subunit	Hs.18426	HRSP12||Heat-responsive protein 12	Hs.432574	POLR2H||Polymerase (RNA) II (DNA directed) polypeptide H	Hs.154210	S1PR1||Sphingosine-1-phosphate receptor 1
Hs.119591|AP2S1	Hs.116471|CDH11	Hs.116448|GLS	Hs.157351|OLA1			Hs.177766	PARP1||Poly (ADP-ribose) polymerase 1	Hs.190622	DDX58||DEAD (Asp-Glu-Ala-Asp) box polypeptide 58	Hs.432674	LARS||Leucyl-tRNA synthetase	Hs.154495	ACHE||Acetylcholinesterase (Yt blood group)
Hs.119598|RPL3	Hs.118241|CABC1	Hs.116471|CDH11	Hs.159142|LFNG			Hs.179312	SNAPC1||Small nuclear RNA activating complex, polypeptide 1, 43kDa	Hs.190968	RPS21||Ribosomal protein S21	Hs.435166	LBR||Lamin B receptor	Hs.156346	TOP2A||Topoisomerase (DNA) II alpha 170kDa
Hs.1197|HSPE1	Hs.1183|DUSP2	Hs.116602|MARS2	Hs.1600|CCT5			Hs.180919	ID2||Inhibitor of DNA binding 2, dominant negative helix-loop-helix protein	Hs.194143	BRCA1||Breast cancer 1, early onset	Hs.435735	SLC5A6||Solute carrier family 5 (sodium-dependent vitamin transporter), member 6	Hs.157351	OLA1||Obg-like ATPase 1
Hs.119882|CDK6	Hs.119192|H2AFZ	Hs.116724|AKR1B10	Hs.162717|HPDL			Hs.184233	HSPA9||Heat shock 70kDa protein 9 (mortalin)	Hs.209945	TDP1||Tyrosyl-DNA phosphodiesterase 1	Hs.440599	DDX1||DEAD (Asp-Glu-Ala-Asp) box polypeptide 1	Hs.159142	LFNG||LFNG O-fucosylpeptide 3-beta-N-acetylglucosaminyltransferase
Hs.12013|ABCE1	Hs.1197|HSPE1	Hs.11729|SLC27A2	Hs.167046|ADORA2B			Hs.18442	ENOPH1||Enolase-phosphatase 1	Hs.209983	STMN1||Stathmin 1/oncoprotein 18	Hs.441047	ADM||Adrenomedullin	Hs.1600	CCT5||Chaperonin containing TCP1, subunit 5 (epsilon)
Hs.12068|CRAT	Hs.120|PRDX6	Hs.118076|RPS4X	Hs.169840|TTK			Hs.198760	NEFH||Neurofilament, heavy polypeptide	Hs.216386	TMEM5||Transmembrane protein 5	Hs.443861	SRPK1||SFRS protein kinase 1	Hs.162717	HPDL||4-hydroxyphenylpyruvate dioxygenase-like
Hs.120766|ZNF330	Hs.120323|LOC26010	Hs.118241|CABC1	Hs.171695|DUSP1			Hs.200600	SCAMP3||Secretory carrier membrane protein 3	Hs.21765	FADS3||Fatty acid desaturase 3	Hs.44402	CSTF3||Cleavage stimulation factor, 3' pre-RNA, subunit 3, 77kDa	Hs.167046	ADORA2B||Adenosine A2b receptor
Hs.12102|SNX3	Hs.120766|ZNF330	Hs.118243|DNASE2	Hs.177766|PARP1			Hs.201978	PTGS1||Prostaglandin-endoperoxide synthase 1 (prostaglandin G/H synthase and cyclooxygenase)	Hs.223141	DDX21||DEAD (Asp-Glu-Ala-Asp) box polypeptide 21	Hs.444118	MCM6||Minichromosome maintenance complex component 6	Hs.169840	TTK||TTK protein kinase
Hs.12109|CIAO1	Hs.121028|ASPM	Hs.1183|DUSP2	Hs.180591|NUP35			Hs.203717	FN1||Fibronectin 1	Hs.23960	CCNB1||Cyclin B1	Hs.444986	METAP2||Methionyl aminopeptidase 2	Hs.171695	DUSP1||Dual specificity phosphatase 1
Hs.1211|ACP5	Hs.12109|CIAO1	Hs.118513|MRGPRF	Hs.184233|HSPA9			Hs.2057	UMPS||Uridine monophosphate synthetase	Hs.240	KIF20B||Kinesin family member 20B	Hs.446149	LDHB||Lactate dehydrogenase B	Hs.177766	PARP1||Poly (ADP-ribose) polymerase 1
Hs.121489|CST5	Hs.121432|PPWD1	Hs.118552|TMEM132A	Hs.189445|MATN2			Hs.232375	ACAT1||Acetyl-Coenzyme A acetyltransferase 1	Hs.249718	EIF4E||Eukaryotic translation initiation factor 4E	Hs.458360	UCK2||Uridine-cytidine kinase 2	Hs.180591	NUP35||Nucleoporin 35kDa
Hs.12286|ATF7	Hs.121520|AMIGO2	Hs.118631|TIMELESS	Hs.18946|MRPS26			Hs.233240	COL6A3||Collagen, type VI, alpha 3	Hs.250666	HES1||Hairy and enhancer of split 1, (Drosophila)	Hs.459927	PTMA||Prothymosin, alpha	Hs.184233	HSPA9||Heat shock 70kDa protein 9 (mortalin)
Hs.122908|CDT1	Hs.123072|RAB3B	Hs.118651|HHEX	Hs.192221|ELL2			Hs.24763	RANBP1||RAN binding protein 1	Hs.25363	PSEN2||Presenilin 2 (Alzheimer disease 4)	Hs.467701	ODC1||Ornithine decarboxylase 1	Hs.189445	MATN2||Matrilin 2
Hs.124922|LRMP	Hs.123074|GUCY2F	Hs.118820|LOC152217	Hs.195727|CD248			Hs.2490	CASP1||Caspase 1, apoptosis-related cysteine peptidase (interleukin 1, beta, convertase)	Hs.265174	RPL32||Ribosomal protein L32	Hs.469030	MTHFD2||Methylenetetrahydrofolate dehydrogenase (NADP+ dependent) 2, methenyltetrahydrofolate cyclohydrolase	Hs.18946	MRPS26||Mitochondrial ribosomal protein S26
Hs.125113|CCT8	Hs.123253|SHCBP1	Hs.118983|GSDMD	Hs.199579|MRPL42			Hs.25040	ZNF239||Zinc finger protein 239	Hs.269512	FSTL1||Follistatin-like 1	Hs.469264	RPIA||Ribose 5-phosphate isomerase A	Hs.192221	ELL2||Elongation factor, RNA polymerase II, 2
Hs.125898|GNAS	Hs.1239|ANPEP	Hs.119192|H2AFZ	Hs.201034|NTN4			Hs.250666	HES1||Hairy and enhancer of split 1, (Drosophila)	Hs.271791	ATR||Ataxia telangiectasia and Rad3 related	Hs.469723	RCC1||Regulator of chromosome condensation 1	Hs.195727	CD248||CD248 molecule, endosialin
Hs.127799|BIRC3	Hs.124015|HAGHL	Hs.119598|RPL3	Hs.201641|BASP1			Hs.255935	BTG1||B-cell translocation gene 1, anti-proliferative	Hs.272168	SERINC3||Serine incorporator 3	Hs.473648	GART||Phosphoribosylglycinamide formyltransferase, phosphoribosylglycinamide synthetase, phosphoribosylaminoimidazole synthetase	Hs.199579	MRPL42||Mitochondrial ribosomal protein L42
Hs.128065|CTSC	Hs.124246|C10orf119	Hs.1197|HSPE1	Hs.202453|			Hs.26010	PFKP||Phosphofructokinase, platelet	Hs.272630	ATP6V1D||ATPase, H+ transporting, lysosomal 34kDa, V1 subunit D	Hs.473838	PSMG1||Proteasome (prosome, macropain) assembly chaperone 1	Hs.201034	NTN4||Netrin 4
Hs.128791|TRMT6	Hs.124696|BDH2	Hs.119878|MLKL	Hs.203691|DCBLD2			Hs.263812	NUDC||Nuclear distribution gene C homolog (A. nidulans)	Hs.274430	SURF6||Surfeit 6	Hs.477879	H2AFX||H2A histone family, member X	Hs.201641	BASP1||Brain abundant, membrane attached signal protein 1
Hs.128824|OPHN1	Hs.124942|PPP2R3B	Hs.12|CEACAM4	Hs.224008|FEZ1			Hs.264887	FGFR1||Fibroblast growth factor receptor 1	Hs.274531	SKIV2L2||Superkiller viralicidic activity 2-like 2 (S. cerevisiae)	Hs.480073	HNRNPD||Heterogeneous nuclear ribonucleoprotein D (AU-rich element RNA binding protein 1, 37kDa)	Hs.202453	||C-myc-P64 mRNA, initiating from promoter P0, (HLmyc3.1) partial cds
Hs.129133|LMX1B	Hs.125113|CCT8	Hs.12013|ABCE1	Hs.22452|TMEM63C			Hs.269512	FSTL1||Follistatin-like 1	Hs.274772	RSL24D1||Ribosomal L24 domain containing 1	Hs.490203	CALD1||Caldesmon 1	Hs.203691	DCBLD2||Discoidin, CUB and LCCL domain containing 2
Hs.129673|EIF4A1	Hs.125119|NRG3	Hs.12084|TUFM	Hs.224764|CRLS1			Hs.270978	MEST||Mesoderm specific transcript homolog (mouse)	Hs.278959	GAL||Galanin prepropeptide	Hs.491232	SLC39A14||Solute carrier family 39 (zinc transporter), member 14	Hs.224008	FEZ1||Fasciculation and elongation protein zeta 1 (zygin I)
Hs.12970|PSMD3	Hs.126256|IL1B	Hs.121028|ASPM	Hs.224764|CRLS1			Hs.274416	NDUFA6||NADH dehydrogenase (ubiquinone) 1 alpha subcomplex, 6, 14kDa	Hs.282387	POLR3G||Polymerase (RNA) III (DNA directed) polypeptide G (32kD)	Hs.494261	PSAT1||Phosphoserine aminotransferase 1	Hs.22452	TMEM63C||Transmembrane protein 63C
Hs.129966|CNTFR	Hs.126667|LPAR1	Hs.12107|CHMP2A	Hs.230601|DNAJC19			Hs.274772	RSL24D1||Ribosomal L24 domain containing 1	Hs.288034	SLC39A8||Solute carrier family 39 (zinc transporter), member 8	Hs.499839	RPL7A||Ribosomal protein L7a	Hs.224764	CRLS1||Cardiolipin synthase 1
Hs.130491|MAP4K5	Hs.12677|PTRH2	Hs.121260|MINPP1	Hs.231411|TBRG4			Hs.278959	GAL||Galanin prepropeptide	Hs.288658	ZNF35||Zinc finger protein 35	Hs.502182	BDNF||Brain-derived neurotrophic factor	Hs.230601	DNAJC19||DnaJ (Hsp40) homolog, subfamily C, member 19
Hs.130719|ABI3	Hs.127432|DTWD1	Hs.123072|RAB3B	Hs.231761|C14orf104			Hs.280378	SNRPB2||Small nuclear ribonucleoprotein polypeptide B''	Hs.292524	CCNH||Cyclin H	Hs.503315	PRKRIR||Protein-kinase, interferon-inducible double stranded RNA dependent inhibitor, repressor of (P58 repressor)	Hs.231411	TBRG4||Transforming growth factor beta regulator 4
Hs.130746|BLZF1	Hs.128055|OSGIN1	Hs.124165|MRPS30	Hs.235782|SLCO4A1			Hs.282387	POLR3G||Polymerase (RNA) III (DNA directed) polypeptide G (32kD)	Hs.294041	EXOSC8||Exosome component 8	Hs.507584	POLR1D||Polymerase (RNA) I polypeptide D, 16kDa	Hs.231761	C14orf104||Chromosome 14 open reading frame 104
Hs.13225|B4GALT4	Hs.128342|CCT8L2	Hs.124246|C10orf119	Hs.239370|GPSM1			Hs.292579	PTDSS1||Phosphatidylserine synthase 1	Hs.299002	FBL||Fibrillarin	Hs.513803	CYBA||Cytochrome b-245, alpha polypeptide	Hs.235782	SLCO4A1||Solute carrier organic anion transporter family, member 4A1
Hs.132584|PDE4C	Hs.129|CCKAR	Hs.124673|DSEL	Hs.248172|HIST1H4I			Hs.298345	SLBP||Stem-loop binding protein	Hs.303808	C2orf3||Chromosome 2 open reading frame 3	Hs.514870	ATP5F1||ATP synthase, H+ transporting, mitochondrial F0 complex, subunit B1	Hs.239370	GPSM1||G-protein signaling modulator 1 (AGS3-like, C. elegans)
Hs.13291|CCNG2	Hs.129910|HYAL3	Hs.125037|ASB6	Hs.250666|HES1			Hs.299002	FBL||Fibrillarin	Hs.306123	MAGEF1||Melanoma antigen family F, 1	Hs.520943	EIF4H||Eukaryotic translation initiation factor 4H	Hs.24119	NEK7||NIMA (never in mitosis gene a)-related kinase 7
Hs.132966|MET	Hs.129944|ESM1	Hs.125113|CCT8	Hs.252451|SEMA3A			Hs.30345	TRAP1||TNF receptor-associated protein 1	Hs.306791	POLD2||Polymerase (DNA directed), delta 2, regulatory subunit 50kDa	Hs.522891	CXCL12||Chemokine (C-X-C motif) ligand 12 (stromal cell-derived factor 1)	Hs.248172	HIST1H4I||Histone cluster 1, H4i
Hs.132989|POMT2	Hs.130031|TRIO	Hs.125221|TMX1	Hs.25338|PRSS23			Hs.306123	MAGEF1||Melanoma antigen family F, 1	Hs.309090	SFRS7||Splicing factor, arginine/serine-rich 7, 35kDa	Hs.523238	NOLC1||Nucleolar and coiled-body phosphoprotein 1	Hs.250666	HES1||Hairy and enhancer of split 1, (Drosophila)
Hs.133379|TGFB2	Hs.130036|PPM1A	Hs.125474|LPXN	Hs.26703|CNOT8			Hs.309090	SFRS7||Splicing factor, arginine/serine-rich 7, 35kDa	Hs.313544	GNL3||Guanine nucleotide binding protein-like 3 (nucleolar)	Hs.534169	HSPA14||Heat shock 70kDa protein 14	Hs.252451	SEMA3A||Sema domain, immunoglobulin domain (Ig), short basic domain, secreted, (semaphorin) 3A
Hs.133397|ITGA6	Hs.130491|MAP4K5	Hs.126517|CD55	Hs.269512|FSTL1			Hs.309763	GRSF1||G-rich RNA sequence binding factor 1	Hs.316890	SNX5||Sorting nexin 5	Hs.534334	NOP2||NOP2 nucleolar protein homolog (yeast)	Hs.25338	PRSS23||Protease, serine, 23
Hs.13351|LANCL1	Hs.131098|FAM71F1	Hs.126667|LPAR1	Hs.269909|C14orf147			Hs.321541	RAB11A||RAB11A, member RAS oncogene family	Hs.331420	PPAT||Phosphoribosyl pyrophosphate amidotransferase	Hs.535901	BOP1||Block of proliferation 1	Hs.26703	CNOT8||CCR4-NOT transcription complex, subunit 8
Hs.133998|CRIPT	Hs.131226|BNIP3L	Hs.128199|38605	Hs.271695|NOB1			Hs.344400	MPHOSPH6||M-phase phosphoprotein 6	Hs.332708	FBLN5||Fibulin 5	Hs.546286	RPS3||Ribosomal protein S3	Hs.269512	FSTL1||Follistatin-like 1
Hs.134084|M6PR	Hs.131436|FOXP4	Hs.128791|TRMT6	Hs.272822|RUVBL1			Hs.346868	EBNA1BP2||EBNA1 binding protein 2	Hs.334562	CDC2||Cell division cycle 2, G1 to S and G2 to M	Hs.555866	C1QBP||Complement component 1, q subcomponent binding protein	Hs.269909	C14orf147||Chromosome 14 open reading frame 147
Hs.134623|RNF7	Hs.13225|B4GALT4	Hs.129055|ODF2	Hs.272822|RUVBL1			Hs.356502	RPLP1||Ribosomal protein, large, P1	Hs.3352	HDAC2||Histone deacetylase 2	Hs.557550	NPM1||Nucleophosmin (nucleolar phosphoprotein B23, numatrin)	Hs.271695	NOB1||NIN1/RPN12 binding protein 1 homolog (S. cerevisiae)
Hs.134859|MAF	Hs.132584|PDE4C	Hs.129702|BFSP1	Hs.274313|IGFBP6			Hs.356873	RBM8A||RNA binding motif protein 8A	Hs.346868	EBNA1BP2||EBNA1 binding protein 2	Hs.567567	NCAPG||Non-SMC condensin I complex, subunit G	Hs.272822	RUVBL1||RuvB-like 1 (E. coli)
Hs.135406|CEBPZ	Hs.132858|RAP1GDS1	Hs.129910|HYAL3	Hs.274772|RSL24D1			Hs.365116	U2AF1||U2 small nuclear RNA auxiliary factor 1	Hs.35086	USP1||Ubiquitin specific peptidase 1	Hs.591506	MYCBP||C-myc binding protein	Hs.274313	IGFBP6||Insulin-like growth factor binding protein 6
Hs.136348|POSTN	Hs.132902|CAP2	Hs.129944|ESM1	Hs.278573|CD59			Hs.367854	PRMT5||Protein arginine methyltransferase 5	Hs.350966	PTTG1||Pituitary tumor-transforming 1	Hs.591761	HOMER1||Homer homolog 1 (Drosophila)	Hs.274772	RSL24D1||Ribosomal L24 domain containing 1
Hs.1376|HSD11B2	Hs.13291|CCNG2	Hs.130138|	Hs.278959|GAL			Hs.369430	PAM||Peptidylglycine alpha-amidating monooxygenase	Hs.355643	RNPS1||RNA binding protein S1, serine-rich domain	Hs.595072	TOMM22||Translocase of outer mitochondrial membrane 22 homolog (yeast)	Hs.278573	CD59||CD59 molecule, complement regulatory protein
Hs.139896|MAEA	Hs.133397|ITGA6	Hs.130838|MICA	Hs.278959|GAL			Hs.371001	EIF3B||Eukaryotic translation initiation factor 3, subunit B	Hs.356549	SNRPD3||Small nuclear ribonucleoprotein D3 polypeptide 18kDa	Hs.605445	ERRFI1||ERBB receptor feedback inhibitor 1	Hs.278959	GAL||Galanin prepropeptide
Hs.141125|CASP3	Hs.133892|TPM1	Hs.131055|NPM2	Hs.280130|RPS24			Hs.371914	BLMH||Bleomycin hydrolase	Hs.356873	RBM8A||RNA binding motif protein 8A	Hs.62192	F3||Coagulation factor III (thromboplastin, tissue factor)	Hs.280130	RPS24||Ribosomal protein S24
Hs.1420|FGFR3	Hs.134296|DLC1	Hs.131151|PSMD9	Hs.2820|OXTR			Hs.376064	NOP56||NOP56 ribonucleoprotein homolog (yeast)	Hs.363492	DDX18||DEAD (Asp-Glu-Ala-Asp) box polypeptide 18	Hs.624291	BAX||BCL2-associated X protein	Hs.2820	OXTR||Oxytocin receptor
Hs.1437|GAA	Hs.134623|RNF7	Hs.131226|BNIP3L	Hs.282376|RPS4Y1			Hs.381072	PPIF||Peptidylprolyl isomerase F	Hs.365116	U2AF1||U2 small nuclear RNA auxiliary factor 1	Hs.632717	MYL6||Myosin, light chain 6, alkali, smooth muscle and non-muscle	Hs.282376	RPS4Y1||Ribosomal protein S4, Y-linked 1
Hs.144011|CYTH2	Hs.13528|C5orf23	Hs.131776|PGPEP1	Hs.282387|POLR3G			Hs.381189	CBX3||Chromobox homolog 3 (HP1 gamma homolog, Drosophila)	Hs.367842	MKI67IP||MKI67 (FHA domain) interacting nucleolar phosphoprotein	Hs.634680	GPN3||GPN-loop GTPase 3	Hs.282387	POLR3G||Polymerase (RNA) III (DNA directed) polypeptide G (32kD)
Hs.144835|EEF1G	Hs.135763|STIM2	Hs.132049|GPR37L1	Hs.283734|MRPL47			Hs.388004	AHCY||S-adenosylhomocysteine hydrolase	Hs.36927	HSPH1||Heat shock 105kDa/110kDa protein 1	Hs.643813	ITGB1||Integrin, beta 1 (fibronectin receptor, beta polypeptide, antigen CD29 includes MDF2, MSK12)	Hs.283734	MRPL47||Mitochondrial ribosomal protein L47
Hs.14511|SCO1	Hs.136280|KLF16	Hs.132121|SGIP1	Hs.288224|MRPL50			Hs.388927	YY1||YY1 transcription factor	Hs.370504	RPS15A||Ribosomal protein S15a	Hs.654427	DHODH||Dihydroorotate dehydrogenase	Hs.288224	MRPL50||Mitochondrial ribosomal protein L50
Hs.145575|UBL3	Hs.137415|VIT	Hs.13225|B4GALT4	Hs.289271|CYC1			Hs.404321	GARS||Glycyl-tRNA synthetase	Hs.371282	TCF3||Transcription factor 3 (E2A immunoglobulin enhancer binding factors E12/E47)	Hs.655105	C14orf156||Chromosome 14 open reading frame 156	Hs.289271	CYC1||Cytochrome c-1
Hs.146186|SIM2	Hs.137562|C18orf45	Hs.132854|HIST1H3I	Hs.292156|DKK3			Hs.405610	MBD1||Methyl-CpG binding domain protein 1	Hs.371914	BLMH||Bleomycin hydrolase	Hs.655111	C3orf26||Chromosome 3 open reading frame 26	Hs.292156	DKK3||Dickkopf homolog 3 (Xenopus laevis)
Hs.14623|IFI30	Hs.13885|MED10	Hs.132902|CAP2	Hs.29444|MST150			Hs.414795	SERPINE1||Serpin peptidase inhibitor, clade E (nexin, plasminogen activator inhibitor type 1), member 1	Hs.376064	NOP56||NOP56 ribonucleoprotein homolog (yeast)	Hs.696283	NOP16||NOP16 nucleolar protein homolog (yeast)	Hs.29444	MST150||MSTP150
Hs.146393|HERPUD1	Hs.140452|M6PRBP1	Hs.133397|ITGA6	Hs.295563|C12orf45			Hs.416755	LARP6||La ribonucleoprotein domain family, member 6	Hs.377010	CAD||Carbamoyl-phosphate synthetase 2, aspartate transcarbamylase, and dihydroorotase	Hs.69851	GAR1||GAR1 ribonucleoprotein homolog (yeast)	Hs.295563	C12orf45||Chromosome 12 open reading frame 45
Hs.146591|BLK	Hs.141125|CASP3	Hs.133892|TPM1	Hs.296942|KRT34			Hs.421576	MAGOH||Mago-nashi homolog, proliferation-associated (Drosophila)	Hs.378103	RPS5||Ribosomal protein S5	Hs.699301	VDAC3||Voltage-dependent anion channel 3	Hs.296942	KRT34||Keratin 34
Hs.146806|CUL1	Hs.142074|RNF149	Hs.134296|DLC1	Hs.299002|FBL			Hs.430075	COX7C||Cytochrome c oxidase subunit VIIc	Hs.381189	CBX3||Chromobox homolog 3 (HP1 gamma homolog, Drosophila)	Hs.709216	SCARB1||Scavenger receptor class B, member 1	Hs.299002	FBL||Fibrillarin
Hs.147433|PCNA	Hs.142912|FZD2	Hs.134662|SLC6A4	Hs.300141|RPL39			Hs.430733	CLNS1A||Chloride channel, nucleotide-sensitive, 1A	Hs.381219	RPL15||Ribosomal protein L15	Hs.715543	BCCIP||BRCA2 and CDKN1A interacting protein	Hs.300141	RPL39||Ribosomal protein L39
Hs.14791|ACAD8	Hs.143250|TNC	Hs.134729|FXYD7	Hs.301048|SEH1L			Hs.431307	MRPL40||Mitochondrial ribosomal protein L40	Hs.388004	AHCY||S-adenosylhomocysteine hydrolase	Hs.716416	EI24||Etoposide induced 2.4 mRNA	Hs.301048	SEH1L||SEH1-like (S. cerevisiae)
Hs.148342|POLR3D	Hs.143751|MMP11	Hs.135406|CEBPZ	Hs.302408|RNF138			Hs.432330	RRAGA||Ras-related GTP binding A	Hs.389649	EIF4A3||Eukaryotic translation initiation factor 4A, isoform 3	Hs.719078	SERBP1||SERPINE1 mRNA binding protein 1	Hs.302408	RNF138||Ring finger protein 138
Hs.14839|POLR2G	Hs.143873|S100A10	Hs.135554|HSPA4L	Hs.303090|PPP1R3C			Hs.432574	POLR2H||Polymerase (RNA) II (DNA directed) polypeptide H	Hs.397609	RPS16||Ribosomal protein S16	Hs.719200	IFRD2||Interferon-related developmental regulator 2	Hs.303090	PPP1R3C||Protein phosphatase 1, regulatory (inhibitor) subunit 3C
Hs.14846|SLC7A1	Hs.144304|COQ2	Hs.136778|USP10	Hs.303649|CCL2			Hs.432674	LARS||Leucyl-tRNA synthetase	Hs.406300	RPL23||Ribosomal protein L23	Hs.73291	WDR12||WD repeat domain 12	Hs.303649	CCL2||Chemokine (C-C motif) ligand 2
Hs.148767|RQCD1	Hs.146393|HERPUD1	Hs.136979|RASAL3	Hs.306051|WNT5B			Hs.433512	ACTR3||ARP3 actin-related protein 3 homolog (yeast)	Hs.408767	CRYAB||Crystallin, alpha B	Hs.74615	PDGFRA||Platelet-derived growth factor receptor, alpha polypeptide	Hs.306051	WNT5B||Wingless-type MMTV integration site family, member 5B
Hs.149103|ARSB	Hs.148586|OTOS	Hs.137516|FIGNL1	Hs.306123|MAGEF1			Hs.435126	SLC2A4RG||SLC2A4 regulator	Hs.409065	FEN1||Flap structure-specific endonuclease 1	Hs.75231	SLC16A1||Solute carrier family 16, member 1 (monocarboxylic acid transporter 1)	Hs.306123	MAGEF1||Melanoma antigen family F, 1
Hs.149185|CNDP2	Hs.148907|SLC5A12	Hs.13852|DNAJB4	Hs.308613|MTERFD1			Hs.435166	LBR||Lamin B receptor	Hs.409412	PARP2||Poly (ADP-ribose) polymerase 2	Hs.78944	RGS2||Regulator of G-protein signaling 2, 24kDa	Hs.308613	MTERFD1||MTERF domain containing 1
Hs.149443|CYB561D2	Hs.149032|PIK3R4	Hs.1395|EGR2	Hs.309090|SFRS7			Hs.435735	SLC5A6||Solute carrier family 5 (sodium-dependent vitamin transporter), member 6	Hs.409965	PNN||Pinin, desmosome associated protein	Hs.79110	NCL||Nucleolin	Hs.309090	SFRS7||Splicing factor, arginine/serine-rich 7, 35kDa
Hs.149983|PEX14	Hs.149894|MTIF2	Hs.140443|NUDCD2	Hs.310421|APBB1IP			Hs.440599	DDX1||DEAD (Asp-Glu-Ala-Asp) box polypeptide 1	Hs.414795	SERPINE1||Serpin peptidase inhibitor, clade E (nexin, plasminogen activator inhibitor type 1), member 1	Hs.79334	NFIL3||Nuclear factor, interleukin 3 regulated	Hs.310421	APBB1IP||Amyloid beta (A4) precursor protein-binding, family B, member 1 interacting protein
Hs.150087|ERLIN1	Hs.150136|MAPK7	Hs.140720|FRAT2	Hs.325321|WDR18			Hs.441047	ADM||Adrenomedullin	Hs.42957	METTL1||Methyltransferase like 1	Hs.82432	GPD1L||Glycerol-3-phosphate dehydrogenase 1-like	Hs.325321	WDR18||WD repeat domain 18
Hs.150107|BIRC6	Hs.150458|RPUSD4	Hs.143080|HIST1H4B	Hs.326035|EGR1			Hs.443625	COL3A1||Collagen, type III, alpha 1	Hs.430075	COX7C||Cytochrome c oxidase subunit VIIc			Hs.326035	EGR1||Early growth response 1
Hs.150136|MAPK7	Hs.150651|FAM111A	Hs.143250|TNC	Hs.330663|C12orf48			Hs.443723	GRPEL1||GrpE-like 1, mitochondrial (E. coli)	Hs.430435	NUP54||Nucleoporin 54kDa			Hs.330663	C12orf48||Chromosome 12 open reading frame 48
Hs.151777|EIF2S1	Hs.151220|PALLD	Hs.1437|GAA	Hs.331431|PDS5A			Hs.443861	SRPK1||SFRS protein kinase 1	Hs.430733	CLNS1A||Chloride channel, nucleotide-sensitive, 1A			Hs.331431	PDS5A||PDS5, regulator of cohesion maintenance, homolog A (S. cerevisiae)
Hs.151787|EFTUD2	Hs.151777|EIF2S1	Hs.143751|MMP11	Hs.332706|OPTN			Hs.443914	SOD1||Superoxide dismutase 1, soluble	Hs.432574	POLR2H||Polymerase (RNA) II (DNA directed) polypeptide H			Hs.332706	OPTN||Optineurin
Hs.152475|ASCL2	Hs.152337|PRMT3	Hs.143818|GEMIN6	Hs.334612|SNRPE			Hs.44402	CSTF3||Cleavage stimulation factor, 3' pre-RNA, subunit 3, 77kDa	Hs.432674	LARS||Leucyl-tRNA synthetase			Hs.334612	SNRPE||Small nuclear ribonucleoprotein polypeptide E
Hs.152978|PSME3	Hs.153088|TAF1A	Hs.144114|CAMK2D	Hs.337295|STIP1			Hs.444118	MCM6||Minichromosome maintenance complex component 6	Hs.433222	NPC2||Niemann-Pick disease, type C2			Hs.337295	STIP1||Stress-induced-phosphoprotein 1
Hs.153357|PLOD3	Hs.154210|S1PR1	Hs.144304|COQ2	Hs.346868|EBNA1BP2			Hs.444213	TLE4||Transducin-like enhancer of split 4 (E(sp1) homolog, Drosophila)	Hs.433427	RPS17||Ribosomal protein S17			Hs.343828	ZNF598||Zinc finger protein 598
Hs.153678|UBXN8	Hs.154396|FAM57A	Hs.14468|PPAN	Hs.347144|C6orf192			Hs.444619	LAGE3||L antigen family, member 3	Hs.433529	RPS11||Ribosomal protein S11			Hs.346868	EBNA1BP2||EBNA1 binding protein 2
Hs.153768|RRP9	Hs.154495|ACHE	Hs.144936|IGF2BP1	Hs.356554|TRIT1			Hs.444986	METAP2||Methionyl aminopeptidase 2	Hs.435166	LBR||Lamin B receptor			Hs.347144	C6orf192||Chromosome 6 open reading frame 192
Hs.154296|TLL2	Hs.154510|CBR3	Hs.145150|SP110	Hs.356873|RBM8A			Hs.445403	IARS||Isoleucyl-tRNA synthetase	Hs.435735	SLC5A6||Solute carrier family 5 (sodium-dependent vitamin transporter), member 6			Hs.356554	TRIT1||TRNA isopentenyltransferase 1
Hs.154495|ACHE	Hs.154655|MRPS31	Hs.14559|CEP55	Hs.363137|TCP1			Hs.445570	CD63||CD63 molecule	Hs.43627	SOX12||SRY (sex determining region Y)-box 12			Hs.356873	RBM8A||RNA binding motif protein 8A
Hs.155204|ZNF174	Hs.155040|ZNF217	Hs.146161|ECE2	Hs.365116|U2AF1			Hs.446149	LDHB||Lactate dehydrogenase B	Hs.436564	PREP||Prolyl endopeptidase			Hs.363137	TCP1||T-complex 1
Hs.155218|HNRNPUL1	Hs.155912|CDH24	Hs.146668|SERINC1	Hs.367900|PDCD2			Hs.446352	ERBB2||V-erb-b2 erythroblastic leukemia viral oncogene homolog 2, neuro/glioblastoma derived oncogene homolog (avian)	Hs.438720	MCM7||Minichromosome maintenance complex component 7			Hs.365116	U2AF1||U2 small nuclear RNA auxiliary factor 1
Hs.15535|RPL11	Hs.156346|TOP2A	Hs.146688|PTGES	Hs.368912|DPP4			Hs.446427	OAZ1||Ornithine decarboxylase antizyme 1	Hs.440525	TIMM9||Translocase of inner mitochondrial membrane 9 homolog (yeast)			Hs.367900	PDCD2||Programmed cell death 2
Hs.15580|TSEN34	Hs.156540|SCG5	Hs.147433|PCNA	Hs.369056|SP100			Hs.446445	YIF1A||Yip1 interacting factor homolog A (S. cerevisiae)	Hs.440599	DDX1||DEAD (Asp-Glu-Ala-Asp) box polypeptide 1			Hs.368912	DPP4||Dipeptidyl-peptidase 4
Hs.155827|GOLGA2	Hs.157351|OLA1	Hs.147492|PEG10	Hs.370166|WSCD1			Hs.458360	UCK2||Uridine-cytidine kinase 2	Hs.441047	ADM||Adrenomedullin			Hs.369056	SP100||SP100 nuclear antigen
Hs.156367|RPS29	Hs.157394|HAGH	Hs.148178|RAP1GAP	Hs.371016|TBC1D2			Hs.459927	PTMA||Prothymosin, alpha	Hs.443861	SRPK1||SFRS protein kinase 1			Hs.370166	WSCD1||WSC domain containing 1
Hs.158932|APC	Hs.157527|TMEM121	Hs.149305|C1orf135	Hs.371914|BLMH			Hs.463456	NME1||Non-metastatic cells 1, protein (NM23A) expressed in	Hs.44402	CSTF3||Cleavage stimulation factor, 3' pre-RNA, subunit 3, 77kDa			Hs.371016	TBC1D2||TBC1 domain family, member 2
Hs.159028|BTN2A1	Hs.158529|CLSTN2	Hs.149585|LGSN	Hs.373498|SLC22A17			Hs.463797	MRTO4||MRNA turnover 4 homolog (S. cerevisiae)	Hs.444118	MCM6||Minichromosome maintenance complex component 6			Hs.371914	BLMH||Bleomycin hydrolase
Hs.159118|AMD1	Hs.159142|LFNG	Hs.149623|PLA2G3	Hs.373857|KLF12			Hs.464829	CDH2||Cadherin 2, type 1, N-cadherin (neuronal)	Hs.444931	MED17||Mediator complex subunit 17			Hs.373498	SLC22A17||Solute carrier family 22, member 17
Hs.159226|HAS2	Hs.159448|SURF2	Hs.150458|RPUSD4	Hs.375129|MMP3			Hs.464971	PIK3C3||Phosphoinositide-3-kinase, class 3	Hs.444986	METAP2||Methionyl aminopeptidase 2			Hs.373857	KLF12||Kruppel-like factor 12
Hs.159410|MOCS3	Hs.159494|BTK	Hs.151220|PALLD	Hs.376064|NOP56			Hs.465087	SMAD7||SMAD family member 7	Hs.445757	CR2||Complement component (3d/Epstein Barr virus) receptor 2			Hs.374950	MT1X||Metallothionein 1X
Hs.1600|CCT5	Hs.1600|CCT5	Hs.151777|EIF2S1	Hs.380906|MYADM			Hs.465413	CYB5A||Cytochrome b5 type A (microsomal)	Hs.446149	LDHB||Lactate dehydrogenase B			Hs.375129	MMP3||Matrix metallopeptidase 3 (stromelysin 1, progelatinase)
Hs.16003|RBBP4	Hs.160375|FOXB1	Hs.151787|EFTUD2	Hs.381189|CBX3			Hs.465498	TXNL4A||Thioredoxin-like 4A	Hs.446588	RPS13||Ribosomal protein S13			Hs.376064	NOP56||NOP56 ribonucleoprotein homolog (yeast)
Hs.160211|THRAP3	Hs.162121|COPA	Hs.15243|IFFO1	Hs.384598|SERPING1			Hs.465870	KEAP1||Kelch-like ECH-associated protein 1	Hs.458360	UCK2||Uridine-cytidine kinase 2			Hs.380906	MYADM||Myeloid-associated differentiation marker
Hs.160786|ASS1	Hs.162717|HPDL	Hs.152774|TRAK2	Hs.3873|PPT1			Hs.467020	BBC3||BCL2 binding component 3	Hs.459927	PTMA||Prothymosin, alpha			Hs.381189	CBX3||Chromobox homolog 3 (HP1 gamma homolog, Drosophila)
Hs.161000|ARID4A	Hs.163451|PYCR1	Hs.153026|SWAP70	Hs.387804|PABPC1			Hs.467701	ODC1||Ornithine decarboxylase 1	Hs.463506	AKAP1||A kinase (PRKA) anchor protein 1			Hs.384598	SERPING1||Serpin peptidase inhibitor, clade G (C1 inhibitor), member 1
Hs.161839|MMP8	Hs.164060|GRB10	Hs.153850|CHTF18	Hs.388004|AHCY			Hs.469030	MTHFD2||Methylenetetrahydrofolate dehydrogenase (NADP+ dependent) 2, methenyltetrahydrofolate cyclohydrolase	Hs.466775	SNRPA||Small nuclear ribonucleoprotein polypeptide A			Hs.3873	PPT1||Palmitoyl-protein thioesterase 1
Hs.162032|HBP1	Hs.164070|THEM4	Hs.153952|NT5E	Hs.388170|TSR1			Hs.469264	RPIA||Ribose 5-phosphate isomerase A	Hs.467701	ODC1||Ornithine decarboxylase 1			Hs.387804	PABPC1||Poly(A) binding protein, cytoplasmic 1
Hs.162585|SLC12A2	Hs.164118|SLC5A11	Hs.154210|S1PR1	Hs.396644|			Hs.469723	RCC1||Regulator of chromosome condensation 1	Hs.469030	MTHFD2||Methylenetetrahydrofolate dehydrogenase (NADP+ dependent) 2, methenyltetrahydrofolate cyclohydrolase			Hs.388004	AHCY||S-adenosylhomocysteine hydrolase
Hs.163451|PYCR1	Hs.164226|THBS1	Hs.154276|BACH1	Hs.398157|PLK2			Hs.470907	AK2||Adenylate kinase 2	Hs.469264	RPIA||Ribose 5-phosphate isomerase A			Hs.388170	TSR1||TSR1, 20S rRNA accumulation, homolog (S. cerevisiae)
Hs.163645|MOCS2	Hs.166924|SEC13	Hs.154495|ACHE	Hs.40098|GREM1			Hs.471221	KLF7||Kruppel-like factor 7 (ubiquitous)	Hs.469723	RCC1||Regulator of chromosome condensation 1			Hs.396644	||Poly(A) binding protein interacting protein 2, mRNA (cDNA clone MGC:43513 IMAGE:5268469)
Hs.163867|CD14	Hs.167046|ADORA2B	Hs.15535|RPL11	Hs.401842|RSL1D1			Hs.473648	GART||Phosphoribosylglycinamide formyltransferase, phosphoribosylglycinamide synthetase, phosphoribosylaminoimidazole synthetase	Hs.470654	CDCA7||Cell division cycle associated 7			Hs.397465	HIPK2||Homeodomain interacting protein kinase 2
Hs.164144|EIF5A2	Hs.167115|ENDOD1	Hs.156346|TOP2A	Hs.40499|DKK1			Hs.473838	PSMG1||Proteasome (prosome, macropain) assembly chaperone 1	Hs.473087	CTPS||CTP synthase			Hs.398157	PLK2||Polo-like kinase 2 (Drosophila)
Hs.164226|THBS1	Hs.167679|SH3BP2	Hs.156367|RPS29	Hs.405144|SFRS3			Hs.476415	APPL1||Adaptor protein, phosphotyrosine interaction, PH domain and leucine zipper containing 1	Hs.473648	GART||Phosphoribosylglycinamide formyltransferase, phosphoribosylglycinamide synthetase, phosphoribosylaminoimidazole synthetase			Hs.40098	GREM1||Gremlin 1, cysteine knot superfamily, homolog (Xenopus laevis)
Hs.165950|FGFR4	Hs.168073|TRPC4AP	Hs.156667|CALCOCO1	Hs.408061|FABP5			Hs.477879	H2AFX||H2A histone family, member X	Hs.473838	PSMG1||Proteasome (prosome, macropain) assembly chaperone 1			Hs.401842	RSL1D1||Ribosomal L1 domain containing 1
Hs.166015|FGF6	Hs.169378|MPDZ	Hs.157351|OLA1	Hs.408434|COPZ2			Hs.478067	LXN||Latexin	Hs.4747	DKC1||Dyskeratosis congenita 1, dyskerin			Hs.40499	DKK1||Dickkopf homolog 1 (Xenopus laevis)
Hs.166017|MITF	Hs.169840|TTK	Hs.157401|TPRKB	Hs.409602|SULF1			Hs.480073	HNRNPD||Heterogeneous nuclear ribonucleoprotein D (AU-rich element RNA binding protein 1, 37kDa)	Hs.474980	PHF5A||PHD finger protein 5A			Hs.405144	SFRS3||Splicing factor, arginine/serine-rich 3
Hs.166120|IRF7	Hs.171695|DUSP1	Hs.157461|PRR16	Hs.410977|TAGLN			Hs.480876	ANAPC10||Anaphase promoting complex subunit 10	Hs.477879	H2AFX||H2A histone family, member X			Hs.408061	FABP5||Fatty acid binding protein 5 (psoriasis-associated)
Hs.166539|ITGB3BP	Hs.171995|KLK3	Hs.159142|LFNG	Hs.412462|R3HDM1			Hs.483873	GM2A||GM2 ganglioside activator	Hs.480073	HNRNPD||Heterogeneous nuclear ribonucleoprotein D (AU-rich element RNA binding protein 1, 37kDa)			Hs.408434	COPZ2||Coatomer protein complex, subunit zeta 2
Hs.167368|CTNNA2	Hs.172587|RAD51L1	Hs.1594|CENPA	Hs.413297|RGS16			Hs.487062	IGF2R||Insulin-like growth factor 2 receptor	Hs.490203	CALD1||Caldesmon 1			Hs.409602	SULF1||Sulfatase 1
Hs.167535|SRP54	Hs.172928|COL1A1	Hs.159430|FNDC3B	Hs.414795|SERPINE1			Hs.489142	COL1A2||Collagen, type I, alpha 2	Hs.491232	SLC39A14||Solute carrier family 39 (zinc transporter), member 14			Hs.410977	TAGLN||Transgelin
Hs.167584|SLC2A2	Hs.173162|COX4NB	Hs.159492|SACS	Hs.419463|RPL23A			Hs.490203	CALD1||Caldesmon 1	Hs.491494	CCT3||Chaperonin containing TCP1, subunit 3 (gamma)			Hs.412462	R3HDM1||R3H domain containing 1
Hs.167805|EPC1	Hs.175905|AUH	Hs.159546|ABCD1	Hs.421194|TPST1			Hs.491232	SLC39A14||Solute carrier family 39 (zinc transporter), member 14	Hs.494261	PSAT1||Phosphoserine aminotransferase 1			Hs.413297	RGS16||Regulator of G-protein signaling 16
Hs.168950|GDAP1	Hs.177530|ATP5E	Hs.15977|NDUFB9	Hs.421621|COX7A1			Hs.491682	PRKDC||Protein kinase, DNA-activated, catalytic polypeptide	Hs.495985	TCIRG1||T-cell, immune regulator 1, ATPase, H+ transporting, lysosomal V0 subunit A3			Hs.414795	SERPINE1||Serpin peptidase inhibitor, clade E (nexin, plasminogen activator inhibitor type 1), member 1
Hs.169611|DIABLO	Hs.177766|PARP1	Hs.1600|CCT5	Hs.424908|LSM5			Hs.493309	KIAA0020||KIAA0020	Hs.496684	LAMP2||Lysosomal-associated membrane protein 2			Hs.419463	RPL23A||Ribosomal protein L23a
Hs.170479|PLA2G6	Hs.177841|BHLHE41	Hs.162717|HPDL	Hs.425125|RPL29			Hs.494261	PSAT1||Phosphoserine aminotransferase 1	Hs.497788	EPRS||Glutamyl-prolyl-tRNA synthetase			Hs.421194	TPST1||Tyrosylprotein sulfotransferase 1
Hs.1706|IRF9	Hs.178305|PIGK	Hs.163543|AIFM3	Hs.4253|CCDC86			Hs.494691	PFN1||Profilin 1	Hs.499839	RPL7A||Ribosomal protein L7a			Hs.421621	COX7A1||Cytochrome c oxidase subunit VIIa polypeptide 1 (muscle)
Hs.171501|USP11	Hs.178728|MBD3	Hs.163990|FRMPD1	Hs.42949|HES6			Hs.495704	RAB9A||RAB9A, member RAS oncogene family	Hs.502182	BDNF||Brain-derived neurotrophic factor			Hs.424908	LSM5||LSM5 homolog, U6 small nuclear RNA associated (S. cerevisiae)
Hs.171596|EPHA2	Hs.179312|SNAPC1	Hs.165803|FAM83E	Hs.430075|COX7C			Hs.496622	PLS3||Plastin 3 (T isoform)	Hs.503315	PRKRIR||Protein-kinase, interferon-inducible double stranded RNA dependent inhibitor, repressor of (P58 repressor)			Hs.425125	RPL29||Ribosomal protein L29
Hs.171695|DUSP1	Hs.17936|C15orf39	Hs.167046|ADORA2B	Hs.430733|CLNS1A			Hs.499839	RPL7A||Ribosomal protein L7a	Hs.504620	PHB2||Prohibitin 2			Hs.4253	CCDC86||Coiled-coil domain containing 86
Hs.17170|GPR4	Hs.179522|SLC2A8	Hs.16757|GKN2	Hs.432132|G0S2			Hs.500842	MGEA5||Meningioma expressed antigen 5 (hyaluronidase)	Hs.506748	HDGF||Hepatoma-derived growth factor (high-mobility group protein 1-like)			Hs.42949	HES6||Hairy and enhancer of split 6 (Drosophila)
Hs.172755|BRP44L	Hs.179986|FLOT1	Hs.169840|TTK	Hs.432574|POLR2H			Hs.502182	BDNF||Brain-derived neurotrophic factor	Hs.507584	POLR1D||Polymerase (RNA) I polypeptide D, 16kDa			Hs.429666	CEBPG||CCAAT/enhancer binding protein (C/EBP), gamma
Hs.172791|UXT	Hs.180062|PSMB8	Hs.170568|TATDN1	Hs.432674|LARS			Hs.502745	FADS2||Fatty acid desaturase 2	Hs.507669	FRY||Furry homolog (Drosophila)			Hs.430075	COX7C||Cytochrome c oxidase subunit VIIc
Hs.173162|COX4NB	Hs.180312|MRPS16	Hs.1706|IRF9	Hs.433278|EBPL			Hs.503315	PRKRIR||Protein-kinase, interferon-inducible double stranded RNA dependent inhibitor, repressor of (P58 repressor)	Hs.509736	HSP90AB1||Heat shock protein 90kDa alpha (cytosolic), class B member 1			Hs.430733	CLNS1A||Chloride channel, nucleotide-sensitive, 1A
Hs.174103|ITGAL	Hs.180591|NUP35	Hs.171695|DUSP1	Hs.434044|PRKCDBP			Hs.503878	NCAM1||Neural cell adhesion molecule 1	Hs.511915	ENO2||Enolase 2 (gamma, neuronal)			Hs.432132	G0S2||G0/G1switch 2
Hs.17441|COL4A1	Hs.180711|STX3	Hs.172772|TCEB2	Hs.434953|HMGB2			Hs.507584	POLR1D||Polymerase (RNA) I polypeptide D, 16kDa	Hs.512599	CDKN2A||Cyclin-dependent kinase inhibitor 2A (melanoma, p16, inhibits CDK4)			Hs.432574	POLR2H||Polymerase (RNA) II (DNA directed) polypeptide H
Hs.17518|RSAD2	Hs.180919|ID2	Hs.172865|CSTF1	Hs.435013|VGLL3			Hs.507769	ALG5||Asparagine-linked glycosylation 5, dolichyl-phosphate beta-glucosyltransferase homolog (S. cerevisiae)	Hs.512676	RPS25||Ribosomal protein S25			Hs.432674	LARS||Leucyl-tRNA synthetase
Hs.175905|AUH	Hs.182215|ARL3	Hs.173043|MTA2	Hs.435166|LBR			Hs.509067	PDGFRB||Platelet-derived growth factor receptor, beta polypeptide	Hs.513803	CYBA||Cytochrome b-245, alpha polypeptide			Hs.433278	EBPL||Emopamil binding protein-like
Hs.17614|ABCB10	Hs.182255|NHP2L1	Hs.173233|TMEM100	Hs.435215|VEGFC			Hs.512675	RPS8||Ribosomal protein S8	Hs.513851	YWHAE||Tyrosine 3-monooxygenase/tryptophan 5-monooxygenase activation protein, epsilon polypeptide			Hs.434044	PRKCDBP||Protein kinase C, delta binding protein
Hs.17631|FZD5	Hs.182729|RNMTL1	Hs.173464|FKBP8	Hs.435735|SLC5A6			Hs.512908	ARPP-19||Cyclic AMP phosphoprotein, 19 kD	Hs.514870	ATP5F1||ATP synthase, H+ transporting, mitochondrial F0 complex, subunit B1			Hs.434953	HMGB2||High-mobility group box 2
Hs.177530|ATP5E	Hs.182885|SLC35B2	Hs.175322|USP13	Hs.435850|LYPLA1			Hs.513803	CYBA||Cytochrome b-245, alpha polypeptide	Hs.515070	EEF2||Eukaryotic translation elongation factor 2			Hs.435013	VGLL3||Vestigial like 3 (Drosophila)
Hs.177766|PARP1	Hs.183114|ARHGAP28	Hs.17631|FZD5	Hs.435933|PHF10			Hs.514581	ACTG1||Actin, gamma 1	Hs.515469	VASP||Vasodilator-stimulated phosphoprotein			Hs.435166	LBR||Lamin B receptor
Hs.178551|RPL8	Hs.184233|HSPA9	Hs.177766|PARP1	Hs.437060|CYCS			Hs.514870	ATP5F1||ATP synthase, H+ transporting, mitochondrial F0 complex, subunit B1	Hs.515517	RPL18||Ribosomal protein L18			Hs.435215	VEGFC||Vascular endothelial growth factor C
Hs.179312|SNAPC1	Hs.18442|ENOPH1	Hs.177861|SF3B14	Hs.437403|PPA1			Hs.517601	RAC2||Ras-related C3 botulinum toxin substrate 2 (rho family, small GTP binding protein Rac2)	Hs.516933	NXT1||NTF2-like export factor 1			Hs.435735	SLC5A6||Solute carrier family 5 (sodium-dependent vitamin transporter), member 6
Hs.179565|MCM3	Hs.18676|SPRY2	Hs.178357|C9orf82	Hs.438231|TFPI2			Hs.517792	VHL||Von Hippel-Lindau tumor suppressor	Hs.517342	NIT1||Nitrilase 1			Hs.435850	LYPLA1||Lysophospholipase I
Hs.179718|MYBL2	Hs.187459|ZDHHC14	Hs.179565|MCM3	Hs.438953|SGCB			Hs.517949	MAP4||Microtubule-associated protein 4	Hs.517581	HMOX1||Heme oxygenase (decycling) 1			Hs.435933	PHF10||PHD finger protein 10
Hs.180877|H3F3B	Hs.18889|SEC31B	Hs.179718|MYBL2	Hs.440599|DDX1			Hs.518249	CNBP||CCHC-type zinc finger, nucleic acid binding protein	Hs.518662	FAM129A||Family with sequence similarity 129, member A			Hs.437060	CYCS||Cytochrome c, somatic
Hs.180919|ID2	Hs.189075|TWF1	Hs.180142|CALML5	Hs.441047|ADM			Hs.519320	VDAC1||Voltage-dependent anion channel 1	Hs.519972	HLA-F||Major histocompatibility complex, class I, F			Hs.437403	PPA1||Pyrophosphatase (inorganic) 1
Hs.180933|CXXC1	Hs.189445|MATN2	Hs.180591|NUP35	Hs.443861|SRPK1			Hs.519445	NR2F1||Nuclear receptor subfamily 2, group F, member 1	Hs.520506	FBXO5||F-box protein 5			Hs.438231	TFPI2||Tissue factor pathway inhibitor 2
Hs.181128|ELK1	Hs.18946|MRPS26	Hs.181244|HLA-A	Hs.44402|CSTF3			Hs.520313	CD164||CD164 molecule, sialomucin	Hs.520943	EIF4H||Eukaryotic translation initiation factor 4H			Hs.438953	SGCB||Sarcoglycan, beta (43kDa dystrophin-associated glycoprotein)
Hs.18160|MYCT1	Hs.189641|SEC24D	Hs.181300|SEL1L	Hs.444099|AADACL1			Hs.520898	CTSB||Cathepsin B	Hs.522891	CXCL12||Chemokine (C-X-C motif) ligand 12 (stromal cell-derived factor 1)			Hs.440599	DDX1||DEAD (Asp-Glu-Ala-Asp) box polypeptide 1
Hs.182137|HIST1H2BF	Hs.190544|PXK	Hs.18192|SRRM1	Hs.444118|MCM6			Hs.520943	EIF4H||Eukaryotic translation initiation factor 4H	Hs.523004	PSAP||Prosaposin			Hs.441047	ADM||Adrenomedullin
Hs.182825|RPL35	Hs.192221|ELL2	Hs.182825|RPL35	Hs.444986|METAP2			Hs.522891	CXCL12||Chemokine (C-X-C motif) ligand 12 (stromal cell-derived factor 1)	Hs.523185	RPL13A||Ribosomal protein L13a			Hs.443861	SRPK1||SFRS protein kinase 1
Hs.184211|PMPCB	Hs.193133|SASH1	Hs.18349|MRPL15	Hs.445758|E2F5			Hs.523238	NOLC1||Nucleolar and coiled-body phosphoprotein 1	Hs.523238	NOLC1||Nucleolar and coiled-body phosphoprotein 1			Hs.44402	CSTF3||Cleavage stimulation factor, 3' pre-RNA, subunit 3, 77kDa
Hs.184233|HSPA9	Hs.193842|TDRD7	Hs.184085|CRYAA	Hs.446149|LDHB			Hs.523687	CLP1||CLP1, cleavage and polyadenylation factor I subunit, homolog (S. cerevisiae)	Hs.523852	CCND1||Cyclin D1			Hs.444099	AADACL1||Arylacetamide deacetylase-like 1
Hs.18426|HRSP12	Hs.194695|DIRAS3	Hs.184233|HSPA9	Hs.450230|IGFBP3			Hs.523836	GSTP1||Glutathione S-transferase pi 1	Hs.524183	FKBP4||FK506 binding protein 4, 59kDa			Hs.444118	MCM6||Minichromosome maintenance complex component 6
Hs.18442|ENOPH1	Hs.19492|PCDH8	Hs.18426|HRSP12	Hs.458360|UCK2			Hs.529618	TFRC||Transferrin receptor (p90, CD71)	Hs.524308	TIMM23||Translocase of inner mitochondrial membrane 23 homolog (yeast)			Hs.444986	METAP2||Methionyl aminopeptidase 2
Hs.184727|MFI2	Hs.195040|HSD11B1	Hs.184492|ELAVL1	Hs.458485|ISG15			Hs.534169	HSPA14||Heat shock 70kDa protein 14	Hs.524464	ATP5G2||ATP synthase, H+ transporting, mitochondrial F0 complex, subunit C2 (subunit 9)			Hs.445758	E2F5||E2F transcription factor 5, p130-binding
Hs.186486|MAP3K5	Hs.195464|FLNA	Hs.184720|ALMS1	Hs.458485|ISG15			Hs.534334	NOP2||NOP2 nucleolar protein homolog (yeast)	Hs.525600	HSP90AA1||Heat shock protein 90kDa alpha (cytosolic), class A member 1			Hs.446149	LDHB||Lactate dehydrogenase B
Hs.187946|SLC20A1	Hs.195727|CD248	Hs.18788|HSD17B14	Hs.458598|UTP14A			Hs.534770	PKM2||Pyruvate kinase, muscle	Hs.527193	RPS23||Ribosomal protein S23			Hs.450230	IGFBP3||Insulin-like growth factor binding protein 3
Hs.190028|GSTO1	Hs.195740|AATF	Hs.188464|MAN2B2	Hs.458747|ANP32A			Hs.535901	BOP1||Block of proliferation 1	Hs.532265	WDSOF1||WD repeats and SOF1 domain containing			Hs.458360	UCK2||Uridine-cytidine kinase 2
Hs.190622|DDX58	Hs.198072|PDE4B	Hs.189445|MATN2	Hs.459927|PTMA			Hs.539684	EIF2S3||Eukaryotic translation initiation factor 2, subunit 3 gamma, 52kDa	Hs.533013	CBS||Cystathionine-beta-synthase			Hs.458485	ISG15||ISG15 ubiquitin-like modifier
Hs.190968|RPS21	Hs.198760|NEFH	Hs.18946|MRPS26	Hs.459927|PTMA			Hs.546256	GCSH||Glycine cleavage system protein H (aminomethyl carrier)	Hs.533355	MPP6||Membrane protein, palmitoylated 6 (MAGUK p55 subfamily member 6)			Hs.458499	USP3||Ubiquitin specific peptidase 3
Hs.191164|CHD1L	Hs.199579|MRPL42	Hs.189772|CCT2	Hs.460996|TRADD			Hs.546261	HNRNPA1||Heterogeneous nuclear ribonucleoprotein A1	Hs.534169	HSPA14||Heat shock 70kDa protein 14			Hs.458598	UTP14A||UTP14, U3 small nucleolar ribonucleoprotein, homolog A (yeast)
Hs.191734|MGST3	Hs.200016|NUDT11	Hs.190518|C21orf45	Hs.462379|TOM1L2			Hs.546282	RBBP8||Retinoblastoma binding protein 8	Hs.534334	NOP2||NOP2 nucleolar protein homolog (yeast)			Hs.458747	ANP32A||Acidic (leucine-rich) nuclear phosphoprotein 32 family, member A
Hs.191887|SEC61B	Hs.200051|ACBD6	Hs.190520|LSM6	Hs.462998|IGFBP4			Hs.546286	RPS3||Ribosomal protein S3	Hs.535901	BOP1||Block of proliferation 1			Hs.459927	PTMA||Prothymosin, alpha
Hs.192374|HSP90B1	Hs.200100|C7orf41	Hs.190622|DDX58	Hs.463964|WIPI1			Hs.546323	SUCLA2||Succinate-CoA ligase, ADP-forming, beta subunit	Hs.546286	RPS3||Ribosomal protein S3			Hs.460996	TRADD||TNFRSF1A-associated via death domain
Hs.193043|CLCN6	Hs.200333|APOB48R	Hs.190968|RPS21	Hs.465929|CNN1			Hs.555866	C1QBP||Complement component 1, q subcomponent binding protein	Hs.555866	C1QBP||Complement component 1, q subcomponent binding protein			Hs.462379	TOM1L2||Target of myb1-like 2 (chicken)
Hs.193725|PSMD5	Hs.200600|SCAMP3	Hs.190977|ENPP2	Hs.465929|CNN1			Hs.557550	NPM1||Nucleophosmin (nucleolar phosphoprotein B23, numatrin)	Hs.557550	NPM1||Nucleophosmin (nucleolar phosphoprotein B23, numatrin)			Hs.462998	IGFBP4||Insulin-like growth factor binding protein 4
Hs.194121|RCL1	Hs.201034|NTN4	Hs.19114|HMGB3	Hs.466539|CLIP3			Hs.558459	NUDT6||Nudix (nucleoside diphosphate linked moiety X)-type motif 6	Hs.567567	NCAPG||Non-SMC condensin I complex, subunit G			Hs.463964	WIPI1||WD repeat domain, phosphoinositide interacting 1
Hs.194143|BRCA1	Hs.201641|BASP1	Hs.191334|UNG	Hs.467701|ODC1			Hs.567498	C4orf18||Chromosome 4 open reading frame 18	Hs.571841	RPL7||Ribosomal protein L7			Hs.465929	CNN1||Calponin 1, basic, smooth muscle
Hs.194333|E2F2	Hs.201978|PTGS1	Hs.192221|ELL2	Hs.467751|TRIB2			Hs.567567	NCAPG||Non-SMC condensin I complex, subunit G	Hs.57813	ZNRD1||Zinc ribbon domain containing 1			Hs.466539	CLIP3||CAP-GLY domain containing linker protein 3
Hs.196129|DMTF1	Hs.202453|	Hs.193832|GPATCH4	Hs.468410|EPAS1			Hs.583348	INHBA||Inhibin, beta A	Hs.584784	NUP88||Nucleoporin 88kDa			Hs.467701	ODC1||Ornithine decarboxylase 1
Hs.1976|PDGFB	Hs.203420|TNK1	Hs.194143|BRCA1	Hs.469030|MTHFD2			Hs.584881	FAM162A||Family with sequence similarity 162, member A	Hs.584909	SCAND1||SCAN domain containing 1			Hs.467751	TRIB2||Tribbles homolog 2 (Drosophila)
Hs.198003|SARDH	Hs.203691|DCBLD2	Hs.194301|MAP1A	Hs.469264|RPIA			Hs.591346	CTGF||Connective tissue growth factor	Hs.58974	CCNA2||Cyclin A2			Hs.468410	EPAS1||Endothelial PAS domain protein 1
Hs.198760|NEFH	Hs.203717|FN1	Hs.194698|CCNB2	Hs.469723|RCC1			Hs.591506	MYCBP||C-myc binding protein	Hs.591156	CREBL2||CAMP responsive element binding protein-like 2			Hs.469030	MTHFD2||Methylenetetrahydrofolate dehydrogenase (NADP+ dependent) 2, methenyltetrahydrofolate cyclohydrolase
Hs.199625|HAX1	Hs.203910|SGTA	Hs.194777|MEP1B	Hs.471104|NOP58			Hs.591642	BARD1||BRCA1 associated RING domain 1	Hs.591506	MYCBP||C-myc binding protein			Hs.469264	RPIA||Ribose 5-phosphate isomerase A
Hs.20021|VAMP1	Hs.204041|AHSA1	Hs.195659|SRC	Hs.472038|UTP11L			Hs.591761	HOMER1||Homer homolog 1 (Drosophila)	Hs.591697	MAD2L1||MAD2 mitotic arrest deficient-like 1 (yeast)			Hs.469723	RCC1||Regulator of chromosome condensation 1
Hs.200600|SCAMP3	Hs.204475|HTATSF1	Hs.195727|CD248	Hs.473648|GART			Hs.595072	TOMM22||Translocase of outer mitochondrial membrane 22 homolog (yeast)	Hs.591761	HOMER1||Homer homolog 1 (Drosophila)			Hs.471104	NOP58||NOP58 ribonucleoprotein homolog (yeast)
Hs.200804|SDCBP	Hs.2057|UMPS	Hs.196054|HDAC9	Hs.473838|PSMG1			Hs.596461	IDH2||Isocitrate dehydrogenase 2 (NADP+), mitochondrial	Hs.591768	BTF3||Basic transcription factor 3			Hs.472038	UTP11L||UTP11-like, U3 small nucleolar ribonucleoprotein, (yeast)
Hs.20107|KLC1	Hs.206770|ZBTB22	Hs.197755|C20orf195	Hs.474206|HIRA			Hs.596572	SR140||U2-associated SR140 protein	Hs.591931	DDX10||DEAD (Asp-Glu-Ala-Asp) box polypeptide 10			Hs.473648	GART||Phosphoribosylglycinamide formyltransferase, phosphoribosylglycinamide synthetase, phosphoribosylaminoimidazole synthetase
Hs.201897|POLA2	Hs.207631|LMO7	Hs.198158|PBLD	Hs.477128|CCDC80			Hs.603842	MAGI2||Membrane associated guanylate kinase, WW and PDZ domain containing 2	Hs.592212	TYMP||Thymidine phosphorylase			Hs.473838	PSMG1||Proteasome (prosome, macropain) assembly chaperone 1
Hs.201978|PTGS1	Hs.208124|ESR1	Hs.198252|CXCR3	Hs.477481|MCM2			Hs.605445	ERRFI1||ERBB receptor feedback inhibitor 1	Hs.592338	TYMS||Thymidylate synthetase			Hs.474206	HIRA||HIR histone cell cycle regulation defective homolog A (S. cerevisiae)
Hs.202|TSPO	Hs.210995|CA12	Hs.199579|MRPL42	Hs.477879|H2AFX			Hs.62192	F3||Coagulation factor III (thromboplastin, tissue factor)	Hs.595072	TOMM22||Translocase of outer mitochondrial membrane 22 homolog (yeast)			Hs.477128	CCDC80||Coiled-coil domain containing 80
Hs.203717|FN1	Hs.211238|IL1F9	Hs.199850|DCHS1	Hs.479808|IGFBP7			Hs.624291	BAX||BCL2-associated X protein	Hs.595669	NCBP1||Nuclear cap binding protein subunit 1, 80kDa			Hs.477481	MCM2||Minichromosome maintenance complex component 2
Hs.20521|PRMT1	Hs.211571|HCCS	Hs.19987|FLJ14213	Hs.480073|HNRNPD			Hs.631995	SLC39A7||Solute carrier family 39 (zinc transporter), member 7	Hs.597656	MSH2||MutS homolog 2, colon cancer, nonpolyposis type 1 (E. coli)			Hs.477879	H2AFX||H2A histone family, member X
Hs.2057|UMPS	Hs.212332|CAV2	Hs.200770|SKAP2	Hs.480378|DDIT4L			Hs.632041	EXOSC4||Exosome component 4	Hs.604001	HNRNPH1||Heterogeneous nuclear ribonucleoprotein H1 (H)			Hs.479808	IGFBP7||Insulin-like growth factor binding protein 7
Hs.208414|SLC25A40	Hs.2128|DUSP5	Hs.201034|NTN4	Hs.481526|NSUN2			Hs.632717	MYL6||Myosin, light chain 6, alkali, smooth muscle and non-muscle	Hs.605445	ERRFI1||ERBB receptor feedback inhibitor 1			Hs.480073	HNRNPD||Heterogeneous nuclear ribonucleoprotein D (AU-rich element RNA binding protein 1, 37kDa)
Hs.2090|PTGER2	Hs.21639|SPEG	Hs.201071|RGAG1	Hs.481980|DAB2			Hs.634680	GPN3||GPN-loop GTPase 3	Hs.6076	COPS3||COP9 constitutive photomorphogenic homolog subunit 3 (Arabidopsis)			Hs.480378	DDIT4L||DNA-damage-inducible transcript 4-like
Hs.209945|TDP1	Hs.22011|C1QTNF6	Hs.201446|PERP	Hs.482077|ITGA2			Hs.643683	ITM2B||Integral membrane protein 2B	Hs.62192	F3||Coagulation factor III (thromboplastin, tissue factor)			Hs.481526	NSUN2||NOL1/NOP2/Sun domain family, member 2
Hs.209983|STMN1	Hs.220963|MDP-1	Hs.201641|BASP1	Hs.482491|MRPS27			Hs.643813	ITGB1||Integrin, beta 1 (fibronectin receptor, beta polypeptide, antigen CD29 includes MDF2, MSK12)	Hs.624291	BAX||BCL2-associated X protein			Hs.481980	DAB2||Disabled homolog 2, mitogen-responsive phosphoprotein (Drosophila)
Hs.210283|COL5A1	Hs.224008|FEZ1	Hs.202097|PCOLCE	Hs.482976|C5orf30			Hs.646856	KIF15||Kinesin family member 15	Hs.632258	IFI35||Interferon-induced protein 35			Hs.482077	ITGA2||Integrin, alpha 2 (CD49B, alpha 2 subunit of VLA-2 receptor)
Hs.210385|HERC1	Hs.22452|TMEM63C	Hs.202453|	Hs.483944|ADAM19			Hs.647371	MT2A||Metallothionein 2A	Hs.632717	MYL6||Myosin, light chain 6, alkali, smooth muscle and non-muscle			Hs.482491	MRPS27||Mitochondrial ribosomal protein S27
Hs.211426|THBS4	Hs.224764|CRLS1	Hs.202522|C1orf85	Hs.484227|THOC3			Hs.654400	IMPDH2||IMP (inosine monophosphate) dehydrogenase 2	Hs.633514	TIMP2||TIMP metallopeptidase inhibitor 2			Hs.482976	C5orf30||Chromosome 5 open reading frame 30
Hs.211594|PSMC4	Hs.22587|SSX2IP	Hs.202672|DNMT1	Hs.487635|BZW2			Hs.654427	DHODH||Dihydroorotate dehydrogenase	Hs.634680	GPN3||GPN-loop GTPase 3			Hs.483944	ADAM19||ADAM metallopeptidase domain 19 (meltrin beta)
Hs.211600|TNFAIP3	Hs.225936|SYN1	Hs.203637|PLS1	Hs.490203|CALD1			Hs.655105	C14orf156||Chromosome 14 open reading frame 156	Hs.643436	ZNF146||Zinc finger protein 146			Hs.484227	THOC3||THO complex 3
Hs.211602|SMC1A	Hs.226007|RDH11	Hs.203691|DCBLD2	Hs.490394|SSBP1			Hs.655111	C3orf26||Chromosome 3 open reading frame 26	Hs.643813	ITGB1||Integrin, beta 1 (fibronectin receptor, beta polypeptide, antigen CD29 includes MDF2, MSK12)			Hs.487635	BZW2||Basic leucine zipper and W2 domains 2
Hs.212838|A2M	Hs.230601|DNAJC19	Hs.205163|MRPL3	Hs.491232|SLC39A14			Hs.655372	WDR74||WD repeat domain 74	Hs.652308	MTHFD1||Methylenetetrahydrofolate dehydrogenase (NADP+ dependent) 1, methenyltetrahydrofolate cyclohydrolase, formyltetrahydrofolate synthetase			Hs.490203	CALD1||Caldesmon 1
Hs.21334|NAGPA	Hs.23111|FARSA	Hs.205558|GLIPR1	Hs.491234|RIT1			Hs.655467	POLH||Polymerase (DNA directed), eta	Hs.654379	CD151||CD151 molecule (Raph blood group)			Hs.490394	SSBP1||Single-stranded DNA binding protein 1
Hs.213470|PSMB7	Hs.231411|TBRG4	Hs.208912|CENPM	Hs.491234|RIT1			Hs.655738	C9orf125||Chromosome 9 open reading frame 125	Hs.654427	DHODH||Dihydroorotate dehydrogenase			Hs.491232	SLC39A14||Solute carrier family 39 (zinc transporter), member 14
Hs.214142|MTHFR	Hs.231761|C14orf104	Hs.209945|TDP1	Hs.492516|PFDN2			Hs.655788	NDUFB2||NADH dehydrogenase (ubiquinone) 1 beta subcomplex, 2, 8kDa	Hs.654465	GCLC||Glutamate-cysteine ligase, catalytic subunit			Hs.491234	RIT1||Ras-like without CAAX 1
Hs.215766|GTPBP4	Hs.23198|C1orf31	Hs.209983|STMN1	Hs.492618|EXT1			Hs.656586	ADK||Adenosine kinase	Hs.654581	PRPS2||Phosphoribosyl pyrophosphate synthetase 2			Hs.492516	PFDN2||Prefoldin subunit 2
Hs.216226|SYNGR1	Hs.232021|REV3L	Hs.21187|TRUB1	Hs.494261|PSAT1			Hs.69089	GLA||Galactosidase, alpha	Hs.654727	RRP1B||Ribosomal RNA processing 1 homolog B (S. cerevisiae)			Hs.492618	EXT1||Exostoses (multiple) 1
Hs.216386|TMEM5	Hs.232375|ACAT1	Hs.2131|AVPR1A	Hs.494648|TEX10			Hs.695943	ARF4||ADP-ribosylation factor 4	Hs.655105	C14orf156||Chromosome 14 open reading frame 156			Hs.494261	PSAT1||Phosphoserine aminotransferase 1
Hs.21765|FADS3	Hs.233240|COL6A3	Hs.21413|SLC12A5	Hs.496255|PRKCZ			Hs.696283	NOP16||NOP16 nucleolar protein homolog (yeast)	Hs.655111	C3orf26||Chromosome 3 open reading frame 26			Hs.494648	TEX10||Testis expressed 10
Hs.2178|HIST2H2BE	Hs.233568|HIST1H2AL	Hs.216386|TMEM5	Hs.496646|IL13RA1			Hs.69851	GAR1||GAR1 ribonucleoprotein homolog (yeast)	Hs.655782	EIF2A||Eukaryotic translation initiation factor 2A, 65kDa			Hs.496255	PRKCZ||Protein kinase C, zeta
Hs.219140|NPPB	Hs.234249|MAPK8IP1	Hs.21765|FADS3	Hs.499839|RPL7A			Hs.699301	VDAC3||Voltage-dependent anion channel 3	Hs.68879	BMP4||Bone morphogenetic protein 4			Hs.496646	IL13RA1||Interleukin 13 receptor, alpha 1
Hs.221889|CSDA	Hs.234434|HEY1	Hs.21837|SEZ6	Hs.499839|RPL7A			Hs.702021	HSPA8||Heat shock 70kDa protein 8	Hs.696283	NOP16||NOP16 nucleolar protein homolog (yeast)			Hs.499839	RPL7A||Ribosomal protein L7a
Hs.222494|NOL10	Hs.235782|SLCO4A1	Hs.22065|CDC42SE1	Hs.502182|BDNF			Hs.706748	SLC2A1||Solute carrier family 2 (facilitated glucose transporter), member 1	Hs.69851	GAR1||GAR1 ribonucleoprotein homolog (yeast)			Hs.502182	BDNF||Brain-derived neurotrophic factor
Hs.223141|DDX21	Hs.235935|NOV	Hs.221472|FER	Hs.50252|MRPL32			Hs.707901	EMP1||Epithelial membrane protein 1	Hs.699301	VDAC3||Voltage-dependent anion channel 3			Hs.50252	MRPL32||Mitochondrial ribosomal protein L32
Hs.22616|KIAA0664	Hs.236030|SMARCC2	Hs.222510|DAZAP1	Hs.502829|SF1			Hs.708065	TXNRD1||Thioredoxin reductase 1	Hs.708127	SIP1||Survival of motor neuron protein interacting protein 1			Hs.502829	SF1||Splicing factor 1
Hs.226755|YWHAH	Hs.23642|SAC3D1	Hs.223141|DDX21	Hs.503284|ARRB1			Hs.709216	SCARB1||Scavenger receptor class B, member 1	Hs.709204	KHDRBS1||KH domain containing, RNA binding, signal transduction associated 1			Hs.503284	ARRB1||Arrestin, beta 1
Hs.227729|FKBP2	Hs.237028|NPR3	Hs.224008|FEZ1	Hs.503315|PRKRIR			Hs.715543	BCCIP||BRCA2 and CDKN1A interacting protein	Hs.709216	SCARB1||Scavenger receptor class B, member 1			Hs.503315	PRKRIR||Protein-kinase, interferon-inducible double stranded RNA dependent inhibitor, repressor of (P58 repressor)
Hs.227777|PTP4A1	Hs.237506|DNAJB5	Hs.22452|TMEM63C	Hs.503716|DCUN1D5			Hs.716416	EI24||Etoposide induced 2.4 mRNA	Hs.709327	UTP18||UTP18, small subunit (SSU) processome component, homolog (yeast)			Hs.503716	DCUN1D5||DCN1, defective in cullin neddylation 1, domain containing 5 (S. cerevisiae)
Hs.22824|MYBBP1A	Hs.237825|SRP72	Hs.224764|CRLS1	Hs.504687|MYL9			Hs.719078	SERBP1||SERPINE1 mRNA binding protein 1	Hs.709757	LSM8||LSM8 homolog, U6 small nuclear RNA associated (S. cerevisiae)			Hs.504687	MYL9||Myosin, light chain 9, regulatory
Hs.23119|TMEM187	Hs.239370|GPSM1	Hs.2258|MMP10	Hs.505154|FAM60A			Hs.719194	RAD51AP1||RAD51 associated protein 1	Hs.714318	RFC4||Replication factor C (activator 1) 4, 37kDa			Hs.505154	FAM60A||Family with sequence similarity 60, member A
Hs.23170|FTSJ1	Hs.239891|GPR35	Hs.22584|PDYN	Hs.505924|HMGA2			Hs.719200	IFRD2||Interferon-related developmental regulator 2	Hs.715543	BCCIP||BRCA2 and CDKN1A interacting protein			Hs.505924	HMGA2||High mobility group AT-hook 2
Hs.232375|ACAT1	Hs.24088|GIN1	Hs.225953|CAPN11	Hs.506989|RFC5			Hs.724	THRA||Thyroid hormone receptor, alpha (erythroblastic leukemia viral (v-erb-a) oncogene homolog, avian)	Hs.716416	EI24||Etoposide induced 2.4 mRNA			Hs.506989	RFC5||Replication factor C (activator 1) 5, 36.5kDa
Hs.233240|COL6A3	Hs.24119|NEK7	Hs.226390|RRM2	Hs.507515|OLFML2B			Hs.73291	WDR12||WD repeat domain 12	Hs.716515	BLM||Bloom syndrome, RecQ helicase-like			Hs.507515	OLFML2B||Olfactomedin-like 2B
Hs.235069|RECQL	Hs.243596|KATNAL1	Hs.22678|C10orf2	Hs.507584|POLR1D			Hs.74615	PDGFRA||Platelet-derived growth factor receptor, alpha polypeptide	Hs.71827	RRS1||RRS1 ribosome biogenesis regulator homolog (S. cerevisiae)			Hs.507584	POLR1D||Polymerase (RNA) I polypeptide D, 16kDa
Hs.235750|TIMM10	Hs.245540|ARL4A	Hs.230601|DNAJC19	Hs.507798|LHFP			Hs.75231	SLC16A1||Solute carrier family 16, member 1 (monocarboxylic acid transporter 1)	Hs.718626	KIF20A||Kinesin family member 20A			Hs.507798	LHFP||Lipoma HMGIC fusion partner
Hs.235992|ZNF234	Hs.24601|FBLN1	Hs.231411|TBRG4	Hs.511251|SQRDL			Hs.75318	TUBA4A||Tubulin, alpha 4a	Hs.718797	VGF||VGF nerve growth factor inducible			Hs.511251	SQRDL||Sulfide quinone reductase-like (yeast)
Hs.238990|CDKN1B	Hs.24763|RANBP1	Hs.231761|C14orf104	Hs.511816|GRPEL2			Hs.75438	QDPR||Quinoid dihydropteridine reductase	Hs.719078	SERBP1||SERPINE1 mRNA binding protein 1			Hs.511816	GRPEL2||GrpE-like 2, mitochondrial (E. coli)
Hs.239|FOXM1	Hs.248172|HIST1H4I	Hs.232054|SLC47A1	Hs.512152|HLA-G			Hs.75765	CXCL2||Chemokine (C-X-C motif) ligand 2	Hs.719200	IFRD2||Interferon-related developmental regulator 2			Hs.512152	HLA-G||Major histocompatibility complex, class I, G
Hs.239499|PDCD11	Hs.2490|CASP1	Hs.232721|UIMC1	Hs.513803|CYBA			Hs.76090	TNFAIP1||Tumor necrosis factor, alpha-induced protein 1 (endothelial)	Hs.719206	EEF1E1||Eukaryotic translation elongation factor 1 epsilon 1			Hs.513803	CYBA||Cytochrome b-245, alpha polypeptide
Hs.23960|CCNB1	Hs.249184|POU5F1	Hs.233119|ME2	Hs.514242|PLEKHM1			Hs.76884	ID3||Inhibitor of DNA binding 3, dominant negative helix-loop-helix protein	Hs.72550	HMMR||Hyaluronan-mediated motility receptor (RHAMM)			Hs.514242	PLEKHM1||Pleckstrin homology domain containing, family M (with RUN domain) member 1
Hs.240|KIF20B	Hs.250236|LCE1E	Hs.233160|STC2	Hs.514435|SF3B3			Hs.78771	PGK1||Phosphoglycerate kinase 1	Hs.73291	WDR12||WD repeat domain 12			Hs.514435	SF3B3||Splicing factor 3b, subunit 3, 130kDa
Hs.242947|DGKI	Hs.25040|ZNF239	Hs.233495|PLEKHA8	Hs.514870|ATP5F1			Hs.78944	RGS2||Regulator of G-protein signaling 2, 24kDa	Hs.73722	APEX1||APEX nuclease (multifunctional DNA repair enzyme) 1			Hs.514870	ATP5F1||ATP synthase, H+ transporting, mitochondrial F0 complex, subunit B1
Hs.24301|POLR2E	Hs.250615|CYP2A6	Hs.23439|C4orf32	Hs.515344|PDCD2L			Hs.79110	NCL||Nucleolin	Hs.74615	PDGFRA||Platelet-derived growth factor receptor, alpha polypeptide			Hs.515344	PDCD2L||Programmed cell death 2-like
Hs.243564|CD48	Hs.250666|HES1	Hs.234896|GMNN	Hs.516076|SNRPG			Hs.79334	NFIL3||Nuclear factor, interleukin 3 regulated	Hs.75231	SLC16A1||Solute carrier family 16, member 1 (monocarboxylic acid transporter 1)			Hs.516076	SNRPG||Small nuclear ribonucleoprotein polypeptide G
Hs.243678|SOX8	Hs.252229|MAFG	Hs.235782|SLCO4A1	Hs.516077|FAM136A			Hs.82432	GPD1L||Glycerol-3-phosphate dehydrogenase 1-like	Hs.77221	CHKA||Choline kinase alpha			Hs.516077	FAM136A||Family with sequence similarity 136, member A
Hs.243994|DEAF1	Hs.252451|SEMA3A	Hs.236828|WRNIP1	Hs.516155|CAPG			Hs.87752	MSN||Moesin	Hs.78769	THOP1||Thimet oligopeptidase 1			Hs.516155	CAPG||Capping protein (actin filament), gelsolin-like
Hs.244723|CCNE1	Hs.252549|CTSZ	Hs.237856|SLC15A3	Hs.517768|BRP44			Hs.91579	IMP4||IMP4, U3 small nucleolar ribonucleoprotein, homolog (yeast)	Hs.78944	RGS2||Regulator of G-protein signaling 2, 24kDa			Hs.517768	BRP44||Brain protein 44
Hs.246112|SNRNP200	Hs.253193|ZNF442	Hs.238303|PYROXD2	Hs.517815|CHCHD4					Hs.79081	PPP1CC||Protein phosphatase 1, catalytic subunit, gamma isoform			Hs.517815	CHCHD4||Coiled-coil-helix-coiled-coil-helix domain containing 4
Hs.246310|ATP5J	Hs.25333|IL1R2	Hs.239370|GPSM1	Hs.518611|TBC1D14					Hs.79110	NCL||Nucleolin			Hs.518611	TBC1D14||TBC1 domain family, member 14
Hs.246506|SLC25A4	Hs.25338|PRSS23	Hs.23960|CCNB1	Hs.518774|PAICS					Hs.79334	NFIL3||Nuclear factor, interleukin 3 regulated			Hs.518774	PAICS||Phosphoribosylaminoimidazole carboxylase, phosphoribosylaminoimidazole succinocarboxamide synthetase
Hs.24763|RANBP1	Hs.255935|BTG1	Hs.240|KIF20B	Hs.519568|P4HA2					Hs.79353	TFDP1||Transcription factor Dp-1			Hs.519568	P4HA2||Prolyl 4-hydroxylase, alpha polypeptide II
Hs.248179|HIST1H4D	Hs.255973|EID1	Hs.24119|NEK7	Hs.519672|TCOF1					Hs.82432	GPD1L||Glycerol-3-phosphate dehydrogenase 1-like			Hs.519672	TCOF1||Treacher Collins-Franceschetti syndrome 1
Hs.248815|WDR4	Hs.258429|ERCC5	Hs.241407|SERPINB13	Hs.520037|NEU1					Hs.82916	CCT6A||Chaperonin containing TCP1, subunit 6A (zeta 1)			Hs.520037	NEU1||Sialidase 1 (lysosomal sialidase)
Hs.2490|CASP1	Hs.26010|PFKP	Hs.2420|SOD3	Hs.520943|EIF4H					Hs.83758	CKS2||CDC28 protein kinase regulatory subunit 2			Hs.520943	EIF4H||Eukaryotic translation initiation factor 4H
Hs.249211|UCP1	Hs.262886|INPP5D	Hs.242014|CLRN3	Hs.521651|STMN2					Hs.90875	RABIF||RAB interacting factor			Hs.521651	STMN2||Stathmin-like 2
Hs.249227|ATP6V1G2	Hs.263671|RDX	Hs.2430|VPS72	Hs.522110|CREB3					Hs.93002	UBE2C||Ubiquitin-conjugating enzyme E2C			Hs.522110	CREB3||CAMP responsive element binding protein 3
Hs.249718|EIF4E	Hs.263812|NUDC	Hs.24379|TRAPPC1	Hs.522665|MAGED2					Hs.93574	HOXD3||Homeobox D3			Hs.522665	MAGED2||Melanoma antigen family D, 2
Hs.25040|ZNF239	Hs.264887|FGFR1	Hs.24510|C4orf26	Hs.522675|LAS1L									Hs.522675	LAS1L||LAS1-like (S. cerevisiae)
Hs.250666|HES1	Hs.26593|HDAC10	Hs.246413|RBM12	Hs.522891|CXCL12									Hs.522891	CXCL12||Chemokine (C-X-C motif) ligand 12 (stromal cell-derived factor 1)
Hs.2533|ALDH9A1	Hs.266223|SLC22A8	Hs.247362|DDAH2	Hs.523238|NOLC1									Hs.523238	NOLC1||Nucleolar and coiled-body phosphoprotein 1
Hs.25348|VAMP2	Hs.266873|GIPC3	Hs.248149|NEUROG1	Hs.523238|NOLC1									Hs.523446	COL11A1||Collagen, type XI, alpha 1
Hs.25363|PSEN2	Hs.26703|CNOT8	Hs.248153|CAPN5	Hs.523446|COL11A1									Hs.524630	UBE2N||Ubiquitin-conjugating enzyme E2N (UBC13 homolog, yeast)
Hs.254406|ABT1	Hs.269092|CDYL	Hs.248171|HIST3H3	Hs.524630|UBE2N									Hs.524828	ZNF664||Zinc finger protein 664
Hs.254560|DSCR6	Hs.269512|FSTL1	Hs.248172|HIST1H4I	Hs.524828|ZNF664									Hs.525232	LRP10||Low density lipoprotein receptor-related protein 10
Hs.255935|BTG1	Hs.269592|CC2D1A	Hs.249718|EIF4E	Hs.525232|LRP10									Hs.526902	RGMB||RGM domain family, member B
Hs.25597|ELOVL1	Hs.269909|C14orf147	Hs.24979|STYK1	Hs.526902|RGMB									Hs.530275	NIPSNAP3A||Nipsnap homolog 3A (C. elegans)
Hs.256549|NUBP2	Hs.27059|GMPPA	Hs.250666|HES1	Hs.530275|NIPSNAP3A									Hs.532082	IL6ST||Interleukin 6 signal transducer (gp130, oncostatin M receptor)
Hs.256667|PDK2	Hs.270845|KIF23	Hs.250822|AURKA	Hs.532082|IL6ST									Hs.532359	RPL5||Ribosomal protein L5
Hs.258563|FEZ2	Hs.270978|MEST	Hs.251531|PSMA4	Hs.532359|RPL5									Hs.533655	TYSND1||Trypsin domain containing 1
Hs.26010|PFKP	Hs.271695|NOB1	Hs.252451|SEMA3A	Hs.533655|TYSND1									Hs.534169	HSPA14||Heat shock 70kDa protein 14
Hs.262858|PNO1	Hs.272259|IGF2	Hs.252828|POP1	Hs.534169|HSPA14									Hs.534334	NOP2||NOP2 nucleolar protein homolog (yeast)
Hs.263812|NUDC	Hs.272822|RUVBL1	Hs.253247|OSR2	Hs.534334|NOP2									Hs.534385	THOC4||THO complex 4
Hs.264482|ATG12	Hs.272927|SEC23A	Hs.25338|PRSS23	Hs.534385|THOC4									Hs.534499	KRTAP1-5||Keratin associated protein 1-5
Hs.264887|FGFR1	Hs.274313|IGFBP6	Hs.25363|PSEN2	Hs.534499|KRTAP1-5									Hs.535901	BOP1||Block of proliferation 1
Hs.265174|RPL32	Hs.274402|HSPA1A	Hs.25450|SLC29A1	Hs.535901|BOP1									Hs.546269	RPL10A||Ribosomal protein L10a
Hs.26663|HERC5	Hs.274416|NDUFA6	Hs.256639|PPIH	Hs.546269|RPL10A									Hs.546286	RPS3||Ribosomal protein S3
Hs.269512|FSTL1	Hs.274772|RSL24D1	Hs.258212|TMEM159	Hs.546286|RPS3									Hs.546390	RPL26L1||Ribosomal protein L26-like 1
Hs.269898|SERTAD1	Hs.275086|PRDM10	Hs.258574|OR2C1	Hs.546392|PLAC8									Hs.546392	PLAC8||Placenta-specific 8
Hs.270|CYTIP	Hs.275243|S100A6	Hs.26006|PRMT6	Hs.555866|C1QBP									Hs.555866	C1QBP||Complement component 1, q subcomponent binding protein
Hs.270428|SUCLG1	Hs.276878|NUP93	Hs.260720|DNAJC12	Hs.557550|NPM1									Hs.557550	NPM1||Nucleophosmin (nucleolar phosphoprotein B23, numatrin)
Hs.270869|ZNF410	Hs.278277|OXCT1	Hs.26136|PIGY	Hs.558476|DNAJC2									Hs.558476	DNAJC2||DnaJ (Hsp40) homolog, subfamily C, member 2
Hs.270978|MEST	Hs.278432|MYH6	Hs.265174|RPL32	Hs.558499|CD320									Hs.558499	CD320||CD320 molecule
Hs.271135|ATP5C1	Hs.278573|CD59	Hs.26670|PIK3IP1	Hs.559718|AK5									Hs.559718	AK5||Adenylate kinase 5
Hs.271742|PARP3	Hs.278950|PCDHB1	Hs.26703|CNOT8	Hs.56|PRPS1									Hs.56	PRPS1||Phosphoribosyl pyrophosphate synthetase 1
Hs.271791|ATR	Hs.278959|GAL	Hs.267446|C4orf43	Hs.567385|PRC1									Hs.567385	PRC1||Protein regulator of cytokinesis 1
Hs.272168|SERINC3	Hs.279463|GDF2	Hs.268849|GLO1	Hs.567567|NCAPG									Hs.567567	NCAPG||Non-SMC condensin I complex, subunit G
Hs.272630|ATP6V1D	Hs.279746|TRPV2	Hs.268939|MATR3	Hs.567598|LBH									Hs.567598	LBH||Limb bud and heart development homolog (mouse)
Hs.274363|NGB	Hs.279836|COMMD9	Hs.269027|GALNT5	Hs.568613|SLC25A33									Hs.568613	SLC25A33||Solute carrier family 25, member 33
Hs.274416|NDUFA6	Hs.279908|TFB1M	Hs.269512|FSTL1	Hs.569713|CCDC45									Hs.569713	CCDC45||Coiled-coil domain containing 45
Hs.274430|SURF6	Hs.279929|TMED9	Hs.269909|C14orf147	Hs.570855|PDGFC									Hs.570855	PDGFC||Platelet derived growth factor C
Hs.274531|SKIV2L2	Hs.280130|RPS24	Hs.270291|ACTN4	Hs.572318|TIPIN									Hs.572318	TIPIN||TIMELESS interacting protein
Hs.274772|RSL24D1	Hs.280378|SNRPB2	Hs.270437|COL4A3BP	Hs.575032|MLF1IP									Hs.575032	MLF1IP||MLF1 interacting protein
Hs.275464|KLK10	Hs.280782|BEST3	Hs.271695|NOB1	Hs.57988|RHBDF1									Hs.57988	RHBDF1||Rhomboid 5 homolog 1 (Drosophila)
Hs.2764|NFKBIL1	Hs.281342|ADORA3	Hs.271791|ATR	Hs.5836|MRPS23									Hs.5836	MRPS23||Mitochondrial ribosomal protein S23
Hs.27744|RAB3A	Hs.281898|AIM2	Hs.272168|SERINC3	Hs.584801|SFRS2									Hs.584801	SFRS2||Splicing factor, arginine/serine-rich 2
Hs.278911|IL17C	Hs.2820|OXTR	Hs.27222|NHP2	Hs.585540|MAP6									Hs.585540	MAP6||Microtubule-associated protein 6
Hs.278959|GAL	Hs.282326|RCAN1	Hs.272350|IL26	Hs.585944|CHAC2									Hs.585944	CHAC2||ChaC, cation transport regulator homolog 2 (E. coli)
Hs.279209|CCDC41	Hs.282376|RPS4Y1	Hs.272630|ATP6V1D	Hs.590900|MRPS9									Hs.590900	MRPS9||Mitochondrial ribosomal protein S9
Hs.279257|PCMT1	Hs.282387|POLR3G	Hs.272795|CYP2W1	Hs.591133|FBN1									Hs.591133	FBN1||Fibrillin 1
Hs.279413|POLD1	Hs.283734|MRPL47	Hs.272822|RUVBL1	Hs.591347|TPD52L1									Hs.591347	TPD52L1||Tumor protein D52-like 1
Hs.2795|LDHA	Hs.283865|C20orf54	Hs.274313|IGFBP6	Hs.591506|MYCBP									Hs.591506	MYCBP||C-myc binding protein
Hs.279567|ZNF225	Hs.284217|TSHZ1	Hs.274415|PQLC3	Hs.591518|KDM1									Hs.591518	KDM1||Lysine (K)-specific demethylase 1
Hs.279806|DDX5	Hs.284244|FGF2	Hs.274430|SURF6	Hs.591712|ASB5									Hs.591712	ASB5||Ankyrin repeat and SOCS box-containing 5
Hs.280378|SNRPB2	Hs.284297|DUS3L	Hs.274531|SKIV2L2	Hs.591757|NDUFAF2									Hs.591757	NDUFAF2||NADH dehydrogenase (ubiquinone) 1 alpha subcomplex, assembly factor 2
Hs.281902|SUGT1	Hs.284491|PDXK	Hs.274772|RSL24D1	Hs.591761|HOMER1									Hs.591761	HOMER1||Homer homolog 1 (Drosophila)
Hs.282387|POLR3G	Hs.286226|MYO1C	Hs.275675|KATNB1	Hs.592116|FAM64A									Hs.592116	FAM64A||Family with sequence similarity 64, member A
Hs.282901|RBM39	Hs.287714|RAB32	Hs.275775|SEPP1	Hs.59236|ANKRD27									Hs.59236	ANKRD27||Ankyrin repeat domain 27 (VPS9 domain)
Hs.28326|COX15	Hs.288151|THOC7	Hs.27621|SEMA5A	Hs.594481|SERPINB2									Hs.594481	SERPINB2||Serpin peptidase inhibitor, clade B (ovalbumin), member 2
Hs.283565|FOSL1	Hs.288224|MRPL50	Hs.277035|MGLL	Hs.595053|HSPD1									Hs.595053	HSPD1||Heat shock 60kDa protein 1 (chaperonin)
Hs.283741|EXOSC5	Hs.288880|RDH14	Hs.278434|MED20	Hs.595072|TOMM22									Hs.595072	TOMM22||Translocase of outer mitochondrial membrane 22 homolog (yeast)
Hs.283844|SFXN3	Hs.288936|MRPL9	Hs.278573|CD59	Hs.602571|EXOSC3									Hs.602571	EXOSC3||Exosome component 3
Hs.284279|HMOX2	Hs.289044|GPX8	Hs.278959|GAL	Hs.604588|SMAD1									Hs.604588	SMAD1||SMAD family member 1
Hs.284292|UCRC	Hs.289271|CYC1	Hs.279245|TACC1	Hs.605445|ERRFI1									Hs.605445	ERRFI1||ERBB receptor feedback inhibitor 1
Hs.286221|ARF1	Hs.289347|DHRS3	Hs.279696|SUMF2	Hs.616962|GDF15									Hs.616962	GDF15||Growth differentiation factor 15
Hs.287362|TLE3	Hs.28988|GLRX	Hs.279837|GSTM2	Hs.62192|F3									Hs.62192	F3||Coagulation factor III (thromboplastin, tissue factor)
Hs.287374|ZNF304	Hs.291212|TBCA	Hs.279953|EPN1	Hs.624002|AGPAT5									Hs.623974	FBXL18||F-box and leucine-rich repeat protein 18
Hs.287717|PEMT	Hs.291363|CHEK2	Hs.280130|RPS24	Hs.624291|BAX									Hs.624002	AGPAT5||1-acylglycerol-3-phosphate O-acyltransferase 5 (lysophosphatidic acid acyltransferase, epsilon)
Hs.288034|SLC39A8	Hs.292156|DKK3	Hs.2820|OXTR	Hs.628152|ALPK2									Hs.624291	BAX||BCL2-associated X protein
Hs.288658|ZNF35	Hs.292177|SLC27A5	Hs.282376|RPS4Y1	Hs.631580|UBA2									Hs.62661	GBP1||Guanylate binding protein 1, interferon-inducible, 67kDa
Hs.289052|BCL2L12	Hs.292579|PTDSS1	Hs.282387|POLR3G	Hs.631967|CENPH									Hs.628152	ALPK2||Alpha-kinase 2
Hs.290404|SLC25A3	Hs.293818|NEIL2	Hs.282417|PYGL	Hs.632191|DCTPP1									Hs.631580	UBA2||Ubiquitin-like modifier activating enzyme 2
Hs.290758|DDB1	Hs.29444|MST150	Hs.282997|GBA	Hs.632282|SLC25A5									Hs.631967	CENPH||Centromere protein H
Hs.292026|EIF4E2	Hs.295563|C12orf45	Hs.283734|MRPL47	Hs.632535|SSB									Hs.632191	DCTPP1||DCTP pyrophosphatase 1
Hs.292493|XRCC6	Hs.296942|KRT34	Hs.283749|ANG	Hs.632717|MYL6									Hs.632282	SLC25A5||Solute carrier family 25 (mitochondrial carrier; adenine nucleotide translocator), member 5
Hs.292524|CCNH	Hs.29700|ZCCHC10	Hs.28491|SAT1	Hs.633087|									Hs.632535	SSB||Sjogren syndrome antigen B (autoantigen La)
Hs.292579|PTDSS1	Hs.29706|C14orf149	Hs.288034|SLC39A8	Hs.634680|GPN3									Hs.632717	MYL6||Myosin, light chain 6, alkali, smooth muscle and non-muscle
Hs.292689|USO1	Hs.29802|SLIT2	Hs.288224|MRPL50	Hs.643813|ITGB1									Hs.633087	||CDNA clone IMAGE:3878236
Hs.293411|AP4S1	Hs.298198|CMTM3	Hs.288348|KIAA1305	Hs.643951|PPM1G									Hs.634680	GPN3||GPN-loop GTPase 3
Hs.294041|EXOSC8	Hs.298345|SLBP	Hs.288658|ZNF35	Hs.644125|KCTD12									Hs.643813	ITGB1||Integrin, beta 1 (fibronectin receptor, beta polypeptide, antigen CD29 includes MDF2, MSK12)
Hs.297304|GLT8D1	Hs.298654|DUSP6	Hs.288940|TMEM8	Hs.646353|PSG11									Hs.643951	PPM1G||Protein phosphatase 1G (formerly 2C), magnesium-dependent, gamma isoform
Hs.298345|SLBP	Hs.299002|FBL	Hs.289106|EMID1	Hs.647086|REPIN1									Hs.644125	KCTD12||Potassium channel tetramerisation domain containing 12
Hs.299002|FBL	Hs.299055|GDI2	Hs.289271|CYC1	Hs.653262|ANGPTL2									Hs.646353	PSG11||Pregnancy specific beta-1-glycoprotein 11
Hs.29978|FXN	Hs.30011|TMEM93	Hs.292156|DKK3	Hs.653262|ANGPTL2									Hs.647086	REPIN1||Replication initiator 1
Hs.299878|DEGS1	Hs.300141|RPL39	Hs.292316|ASF1A	Hs.654415|PSG5									Hs.653262	ANGPTL2||Angiopoietin-like 2
Hs.3003|CD3E	Hs.301048|SEH1L	Hs.292524|CCNH	Hs.654415|PSG5									Hs.654415	PSG5||Pregnancy specific beta-1-glycoprotein 5
Hs.301404|RBM3	Hs.302016|PBOV1	Hs.292570|WDR85	Hs.654427|DHODH									Hs.654427	DHODH||Dihydroorotate dehydrogenase
Hs.301613|JTV1	Hs.302408|RNF138	Hs.293274|APCDD1	Hs.654543|TUBB2A									Hs.654543	TUBB2A||Tubulin, beta 2A
Hs.302435|AGAP2	Hs.30246|SLC19A2	Hs.293689|MCFD2	Hs.654568|KRT19									Hs.654568	KRT19||Keratin 19
Hs.30345|TRAP1	Hs.302742|MRPS6	Hs.294041|EXOSC8	Hs.654599|NUCB2									Hs.654599	NUCB2||Nucleobindin 2
Hs.303808|C2orf3	Hs.303090|PPP1R3C	Hs.294088|MND1	Hs.655105|C14orf156									Hs.655105	C14orf156||Chromosome 14 open reading frame 156
Hs.304081|KCNH4	Hs.30345|TRAP1	Hs.29444|MST150	Hs.655111|C3orf26									Hs.655111	C3orf26||Chromosome 3 open reading frame 26
Hs.304613|NDUFB4	Hs.303649|CCL2	Hs.295449|PVALB	Hs.655152|GALNTL4									Hs.655152	GALNTL4||UDP-N-acetyl-alpha-D-galactosamine:polypeptide N-acetylgalactosaminyltransferase-like 4
Hs.306123|MAGEF1	Hs.304249|UGCG	Hs.295563|C12orf45	Hs.6838|RND3									Hs.657345	LRRC2||Leucine rich repeat containing 2
Hs.306242|NOL7	Hs.30495|MRO	Hs.296942|KRT34	Hs.69499|TRIAP1									Hs.6838	RND3||Rho family GTPase 3
Hs.306307|ROCK1	Hs.306051|WNT5B	Hs.297343|CAMKK2	Hs.696283|NOP16									Hs.69499	TRIAP1||TP53 regulated inhibitor of apoptosis 1
Hs.306791|POLD2	Hs.306123|MAGEF1	Hs.298351|ASPSCR1	Hs.69851|GAR1									Hs.696283	NOP16||NOP16 nucleolar protein homolog (yeast)
Hs.307913|STX16	Hs.306212|ATP8B3	Hs.299002|FBL	Hs.699247|CRIM1									Hs.69851	GAR1||GAR1 ribonucleoprotein homolog (yeast)
Hs.30792|HOOK2	Hs.306339|SRPX2	Hs.300141|RPL39	Hs.699301|VDAC3									Hs.699247	CRIM1||Cysteine rich transmembrane BMP regulator 1 (chordin-like)
Hs.30824|LZTFL1	Hs.308613|MTERFD1	Hs.301048|SEH1L	Hs.700572|CYB5R3									Hs.699301	VDAC3||Voltage-dependent anion channel 3
Hs.309090|SFRS7	Hs.30868|RTN4R	Hs.301062|GALNT9	Hs.704007|RTN4									Hs.700572	CYB5R3||Cytochrome b5 reductase 3
Hs.30954|PMVK	Hs.309090|SFRS7	Hs.301478|CLMN	Hs.709216|SCARB1									Hs.704007	RTN4||Reticulon 4
Hs.309763|GRSF1	Hs.309288|CUGBP2	Hs.302408|RNF138	Hs.709416|SARS2									Hs.709216	SCARB1||Scavenger receptor class B, member 1
Hs.31016|MTF2	Hs.309763|GRSF1	Hs.303090|PPP1R3C	Hs.709550|CALML4									Hs.709416	SARS2||Seryl-tRNA synthetase 2, mitochondrial
Hs.310645|RAB1A	Hs.3100|KARS	Hs.303649|CCL2	Hs.709660|HSPB2									Hs.709550	CALML4||Calmodulin-like 4
Hs.311346|CMAS	Hs.310421|APBB1IP	Hs.303787|BCAP29	Hs.711|DEFA6									Hs.709660	HSPB2||Heat shock 27kDa protein 2
Hs.31210|BCL3	Hs.31082|TMEM33	Hs.303808|C2orf3	Hs.715543|BCCIP									Hs.711	DEFA6||Defensin, alpha 6, Paneth cell-specific
Hs.313544|GNL3	Hs.311190|MRPL14	Hs.306051|WNT5B	Hs.715555|SMS									Hs.715543	BCCIP||BRCA2 and CDKN1A interacting protein
Hs.314359|EIF3K	Hs.315137|AARS	Hs.306123|MAGEF1	Hs.715600|TSC22D2									Hs.715555	SMS||Spermine synthase
Hs.316890|SNX5	Hs.31595|CLDN11	Hs.306291|RNASEH2B	Hs.715731|CYP1B1									Hs.715600	TSC22D2||TSC22 domain family, member 2
Hs.321045|IKBKE	Hs.31720|HEPH	Hs.306791|POLD2	Hs.716416|EI24									Hs.715731	CYP1B1||Cytochrome P450, family 1, subfamily B, polypeptide 1
Hs.321541|RAB11A	Hs.317593|TMCO3	Hs.306814|LOXL4	Hs.719078|SERBP1									Hs.716416	EI24||Etoposide induced 2.4 mRNA
Hs.323342|ARPC4	Hs.318775|OSBPL6	Hs.308613|MTERFD1	Hs.719078|SERBP1									Hs.719078	SERBP1||SERPINE1 mRNA binding protein 1
Hs.324746|AHSG	Hs.3192|PCBD1	Hs.309090|SFRS7	Hs.719087|STRAP									Hs.719087	STRAP||Serine/threonine kinase receptor associated protein
Hs.3254|MRPL23	Hs.32148|SELS	Hs.310421|APBB1IP	Hs.719200|IFRD2									Hs.719200	IFRD2||Interferon-related developmental regulator 2
Hs.327794|STOML3	Hs.321541|RAB11A	Hs.31074|SGSH	Hs.719232|MRPL45									Hs.719232	MRPL45||Mitochondrial ribosomal protein L45
Hs.328232|GPC1	Hs.32196|MRPL36	Hs.310809|WDR3	Hs.719263|CCDC107									Hs.719263	CCDC107||Coiled-coil domain containing 107
Hs.329502|CASP9	Hs.322901|UTP3	Hs.311072|MRPS35	Hs.73291|WDR12									Hs.73291	WDR12||WD repeat domain 12
Hs.32959|GRK4	Hs.323562|MAGT1	Hs.311609|DDX39	Hs.74368|CKAP4									Hs.74368	CKAP4||Cytoskeleton-associated protein 4
Hs.330384|CORO1C	Hs.325321|WDR18	Hs.311640|RPS27A	Hs.74615|PDGFRA									Hs.74615	PDGFRA||Platelet-derived growth factor receptor, alpha polypeptide
Hs.330386|CHRNB1	Hs.325667|THSD1	Hs.311776|TCEAL3	Hs.75056|TIMM13									Hs.75056	TIMM13||Translocase of inner mitochondrial membrane 13 homolog (yeast)
Hs.331420|PPAT	Hs.326035|EGR1	Hs.312098|ADAM15	Hs.75231|SLC16A1									Hs.75231	SLC16A1||Solute carrier family 16, member 1 (monocarboxylic acid transporter 1)
Hs.332708|FBLN5	Hs.326556|ULBP3	Hs.313|SPP1	Hs.75317|SLC16A2									Hs.75317	SLC16A2||Solute carrier family 16, member 2 (monocarboxylic acid transporter 8)
Hs.334534|GNS	Hs.327527|SMARCA4	Hs.313544|GNL3	Hs.75724|MRPS22									Hs.75724	MRPS22||Mitochondrial ribosomal protein S22
Hs.334562|CDC2	Hs.327631|RDH13	Hs.316890|SNX5	Hs.76392|ALDH1A1									Hs.76392	ALDH1A1||Aldehyde dehydrogenase 1 family, member A1
Hs.334868|PPP2R5E	Hs.329266|HIP1	Hs.31712|RRAGD	Hs.789|CXCL1									Hs.77961	HLA-B||Major histocompatibility complex, class I, B
Hs.335084|FPGS	Hs.330463|FRMD4A	Hs.319334|NASP	Hs.78944|RGS2									Hs.789	CXCL1||Chemokine (C-X-C motif) ligand 1 (melanoma growth stimulating activity, alpha)
Hs.3352|HDAC2	Hs.330663|C12orf48	Hs.323489|PTCD3	Hs.79110|NCL									Hs.78944	RGS2||Regulator of G-protein signaling 2, 24kDa
Hs.336916|DAXX	Hs.331431|PDS5A	Hs.325321|WDR18	Hs.79334|NFIL3									Hs.79110	NCL||Nucleolin
Hs.338207|FRAP1	Hs.332197|PXDN	Hs.326035|EGR1	Hs.808|HNRNPF									Hs.79334	NFIL3||Nuclear factor, interleukin 3 regulated
Hs.33962|SNRNP40	Hs.332706|OPTN	Hs.330663|C12orf48	Hs.81791|TNFRSF11B									Hs.808	HNRNPF||Heterogeneous nuclear ribonucleoprotein F
Hs.339639|COX7A2L	Hs.333388|EEF1D	Hs.331420|PPAT	Hs.81892|KIAA0101									Hs.81791	TNFRSF11B||Tumor necrosis factor receptor superfamily, member 11b
Hs.34114|ATP1A2	Hs.334019|CR1	Hs.331431|PDS5A	Hs.82432|GPD1L									Hs.81892	KIAA0101||KIAA0101
Hs.343679|SFMBT1	Hs.334370|BEX1	Hs.332706|OPTN	Hs.85570|NLE1									Hs.82432	GPD1L||Glycerol-3-phosphate dehydrogenase 1-like
Hs.344400|MPHOSPH6	Hs.334515|ZSCAN10	Hs.332708|FBLN5	Hs.85769|DNTTIP2									Hs.85570	NLE1||Notchless homolog 1 (Drosophila)
Hs.346868|EBNA1BP2	Hs.334612|SNRPE	Hs.333125|FTHL17	Hs.85951|XPOT									Hs.85769	DNTTIP2||Deoxynucleotidyltransferase, terminal, interacting protein 2
Hs.348915|TTC33	Hs.334684|VPS26B	Hs.333823|MRPL13	Hs.878|SORD									Hs.85951	XPOT||Exportin, tRNA (nuclear export receptor for tRNAs)
Hs.349283|CBX5	Hs.337295|STIP1	Hs.334562|CDC2	Hs.90073|CSE1L									Hs.878	SORD||Sorbitol dehydrogenase
Hs.35086|USP1	Hs.343828|ZNF598	Hs.334587|RBPMS	Hs.95424|MAP4K1									Hs.90073	CSE1L||CSE1 chromosome segregation 1-like (yeast)
Hs.350966|PTTG1	Hs.344151|GOLGA4	Hs.334612|SNRPE	Hs.98008|GK2									Hs.95424	MAP4K1||Mitogen-activated protein kinase kinase kinase kinase 1
Hs.351296|UBXN1	Hs.344400|MPHOSPH6	Hs.33476|MICAL1										Hs.98008	GK2||Glycerol kinase 2
Hs.351875|COX6C	Hs.3447|TMEM98	Hs.334832|CYB5R1
Hs.352768|PSMB1	Hs.345849|SFT2D3	Hs.335034|DPYD
Hs.355643|RNPS1	Hs.346868|EBNA1BP2	Hs.335106|ZFYVE1
Hs.355927|VDAC2	Hs.347144|C6orf192	Hs.3352|HDAC2
Hs.355983|BZW1	Hs.348411|TYW3	Hs.335413|
Hs.356502|RPLP1	Hs.349111|MCAT	Hs.335550|TSEN2
Hs.356549|SNRPD3	Hs.350899|CAPN2	Hs.335551|DLAT
Hs.356624|NID1	Hs.351798|TBC1D8B	Hs.336564|SLC16A11
Hs.356769|MAN2B1	Hs.352225|HIST1H2AH	Hs.337295|STIP1
Hs.356873|RBM8A	Hs.352626|TMC2	Hs.337766|RPL18A
Hs.35947|MBD4	Hs.356231|SLC25A23	Hs.339831|PENK
Hs.363492|DDX18	Hs.356440|CCDC72	Hs.339845|PTH2
Hs.363572|CEPT1	Hs.356502|RPLP1	Hs.34024|TNIK
Hs.365116|U2AF1	Hs.356554|TRIT1	Hs.34333|CCBE1
Hs.365365|FECH	Hs.356873|RBM8A	Hs.343828|ZNF598
Hs.365706|MGP	Hs.363137|TCP1	Hs.346868|EBNA1BP2
Hs.36587|PPP1R7	Hs.363308|ORAI2	Hs.347144|C6orf192
Hs.367437|ATM	Hs.364980|STYX	Hs.348418|DR1
Hs.367833|SLC28A2	Hs.365116|U2AF1	Hs.348419|MUCL1
Hs.367842|MKI67IP	Hs.367854|PRMT5	Hs.35086|USP1
Hs.367854|PRMT5	Hs.367879|C15orf32	Hs.350966|PTTG1
Hs.367992|IMPA2	Hs.367900|PDCD2	Hs.352|FOLR3
Hs.368078|DNAJA2	Hs.368096|KIF26B	Hs.352155|RLN3
Hs.368149|CCT7	Hs.368255|KIAA0368	Hs.35433|CDC42BPA
Hs.368376|SRPR	Hs.368404|EXT2	Hs.355455|ANKRD57
Hs.368587|PRLR	Hs.368431|RUNX1T1	Hs.355643|RNPS1
Hs.368642|EPB42	Hs.368710|CCDC99	Hs.355750|TAF1D
Hs.368996|RLN1	Hs.368733|RGS20	Hs.355820|CITED4
Hs.36927|HSPH1	Hs.368912|DPP4	Hs.355934|SFPQ
Hs.369373|SEC23B	Hs.368971|NCOA6	Hs.356549|SNRPD3
Hs.369430|PAM	Hs.369017|RAB2A	Hs.356554|TRIT1
Hs.369440|SFXN1	Hs.369056|SP100	Hs.356572|RPS3A
Hs.369607|GAK	Hs.369068|DYNC1LI2	Hs.356873|RBM8A
Hs.369614|COPS2	Hs.369091|SNX25	Hs.36053|C5orf13
Hs.369779|SIRT1	Hs.369397|TGFBI	Hs.362702|CCDC138
Hs.369920|RAP1B	Hs.369430|PAM	Hs.363137|TCP1
Hs.37035|MNX1	Hs.369488|DSCR3	Hs.363492|DDX18
Hs.370422|VLDLR	Hs.369840|NID2	Hs.365116|U2AF1
Hs.37044|PRPH	Hs.370166|WSCD1	Hs.367842|MKI67IP
Hs.370504|RPS15A	Hs.370254|BAD	Hs.367900|PDCD2
Hs.370771|CDKN1A	Hs.370379|ZNF462	Hs.367935|RPS2P32
Hs.37092|FGF3	Hs.370503|FYB	Hs.368011|MRRF
Hs.371001|EIF3B	Hs.370510|CADM1	Hs.368084|LRPPRC
Hs.371240|AKAP12	Hs.370725|OSBPL1A	Hs.368160|PCDHGC3
Hs.371249|PTN	Hs.371001|EIF3B	Hs.368260|ATAD4
Hs.371282|TCF3	Hs.371016|TBC1D2	Hs.368402|C8orf55
Hs.371350|HLCS	Hs.371914|BLMH	Hs.368433|TPD52
Hs.371372|SDCCAG10	Hs.372265|BXDC1	Hs.368598|ZC3H15
Hs.37138|ZNF85	Hs.372309|C10orf84	Hs.368783|NAT5
Hs.371594|MKNK1	Hs.372579|VASN	Hs.368805|HAAO
Hs.371720|SYK	Hs.372914|NDRG1	Hs.368912|DPP4
Hs.371914|BLMH	Hs.373074|CRYBB2	Hs.369056|SP100
Hs.371987|NFAT5	Hs.373498|SLC22A17	Hs.36927|HSPH1
Hs.372031|PMP22	Hs.373741|HM13	Hs.369422|MXRA5
Hs.372616|ARL1	Hs.373857|KLF12	Hs.369520|SYTL2
Hs.373642|PRDM8	Hs.373947|KIF9	Hs.369606|CPSF6
Hs.374127|CDC16	Hs.374191|LEPREL1	Hs.369675|ANGPT1
Hs.376064|NOP56	Hs.374485|ZNF706	Hs.369755|INPP5F
Hs.376071|CCND2	Hs.374596|TPT1	Hs.37009|ALPI
Hs.376206|KLF4	Hs.374774|ANKRD29	Hs.370166|WSCD1
Hs.376208|LTB	Hs.374950|MT1X	Hs.370504|RPS15A
Hs.377010|CAD	Hs.375129|MMP3	Hs.370549|BCL11A
Hs.377257|RBM45	Hs.376064|NOP56	Hs.37055|FGF5
Hs.378103|RPS5	Hs.37616|STRA13	Hs.37058|CALCA
Hs.37860|KLF1	Hs.377484|BAG1	Hs.370858|FUCA1
Hs.380135|FABP1	Hs.377705|ZNF692	Hs.371016|TBC1D2
Hs.381061|RPL19	Hs.379466|UBE2A	Hs.371199|SGCE
Hs.381072|PPIF	Hs.380027|C1orf61	Hs.371282|TCF3
Hs.381167|SERPINB1	Hs.380906|MYADM	Hs.371914|BLMH
Hs.381189|CBX3	Hs.380920|C4orf46	Hs.372331|SPTAN1
Hs.381219|RPL15	Hs.381072|PPIF	Hs.373498|SLC22A17
Hs.382865|PLD1	Hs.381099|LCP1	Hs.373857|KLF12
Hs.386567|GBP2	Hs.381189|CBX3	Hs.3745|MFGE8
Hs.388004|AHCY	Hs.381300|C6orf1	Hs.374950|MT1X
Hs.388034|RXRB	Hs.383108|	Hs.375129|MMP3
Hs.388927|YY1	Hs.38449|SERPINE2	Hs.376064|NOP56
Hs.389171|PINK1	Hs.384598|SERPING1	Hs.377010|CAD
Hs.389277|ARFRP1	Hs.387207|SGCD	Hs.377070|GRIA3
Hs.389649|EIF4A3	Hs.387208|FAU	Hs.378103|RPS5
Hs.389700|MGST1	Hs.3873|PPT1	Hs.37916|DPP7
Hs.391860|ADCY9	Hs.387804|PABPC1	Hs.380118|RBMX
Hs.396393|UBE2S	Hs.387995|GLT25D2	Hs.380801|PCNXL3
Hs.397609|RPS16	Hs.388004|AHCY	Hs.380857|RCC2
Hs.397638|WDR5	Hs.388170|TSR1	Hs.380906|MYADM
Hs.39925|ETFA	Hs.388668|KLHL2	Hs.380933|RPL22L1
Hs.400740|PPP2R4	Hs.388918|RECK	Hs.380953|RPL38
Hs.403790|SLC25A28	Hs.388927|YY1	Hs.381123|RPL21
Hs.404321|GARS	Hs.389037|MCM3AP	Hs.381189|CBX3
Hs.405153|NOD1	Hs.389734|TCEAL8	Hs.381219|RPL15
Hs.405610|MBD1	Hs.396644|	Hs.381222|hCG_20426
Hs.405958|CDC6	Hs.397465|HIPK2	Hs.382044|MRPS2
Hs.406157|HSF2BP	Hs.398111|C13orf27	Hs.384598|SERPING1
Hs.406300|RPL23	Hs.398157|PLK2	Hs.38512|ZNF777
Hs.406510|ATP5B	Hs.398989|BEX2	Hs.3873|PPT1
Hs.406678|ACSL1	Hs.399952|ZNF681	Hs.387601|FOXRED2
Hs.406683|RPS15	Hs.40098|GREM1	Hs.387804|PABPC1
Hs.407995|MIF	Hs.401842|RSL1D1	Hs.388004|AHCY
Hs.408257|NDUFS6	Hs.404321|GARS	Hs.388170|TSR1
Hs.408528|RB1	Hs.40499|DKK1	Hs.388364|RNF175
Hs.408767|CRYAB	Hs.405144|SFRS3	Hs.388733|PNPT1
Hs.408909|GOLPH3	Hs.4055|KLF6	Hs.388739|XRCC5
Hs.409065|FEN1	Hs.405610|MBD1	Hs.389649|EIF4A3
Hs.409140|ATP5O	Hs.405692|CCDC53	Hs.389996|CHCHD2
Hs.409412|PARP2	Hs.406062|NDUFA11	Hs.396644|
Hs.409965|PNN	Hs.406423|SF3B2	Hs.397465|HIPK2
Hs.410406|SMARCAD1	Hs.406708|LILRA4	Hs.397609|RPS16
Hs.410455|UNC119	Hs.406890|ANKS6	Hs.398157|PLK2
Hs.410817|RPL13	Hs.407955|ICT1	Hs.399984|WDR75
Hs.412117|ANXA6	Hs.408061|FABP5	Hs.40098|GREM1
Hs.412482|TTC4	Hs.408434|COPZ2	Hs.401537|SPPL2A
Hs.413099|GLRA3	Hs.409578|STK38	Hs.401842|RSL1D1
Hs.413366|AP4E1	Hs.409602|SULF1	Hs.401903|COX5A
Hs.414795|SERPINE1	Hs.410388|LACTB	Hs.401929|DNASE1L1
Hs.416755|LARP6	Hs.410977|TAGLN	Hs.402752|TAF15
Hs.41690|DSC3	Hs.412196|IFT57	Hs.4029|YEATS4
Hs.417077|CYP51A1	Hs.412462|R3HDM1	Hs.404056|EIF3J
Hs.417549|PTPN1	Hs.412710|NPHS2	Hs.404802|HDAC11
Hs.417816|MAGEA3	Hs.412842|CDC123	Hs.40499|DKK1
Hs.418167|ALB	Hs.413297|RGS16	Hs.405144|SFRS3
Hs.42146|PAX3	Hs.413812|RAC1	Hs.405590|EIF3E
Hs.421576|MAGOH	Hs.414795|SERPINE1	Hs.405925|PSRC1
Hs.421608|EEF1B2	Hs.415299|ITPA	Hs.406300|RPL23
Hs.42215|PPP1R3D	Hs.415414|FAM104B	Hs.406590|MRFAP1
Hs.422662|VRK1	Hs.416755|LARP6	Hs.408018|RPL36
Hs.422986|ANXA4	Hs.41683|ALX1	Hs.408061|FABP5
Hs.423348|MEN1	Hs.418416|ZC3H8	Hs.408434|COPZ2
Hs.424932|AIFM1	Hs.419463|RPL23A	Hs.408767|CRYAB
Hs.425311|LSM1	Hs.419815|EGF	Hs.408846|SEMA4A
Hs.429|ATP5G3	Hs.420483|BCHE	Hs.409065|FEN1
Hs.42957|METTL1	Hs.421194|TPST1	Hs.409412|PARP2
Hs.430075|COX7C	Hs.421245|IK	Hs.409602|SULF1
Hs.430435|NUP54	Hs.421576|MAGOH	Hs.409934|HLA-DQB1
Hs.430733|CLNS1A	Hs.421621|COX7A1	Hs.409965|PNN
Hs.431048|ABL1	Hs.421622|WIPF2	Hs.410026|BCL2L2
Hs.431307|MRPL40	Hs.422113|ZNF511	Hs.410477|PLA2R1
Hs.431792|GAS8	Hs.424908|LSM5	Hs.410970|MYL5
Hs.432330|RRAGA	Hs.425125|RPL29	Hs.410977|TAGLN
Hs.432424|TPP2	Hs.4253|CCDC86	Hs.411125|MRPS12
Hs.432485|RPL36A	Hs.426296|C10orf104	Hs.411865|IPO4
Hs.432574|POLR2H	Hs.426312|AMOTL2	Hs.412462|R3HDM1
Hs.432674|LARS	Hs.426410|GPIHBP1	Hs.412587|RAD51C
Hs.432822|MAN2A1	Hs.42949|HES6	Hs.412707|HPRT1
Hs.433060|ACPP	Hs.429666|CEBPG	Hs.412939|ELOVL6
Hs.433180|GINS2	Hs.430075|COX7C	Hs.413297|RGS16
Hs.433222|NPC2	Hs.430551|IQGAP1	Hs.413678|ZNF830
Hs.433427|RPS17	Hs.430733|CLNS1A	Hs.414332|OAS2
Hs.433512|ACTR3	Hs.431109|STX8	Hs.414407|NDC80
Hs.433529|RPS11	Hs.431307|MRPL40	Hs.414795|SERPINE1
Hs.433750|EIF4G1	Hs.431400|RAI14	Hs.419463|RPL23A
Hs.433759|BANF1	Hs.432132|G0S2	Hs.419640|PARK7
Hs.434980|APP	Hs.432330|RRAGA	Hs.4205|PCDH24
Hs.435126|SLC2A4RG	Hs.432442|SLC34A3	Hs.420696|MRPL39
Hs.435136|TXN	Hs.432574|POLR2H	Hs.421194|TPST1
Hs.435166|LBR	Hs.432642|MAPK12	Hs.421509|CCT4
Hs.435512|PPP3CA	Hs.432674|LARS	Hs.421621|COX7A1
Hs.435661|SPTLC2	Hs.432676|MUC16	Hs.424312|PDLIM4
Hs.435735|SLC5A6	Hs.433278|EBPL	Hs.424414|MSX1
Hs.435767|PCYT1A	Hs.433307|BCKDHA	Hs.424908|LSM5
Hs.435811|ARRB2	Hs.433391|MT1G	Hs.425125|RPL29
Hs.436031|IREB2	Hs.433419|COX4I1	Hs.4253|CCDC86
Hs.436100|NOTCH4	Hs.433466|C2orf56	Hs.425427|LYAR
Hs.436186|CAST	Hs.433512|ACTR3	Hs.42645|SLC16A6
Hs.436204|ARFGAP2	Hs.433732|CLK1	Hs.428027|PBX3
Hs.43627|SOX12	Hs.433863|PEBP1	Hs.42949|HES6
Hs.436405|IDH3B	Hs.434044|PRKCDBP	Hs.42957|METTL1
Hs.436446|ARMET	Hs.434081|PSME2	Hs.429666|CEBPG
Hs.436564|PREP	Hs.434914|FRMD6	Hs.430075|COX7C
Hs.436578|POLR2F	Hs.434953|HMGB2	Hs.430199|CCDC142
Hs.436896|POLR3A	Hs.435013|VGLL3	Hs.430435|NUP54
Hs.437153|MLXIP	Hs.435044|TBC1D22A	Hs.430733|CLNS1A
Hs.437277|SQSTM1	Hs.435126|SLC2A4RG	Hs.432132|G0S2
Hs.437451|PLA1A	Hs.435166|LBR	Hs.432395|GPR39
Hs.437594|RPLP2	Hs.435215|VEGFC	Hs.432574|POLR2H
Hs.437656|LEPRE1	Hs.435458|SETBP1	Hs.432674|LARS
Hs.437705|CDC25A	Hs.435735|SLC5A6	Hs.432752|POGK
Hs.437905|SPIB	Hs.435759|THAP4	Hs.432948|ORC5L
Hs.43803|LAIR2	Hs.435850|LYPLA1	Hs.433222|NPC2
Hs.43812|STX10	Hs.435933|PHF10	Hs.433278|EBPL
Hs.438429|RPS19	Hs.435948|ATAD1	Hs.433427|RPS17
Hs.438489|ATP5S	Hs.435949|IKZF1	Hs.433529|RPS11
Hs.438720|MCM7	Hs.436093|BAT2	Hs.433839|EEF1A2
Hs.438993|BCAT1	Hs.436102|AEN	Hs.434044|PRKCDBP
Hs.438994|ZNF544	Hs.436161|MRPS18C	Hs.434059|ETV4
Hs.439620|MYO1B	Hs.436329|SCRIB	Hs.434213|C9orf89
Hs.439815|HBXIP	Hs.436439|TWF2	Hs.434886|CDCA5
Hs.440320|CUL5	Hs.436495|MEX3D	Hs.434888|RNF44
Hs.440371|CCDC76	Hs.436803|VBP1	Hs.434953|HMGB2
Hs.440525|TIMM9	Hs.436873|ITGAV	Hs.435004|SEC23IP
Hs.440599|DDX1	Hs.437060|CYCS	Hs.435013|VGLL3
Hs.440604|PSMD7	Hs.437403|PPA1	Hs.435166|LBR
Hs.440833|PKN2	Hs.437444|CACNA1E	Hs.435215|VEGFC
Hs.440896|SLC9A3R2	Hs.437638|XBP1	Hs.435326|ACTL6A
Hs.441047|ADM	Hs.438231|TFPI2	Hs.435369|FHL1
Hs.441664|TSPAN7	Hs.438336|C2orf30	Hs.435500|C8orf38
Hs.441737|JPH2	Hs.438462|MT1H	Hs.435735|SLC5A6
Hs.443057|CD53	Hs.438723|SLC27A3	Hs.435850|LYPLA1
Hs.443258|SREBF2	Hs.438782|HDAC5	Hs.435933|PHF10
Hs.443625|COL3A1	Hs.438863|NR1H3	Hs.435967|TADA1L
Hs.443723|GRPEL1	Hs.438918|ACVR1B	Hs.436187|TRIP13
Hs.443861|SRPK1	Hs.438953|SGCB	Hs.43627|SOX12
Hs.443874|SLC6A1	Hs.439309|TMPRSS2	Hs.436367|LAMA3
Hs.443914|SOD1	Hs.439312|PLTP	Hs.436448|FOXC2
Hs.443960|DDX11	Hs.439370|MRI1	Hs.436527|ANAPC1
Hs.44402|CSTF3	Hs.439524|TRMU	Hs.436564|PREP
Hs.444118|MCM6	Hs.440599|DDX1	Hs.436618|C12orf24
Hs.444213|TLE4	Hs.441047|ADM	Hs.436944|SPRY1
Hs.444247|RP6-213H19.1	Hs.442199|NOL8	Hs.437060|CYCS
Hs.444451|ZAK	Hs.442707|TERF1	Hs.437084|NKRF
Hs.444468|CTDSP1	Hs.44298|MRPS17	Hs.437191|PTRF
Hs.444619|LAGE3	Hs.443625|COL3A1	Hs.437403|PPA1
Hs.444931|MED17	Hs.443673|R3HDM2	Hs.437941|C14orf106
Hs.444947|TRIB1	Hs.443723|GRPEL1	Hs.438227|RPL34
Hs.444986|METAP2	Hs.443861|SRPK1	Hs.438231|TFPI2
Hs.445040|ACADM	Hs.443914|SOD1	Hs.438720|MCM7
Hs.445403|IARS	Hs.44402|CSTF3	Hs.438872|C6orf72
Hs.445534|PER1	Hs.444099|AADACL1	Hs.438953|SGCB
Hs.445570|CD63	Hs.444118|MCM6	Hs.439145|SCN9A
Hs.445757|CR2	Hs.444157|PPHLN1	Hs.439726|LAMB2
Hs.446079|CPD	Hs.444200|BPTF	Hs.439991|TMEM177
Hs.446149|LDHB	Hs.444213|TLE4	Hs.44024|MRPL19
Hs.446260|PSMA6	Hs.44439|SOCS6	Hs.440382|TRIM27
Hs.446352|ERBB2	Hs.444488|SPP2	Hs.440494|CMTM7
Hs.446374|PFDN6	Hs.444619|LAGE3	Hs.440525|TIMM9
Hs.446414|CD47	Hs.444986|METAP2	Hs.440599|DDX1
Hs.446427|OAZ1	Hs.445272|GTF2E1	Hs.441047|ADM
Hs.446445|YIF1A	Hs.445351|LGALS1	Hs.441488|TRIM41
Hs.446588|RPS13	Hs.445403|IARS	Hs.441975|XAF1
Hs.44685|RNF141	Hs.445570|CD63	Hs.443021|HIST1H3E
Hs.44693|MKLN1	Hs.445758|E2F5	Hs.443465|TCERG1
Hs.449630|HBA1	Hs.445803|OSTC	Hs.443551|C1orf112
Hs.458272|MPO	Hs.445827|COL5A2	Hs.443650|KDM5B
Hs.458360|UCK2	Hs.446149|LDHB	Hs.443831|PDCD5
Hs.458917|SCAMP2	Hs.446352|ERBB2	Hs.443861|SRPK1
Hs.459149|BTBD1	Hs.446392|DYNLT3	Hs.443881|PAXIP1
Hs.459265|ISG20	Hs.446427|OAZ1	Hs.443948|IL8
Hs.459691|PDPK1	Hs.446445|YIF1A	Hs.44402|CSTF3
Hs.459927|PTMA	Hs.446559|PCNX	Hs.444028|CKAP2
Hs.460179|SMG1	Hs.446574|TMSB10	Hs.444046|NETO2
Hs.461361|CFDP1	Hs.447794|APIP	Hs.444082|EZH2
Hs.463456|NME1	Hs.448003|NSUN3	Hs.444099|AADACL1
Hs.463506|AKAP1	Hs.449291|ISCA1	Hs.444106|TOR2A
Hs.463511|H6PD	Hs.450230|IGFBP3	Hs.444118|MCM6
Hs.463642|RPS6KB1	Hs.454640|LOC727751	Hs.444236|SPATA16
Hs.463797|MRTO4	Hs.458283|GLRX2	Hs.44424|SLC6A15
Hs.464137|ACOX1	Hs.458360|UCK2	Hs.444279|GPBP1
Hs.464210|SYNGR2	Hs.458377|ZNF329	Hs.444520|DHX35
Hs.464829|CDH2	Hs.458397|AMAC1L2	Hs.444663|GJD3
Hs.464971|PIK3C3	Hs.458485|ISG15	Hs.444851|CNOT10
Hs.465087|SMAD7	Hs.458487|KIAA0391	Hs.444915|SLC1A1
Hs.465413|CYB5A	Hs.458499|USP3	Hs.444931|MED17
Hs.465498|TXNL4A	Hs.458598|UTP14A	Hs.444969|MEMO1
Hs.465607|APBA3	Hs.458747|ANP32A	Hs.444986|METAP2
Hs.465744|INSR	Hs.458973|ZFHX4	Hs.445052|MSH6
Hs.465870|KEAP1	Hs.459049|MTHFS	Hs.445098|DEPDC1
Hs.466471|GPI	Hs.459153|BNC1	Hs.445245|KRTAP5-8
Hs.466507|LSR	Hs.459652|TMEM204	Hs.445705|RRM1
Hs.466775|SNRPA	Hs.459790|VPS13A	Hs.445757|CR2
Hs.466871|PLAUR	Hs.459927|PTMA	Hs.445758|E2F5
Hs.46700|ING1	Hs.460499|ATXN2L	Hs.445977|GTF3A
Hs.467020|BBC3	Hs.460996|TRADD	Hs.446083|PTPRD
Hs.467192|PPP2R1A	Hs.461113|CIRH1A	Hs.446149|LDHB
Hs.467701|ODC1	Hs.461178|EIF1AY	Hs.446357|FAM177A1
Hs.467960|RAB10	Hs.461420|MSRB2	Hs.446588|RPS13
Hs.468091|SPAST	Hs.461722|TRAPPC2L	Hs.448497|PODNL1
Hs.468415|PIGF	Hs.461775|CPNE7	Hs.448572|KLHL34
Hs.468442|CALM2	Hs.461925|RPA1	Hs.450230|IGFBP3
Hs.469030|MTHFD2	Hs.462341|MPRIP	Hs.458280|PABPC3
Hs.469264|RPIA	Hs.462379|TOM1L2	Hs.458355|C1S
Hs.469473|RPL31	Hs.462392|ALKBH5	Hs.458360|UCK2
Hs.469694|ZNF134	Hs.462998|IGFBP4	Hs.458414|IFITM1
Hs.469723|RCC1	Hs.463416|XYLT2	Hs.458485|ISG15
Hs.470233|ARL5A	Hs.463421|ABCC3	Hs.458499|USP3
Hs.470654|CDCA7	Hs.463456|NME1	Hs.458598|UTP14A
Hs.470907|AK2	Hs.463797|MRTO4	Hs.458747|ANP32A
Hs.471207|NDUFS1	Hs.463964|WIPI1	Hs.459927|PTMA
Hs.471221|KLF7	Hs.464416|USP14	Hs.460|ATF3
Hs.472437|MAPRE1	Hs.464422|COLEC12	Hs.460298|POLR3E
Hs.472737|TOP1	Hs.464734|SNRPD1	Hs.460978|NAE1
Hs.473087|CTPS	Hs.464829|CDH2	Hs.460988|CBFB
Hs.473470|GABPA	Hs.464896|ZNF397OS	Hs.460996|TRADD
Hs.47357|CH25H	Hs.464971|PIK3C3	Hs.462316|TTC19
Hs.473632|SYNJ1	Hs.465087|SMAD7	Hs.462379|TOM1L2
Hs.473648|GART	Hs.465374|EFHD2	Hs.462640|DNAJC11
Hs.473838|PSMG1	Hs.465413|CYB5A	Hs.462732|SUZ12
Hs.474185|DGCR6	Hs.465498|TXNL4A	Hs.462998|IGFBP4
Hs.474643|C22orf28	Hs.465645|C19orf10	Hs.463045|KAT2A
Hs.4747|DKC1	Hs.465870|KEAP1	Hs.463483|MMD
Hs.474949|RBX1	Hs.465929|CNN1	Hs.463506|AKAP1
Hs.474980|PHF5A	Hs.466539|CLIP3	Hs.463936|NOL11
Hs.475125|ATXN10	Hs.466919|GEMIN7	Hs.463964|WIPI1
Hs.476217|PFKFB4	Hs.467020|BBC3	Hs.465144|MEX3C
Hs.476415|APPL1	Hs.467151|JOSD2	Hs.465778|FCER2
Hs.477273|ZNF593	Hs.467304|IL11	Hs.465808|HNRNPM
Hs.477352|PDIA5	Hs.467701|ODC1	Hs.465929|CNN1
Hs.477789|ATP1B3	Hs.467751|TRIB2	Hs.466539|CLIP3
Hs.477879|H2AFX	Hs.467753|C1QC	Hs.466693|SIRT2
Hs.478000|MBNL1	Hs.468410|EPAS1	Hs.466775|SNRPA
Hs.478067|LXN	Hs.469030|MTHFD2	Hs.466917|SFRS16
Hs.478150|PDCD10	Hs.469264|RPIA	Hs.467701|ODC1
Hs.478407|FXR1	Hs.469615|38604	Hs.467751|TRIB2
Hs.478673|IL1RAP	Hs.469723|RCC1	Hs.468058|GALNT14
Hs.479122|ACOX3	Hs.469881|LIMS2	Hs.468410|EPAS1
Hs.479693|SFRS11	Hs.470553|METTL5	Hs.468426|SOCS5
Hs.479874|ZNF136	Hs.470907|AK2	Hs.46850|GNPTAB
Hs.480073|HNRNPD	Hs.471014|TLN1	Hs.469030|MTHFD2
Hs.480190|AFF1	Hs.471040|C2orf69	Hs.469134|LOC129293
Hs.480356|VPS52	Hs.471104|NOP58	Hs.469264|RPIA
Hs.480815|SCOC	Hs.471200|NRP2	Hs.469649|BUB1
Hs.480876|ANAPC10	Hs.471221|KLF7	Hs.469723|RCC1
Hs.481186|CLCN3	Hs.471401|BCS1L	Hs.470457|COBLL1
Hs.482562|F2R	Hs.471610|ARMC9	Hs.470654|CDCA7
Hs.482587|SCAMP1	Hs.47166|C3orf14	Hs.471104|NOP58
Hs.483305|HINT1	Hs.471768|STK40	Hs.471452|FARSB
Hs.483494|ETF1	Hs.472038|UTP11L	Hs.471783|RAMP1
Hs.483873|GM2A	Hs.472101|PLCB4	Hs.471873|DTYMK
Hs.484288|DDX41	Hs.472213|RRBP1	Hs.472010|PRNP
Hs.484551|MDM2	Hs.473583|YBX1	Hs.472038|UTP11L
Hs.484782|DFFA	Hs.473648|GART	Hs.472716|FAM83D
Hs.485075|CCHCR1	Hs.473838|PSMG1	Hs.472877|EYA2
Hs.485130|HLA-DPB1	Hs.474018|ADARB1	Hs.473082|ZFP64
Hs.485518|CD2AP	Hs.474206|HIRA	Hs.473087|CTPS
Hs.485628|ZNF451	Hs.475353|LMCD1	Hs.473256|LAMA5
Hs.486502|NRAS	Hs.475663|RAB5A	Hs.473286|GMEB2
Hs.486696|EPM2A	Hs.475970|OXSR1	Hs.473648|GART
Hs.487062|IGF2R	Hs.476218|COL7A1	Hs.473838|PSMG1
Hs.487296|PHGDH	Hs.476365|SCP2	Hs.474053|COL6A1
Hs.487341|GNA12	Hs.476415|APPL1	Hs.474206|HIRA
Hs.487774|HNRNPA2B1	Hs.477114|PHLDB2	Hs.474217|CDC45L
Hs.489040|SRI	Hs.477128|CCDC80	Hs.4747|DKC1
Hs.489142|COL1A2	Hs.477481|MCM2	Hs.474737|APOL3
Hs.489207|ASNS	Hs.477879|H2AFX	Hs.474980|PHF5A
Hs.489615|NAMPT	Hs.477892|GYG1	Hs.475392|TMEM111
Hs.490203|CALD1	Hs.478067|LXN	Hs.475401|TATDN2
Hs.490224|CNOT4	Hs.479223|TAPT1	Hs.475506|IQSEC1
Hs.490347|MKRN1	Hs.479766|TMEM165	Hs.475733|TOP2B
Hs.491148|PCM1	Hs.479808|IGFBP7	Hs.476092|CLEC3B
Hs.491232|SLC39A14	Hs.480073|HNRNPD	Hs.476179|SMARCC1
Hs.491494|CCT3	Hs.48029|SNAI1	Hs.47629|COL21A1
Hs.491682|PRKDC	Hs.480364|METAP1	Hs.476353|DCP1A
Hs.492203|TERT	Hs.480378|DDIT4L	Hs.476525|TMEM48
Hs.492208|NBN	Hs.480653|ANXA5	Hs.477028|RPL24
Hs.492740|ATF6	Hs.480701|MFSD8	Hs.477128|CCDC80
Hs.493218|ZNF7	Hs.480876|ANAPC10	Hs.477162|QTRTD1
Hs.493309|KIAA0020	Hs.481526|NSUN2	Hs.477481|MCM2
Hs.493649|POU2F1	Hs.481545|ADCY2	Hs.477869|PLSCR4
Hs.493668|NDUFB6	Hs.481720|MYO10	Hs.477879|H2AFX
Hs.494261|PSAT1	Hs.481852|GTF2B	Hs.479754|KIT
Hs.49427|GMIP	Hs.481980|DAB2	Hs.479808|IGFBP7
Hs.49433|ACOT4	Hs.482077|ITGA2	Hs.480073|HNRNPD
Hs.494419|LAMP1	Hs.482491|MRPS27	Hs.480378|DDIT4L
Hs.494691|PFN1	Hs.482976|C5orf30	Hs.481202|BXDC5
Hs.494705|METTL13	Hs.483238|ARHGAP29	Hs.481526|NSUN2
Hs.495417|GTF3C5	Hs.483419|PHF15	Hs.481551|MTRR
Hs.495704|RAB9A	Hs.483444|CXCL14	Hs.481571|UQCRH
Hs.495774|SCML2	Hs.483873|GM2A	Hs.481860|TARS
Hs.49582|PPP1R12A	Hs.483944|ADAM19	Hs.481980|DAB2
Hs.495985|TCIRG1	Hs.484195|C5orf41	Hs.482038|PAIP1
Hs.496068|PCTK1	Hs.484227|THOC3	Hs.482077|ITGA2
Hs.496267|IGBP1	Hs.484412|EXOC2	Hs.482491|MRPS27
Hs.496487|ATF4	Hs.485572|SOCS2	Hs.482526|TINP1
Hs.496622|PLS3	Hs.485784|SENP6	Hs.482976|C5orf30
Hs.496684|LAMP2	Hs.485899|CTTNBP2NL	Hs.483921|GEMIN5
Hs.497200|PLA2G4A	Hs.486084|C6orf203	Hs.483944|ADAM19
Hs.497788|EPRS	Hs.486589|HEBP2	Hs.484227|THOC3
Hs.498028|GNPAT	Hs.4866|SLC26A11	Hs.484289|FLJ10404
Hs.498115|TARBP1	Hs.487046|SOD2	Hs.484741|GMPR
Hs.498248|EXO1	Hs.487062|IGF2R	Hs.484813|DEK
Hs.498727|DHCR24	Hs.487412|TRIM7	Hs.485158|SPDEF
Hs.499094|PYCARD	Hs.487635|BZW2	Hs.485380|DBF4
Hs.499145|YME1L1	Hs.487933|NT5C3	Hs.487200|SMOC2
Hs.499839|RPL7A	Hs.488007|AOAH	Hs.487635|BZW2
Hs.499984|SGPL1	Hs.488173|RILPL2	Hs.487670|TMEM196
Hs.500635|EVPL	Hs.489142|COL1A2	Hs.488143|BLVRA
Hs.500674|TM9SF3	Hs.48924|ARMCX2	Hs.488181|OGDH
Hs.500842|MGEA5	Hs.490203|CALD1	Hs.489118|SAMD9L
Hs.501293|BSG	Hs.490235|LCE1D	Hs.489287|CPSF4
Hs.501728|RHOG	Hs.490394|SSBP1	Hs.490203|CALD1
Hs.501890|AMPD3	Hs.490981|MSRA	Hs.490394|SSBP1
Hs.502182|BDNF	Hs.491172|NBEA	Hs.490551|UBAP2L
Hs.502745|FADS2	Hs.491232|SLC39A14	Hs.491232|SLC39A14
Hs.502823|PRDX5	Hs.491234|RIT1	Hs.491234|RIT1
Hs.502875|RELA	Hs.491351|CLTC	Hs.491494|CCT3
Hs.502876|RHOB	Hs.491582|PLAT	Hs.491646|SGK196
Hs.503093|ZFP36L2	Hs.491682|PRKDC	Hs.491805|TOX
Hs.503315|PRKRIR	Hs.491734|C1orf92	Hs.492314|LAPTM4B
Hs.503878|NCAM1	Hs.492212|DECR1	Hs.492516|PFDN2
Hs.504062|PHLDB1	Hs.492407|YWHAZ	Hs.492599|EIF3H
Hs.504284|PEX11B	Hs.492516|PFDN2	Hs.492618|EXT1
Hs.504620|PHB2	Hs.492618|EXT1	Hs.493739|UBAP2
Hs.504877|ARHGDIB	Hs.493309|KIAA0020	Hs.494192|OSTF1
Hs.505735|NACA	Hs.494146|TMEM2	Hs.494261|PSAT1
Hs.50649|TP53I3	Hs.494261|PSAT1	Hs.494337|GOLM1
Hs.506558|HCFC2	Hs.494556|SLC35D2	Hs.494648|TEX10
Hs.506652|PWP1	Hs.494648|TEX10	Hs.495229|URM1
Hs.506748|HDGF	Hs.494691|PFN1	Hs.495511|EHMT1
Hs.50732|PRKAB2	Hs.495138|MAPKAP1	Hs.495554|NOXA1
Hs.507584|POLR1D	Hs.495311|PRDM12	Hs.495851|APOO
Hs.507669|FRY	Hs.495541|C9orf167	Hs.495985|TCIRG1
Hs.507769|ALG5	Hs.495704|RAB9A	Hs.496255|PRKCZ
Hs.508423|ABCC4	Hs.496191|TINF2	Hs.496646|IL13RA1
Hs.508524|CACYBP	Hs.496240|AR	Hs.496684|LAMP2
Hs.508716|COL4A2	Hs.496255|PRKCZ	Hs.49688|ABLIM3
Hs.508738|ARHGEF7	Hs.496544|MORC4	Hs.497741|CENPF
Hs.509067|PDGFRB	Hs.496622|PLS3	Hs.497788|EPRS
Hs.509622|RGL2	Hs.496646|IL13RA1	Hs.497867|NVL
Hs.509736|HSP90AB1	Hs.497841|SUSD4	Hs.497967|CTDSPL2
Hs.510172|HIVEP2	Hs.498292|AKT3	Hs.498160|GPR137B
Hs.510225|RPS6KA5	Hs.499793|PIGL	Hs.498173|SMPD1
Hs.510958|AQR	Hs.499839|RPL7A	Hs.498317|PPPDE1
Hs.510989|MEIS2	Hs.500333|C10orf58	Hs.499000|DNAJC1
Hs.511504|TCF12	Hs.500721|MMS19	Hs.499839|RPL7A
Hs.511768|DCTN3	Hs.500842|MGEA5	Hs.500645|ALDH18A1
Hs.511915|ENO2	Hs.50098|NDUFA4	Hs.501200|RGS10
Hs.5120|DYNLL1	Hs.501345|CTBP2	Hs.501252|TACC2
Hs.512599|CDKN2A	Hs.501452|EBI3	Hs.501289|IKZF5
Hs.512607|GDE1	Hs.501928|MICAL2	Hs.501296|ARID3A
Hs.512675|RPS8	Hs.502004|RRAS2	Hs.501735|STIM1
Hs.512676|RPS25	Hs.502182|BDNF	Hs.501778|TRIM22
Hs.512908|ARPP-19	Hs.502266|C11orf41	Hs.501898|MRVI1
Hs.513044|CSPG4	Hs.50252|MRPL32	Hs.502092|PSG9
Hs.513267|TBL3	Hs.502659|RHOC	Hs.502182|BDNF
Hs.513439|GALC	Hs.502745|FADS2	Hs.502244|EIF3M
Hs.513557|CTBS	Hs.502770|TSSC1	Hs.50252|MRPL32
Hs.513797|SLC7A5	Hs.502773|ADI1	Hs.502756|AHNAK
Hs.513803|CYBA	Hs.502829|SF1	Hs.502829|SF1
Hs.513851|YWHAE	Hs.503284|ARRB1	Hs.502842|CAPN1
Hs.514033|SPAG5	Hs.503315|PRKRIR	Hs.503239|MRPL48
Hs.514036|SDF2	Hs.503546|FADS1	Hs.503284|ARRB1
Hs.514038|FLOT2	Hs.503666|GPKOW	Hs.503315|PRKRIR
Hs.514303|PHB	Hs.503716|DCUN1D5	Hs.503716|DCUN1D5
Hs.514495|SRP68	Hs.50382|TJP2	Hs.504620|PHB2
Hs.514581|ACTG1	Hs.503878|NCAM1	Hs.504687|MYL9
Hs.514870|ATP5F1	Hs.503911|NNMT	Hs.50499|SPATA9
Hs.514934|CAPZA1	Hs.504003|BACE1	Hs.505141|TSPAN11
Hs.514950|SCPEP1	Hs.504301|TMEM45B	Hs.505154|FAM60A
Hs.515048|AP4B1	Hs.504352|NTM	Hs.505469|RACGAP1
Hs.515070|EEF2	Hs.504609|ID1	Hs.505575|GALNT6
Hs.515122|TK1	Hs.504687|MYL9	Hs.505654|ITGA5
Hs.515162|CALR	Hs.505154|FAM60A	Hs.505824|SAMM50
Hs.515210|DNAJB1	Hs.505924|HMGA2	Hs.505924|HMGA2
Hs.515255|LSM4	Hs.505934|TMBIM4	Hs.506713|TRPV4
Hs.515260|ELL	Hs.506603|APPL2	Hs.506748|HDGF
Hs.515317|IMPACT	Hs.506989|RFC5	Hs.506852|PTPN11
Hs.515469|VASP	Hs.507515|OLFML2B	Hs.506985|WSB2
Hs.515472|SNRPD2	Hs.507584|POLR1D	Hs.506989|RFC5
Hs.515475|SYMPK	Hs.507769|ALG5	Hs.507515|OLFML2B
Hs.515500|SAE1	Hs.507798|LHFP	Hs.507584|POLR1D
Hs.515517|RPL18	Hs.508021|RCBTB1	Hs.507669|FRY
Hs.515536|RRAS	Hs.50823|PDCD6	Hs.507798|LHFP
Hs.515846|RUVBL2	Hs.508644|ARGLU1	Hs.507866|C13orf15
Hs.515848|HADHB	Hs.508769|PCID2	Hs.508616|FGF14
Hs.516114|WBP1	Hs.509067|PDGFRB	Hs.508848|HNRNPC
Hs.516119|MOGS	Hs.509451|ACTR10	Hs.509140|BAZ1A
Hs.516157|MAT2A	Hs.510281|SLC24A4	Hs.509736|HSP90AB1
Hs.516173|ACYP2	Hs.510327|ASB2	Hs.509791|ERH
Hs.516484|S100A2	Hs.510402|CD46	Hs.510078|SGK1
Hs.516543|AGPS	Hs.510407|SETD3	Hs.510368|TCL6
Hs.516646|CREB1	Hs.511251|SQRDL	Hs.511251|SQRDL
Hs.516746|DAP3	Hs.511425|SRP9	Hs.511703|APH1B
Hs.516808|PDE6D	Hs.511605|ANXA2	Hs.511756|RPP40
Hs.516874|CHGB	Hs.511743|TUBB3	Hs.511816|GRPEL2
Hs.516933|NXT1	Hs.511816|GRPEL2	Hs.511915|ENO2
Hs.517034|ACSS2	Hs.511899|EDN1	Hs.512152|HLA-G
Hs.517145|ENO1	Hs.512152|HLA-G	Hs.512599|CDKN2A
Hs.517168|TAGLN2	Hs.512675|RPS8	Hs.512610|LSM7
Hs.517232|PEX19	Hs.512897|CSNK1A1L	Hs.512619|TK2
Hs.517342|NIT1	Hs.512908|ARPP-19	Hs.512627|INTS10
Hs.517543|PES1	Hs.512973|PTPLAD1	Hs.512676|RPS25
Hs.517581|HMOX1	Hs.513071|MESDC1	Hs.512898|TNFRSF14
Hs.517582|MCM5	Hs.513633|GPR56	Hs.513055|WDR61
Hs.517601|RAC2	Hs.513803|CYBA	Hs.513261|HN1L
Hs.517603|MFNG	Hs.513867|ITGAE	Hs.513313|FAM100A
Hs.517617|MAFF	Hs.513871|CYB5D2	Hs.513530|TGFB1I1
Hs.517792|VHL	Hs.513913|DULLARD	Hs.513617|MMP2
Hs.517949|MAP4	Hs.513915|CLDN7	Hs.513683|PSKH1
Hs.517962|TCTA	Hs.514050|TP53I13	Hs.513779|CRISPLD2
Hs.517973|MST1R	Hs.514242|PLEKHM1	Hs.513803|CYBA
Hs.517981|TUSC2	Hs.514435|SF3B3	Hs.513851|YWHAE
Hs.518249|CNBP	Hs.514470|SLC25A19	Hs.514196|RPL27
Hs.518530|PAK2	Hs.514581|ACTG1	Hs.514199|VAT1
Hs.518662|FAM129A	Hs.514870|ATP5F1	Hs.514242|PLEKHM1
Hs.518731|UCHL1	Hs.514920|CALCOCO2	Hs.514292|HOXB8
Hs.518750|OCIAD1	Hs.515053|AES	Hs.514435|SF3B3
Hs.518773|UBE2D3	Hs.515154|FBXW9	Hs.514806|GALNT1
Hs.519220|CNTN2	Hs.515164|GADD45GIP1	Hs.514870|ATP5F1
Hs.519294|FBN2	Hs.515242|MRPL34	Hs.515070|EEF2
Hs.519320|VDAC1	Hs.515249|ARRDC2	Hs.515329|RPL22
Hs.519445|NR2F1	Hs.515259|SSBP4	Hs.515344|PDCD2L
Hs.519632|HDAC3	Hs.515344|PDCD2L	Hs.515469|VASP
Hs.519659|DPYSL3	Hs.515879|MRPL33	Hs.515517|RPL18
Hs.519972|HLA-F	Hs.515972|CPSF3	Hs.515689|GLTPD1
Hs.520026|VARS	Hs.516076|SNRPG	Hs.515858|TSKS
Hs.520046|GPSM3	Hs.516077|FAM136A	Hs.516036|TRIM54
Hs.520063|WDR46	Hs.516105|ACTG2	Hs.516076|SNRPG
Hs.520070|CUTA	Hs.516155|CAPG	Hs.516077|FAM136A
Hs.520313|CD164	Hs.516700|CYP27A1	Hs.516155|CAPG
Hs.520414|IFNGR1	Hs.516826|TRIB3	Hs.516933|NXT1
Hs.520506|FBXO5	Hs.517094|NEURL2	Hs.516966|BCL2L1
Hs.520898|CTSB	Hs.517331|C21orf2	Hs.516998|DEFB119
Hs.520943|EIF4H	Hs.517601|RAC2	Hs.517307|MX1
Hs.521530|ASH2L	Hs.517610|MICALL1	Hs.517342|NIT1
Hs.522087|SIGMAR1	Hs.517768|BRP44	Hs.517581|HMOX1
Hs.522090|GALT	Hs.517792|VHL	Hs.517768|BRP44
Hs.522114|CLTA	Hs.517815|CHCHD4	Hs.517815|CHCHD4
Hs.522752|PSMD10	Hs.517817|TMEM43	Hs.517860|C3orf18
Hs.522891|CXCL12	Hs.517864|TEX264	Hs.518200|PARP9
Hs.522984|DDX50	Hs.517949|MAP4	Hs.518611|TBC1D14
Hs.523004|PSAP	Hs.518119|CHCHD6	Hs.518662|FAM129A
Hs.523131|TRAPPC3	Hs.518123|TFG	Hs.518774|PAICS
Hs.523185|RPL13A	Hs.518244|RPN1	Hs.51891|HERC4
Hs.523238|NOLC1	Hs.518249|CNBP	Hs.519568|P4HA2
Hs.523299|EIF3A	Hs.518417|STX6	Hs.519672|TCOF1
Hs.523329|EPHB2	Hs.518475|EIF4A2	Hs.5199|UBE2T
Hs.523443|HBB	Hs.518609|ARPC5	Hs.519972|HLA-F
Hs.523463|RPL27A	Hs.518611|TBC1D14	Hs.520037|NEU1
Hs.523687|CLP1	Hs.518774|PAICS	Hs.520506|FBXO5
Hs.523829|POLD4	Hs.519320|VDAC1	Hs.520619|PUS7
Hs.523836|GSTP1	Hs.519445|NR2F1	Hs.520623|C7orf27
Hs.523852|CCND1	Hs.519568|P4HA2	Hs.520943|EIF4H
Hs.523877|CLPB	Hs.519601|ID4	Hs.520967|MDH2
Hs.524081|DPAGT1	Hs.519672|TCOF1	Hs.521212|AKR1B1
Hs.524183|FKBP4	Hs.519783|KIAA1191	Hs.521651|STMN2
Hs.524308|TIMM23	Hs.519873|DSP	Hs.521926|NRBP2
Hs.524399|TROAP	Hs.520037|NEU1	Hs.522110|CREB3
Hs.524464|ATP5G2	Hs.520313|CD164	Hs.522413|DNM1
Hs.524518|STAT6	Hs.520898|CTSB	Hs.522433|METTL11A
Hs.524579|LYZ	Hs.520943|EIF4H	Hs.522520|C9orf37
Hs.524648|LTA4H	Hs.521124|MRPS28	Hs.522555|APOD
Hs.524760|OAS1	Hs.521651|STMN2	Hs.522584|TMSB4X
Hs.524800|KDM2B	Hs.522110|CREB3	Hs.522665|MAGED2
Hs.524899|SAP18	Hs.522310|NANS	Hs.522675|LAS1L
Hs.525006|NUFIP1	Hs.522401|FAM129B	Hs.522891|CXCL12
Hs.525600|HSP90AA1	Hs.522543|ADAMTSL2	Hs.522997|UNC5B
Hs.525622|AKT1	Hs.522545|ZNF791	Hs.523004|PSAP
Hs.526521|MDH1	Hs.522605|MID1IP1	Hs.523185|RPL13A
Hs.526754|MEIS1	Hs.522616|KDM6A	Hs.523238|NOLC1
Hs.527193|RPS23	Hs.522632|TIMP1	Hs.523446|COL11A1
Hs.52788|FXR2	Hs.522640|PCSK1N	Hs.523467|NRIP3
Hs.527919|KPNA3	Hs.522650|MAGED4B	Hs.523852|CCND1
Hs.527989|NXN	Hs.522665|MAGED2	Hs.524009|AASDHPPT
Hs.528050|HARS	Hs.522675|LAS1L	Hs.524014|SLC35F2
Hs.528087|ITPKB	Hs.522789|FAM127A	Hs.524082|NLRX1
Hs.528803|UQCRC2	Hs.522891|CXCL12	Hs.524121|ROBO4
Hs.528952|TRIM25	Hs.522895|RASSF4	Hs.524134|GATA3
Hs.529400|IFNAR1	Hs.523080|ZCCHC24	Hs.524183|FKBP4
Hs.529495|DYNC1LI1	Hs.523238|NOLC1	Hs.524224|C1R
Hs.529618|TFRC	Hs.523302|PRDX3	Hs.524250|GABARAPL1
Hs.529989|RNASET2	Hs.523309|BAG3	Hs.524308|TIMM23
Hs.530053|RABGEF1	Hs.523332|OAT	Hs.524430|NR4A1
Hs.530096|EIF3I	Hs.523446|COL11A1	Hs.524464|ATP5G2
Hs.530331|PDHA1	Hs.523506|WARS2	Hs.524498|PA2G4
Hs.530461|HIST2H2AA3	Hs.523652|PAQR7	Hs.524574|NUP107
Hs.530749|PPFIA1	Hs.523687|CLP1	Hs.524630|UBE2N
Hs.5308|UBA52	Hs.523835|CDK2AP2	Hs.524828|ZNF664
Hs.530904|CSRP2	Hs.523836|GSTP1	Hs.524910|FTH1
Hs.531176|SARS	Hs.524368|VDR	Hs.525017|PAAF1
Hs.531701|RNFT1	Hs.524491|PAPSS2	Hs.525091|TOE1
Hs.531752|RANBP3	Hs.524630|UBE2N	Hs.525232|LRP10
Hs.531788|DPY30	Hs.524660|GOLGA2L1	Hs.525600|HSP90AA1
Hs.531807|ARHGAP25	Hs.524741|ANAPC7	Hs.525629|MTA1
Hs.531818|POLR1A	Hs.524828|ZNF664	Hs.525796|C15orf23
Hs.532216|MTERF	Hs.525232|LRP10	Hs.525899|TOMM6
Hs.532265|WDSOF1	Hs.525324|CDKN2C	Hs.526902|RGMB
Hs.532315|SLC31A1	Hs.525419|LIMA1	Hs.527193|RPS23
Hs.532504|GPR132	Hs.525459|DLST	Hs.528006|DBP
Hs.532824|MAPRE2	Hs.525607|TNFAIP2	Hs.528007|U2AF2
Hs.533013|CBS	Hs.5258|MAGED1	Hs.528572|SORBS3
Hs.533040|PDLIM7	Hs.526902|RGMB	Hs.528574|TOP1MT
Hs.533055|KAT2B	Hs.527295|ENPP1	Hs.528668|RPL6
Hs.533237|WDR36	Hs.527973|SOCS3	Hs.528763|SNRPA1
Hs.533355|MPP6	Hs.528222|NDUFS4	Hs.529317|HERC6
Hs.533549|EIF2B3	Hs.528300|PITRM1	Hs.529631|RPL35A
Hs.533712|RBM4	Hs.528305|KDELR3	Hs.529755|SHARPIN
Hs.533725|TMEM126A	Hs.528703|ANKRD13A	Hs.529778|CENPK
Hs.533831|USPL1	Hs.529618|TFRC	Hs.529798|C5orf32
Hs.534168|NDUFA1	Hs.529846|CAMLG	Hs.530024|GGCT
Hs.534169|HSPA14	Hs.530251|TAF12	Hs.530199|ANKRD46
Hs.534206|DNTT	Hs.530275|NIPSNAP3A	Hs.530261|C9orf103
Hs.534307|CCND3	Hs.531085|TBX2	Hs.530275|NIPSNAP3A
Hs.534313|EGR3	Hs.531330|CBWD1	Hs.530595|STAT2
Hs.534314|EIF5A	Hs.531561|EMP2	Hs.530970|BCL7A
Hs.534333|NDUFA2	Hs.531713|COPS8	Hs.532019|MRPL1
Hs.534334|NOP2	Hs.532082|IL6ST	Hs.532082|IL6ST
Hs.534384|PQBP1	Hs.532357|TRIM21	Hs.532265|WDSOF1
Hs.534517|ASB16	Hs.532359|RPL5	Hs.532286|YTHDF2
Hs.53454|TOPBP1	Hs.533260|KIAA0649	Hs.532359|RPL5
Hs.534770|PKM2	Hs.533287|WBP5	Hs.532461|RRAGC
Hs.535901|BOP1	Hs.533295|HIST1H4L	Hs.532469|PAOX
Hs.539684|EIF2S3	Hs.533514|ASMTL	Hs.532803|HN1
Hs.546256|GCSH	Hs.533543|F8A1	Hs.532815|EMILIN2
Hs.546261|HNRNPA1	Hs.533551|PPRC1	Hs.532835|C18orf55
Hs.546267|MMP16	Hs.533628|URB2	Hs.533013|CBS
Hs.546282|RBBP8	Hs.533655|TYSND1	Hs.533066|C6orf81
Hs.546286|RPS3	Hs.533657|NUDT13	Hs.533122|TRA2B
Hs.546288|RPS9	Hs.533721|KIAA0284	Hs.533139|C7orf43
Hs.546299|SNAPC3	Hs.533732|SRP14	Hs.533355|MPP6
Hs.546323|SUCLA2	Hs.533738|C11orf60	Hs.533474|PPP1R8
Hs.547696|NUP155	Hs.534169|HSPA14	Hs.533566|H19
Hs.547964|DLEU2	Hs.534196|GNG10	Hs.533573|CDC7
Hs.552|SRD5A1	Hs.534330|MT1E	Hs.533613|TNNT2
Hs.554822|UGT1A1	Hs.534334|NOP2	Hs.533655|TYSND1
Hs.555866|C1QBP	Hs.534360|TRIP6	Hs.533772|METRN
Hs.557550|NPM1	Hs.534375|B3GALT4	Hs.533887|SMEK1
Hs.558218|CASP8AP2	Hs.534385|THOC4	Hs.534040|KBTBD6
Hs.558396|SCD	Hs.534398|COMMD3	Hs.534169|HSPA14
Hs.558459|NUDT6	Hs.534450|ORMDL2	Hs.534310|CTAG1B
Hs.558560|FAM57B	Hs.534468|APOM	Hs.534334|NOP2
Hs.56045|STAC	Hs.534499|KRTAP1-5	Hs.534339|PRIM1
Hs.567229|ACO1	Hs.534770|PKM2	Hs.534385|THOC4
Hs.567297|KHK	Hs.535901|BOP1	Hs.534499|KRTAP1-5
Hs.567337|SLC22A3	Hs.536663|ITGB5	Hs.534521|TMEM54
Hs.567367|EEA1	Hs.539684|EIF2S3	Hs.534560|SLC44A2
Hs.567374|EIF3C	Hs.53985|GP2	Hs.535011|DDX60L
Hs.567410|PSMD14	Hs.546256|GCSH	Hs.535896|HEATR2
Hs.567498|C4orf18	Hs.546261|HNRNPA1	Hs.535901|BOP1
Hs.567567|NCAPG	Hs.546269|RPL10A	Hs.546269|RPL10A
Hs.570274|PRKRA	Hs.546282|RBBP8	Hs.546286|RPS3
Hs.571246|SLC26A4	Hs.546286|RPS3	Hs.546287|RPS7
Hs.571841|RPL7	Hs.546323|SUCLA2	Hs.546315|HIST1H3A
Hs.571886|AKR7A2	Hs.546390|RPL26L1	Hs.546390|RPL26L1
Hs.572535|LAIR1	Hs.546392|PLAC8	Hs.546392|PLAC8
Hs.574492|NUP62	Hs.546407|CAND1	Hs.547172|MAMDC2
Hs.57679|ZNF192	Hs.546408|GOLGA6	Hs.547988|CPEB1
Hs.577281|NAT10	Hs.54680|C1orf51	Hs.55028|CENPN
Hs.57813|ZNRD1	Hs.548018|	Hs.55044|PAMR1
Hs.579217|SHPK	Hs.549577|C2orf49	Hs.550502|LIAS
Hs.581725|PPID	Hs.55016|EPS8L2	Hs.551713|MBP
Hs.583348|INHBA	Hs.55205|MYPN	Hs.553712|LCE1F
Hs.584784|NUP88	Hs.552810|PIGM	Hs.554883|SUV39H2
Hs.584790|PPP2R1B	Hs.553723|RNF123	Hs.555866|C1QBP
Hs.584881|FAM162A	Hs.554740|FANCB	Hs.555974|JMJD4
Hs.584909|SCAND1	Hs.554831|POLR2D	Hs.557550|NPM1
Hs.584985|C20orf24	Hs.555866|C1QBP	Hs.558468|PDSS1
Hs.586460|NR6A1	Hs.555910|TOX4	Hs.558476|DNAJC2
Hs.587979|PTOV1	Hs.555956|NUDT5	Hs.558499|CD320
Hs.58974|CCNA2	Hs.555961|CXorf15	Hs.55940|SELM
Hs.590908|ATPIF1	Hs.556017|C1orf131	Hs.55967|SHOX2
Hs.591016|CRADD	Hs.557550|NPM1	Hs.559718|AK5
Hs.591088|IL11RA	Hs.558009|SECTM1	Hs.56|PRPS1
Hs.591156|CREBL2	Hs.558308|CEBPE	Hs.567235|RPS26
Hs.591346|CTGF	Hs.558364|ORC4L	Hs.567256|AKR1C2
Hs.591360|CCDC6	Hs.558459|NUDT6	Hs.567380|FUBP1
Hs.591499|TESK2	Hs.558476|DNAJC2	Hs.567385|PRC1
Hs.591501|ZMPSTE24	Hs.558499|CD320	Hs.567412|LRRC17
Hs.591506|MYCBP	Hs.558519|ERO1LB	Hs.567416|GRAP
Hs.591607|SLC11A1	Hs.558572|LYZL1	Hs.567567|NCAPG
Hs.591633|TRIP12	Hs.558799|PSMA3	Hs.567582|FBXO31
Hs.591642|BARD1	Hs.559718|AK5	Hs.567598|LBH
Hs.591671|NCBP2	Hs.56|PRPS1	Hs.568276|IQCD
Hs.591697|MAD2L1	Hs.564847|SNRPN	Hs.568613|SLC25A33
Hs.591715|SAP30	Hs.567385|PRC1	Hs.569700|RFNG
Hs.591761|HOMER1	Hs.567419|MGAT4B	Hs.569713|CCDC45
Hs.591768|BTF3	Hs.567498|C4orf18	Hs.570855|PDGFC
Hs.591852|ADAM9	Hs.567567|NCAPG	Hs.571841|RPL7
Hs.591931|DDX10	Hs.567598|LBH	Hs.5719|NCAPD2
Hs.591952|SLC43A1	Hs.568006|RNASEH1	Hs.572318|TIPIN
Hs.591980|WT1	Hs.568613|SLC25A33	Hs.575032|MLF1IP
Hs.592081|STUB1	Hs.569713|CCDC45	Hs.576320|C4orf34
Hs.592086|ALG1	Hs.570855|PDGFC	Hs.57813|ZNRD1
Hs.592123|SREBF1	Hs.572318|TIPIN	Hs.579264|LRRC48
Hs.592130|NR1D1	Hs.575032|MLF1IP	Hs.57988|RHBDF1
Hs.592192|CSF2RB	Hs.575631|TRIM14	Hs.5836|MRPS23
Hs.592212|TYMP	Hs.578684|LRRC28	Hs.58373|C16orf91
Hs.592282|ADAM22	Hs.57988|RHBDF1	Hs.583805|MAK16
Hs.592304|ERO1L	Hs.583348|INHBA	Hs.584242|C9orf46
Hs.592317|TGFB3	Hs.5836|MRPS23	Hs.584784|NUP88
Hs.592338|TYMS	Hs.583855|SNX6	Hs.584801|SFRS2
Hs.593171|MCC	Hs.58414|FLNC	Hs.584905|ATL1
Hs.594444|LMNA	Hs.584801|SFRS2	Hs.584909|SCAND1
Hs.595072|TOMM22	Hs.584863|MTMR15	Hs.585017|DUSP15
Hs.595669|NCBP1	Hs.584881|FAM162A	Hs.585540|MAP6
Hs.596461|IDH2	Hs.584945|TNRC6C	Hs.585944|CHAC2
Hs.596572|SR140	Hs.585540|MAP6	Hs.58785|ANO4
Hs.597216|HIF1A	Hs.585944|CHAC2	Hs.58974|CCNA2
Hs.597656|MSH2	Hs.58633|VMA21	Hs.590896|MRPL30
Hs.600114|VPS29	Hs.589862|UTP6	Hs.590900|MRPS9
Hs.603732|NCKAP1	Hs.590900|MRPS9	Hs.590943|TMEM190
Hs.603842|MAGI2	Hs.590970|AXL	Hs.590958|FOSB
Hs.604001|HNRNPH1	Hs.591003|NIPA2	Hs.591033|MMP19
Hs.604789|MCCC2	Hs.591133|FBN1	Hs.591054|BID
Hs.605445|ERRFI1	Hs.591160|EPS8	Hs.591084|FANCG
Hs.6076|COPS3	Hs.591185|PITPNC1	Hs.591110|IDH3A
Hs.607776|MINA	Hs.591198|EVI2A	Hs.591133|FBN1
Hs.609663|LAMC1	Hs.591286|PTX3	Hs.591145|MANSC1
Hs.610830|PRKCSH	Hs.591293|ALCAM	Hs.591156|CREBL2
Hs.61418|MFAP1	Hs.591318|BOC	Hs.591171|COX11
Hs.62192|F3	Hs.591346|CTGF	Hs.591290|PODXL2
Hs.622596|SEC62	Hs.591347|TPD52L1	Hs.591333|NDUFAF4
Hs.624291|BAX	Hs.591457|POLR3C	Hs.591347|TPD52L1
Hs.628393|CLN3	Hs.591506|MYCBP	Hs.591358|CSTF2T
Hs.630189|JARID2	Hs.591518|KDM1	Hs.591363|ZWINT
Hs.631535|AKT2	Hs.591642|BARD1	Hs.591405|DDX20
Hs.631550|ARHGEF1	Hs.591668|LRTM1	Hs.591458|UCHL5
Hs.631579|PPP1R12C	Hs.591706|TSPAN5	Hs.591506|MYCBP
Hs.631593|PPP1R15A	Hs.591712|ASB5	Hs.591518|KDM1
Hs.631602|NUCB1	Hs.591731|HNRNPAB	Hs.591605|TMBIM1
Hs.631604|SUPT5H	Hs.591757|NDUFAF2	Hs.591654|POU1F1
Hs.631709|RAD51	Hs.591761|HOMER1	Hs.591691|PCDH18
Hs.631768|KDM5C	Hs.591767|CETN3	Hs.591697|MAD2L1
Hs.631914|UCN2	Hs.591774|ERBB2IP	Hs.591710|DDX60
Hs.631995|SLC39A7	Hs.591849|C8orf4	Hs.591712|ASB5
Hs.632041|EXOSC4	Hs.591947|ST3GAL4	Hs.591757|NDUFAF2
Hs.632082|SLIT1	Hs.592009|VPS33A	Hs.591761|HOMER1
Hs.632199|PLA2G15	Hs.592082|AXIN1	Hs.591768|BTF3
Hs.632239|MNT	Hs.592116|FAM64A	Hs.591931|DDX10
Hs.632258|IFI35	Hs.592121|RABEP1	Hs.592004|PUS1
Hs.632264|TGIF2	Hs.592225|ARMCX3	Hs.592116|FAM64A
Hs.632317|AP4M1	Hs.59236|ANKRD27	Hs.592212|TYMP
Hs.632326|SFRS5	Hs.594084|ANKHD1	Hs.592338|TYMS
Hs.632447|WDR42A	Hs.594481|SERPINB2	Hs.59236|ANKRD27
Hs.632472|RFX5	Hs.594708|SH3PXD2A	Hs.593382|TGOLN2
Hs.632531|CIR	Hs.595053|HSPD1	Hs.593833|DDR2
Hs.632586|CXCL10	Hs.59506|DMRT2	Hs.594180|NFIA
Hs.632691|C9orf43	Hs.595072|TOMM22	Hs.594481|SERPINB2
Hs.632707|MARS	Hs.596449|SERPINH1	Hs.595053|HSPD1
Hs.632717|MYL6	Hs.596461|IDH2	Hs.595056|RPL23AP7
Hs.632733|ALDH2	Hs.596514|ATP6V0B	Hs.595072|TOMM22
Hs.633514|TIMP2	Hs.596572|SR140	Hs.595669|NCBP1
Hs.634680|GPN3	Hs.601143|SH3BP1	Hs.596479|CCNJ
Hs.63489|PTPN6	Hs.601293|LOC644215	Hs.596982|POLM
Hs.635|CACNB1	Hs.602571|EXOSC3	Hs.597422|SLC17A5
Hs.635690|PPT2	Hs.603154|GPRASP2	Hs.597656|MSH2
Hs.642042|RAD54L	Hs.603842|MAGI2	Hs.602571|EXOSC3
Hs.642874|RAB8A	Hs.604479|HEXA	Hs.603111|RND2
Hs.643436|ZNF146	Hs.604588|SMAD1	Hs.604001|HNRNPH1
Hs.643447|ICAM1	Hs.605445|ERRFI1	Hs.604588|SMAD1
Hs.643610|ACO2	Hs.60640|VWCE	Hs.605445|ERRFI1
Hs.643683|ITM2B	Hs.607819|SLC25A32	Hs.607212|IGFBP5
Hs.643802|BTRC	Hs.610979|	Hs.6076|COPS3
Hs.643813|ITGB1	Hs.612385|NEXN	Hs.6093|ARRDC4
Hs.645227|TGFB1	Hs.61472|BOLA3	Hs.612084|ZHX1
Hs.646856|KIF15	Hs.615360|ZKSCAN1	Hs.613351|KIF22
Hs.647069|SLC4A2	Hs.616962|GDF15	Hs.61441|RBM27
Hs.647371|MT2A	Hs.62180|ANLN	Hs.615092|NUSAP1
Hs.647421|GABARAP	Hs.62192|F3	Hs.616962|GDF15
Hs.648394|EIF4B	Hs.623974|FBXL18	Hs.62192|F3
Hs.65029|GAS1	Hs.624002|AGPAT5	Hs.623974|FBXL18
Hs.650382|RAB5C	Hs.624291|BAX	Hs.624|IL8
Hs.651221|AKAP9	Hs.62604|SPOCD1	Hs.624002|AGPAT5
Hs.652308|MTHFD1	Hs.62661|GBP1	Hs.624291|BAX
Hs.653202|ARF5	Hs.626637|LOXL2	Hs.62661|GBP1
Hs.653255|ULBP1	Hs.628152|ALPK2	Hs.628152|ALPK2
Hs.653654|MAP3K1	Hs.628678|VIM	Hs.631549|SEPW1
Hs.654352|SLC1A4	Hs.628831|DECR2	Hs.631580|UBA2
Hs.654379|CD151	Hs.62919|BATF3	Hs.631627|CHERP
Hs.654393|E2F1	Hs.631504|RASSF2	Hs.631699|BUB1B
Hs.654400|IMPDH2	Hs.631580|UBA2	Hs.631733|GPRC5A
Hs.654401|IMPDH1	Hs.631591|ZNF382	Hs.631967|CENPH
Hs.654411|OCA2	Hs.631597|CACNG7	Hs.631971|MRPS36
Hs.654427|DHODH	Hs.631618|TPM4	Hs.632102|C1QTNF5
Hs.654434|ACE	Hs.631630|PRKACA	Hs.632176|38595
Hs.654435|AKR1A1	Hs.631633|ELOF1	Hs.632191|DCTPP1
Hs.654441|BCKDHB	Hs.631655|LEPREL2	Hs.632258|IFI35
Hs.654444|S100A4	Hs.631693|LYSMD2	Hs.632267|SDC4
Hs.654456|HOXB5	Hs.631750|PRR11	Hs.632282|SLC25A5
Hs.654465|GCLC	Hs.631789|SETDB2	Hs.632398|DPH2
Hs.654481|TP53	Hs.631967|CENPH	Hs.632466|CTSK
Hs.654484|POLB	Hs.631991|HLA-DOA	Hs.632527|SLC35F5
Hs.654490|RARB	Hs.631995|SLC39A7	Hs.632535|SSB
Hs.654560|HOXB3	Hs.632041|EXOSC4	Hs.632555|AP1S3
Hs.654566|IRF2	Hs.632177|MVP	Hs.632578|ZNF639
Hs.654581|PRPS2	Hs.632191|DCTPP1	Hs.632703|RPL41
Hs.654582|GTF2F2	Hs.632219|SOLH	Hs.632717|MYL6
Hs.654583|RARA	Hs.632238|INPP5K	Hs.632828|HNRNPH2
Hs.654718|PYCR2	Hs.632249|MPDU1	Hs.63290|HACL1
Hs.654727|RRP1B	Hs.632268|DSN1	Hs.632956|HNRNPA3P1
Hs.654744|HBA2	Hs.632282|SLC25A5	Hs.633087|
Hs.654849|RAB3GAP2	Hs.632348|SLC7A8	Hs.633514|TIMP2
Hs.654949|PCNP	Hs.632367|GPR157	Hs.634680|GPN3
Hs.654951|DPM1	Hs.632415|PLK3	Hs.642660|C10orf116
Hs.655055|DBNDD2	Hs.632535|SSB	Hs.642966|TFAM
Hs.655082|KTI12	Hs.632685|TRUB2	Hs.643005|SLC40A1
Hs.655105|C14orf156	Hs.632704|TSFM	Hs.643436|ZNF146
Hs.655111|C3orf26	Hs.632717|MYL6	Hs.643480|WDR54
Hs.655170|SPAG6	Hs.632731|MYL6B	Hs.643526|NUP160
Hs.655199|MT1A	Hs.63287|CA9	Hs.643566|MAPKAPK2
Hs.655216|GTF2H2	Hs.633087|	Hs.643744|UBP1
Hs.655253|ATAD3A	Hs.634680|GPN3	Hs.643754|MED1
Hs.655333|TULP3	Hs.63841|KBTBD7	Hs.643813|ITGB1
Hs.655334|CISH	Hs.643130|PAWR	Hs.643951|PPM1G
Hs.655372|WDR74	Hs.643357|ADAMTS1	Hs.644125|KCTD12
Hs.655467|POLH	Hs.643537|CASKIN1	Hs.644217|PNRC2
Hs.655738|C9orf125	Hs.643580|PRPF40A	Hs.644420|TAOK3
Hs.655782|EIF2A	Hs.643683|ITM2B	Hs.644599|GPRC5D
Hs.655788|NDUFB2	Hs.643813|ITGB1	Hs.644628|RPL4
Hs.655969|ERF	Hs.643951|PPM1G	Hs.646353|PSG11
Hs.656|CDC25C	Hs.644125|KCTD12	Hs.647064|RARRES2
Hs.656466|ANP32E	Hs.644633|TIMP3	Hs.647086|REPIN1
Hs.656586|ADK	Hs.645184|ARL2BP	Hs.647120|MLL3
Hs.656646|GTF3C4	Hs.646353|PSG11	Hs.647419|CD68
Hs.657969|ZNF142	Hs.646575|PSMD12	Hs.647707|DARS2
Hs.658190|PDK3	Hs.646856|KIF15	Hs.650174|HLA-E
Hs.658464|GINS1	Hs.647086|REPIN1	Hs.652235|PSCA
Hs.660109|RRP15	Hs.647370|MT1M	Hs.652308|MTHFD1
Hs.661425|PROL1	Hs.647371|MT2A	Hs.65234|DDX27
Hs.66196|NTHL1	Hs.649497|DYNC1H1	Hs.653162|FASTKD3
Hs.662174|HIST1H4E	Hs.651219|NDUFA5	Hs.653163|TAF9
Hs.66394|RNF4	Hs.653262|ANGPTL2	Hs.653262|ANGPTL2
Hs.66581|PDIA2	Hs.65436|LOXL1	Hs.654354|CD99
Hs.66708|VAMP3	Hs.654400|IMPDH2	Hs.654379|CD151
Hs.673851|HIST1H2BN	Hs.654415|PSG5	Hs.654386|CDH13
Hs.675564|DCTN4	Hs.654420|POU2F2	Hs.654404|HLA-C
Hs.6764|HDAC6	Hs.654423|ABO	Hs.654413|PSG3
Hs.679229|HIST1H2AD	Hs.654427|DHODH	Hs.654414|PSG6
Hs.67928|ELF3	Hs.654463|GEM	Hs.654415|PSG5
Hs.68714|SFRS1	Hs.654471|ZNF91	Hs.654427|DHODH
Hs.68879|BMP4	Hs.654529|AP3M2	Hs.654432|ACTN3
Hs.69089|GLA	Hs.654543|TUBB2A	Hs.654465|GCLC
Hs.694602|ALOXE3	Hs.654556|PRKG1	Hs.654527|PTPN2
Hs.695|CSTB	Hs.654568|KRT19	Hs.654534|CHN1
Hs.69594|HMG20A	Hs.654572|LAMA4	Hs.654543|TUBB2A
Hs.695943|ARF4	Hs.654596|ZBTB6	Hs.654568|KRT19
Hs.695953|EIF4EBP2	Hs.654599|NUCB2	Hs.654581|PRPS2
Hs.696283|NOP16	Hs.654622|LSM10	Hs.654599|NUCB2
Hs.69747|FUT1	Hs.654646|UBOX5	Hs.654643|EXOSC2
Hs.69771|CFB	Hs.654677|GNL3L	Hs.654661|C15orf57
Hs.69851|GAR1	Hs.654907|RARS	Hs.654727|RRP1B
Hs.69855|CSDE1	Hs.654961|FUT8	Hs.654801|AUTS2
Hs.699155|CANX	Hs.654963|RLBP1L1	Hs.654836|TSPAN4
Hs.699301|VDAC3	Hs.654972|RCE1	Hs.654984|CNOT6
Hs.699831|HIST1H2AC	Hs.654978|RAB27A	Hs.654989|C7orf11
Hs.699980|VAPA	Hs.655071|PRRT2	Hs.655020|MXD4
Hs.702021|HSPA8	Hs.655105|C14orf156	Hs.655105|C14orf156
Hs.702907|PPP1CB	Hs.655111|C3orf26	Hs.655111|C3orf26
Hs.70312|COX7A2	Hs.655112|SPSB4	Hs.655152|GALNTL4
Hs.70327|CRIP1	Hs.655152|GALNTL4	Hs.655182|SGOL2
Hs.703932|IGKC	Hs.655160|KRT16	Hs.655215|RFX1
Hs.705418|AHCYL1	Hs.655207|F2	Hs.655248|LPCAT3
Hs.706355|ILK	Hs.655259|MRPS5	Hs.655286|ZBTB11
Hs.706748|SLC2A1	Hs.655301|NAV3	Hs.655515|SCIN
Hs.706792|SLC25A11	Hs.655329|MRPS18B	Hs.655613|C19orf66
Hs.707901|EMP1	Hs.655372|WDR74	Hs.655782|EIF2A
Hs.708043|AKAP10	Hs.655423|APOC4	Hs.655941|RASA2
Hs.708065|TXNRD1	Hs.655467|POLH	Hs.656199|MATN3
Hs.708127|SIP1	Hs.655555|SMCR7	Hs.656214|LEFTY1
Hs.708128|KHSRP	Hs.655645|MASP2	Hs.65641|SAMD9
Hs.709|DCK	Hs.655722|IMMP2L	Hs.656473|DTL
Hs.709196|CEACAM5	Hs.655738|C9orf125	Hs.656657|ANO10
Hs.709204|KHDRBS1	Hs.655788|NDUFB2	Hs.656887|CPXM2
Hs.709216|SCARB1	Hs.655832|JUB	Hs.657015|SDCBP2
Hs.709327|UTP18	Hs.656298|TMEM87B	Hs.657345|LRRC2
Hs.709612|SCLY	Hs.656547|MSTO1	Hs.658200|ERC1
Hs.709690|BCL11B	Hs.656586|ADK	Hs.658333|ZDHHC1
Hs.709757|LSM8	Hs.656629|MT1B	Hs.658702|SLC38A11
Hs.710014|PCBD2	Hs.656790|TM2D1	Hs.658842|COL25A1
Hs.711787|CLINT1	Hs.656870|SLC25A24	Hs.658889|LGR5
Hs.71215|DOK2	Hs.656901|C19orf28	Hs.660766|LY96
Hs.712557|PSMA5	Hs.657067|LARP2	Hs.661752|GP6
Hs.713574|FANCF	Hs.657246|LSAMP	Hs.6651|VAMP4
Hs.713724|PMM2	Hs.657345|LRRC2	Hs.6686|C15orf44
Hs.714318|RFC4	Hs.657370|UST	Hs.668806|PTTG2
Hs.714332|UBE2K	Hs.657455|NR2F2	Hs.673|IL12A
Hs.715515|PRKAB1	Hs.65758|ITPR3	Hs.6838|RND3
Hs.715543|BCCIP	Hs.657656|MTBP	Hs.68879|BMP4
Hs.715556|CIB1	Hs.657729|LRP2	Hs.69360|KIF2C
Hs.716416|EI24	Hs.657857|C1orf183	Hs.694727|SERPINF1
Hs.716437|METTL7A	Hs.657953|PCDHB10	Hs.69499|TRIAP1
Hs.716438|PELP1	Hs.658245|INPP4B	Hs.696074|DHX15
Hs.716475|EIF2B1	Hs.658304|DCBLD1	Hs.696283|NOP16
Hs.716489|IER5	Hs.658534|GIPR	Hs.69851|GAR1
Hs.7165|ZNF259	Hs.659300|DNAJC22	Hs.699247|CRIM1
Hs.716513|ENTPD7	Hs.659350|HOXA9	Hs.699301|VDAC3
Hs.716515|BLM	Hs.659857|EID3	Hs.700572|CYB5R3
Hs.716697|LATS1	Hs.660076|ZNF19	Hs.701982|IL1R1
Hs.71827|RRS1	Hs.660115|PRRX2	Hs.704007|RTN4
Hs.718447|NDUFB5	Hs.66170|SMYD2	Hs.705413|LEPR
Hs.718460|SEPHS2	Hs.664560|TBL1Y	Hs.707896|FOS
Hs.718626|KIF20A	Hs.664764|FAM119A	Hs.708024|ARG2
Hs.718797|VGF	Hs.66713|CCDC85B	Hs.708072|STRBP
Hs.719078|SERBP1	Hs.669039|HUS1B	Hs.708127|SIP1
Hs.719084|DDX17	Hs.679409|	Hs.708197|PODN
Hs.719101|THY1	Hs.68061|SPHK1	Hs.709184|APLP2
Hs.719112|MCL1	Hs.6838|RND3	Hs.709192|PSG1
Hs.719127|DDX3X	Hs.690098|PODXL	Hs.709200|PSG2
Hs.719194|RAD51AP1	Hs.69089|GLA	Hs.709203|PSG7
Hs.719200|IFRD2	Hs.6909|MOXD1	Hs.709204|KHDRBS1
Hs.719206|EEF1E1	Hs.69293|HEXB	Hs.709216|SCARB1
Hs.719219|NUTF2	Hs.69330|RBBP9	Hs.709308|RPS2
Hs.719248|LRP8	Hs.69499|TRIAP1	Hs.709313|B2M
Hs.719277|SLC39A6	Hs.695943|ARF4	Hs.709327|UTP18
Hs.7235|CACNG3	Hs.695999|C18orf10	Hs.709373|RYR3
Hs.724|THRA	Hs.696014|DNAJB12	Hs.709416|SARS2
Hs.72550|HMMR	Hs.696086|SMARCE1	Hs.709550|CALML4
Hs.72901|CDKN2B	Hs.696238|BIRC2	Hs.709660|HSPB2
Hs.73133|MT3	Hs.696283|NOP16	Hs.709757|LSM8
Hs.73291|WDR12	Hs.696425|LHX2	Hs.709893|SOS1
Hs.73722|APEX1	Hs.696497|GFPT2	Hs.710036|C4orf49
Hs.73793|VEGFA	Hs.69745|FDXR	Hs.711|DEFA6
Hs.73875|FAH	Hs.69851|GAR1	Hs.711142|MYH13
Hs.74137|TMED10	Hs.699247|CRIM1	Hs.712543|THOC1
Hs.74576|GDI1	Hs.699301|VDAC3	Hs.712631|SYNC
Hs.74615|PDGFRA	Hs.700338|DDB2	Hs.714318|RFC4
Hs.75139|ARFIP2	Hs.700572|CYB5R3	Hs.714337|IFIT3
Hs.75160|PFKM	Hs.701555|TSSK1B	Hs.714340|C13orf34
Hs.75231|SLC16A1	Hs.701858|CEBPB	Hs.714730|RAB31
Hs.75243|BRD2	Hs.702021|HSPA8	Hs.715493|ZNF587
Hs.75254|IRF3	Hs.7036|NAGK	Hs.715543|BCCIP
Hs.75318|TUBA4A	Hs.704007|RTN4	Hs.715555|SMS
Hs.75367|SLA	Hs.705442|SMURF2	Hs.715600|TSC22D2
Hs.75372|NAGA	Hs.706748|SLC2A1	Hs.715615|BSCL2
Hs.75438|QDPR	Hs.706868|POLG	Hs.715623|NPC1
Hs.75516|TYK2	Hs.706966|HERPUD2	Hs.715706|NARG1
Hs.75765|CXCL2	Hs.707901|EMP1	Hs.715724|RG9MTD1
Hs.76090|TNFAIP1	Hs.708038|PGM3	Hs.715731|CYP1B1
Hs.76152|AQP1	Hs.708065|TXNRD1	Hs.715848|PPAP2B
Hs.76244|SRM	Hs.709187|DBT	Hs.716416|EI24
Hs.76272|KDM5A	Hs.709208|GNB1	Hs.716515|BLM
Hs.76884|ID3	Hs.709216|SCARB1	Hs.716658|SIX1
Hs.77221|CHKA	Hs.709257|CEP68	Hs.71827|RRS1
Hs.77498|PRPSAP1	Hs.709318|LYRM4	Hs.718425|CALU
Hs.77500|USP4	Hs.709347|SLFN5	Hs.718430|LSM14A
Hs.78466|PSMD8	Hs.709348|ZNF229	Hs.718626|KIF20A
Hs.78601|UROD	Hs.709416|SARS2	Hs.718797|VGF
Hs.78619|GGH	Hs.709461|FKBP1B	Hs.719072|RPL9
Hs.78769|THOP1	Hs.709489|STK17A	Hs.719078|SERBP1
Hs.78771|PGK1	Hs.709539|C19orf59	Hs.719087|STRAP
Hs.78788|LZTR1	Hs.709550|CALML4	Hs.719095|RPL14
Hs.78888|DBI	Hs.709581|COX16	Hs.719120|TOB2
Hs.78919|XK	Hs.709660|HSPB2	Hs.719135|LGMN
Hs.78944|RGS2	Hs.709890|ZNF516	Hs.719145|TPX2
Hs.79081|PPP1CC	Hs.709967|KRI1	Hs.719164|SDHD
Hs.7910|RYBP	Hs.710048|GPRASP1	Hs.719190|ARL4C
Hs.79110|NCL	Hs.710088|C7orf68	Hs.719195|KANK2
Hs.79334|NFIL3	Hs.710624|ANKRD35	Hs.719200|IFRD2
Hs.79353|TFDP1	Hs.711|DEFA6	Hs.719204|GLRX5
Hs.79387|PSMC5	Hs.712617|POLR3H	Hs.719206|EEF1E1
Hs.799|HBEGF	Hs.713533|LTBP1	Hs.719223|DNAJA3
Hs.8008|DMAP1	Hs.713546|SFRP1	Hs.719232|MRPL45
Hs.80343|MMP15	Hs.713560|ELOVL5	Hs.719250|SLMO2
Hs.80409|GADD45A	Hs.713611|DNMT3B	Hs.719263|CCDC107
Hs.80919|SYPL1	Hs.713636|MTP18	Hs.719309|TMEM140
Hs.8102|RPS20	Hs.714376|TMEM69	Hs.719320|IL24
Hs.81131|GAMT	Hs.714621|SMAD3	Hs.719388|CCRL1
Hs.81424|SUMO1	Hs.714736|JAG1	Hs.719403|RAB20
Hs.81469|NUBP1	Hs.714737|TBX3	Hs.72550|HMMR
Hs.82028|TGFBR2	Hs.715525|TXNIP	Hs.73291|WDR12
Hs.82432|GPD1L	Hs.715540|NFE2L2	Hs.73722|APEX1
Hs.82548|MADD	Hs.715543|BCCIP	Hs.73962|EPHA7
Hs.82609|HMBS	Hs.715555|SMS	Hs.74368|CKAP4
Hs.82916|CCT6A	Hs.715600|TSC22D2	Hs.74615|PDGFRA
Hs.82927|AMPD2	Hs.715617|MRPS25	Hs.7486|ETHE1
Hs.83147|GNL1	Hs.715673|H1F0	Hs.75056|TIMM13
Hs.83190|FASN	Hs.715677|KLF2	Hs.75061|MARCKSL1
Hs.83383|PRDX4	Hs.715731|CYP1B1	Hs.75117|ILF2
Hs.83753|SNRPB	Hs.716378|NGRN	Hs.75231|SLC16A1
Hs.83758|CKS2	Hs.716399|EPB41L1	Hs.75277|RMND5A
Hs.83761|ZNF274	Hs.716416|EI24	Hs.75285|ITIH2
Hs.84190|SLC19A1	Hs.716493|ARL6IP5	Hs.75317|SLC16A2
Hs.845|IL13	Hs.718429|DCN	Hs.75535|MYL2
Hs.85155|ZFP36L1	Hs.718432|CALHM2	Hs.75724|MRPS22
Hs.861|MAPK3	Hs.718440|IPO7	Hs.75782|GTF3C2
Hs.87205|CD180	Hs.718517|B3GNT9	Hs.75835|PMM1
Hs.8752|CNPY2	Hs.718545|SCO2	Hs.76392|ALDH1A1
Hs.87752|MSN	Hs.718624|GPR146	Hs.77221|CHKA
Hs.88013|SP4	Hs.719074|ABCC5	Hs.77695|DLGAP5
Hs.88556|HDAC1	Hs.719078|SERBP1	Hs.77783|PKMYT1
Hs.89575|CD79B	Hs.719087|STRAP	Hs.77961|HLA-B
Hs.89584|INSM1	Hs.719093|BHLHE40	Hs.78016|PNKP
Hs.89603|MUC1	Hs.719100|ARL8B	Hs.78769|THOP1
Hs.89648|AVP	Hs.719107|CDK2AP1	Hs.789|CXCL1
Hs.89649|EPHX1	Hs.719110|SULT1A4	Hs.78944|RGS2
Hs.89655|PTPRN	Hs.719122|ZDHHC9	Hs.79081|PPP1CC
Hs.89679|IL2	Hs.719126|PDZRN3	Hs.79101|CCNG1
Hs.90093|HSPA4	Hs.719153|SLC39A1	Hs.79110|NCL
Hs.90303|TSC2	Hs.719162|DIMT1L	Hs.79334|NFIL3
Hs.90875|RABIF	Hs.719194|RAD51AP1	Hs.79353|TFDP1
Hs.91579|IMP4	Hs.719200|IFRD2	Hs.80552|DPT
Hs.9194|UBAC1	Hs.719232|MRPL45	Hs.808|HNRNPF
Hs.91985|WNT10B	Hs.719241|DHRS4	Hs.81071|ECM1
Hs.928|PRTN3	Hs.719263|CCDC107	Hs.81791|TNFRSF11B
Hs.93002|UBE2C	Hs.719290|ZFP62	Hs.81848|RAD21
Hs.93574|HOXD3	Hs.719348|ALG10	Hs.81892|KIAA0101
Hs.94234|FZD1	Hs.719350|OXSM	Hs.82316|IFI44
Hs.95577|CDK4	Hs.719353|POLR1C	Hs.82432|GPD1L
Hs.9589|UBQLN1	Hs.724|THRA	Hs.82916|CCT6A
Hs.9701|GADD45G	Hs.7277|PEX3	Hs.83293|ANKIB1
Hs.9731|NFKBIB	Hs.73088|RASL10A	Hs.83758|CKS2
Hs.98170|ZFPL1	Hs.73172|GFI1	Hs.84113|CDKN3
Hs.98643|RAP2B	Hs.73291|WDR12	Hs.85570|NLE1
	Hs.74368|CKAP4	Hs.85769|DNTTIP2
	Hs.744|FDX1	Hs.85951|XPOT
	Hs.74615|PDGFRA	Hs.86092|MYLK2
	Hs.75056|TIMM13	Hs.86970|UTP23
	Hs.75064|TBCC	Hs.8715|C4orf14
	Hs.75093|PLOD1	Hs.878|SORD
	Hs.75189|DAP	Hs.88523|C13orf3
	Hs.75231|SLC16A1	Hs.89497|LMNB1
	Hs.7527|REXO2	Hs.90073|CSE1L
	Hs.75317|SLC16A2	Hs.9043|NGDN
	Hs.75318|TUBA4A	Hs.90691|NPM3
	Hs.75438|QDPR	Hs.90875|RABIF
	Hs.75514|NP	Hs.91109|PRR15
	Hs.75527|ADSL	Hs.91161|PFDN4
	Hs.75528|GNL2	Hs.92308|LOC144438
	Hs.75724|MRPS22	Hs.926|MX2
	Hs.75765|CXCL2	Hs.93002|UBE2C
	Hs.76090|TNFAIP1	Hs.93574|HOXD3
	Hs.76392|ALDH1A1	Hs.95231|FHOD1
	Hs.76686|GPX1	Hs.95424|MAP4K1
	Hs.76884|ID3	Hs.96852|EDC3
	Hs.76917|FBXO8	Hs.97084|NCR1
	Hs.77274|PLAU	Hs.97464|RNF17
	Hs.77961|HLA-B	Hs.97644|SCGB2A1
	Hs.78771|PGK1	Hs.98008|GK2
	Hs.789|CXCL1	Hs.98785|FGFBP2
	Hs.78944|RGS2	Hs.99195|GPR125
	Hs.78948|RABGGTB	Hs.9925|TRMT12
	Hs.78960|LATS2	Hs.99962|SLC43A3
	Hs.79110|NCL
	Hs.79334|NFIL3
	Hs.808|HNRNPF
	Hs.80976|MKI67
	Hs.81791|TNFRSF11B
	Hs.81874|MGST2
	Hs.81892|KIAA0101
	Hs.82071|CITED2
	Hs.82432|GPD1L
	Hs.83169|MMP1
	Hs.83347|AAMP
	Hs.83381|GNG11
	Hs.83530|ARMCX6
	Hs.84753|NT5DC2
	Hs.8526|B3GNT1
	Hs.85570|NLE1
	Hs.85769|DNTTIP2
	Hs.85951|XPOT
	Hs.8619|SOX18
	Hs.8739|ELP2
	Hs.87469|ACCN4
	Hs.87752|MSN
	Hs.878|SORD
	Hs.8867|CYR61
	Hs.90073|CSE1L
	Hs.9029|KRT23
	Hs.91579|IMP4
	Hs.9315|OLFML3
	Hs.93764|CPA4
	Hs.94695|IFI27L2
	Hs.94865|TEAD4
	Hs.94896|TMEM14A
	Hs.95243|TCEAL1
	Hs.9527|C2orf28
	Hs.95424|MAP4K1
	Hs.9661|PSMB10
	Hs.98008|GK2
	Hs.9857|DCXR
	Hs.99120|DDX3Y
	Hs.9914|FST
	Hs.99486|SLC25A22
	Hs.99819|USP16
