# Supplementary material for: A Core MYC Gene Expression Signature Is Prominent in Basal-Like Breast Cancer but Only Partially Overlaps the Core Serum Response
Source: PLoS One. 2009 Aug 19;4(8):e6693. doi: 10.1371/journal.pone.0006693 (PMC2723908; doi:10.1371/journal.pone.0006693)
Supplement: Table S6 — Direction of MYC signature genes that have evidence for MYC binding. (0.09 MB XLS) [file pone.0006693.s009.xls]

## Sheet: Summary
All MYC signature genes	398
MYC signature genes (unigene build 219), up in either timecourse or steadystate study:	254
And, have evidence for direct MYC binding in Palmer or Orkin study:	134
Percentage	52.8%
MYC signature genes (unigene build 219), down in either timecourse or steadystate study:	164
And, have evidence for direct MYC binding in Palmer or Orkin study:	22
Percentage	13.4%

## Sheet: Evidence for MYC binding
Evidence for MYC binding in Palmer or Orkin study
Hs.10842|RAN
Hs.118241|CABC1
Hs.124246|C10orf119
Hs.125113|CCT8
Hs.150458|RPUSD4
Hs.1600|CCT5
Hs.177766|PARP1
Hs.184233|HSPA9
Hs.22452|TMEM63C
Hs.231411|TBRG4
Hs.250666|HES1
Hs.25338|PRSS23
Hs.26703|CNOT8
Hs.269909|C14orf147
Hs.271695|NOB1
Hs.280130|RPS24
Hs.283734|MRPL47
Hs.288224|MRPL50
Hs.295563|C12orf45
Hs.299002|FBL
Hs.302408|RNF138
Hs.337295|STIP1
Hs.346868|EBNA1BP2
Hs.363137|TCP1
Hs.376064|NOP56
Hs.388170|TSR1
Hs.401842|RSL1D1
Hs.434044|PRKCDBP
Hs.434953|HMGB2
Hs.44402|CSTF3
Hs.467701|ODC1
Hs.469723|RCC1
Hs.471104|NOP58
Hs.472038|UTP11L
Hs.473648|GART
Hs.482491|MRPS27
Hs.490394|SSBP1
Hs.494261|PSAT1
Hs.505154|FAM60A
Hs.514435|SF3B3
Hs.516076|SNRPG
Hs.518774|PAICS
Hs.521651|STMN2
Hs.532082|IL6ST
Hs.532359|RPL5
Hs.534334|NOP2
Hs.534385|THOC4
Hs.535901|BOP1
Hs.546286|RPS3
Hs.557550|NPM1
Hs.572318|TIPIN
Hs.591518|KDM1
Hs.624002|AGPAT5
Hs.624291|BAX
Hs.631580|UBA2
Hs.632191|DCTPP1
Hs.654427|DHODH
Hs.655111|C3orf26
Hs.655152|GALNTL4
Hs.6838|RND3
Hs.696283|NOP16
Hs.69851|GAR1
Hs.719078|SERBP1
Hs.719232|MRPL45
Hs.73291|WDR12
Hs.79110|NCL
Hs.808|HNRNPF
Hs.103106|LSM2
Hs.105642|GNB1L
Hs.1197|HSPE1
Hs.121028|ASPM
Hs.133397|ITGA6
Hs.151777|EIF2S1
Hs.162717|HPDL
Hs.167046|ADORA2B
Hs.180591|NUP35
Hs.199579|MRPL42
Hs.224764|CRLS1
Hs.231761|C14orf104
Hs.272822|RUVBL1
Hs.289271|CYC1
Hs.301048|SEH1L
Hs.309090|SFRS7
Hs.325321|WDR18
Hs.356554|TRIT1
Hs.371016|TBC1D2
Hs.387804|PABPC1
Hs.408061|FABP5
Hs.412462|R3HDM1
Hs.4253|CCDC86
Hs.430075|COX7C
Hs.430733|CLNS1A
Hs.432574|POLR2H
Hs.435166|LBR
Hs.435735|SLC5A6
Hs.437403|PPA1
Hs.443861|SRPK1
Hs.444118|MCM6
Hs.444986|METAP2
Hs.458360|UCK2
Hs.458598|UTP14A
Hs.458747|ANP32A
Hs.460996|TRADD
Hs.469030|MTHFD2
Hs.473838|PSMG1
Hs.474206|HIRA
Hs.477879|H2AFX
Hs.481526|NSUN2
Hs.487635|BZW2
Hs.492516|PFDN2
Hs.511816|GRPEL2
Hs.514870|ATP5F1
Hs.515344|PDCD2L
Hs.517815|CHCHD4
Hs.519672|TCOF1
Hs.522675|LAS1L
Hs.522891|CXCL12
Hs.534169|HSPA14
Hs.546269|RPL10A
Hs.555866|C1QBP
Hs.558476|DNAJC2
Hs.558499|CD320
Hs.56|PRPS1
Hs.567385|PRC1
Hs.569713|CCDC45
Hs.575032|MLF1IP
Hs.57988|RHBDF1
Hs.590900|MRPS9
Hs.59236|ANKRD27
Hs.602571|EXOSC3
Hs.632282|SLC25A5
Hs.634680|GPN3
Hs.647086|REPIN1
Hs.655105|C14orf156
Hs.709416|SARS2
Hs.715543|BCCIP
Hs.719087|STRAP
Hs.719200|IFRD2
Hs.719263|CCDC107
Hs.75056|TIMM13
Hs.75231|SLC16A1
Hs.81892|KIAA0101
Hs.82432|GPD1L
Hs.85570|NLE1
Hs.90073|CSE1L
Hs.95424|MAP4K1

## Sheet: Down in Signature
ProbeID, MYC signature gene down in either study	unigene build 219	unique unigene build 219	Have evidence for MYC binding
A_23_P39766	Hs.116448	Hs.116448	Hs.6838|RND3		MYC signature genes, down in either timecourse or steadystate study:	164
A_23_P118842	Hs.534499	Hs.534499	Hs.532082|IL6ST		And, have evidence for direct MYC binding in Palmer or Orkin study:	22
A_23_P374082	Hs.483944	Hs.483944	Hs.57988|RHBDF1
A_23_P101054	Hs.296942	Hs.296942	Hs.133397|ITGA6
A_23_P141394	Hs.463964	Hs.463964	Hs.522891|CXCL12
A_23_P27584	Hs.380906	Hs.380906	Hs.434044|PRKCDBP
A_23_P58396	Hs.570855	Hs.570855	Hs.521651|STMN2
A_23_P414273	Hs.29444	Hs.29444	Hs.371016|TBC1D2
A_23_P210210	Hs.468410	Hs.468410	Hs.719263|CCDC107
A_23_P126782	Hs.62192	Hs.62192	Hs.25338|PRSS23
A_23_P58801	Hs.526902	Hs.526902	Hs.460996|TRADD
A_23_P122007	Hs.482976	Hs.482976	Hs.56|PRPS1
A_23_P110712	Hs.171695	Hs.171695	Hs.477879|H2AFX
A_23_P127883	Hs.502182	Hs.502182	Hs.567385|PRC1
A_23_P142849	Hs.6838	Hs.6838	Hs.121028|ASPM
A_23_P302672	Hs.480378	Hs.480378	Hs.434953|HMGB2
A_23_P24129	Hs.40499	Hs.40499	Hs.719087|STRAP
A_23_P144326	Hs.591712	Hs.591712	Hs.575032|MLF1IP
A_23_P58658	Hs.532082	Hs.532082	Hs.624291|BAX
A_23_P163467	Data not found	Hs.75317	Hs.95424|MAP4K1
A_23_P137097	Hs.75317	Hs.654568	Hs.180591|NUP35
A_23_P66798	Hs.654568	Hs.332706	Hs.105642|GNB1L
A_23_P1461	Hs.332706	Hs.654543
A_23_P19291	Hs.654543	Hs.195727
A_23_P52697	Hs.195727	Hs.504687
A_23_P210428	Hs.504687	Hs.13225
A_23_P377735	Hs.13225	Hs.2820
A_23_P132619	Hs.2820	Hs.368912
A_23_P39885	Hs.368912	Hs.435215
A_23_P167096	Hs.435215	Hs.373498
A_23_P54029	Hs.373498	Hs.522665
A_23_P33898	Hs.522665	Hs.40098
A_23_P432945	Hs.40098	Hs.628152
A_23_P211926	Data not found	Hs.421194
A_23_P15876	Hs.628152	Hs.126667
A_23_P145965	Hs.421194	Hs.57988
A_23_P216609	Hs.126667	Hs.201641
A_23_P163678	Hs.57988	Hs.514242
A_23_P213386	Hs.201641	Hs.481980
A_23_P152727	Hs.514242	Hs.507798
A_23_P58476	Data not found	Hs.591133
A_23_P107356	Data not found	Hs.203691
A_23_P257871	Hs.481980	Hs.123072
A_23_P88069	Hs.507798	Hs.133397
A_23_P65678	Hs.591133	Hs.154210
A_23_P91829	Hs.203691	Hs.192221
A_23_P388164	Hs.123072	Hs.438231
A_23_P210176	Hs.133397	Hs.522891
A_23_P160117	Hs.154210	Hs.143250
A_23_P41645	Hs.192221	Hs.492618
A_23_P393620	Hs.438231	Hs.594481
A_23_P202448	Hs.522891	Hs.444099
A_23_P157865	Hs.143250	Hs.715600
A_23_P43273	Hs.492618	Hs.654599
A_23_P153185	Hs.594481	Hs.511251
A_23_P132644	Hs.444099	Hs.306051
A_23_P92230	Hs.715600	Hs.375129
A_23_P13364	Hs.654599	Hs.414795
A_23_P3221	Hs.511251	Hs.434044
A_23_P53588	Hs.306051	Hs.278573
A_23_P161698	Hs.375129	Hs.519568
A_23_P123234	Hs.414795	Hs.384598
A_23_P203475	Hs.434044	Hs.521651
A_23_P75523	Hs.278573	Hs.479808
A_23_P30363	Hs.519568	Hs.654415
A_23_P139114	Hs.384598	Hs.646353
A_23_P146274	Hs.521651	Hs.409602
A_23_P353035	Hs.479808	Hs.292156
A_23_P5103	Hs.654415	Hs.465929
A_23_P130948	Hs.646353	Hs.371016
A_23_P153733	Hs.654415	Hs.525232
A_23_P43167	Hs.409602	Hs.133892
A_23_P162047	Hs.292156	Hs.719263
A_23_P125233	Hs.465929	Hs.438953
A_23_P123662	Hs.371016	Hs.530275
A_23_P205493	Hs.525232	Hs.408434
A_23_P363348	Hs.133892	Hs.522110
A_23_P387040	Hs.719263	Hs.517768
A_23_P251104	Hs.438953	Hs.462998
A_23_P20606	Hs.530275	Hs.109051
A_23_P101093	Hs.408434	Hs.700572
A_23_P423384	Hs.522110	Hs.25338
A_23_P114929	Hs.517768	Hs.108080
A_23_P38574	Hs.462998	Hs.74368
A_23_P126388	Hs.109051	Hs.643813
A_23_P502224	Hs.700572	Hs.102267
A_23_P150789	Hs.25338	Hs.477128
A_23_P501007	Data not found	Hs.450230
A_23_P74359	Hs.108080	Hs.131226
A_23_P48058	Hs.74368	Hs.81791
A_23_P104193	Hs.643813	Hs.269512
A_23_P122216	Hs.102267	Hs.523446
A_23_P58082	Hs.477128	Hs.512152
A_23_P215634	Hs.450230	Hs.116471
A_23_P134925	Hs.131226	Hs.490203
A_23_P206018	Hs.133892	Hs.252451
A_23_P71530	Hs.81791	Hs.704007
A_23_P212696	Hs.269512	Hs.435013
A_23_P11806	Hs.523446	Hs.132902
A_23_P156645	Hs.512152	Hs.201034
A_23_P152305	Hs.116471	Hs.74615
A_23_P42575	Hs.490203	Hs.151220
A_23_P250853	Hs.252451	Hs.441047
A_23_P56930	Hs.704007	Hs.491234
A_23_P132763	Hs.435013	Hs.567598
A_23_P156417	Hs.132902	Hs.496646
A_23_P204630	Hs.201034	Hs.98008
A_23_P300033	Hs.74615	Hs.274313
A_23_P23454	Data not found	Hs.410977
A_23_P213102	Hs.151220	Hs.699247
A_23_P127948	Hs.441047	Hs.310421
A_23_P115059	Hs.491234	Hs.505924
A_23_P120227	Hs.567598	Hs.129944
A_23_P137196	Hs.496646	Hs.202453
A_23_P144507	Hs.98008	Hs.373857
A_23_P128520	Hs.274313	Hs.482077
A_23_P87013	Hs.410977	Hs.462379
A_23_P51105	Hs.699247	Hs.303090
A_23_P12549	Hs.310421	Hs.559718
A_23_P95929	Hs.505924	Hs.709660
A_23_P144835	Hs.129944	Hs.632717
A_23_P215956	Hs.202453	Hs.460996
A_23_P205142	Hs.373857	Hs.458485
A_23_P70161	Hs.482077	Hs.421621
A_23_P141180	Hs.462379	Hs.513803
A_23_P35414	Hs.303090	Hs.516155
A_23_P200015	Hs.559718	Hs.466539
A_23_P161727	Hs.709660	Hs.585540
A_23_P344973	Hs.632717	Hs.76392
A_23_P217080	Data not found	Hs.56
A_23_P54649	Hs.460996	Hs.496255
A_23_P404628	Hs.458485	Hs.711
A_23_P811	Hs.458485	Hs.278959
A_23_P67661	Hs.421621	Hs.477879
A_23_P163506	Hs.513803	Hs.248172
A_23_P165636	Hs.516155	Hs.592116
A_23_P213319	Data not found	Hs.567385
A_23_P50786	Hs.466539	Hs.121028
A_23_P47725	Hs.585540	Hs.567567
A_23_P16239	Hs.465929	Hs.434953
A_23_P65817	Data not found	Hs.719087
A_23_P83098	Hs.76392	Hs.156346
A_23_P72961	Hs.56	Hs.169840
A_23_P121285	Data not found	Hs.575032
A_23_P51187	Hs.496255	Hs.306123
A_23_P82886	Hs.711	Hs.789
A_23_P374844	Hs.278959	Hs.326035
A_23_P202624	Hs.278959	Hs.79334
A_23_P214484	Data not found	Hs.303649
A_23_P319432	Hs.477879	Hs.605445
A_23_P361347	Hs.248172	Hs.624291
A_23_P49878	Hs.592116	Hs.467751
A_23_P206059	Hs.567385	Hs.95424
A_23_P52017	Hs.121028	Hs.370166
A_23_P155815	Hs.567567	Hs.180591
A_23_P155765	Hs.434953	Hs.85951
A_23_P13852	Hs.719087	Hs.105642
A_23_P118834	Hs.156346	Hs.520037
A_23_P259586	Hs.169840	Hs.129910
A_23_P254733	Hs.575032	Hs.224008
A_23_P7033	Hs.306123	Hs.653262
A_23_P7144	Hs.789	Hs.42949
A_23_P214080	Hs.326035	Hs.189445
A_23_P32253	Hs.79334	Hs.503284
A_23_P89431	Hs.303649
A_23_P46470	Hs.605445
A_23_P208706	Hs.624291
A_23_P90689	Hs.467751
A_23_P5005	Hs.95424
A_23_P55349	Hs.370166
A_23_P102320	Hs.180591
A_23_P168800	Hs.85951
A_23_P128663	Data not found
A_23_P218753	Hs.105642
A_23_P316601	Hs.491234
A_23_P81954	Hs.520037
A_23_P212400	Hs.129910
A_23_P202881	Hs.224008
A_23_P20864	Hs.653262
A_23_P374104	Hs.653262
A_23_P131202	Hs.42949
A_23_P71328	Hs.189445
A_23_P203702	Hs.503284

## Sheet: Up in Signature
ProbeID, MYC signature gene up in either study	unigene build 219	unique unigene build 219	Unique unigenes that have Evidence for MYC binding
A_23_P374844	Hs.278959	Hs.278959	Hs.477879|H2AFX		MYC signature genes, up in either timecourse or steadystate study:	254
A_23_P202624	Hs.278959	Hs.477879	Hs.567385|PRC1		And, have evidence for direct MYC binding in Palmer or Orkin study:	134
A_23_P214484	Data not found	Hs.248172	Hs.121028|ASPM
A_23_P319432	Hs.477879	Hs.592116	Hs.434953|HMGB2
A_23_P361347	Hs.248172	Hs.567385	Hs.719087|STRAP
A_23_P49878	Hs.592116	Hs.121028	Hs.575032|MLF1IP
A_23_P206059	Hs.567385	Hs.567567	Hs.624291|BAX
A_23_P52017	Hs.121028	Hs.434953	Hs.95424|MAP4K1
A_23_P155815	Hs.567567	Hs.719087	Hs.180591|NUP35
A_23_P155765	Hs.434953	Hs.156346	Hs.435166|LBR
A_23_P13852	Hs.719087	Hs.169840	Hs.151777|EIF2S1
A_23_P118834	Hs.156346	Hs.575032	Hs.269909|C14orf147
A_23_P259586	Hs.169840	Hs.306123	Hs.302408|RNF138
A_23_P254733	Hs.575032	Hs.789	Hs.511816|GRPEL2
A_23_P7033	Hs.306123	Hs.326035	Hs.81892|KIAA0101
A_23_P7144	Hs.789	Hs.79334	Hs.719078|SERBP1
A_23_P214080	Hs.326035	Hs.303649	Hs.557550|NPM1
A_23_P32253	Hs.79334	Hs.605445	Hs.288224|MRPL50
A_23_P89431	Hs.303649	Hs.624291	Hs.280130|RPS24
A_23_P46470	Hs.605445	Hs.467751	Hs.516076|SNRPG
A_23_P208706	Hs.624291	Hs.95424	Hs.444118|MCM6
A_23_P90689	Hs.467751	Hs.370166	Hs.632282|SLC25A5
A_23_P5005	Hs.95424	Hs.180591	Hs.125113|CCT8
A_23_P55349	Hs.370166	Hs.85951	Hs.473648|GART
A_23_P102320	Hs.180591	Hs.507515	Hs.458747|ANP32A
A_23_P168800	Hs.85951	Hs.435166	Hs.299002|FBL
A_23_P128663	Data not found	Hs.503315	Hs.224764|CRLS1
A_23_P137689	Hs.507515	Hs.119192	Hs.443861|SRPK1
A_23_P200493	Hs.435166	Hs.331431	Hs.184233|HSPA9
A_23_P203686	Hs.503315	Hs.151777	Hs.75231|SLC16A1
A_23_P133147	Hs.119192	Hs.269909	Hs.430733|CLNS1A
A_23_P144294	Hs.331431	Hs.302408	Hs.709416|SARS2
A_23_P105942	Hs.151777	Hs.511816	Hs.654427|DHODH
A_23_P311150	Hs.269909	Hs.499839	Hs.75056|TIMM13
A_23_P89755	Hs.302408	Hs.81892	Hs.44402|CSTF3
A_23_P404091	Hs.511816	Hs.591506	Hs.118241|CABC1
A_23_P59828	Hs.499839	Hs.388004	Hs.572318|TIPIN
A_23_P117852	Hs.81892	Hs.446149	Hs.458598|UTP14A
A_23_P201655	Hs.591506	Hs.719078	Hs.632191|DCTPP1
A_23_P17575	Hs.388004	Hs.433278	Hs.4253|CCDC86
A_23_P314086	Data not found	Hs.557550	Hs.518774|PAICS
A_23_P53476	Hs.446149	Hs.288224	Hs.376064|NOP56
A_23_P200661	Hs.719078	Hs.381189	Hs.1197|HSPE1
A_23_P128554	Hs.433278	Hs.459927	Hs.437403|PPA1
A_23_P214037	Hs.557550	Hs.50252	Hs.272822|RUVBL1
A_23_P253412	Hs.288224	Hs.280130	Hs.150458|RPUSD4
A_23_P31315	Hs.381189	Hs.631967	Hs.408061|FABP5
A_23_P434305	Hs.459927	Hs.330663	Hs.90073|CSE1L
A_23_P111753	Hs.50252	Hs.516076	Hs.458360|UCK2
A_23_P1206	Hs.280130	Hs.444118	Hs.82432|GPD1L
A_23_P110802	Hs.631967	Hs.235782	Hs.250666|HES1
A_23_P87769	Hs.330663	Hs.494648	Hs.647086|REPIN1
A_23_P102231	Hs.516076	Hs.643951	Hs.432574|POLR2H
A_23_P90612	Hs.444118	Hs.632282	Hs.655111|C3orf26
A_23_P5901	Hs.235782	Hs.419463	Hs.655105|C14orf156
A_23_P112412	Hs.494648	Hs.125113	Hs.472038|UTP11L
A_23_P209471	Hs.643951	Hs.473648	Hs.346868|EBNA1BP2
A_23_P436179	Hs.632282	Hs.458747	Hs.487635|BZW2
A_23_P77526	Hs.419463	Hs.299002	Hs.467701|ODC1
A_23_P102870	Hs.125113	Hs.224764	Hs.231411|TBRG4
A_23_P80098	Hs.473648	Hs.443861	Hs.519672|TCOF1
A_23_P3247	Hs.458747	Hs.184233	Hs.591518|KDM1
A_23_P78888	Hs.299002	Hs.432674	Hs.473838|PSMG1
A_23_P69873	Data not found	Hs.282387	Hs.558476|DNAJC2
A_23_P400435	Hs.224764	Hs.75231	Hs.534169|HSPA14
A_23_P19543	Hs.443861	Hs.516077	Hs.715543|BCCIP
A_23_P213973	Hs.184233	Hs.430733	Hs.283734|MRPL47
A_23_P218967	Hs.432674	Hs.604588	Hs.363137|TCP1
A_23_P41942	Hs.282387	Hs.709416	Hs.631580|UBA2
A_23_P126825	Hs.75231	Hs.654427	Hs.444986|METAP2
A_23_P108641	Hs.516077	Hs.75056	Hs.482491|MRPS27
A_23_P127995	Hs.430733	Hs.633087	Hs.301048|SEH1L
A_23_P212870	Hs.604588	Hs.502829	Hs.517815|CHCHD4
A_23_P90484	Hs.709416	Hs.44402	Hs.808|HNRNPF
A_23_P58538	Data not found	Hs.118241	Hs.231761|C14orf104
A_23_P15202	Hs.654427	Hs.585944	Hs.388170|TSR1
A_23_P73383	Data not found	Hs.503716	Hs.356554|TRIT1
A_23_P56316	Hs.75056	Hs.356873	Hs.22452|TMEM63C
A_23_P68958	Hs.633087	Hs.405144	Hs.435735|SLC5A6
A_23_P318220	Hs.502829	Hs.85769	Hs.624002|AGPAT5
A_23_P105664	Data not found	Hs.369056	Hs.505154|FAM60A
A_23_P98310	Hs.44402	Hs.3873	Hs.309090|SFRS7
A_23_P158096	Data not found	Hs.572318	Hs.271695|NOB1
A_23_P85593	Hs.118241	Hs.75724	Hs.602571|EXOSC3
A_23_P28571	Hs.585944	Hs.458598	Hs.555866|C1QBP
A_23_P127533	Hs.503716	Hs.632191	Hs.69851|GAR1
A_23_P104116	Hs.356873	Hs.715555	Hs.535901|BOP1
A_23_P413761	Hs.405144	Hs.480073	Hs.401842|RSL1D1
A_23_P97584	Hs.85769	Hs.4253	Hs.59236|ANKRD27
A_23_P349928	Hs.369056	Hs.365116	Hs.167046|ADORA2B
A_23_P162805	Data not found	Hs.110849	Hs.199579|MRPL42
A_23_P62659	Hs.3873	Hs.518774	Hs.295563|C12orf45
A_23_P99930	Hs.572318	Hs.376064	Hs.73291|WDR12
A_23_P72138	Hs.75724	Hs.1197	Hs.412462|R3HDM1
A_23_P205218	Hs.458598	Hs.591757	Hs.655152|GALNTL4
A_23_P33613	Hs.632191	Hs.437403	Hs.719200|IFRD2
A_23_P251662	Hs.715555	Hs.595072	Hs.558499|CD320
A_23_P58353	Hs.480073	Hs.272822	Hs.289271|CYC1
A_23_P161918	Hs.4253	Hs.150458	Hs.471104|NOP58
A_23_P6303	Hs.365116	Hs.408061	Hs.177766|PARP1
A_23_P1585	Hs.110849	Hs.595053	Hs.719232|MRPL45
A_23_P41280	Hs.518774	Hs.90073	Hs.590900|MRPS9
A_23_P91328	Hs.376064	Hs.458360	Hs.492516|PFDN2
A_23_P56922	Hs.1197	Hs.82432	Hs.490394|SSBP1
A_23_P360983	Hs.591757	Hs.250666	Hs.696283|NOP16
A_23_P161336	Hs.437403	Hs.523238	Hs.79110|NCL
A_23_P80336	Hs.595072	Hs.647086	Hs.515344|PDCD2L
A_23_P33053	Hs.272822	Hs.432574	Hs.85570|NLE1
A_23_P21652	Hs.272822	Hs.69499	Hs.522675|LAS1L
A_23_P75540	Hs.150458	Hs.533655	Hs.1600|CCT5
A_23_P59876	Hs.408061	Hs.230601	Hs.387804|PABPC1
A_23_P210283	Hs.459927	Hs.655111	Hs.569713|CCDC45
A_23_P156226	Hs.595053	Hs.655105	Hs.124246|C10orf119
A_23_P17392	Hs.90073	Hs.472038	Hs.494261|PSAT1
A_23_P487	Hs.458360	Hs.469264	Hs.469030|MTHFD2
A_23_P318284	Hs.82432	Hs.346868	Hs.325321|WDR18
A_23_P17998	Hs.250666	Hs.435933	Hs.534385|THOC4
A_23_P202140	Hs.523238	Hs.524828	Hs.103106|LSM2
A_23_P145619	Hs.647086	Hs.487635	Hs.469723|RCC1
A_23_P29803	Hs.432574	Hs.467701	Hs.634680|GPN3
A_23_P128403	Hs.69499	Hs.231411	Hs.337295|STIP1
A_23_P423472	Hs.533655	Hs.519672	Hs.532359|RPL5
A_23_P431890	Hs.230601	Hs.591518	Hs.10842|RAN
A_23_P132874	Hs.655111	Hs.371914	Hs.26703|CNOT8
A_23_P128986	Hs.655105	Hs.644125	Hs.514870|ATP5F1
A_23_P11774	Hs.472038	Hs.473838	Hs.546286|RPS3
A_23_P131646	Hs.469264	Hs.558476	Hs.534334|NOP2
A_23_P61398	Data not found	Hs.534169	Hs.514435|SF3B3
A_23_P103631	Hs.346868	Hs.1183	Hs.546269|RPL10A
A_23_P503200	Hs.435933	Hs.518611	Hs.481526|NSUN2
A_23_P359654	Hs.524828	Hs.159142	Hs.474206|HIRA
A_23_P157215	Hs.487635	Hs.432132	Hs.430075|COX7C
A_23_P165840	Hs.467701	Hs.568613	Hs.162717|HPDL
A_23_P215652	Hs.231411	Hs.878	Hs.105642|GNB1L
A_23_P310317	Hs.519672	Hs.106601
A_23_P133	Hs.591518	Hs.520943
A_23_P141606	Hs.371914	Hs.715543
A_23_P128674	Hs.644125	Hs.283734
A_23_P68717	Hs.473838	Hs.363137
A_23_P254573	Hs.558476	Hs.631580
A_23_P63829	Hs.534169	Hs.444986
A_23_P108842	Hs.1183	Hs.482491
A_23_P33803	Data not found	Hs.301048
A_23_P155826	Hs.518611	Hs.274772
A_23_P8452	Hs.159142	Hs.517815
A_23_P74609	Hs.432132	Hs.808
A_23_P164702	Data not found	Hs.507584
A_23_P36226	Hs.568613	Hs.231761
A_23_P77103	Hs.878	Hs.388170
A_23_P328720	Hs.106601	Hs.356554
A_23_P42763	Hs.520943	Hs.22452
A_23_P202474	Hs.715543	Hs.435850
A_23_P502427	Hs.283734	Hs.435735
A_23_P122782	Hs.363137	Hs.624002
A_23_P209020	Hs.631580	Hs.491232
A_23_P99260	Hs.444986	Hs.440599
A_23_P133332	Hs.482491	Hs.505154
A_23_P78311	Hs.301048	Hs.584801
A_23_P65767	Hs.274772	Hs.309090
A_23_P428849	Hs.517815	Hs.437060
A_23_P75330	Hs.808	Hs.157351
A_23_P36924	Hs.507584	Hs.425125
A_23_P14493	Hs.231761	Hs.271695
A_23_P107086	Hs.388170	Hs.602571
A_23_P12062	Hs.356554	Hs.632535
A_23_P372925	Hs.22452	Hs.555866
A_23_P214091	Hs.435850	Hs.69851
A_23_P102508	Hs.435735	Hs.18946
A_23_P216200	Hs.624002	Hs.709550
A_23_P59950	Hs.491232	Hs.535901
A_23_P108554	Hs.440599	Hs.401842
A_23_P13663	Hs.505154	Hs.367900
A_23_P77776	Hs.584801	Hs.59236
A_23_P39704	Hs.309090	Hs.167046
A_23_P255849	Hs.437060	Hs.199579
A_23_P28420	Hs.157351	Hs.295563
A_23_P257609	Hs.425125	Hs.144304
A_23_P135084	Hs.499839	Hs.73291
A_23_P258108	Data not found	Hs.412462
A_23_P106822	Hs.271695	Hs.591761
A_23_P123905	Hs.602571	Hs.143751
A_23_P154025	Hs.632535	Hs.445758
A_23_P370434	Hs.555866	Hs.655152
A_23_P58280	Hs.69851	Hs.398157
A_23_P252536	Hs.18946	Hs.719200
A_23_P129188	Hs.709550	Hs.239370
A_23_P43800	Hs.535901	Hs.709216
A_23_P54597	Hs.401842	Hs.715731
A_23_P145146	Hs.367900	Hs.424908
A_23_P153637	Hs.59236	Hs.558499
A_23_P55477	Hs.167046	Hs.289271
A_23_P25163	Hs.199579	Hs.471104
A_23_P128532	Hs.295563	Hs.177766
A_23_P24926	Data not found	Hs.719232
A_23_P113482	Hs.144304	Hs.590900
A_23_P28625	Hs.73291	Hs.300141
A_23_P380998	Hs.412462	Hs.492516
A_23_P209987	Data not found	Hs.105465
A_23_P41917	Hs.591761	Hs.490394
A_23_P57417	Hs.143751	Hs.696283
A_23_P31713	Hs.445758	Hs.334612
A_23_P139418	Hs.655152	Hs.79110
A_23_P30254	Hs.398157	Hs.616962
A_23_P92129	Hs.719200	Hs.546392
A_23_P112756	Hs.239370	Hs.716416
A_23_P203900	Hs.709216	Hs.515344
A_23_P209625	Hs.715731	Hs.413297
A_23_P93750	Hs.424908	Hs.347144
A_23_P119693	Hs.558499	Hs.85570
A_23_P32384	Hs.289271	Hs.522675
A_23_P154447	Hs.471104	Hs.1600
A_23_P114783	Hs.177766	Hs.387804
A_23_P314151	Hs.523238	Hs.569713
A_23_P113623	Hs.719232	Hs.124246
A_23_P154315	Hs.590900	Hs.494261
A_23_P34018	Hs.300141	Hs.469030
A_23_P51906	Hs.492516	Hs.506989
A_23_P117068	Hs.105465	Hs.477481
A_23_P31534	Hs.490394	Hs.325321
A_23_P144726	Hs.696283	Hs.534385
A_23_P126291	Hs.334612	Hs.103106
A_23_P5551	Hs.79110	Hs.469723
A_23_P210649	Data not found	Hs.634680
A_23_P16523	Hs.616962	Hs.337295
A_23_P81219	Hs.546392	Hs.532359
A_23_P98321	Hs.716416	Hs.308613
A_23_P27947	Hs.515344	Hs.5836
A_23_P320578	Hs.413297	Hs.524630
A_23_P134113	Hs.347144	Hs.10842
A_23_P141315	Hs.85570	Hs.282376
A_23_P256021	Hs.522675	Hs.26703
A_23_P257863	Hs.1600	Hs.514870
A_23_P82693	Hs.387804	Hs.396644
A_23_P307400	Hs.569713	Hs.546286
A_23_P359111	Hs.719078	Hs.534334
A_23_P202594	Hs.124246	Hs.514435
A_23_P161399	Data not found	Hs.546269
A_23_P259692	Hs.494261	Hs.699301
A_23_P120315	Hs.469030	Hs.481526
A_23_P95302	Hs.506989	Hs.484227
A_23_P250801	Hs.477481	Hs.474206
A_23_P5115	Hs.325321	Hs.78944
A_23_P152984	Hs.534385	Hs.591347
A_23_P59147	Hs.103106	Hs.430075
A_23_P46306	Hs.469723	Hs.162717
A_23_P116999	Hs.634680	Hs.105642
A_23_P113078	Hs.337295	Hs.491234
A_23_P12133	Hs.532359	Hs.520037
A_23_P43071	Hs.308613	Hs.129910
A_23_P106998	Hs.5836	Hs.224008
A_23_P341471	Hs.524630	Hs.653262
A_23_P128126	Hs.10842	Hs.42949
A_23_P79951	Hs.224764	Hs.189445
A_23_P259314	Hs.282376	Hs.503284
A_23_P110843	Hs.26703
A_23_P46275	Hs.514870
A_23_P213754	Hs.396644
A_23_P139376	Hs.546286
A_23_P204364	Hs.534334
A_23_P135914	Hs.514435
A_23_P251593	Hs.546269
A_23_P166698	Data not found
A_23_P60069	Hs.699301
A_23_P7423	Hs.481526
A_23_P110742	Hs.484227
A_23_P154938	Hs.474206
A_23_P48002	Data not found
A_23_P114947	Hs.78944
A_23_P31143	Hs.591347
A_23_P125016	Data not found
A_23_P110811	Hs.430075
A_23_P74449	Hs.162717
A_23_P218753	Hs.105642
A_23_P316601	Hs.491234
A_23_P81954	Hs.520037
A_23_P212400	Hs.129910
A_23_P202881	Hs.224008
A_23_P20864	Hs.653262
A_23_P374104	Hs.653262
A_23_P131202	Hs.42949
A_23_P71328	Hs.189445
A_23_P203702	Hs.503284
